# Supplementary material for: Accessing oxy-functionalized N-heterocycles through rose bengal and TBHP integrated photoredox C(sp3)–O cross-coupling
Source: Royal Society of Chemistry journal article supplement (doi:10.1039/d2ob00381c), 2022-01-01
Supplement: d2ob00381c1.pdf [file d2ob00381c1.pdf]

## Accessing oxy-functionalized N-heterocycles through Rose-bengal and TBHP integrated photoredox C(sp<sup>3</sup>)-O cross-coupling

Rahul Dev Mandal, Moumita Saha, Asish R. Das\*

Department of Chemistry, University of Calcutta, Kolkata-700009, India

\*Corresponding author: Tel.: +913323501014, +919433120265; fax: +913323519754;

E-mail address: ardchem@caluniv.ac.in, ardas66@rediffmail.com (A R Das)

### Supporting Information

| <u>Contents</u>                                                                                                         | <u>Page no.</u> |
|-------------------------------------------------------------------------------------------------------------------------|-----------------|
| List of starting materials                                                                                              | S2-S3           |
| ORTEP diagram of single X-ray crystal structure of compounds <b>3b</b> , <b>3e</b> and <b>4a</b>                        | S3-S4           |
| Analytical X-ray crystallographic data of <b>3b</b> , <b>3e</b> and <b>4a</b>                                           | S5-S6           |
| Gram scale experiment for compound <b>4a</b>                                                                            | S7              |
| Alkenylation reaction of <b>3al</b>                                                                                     | S8              |
| HRMS analysis of Reaction of <b>3b</b>                                                                                  | S9              |
| HRMS analysis of Reaction of <b>4a</b>                                                                                  | S10             |
| <sup>1</sup> H and <sup>13</sup> C NMR spectra of compounds <b>3</b> ( <b>3a</b> to <b>3zg</b> )                        | S11-S76         |
| <sup>1</sup> H and <sup>13</sup> C NMR spectra of compounds <b>3</b> ( <b>3ab</b> to <b>3ax</b> )                       | S77-S120        |
| <sup>1</sup> H and <sup>13</sup> C NMR spectra of compounds <b>4</b> ( <b>4a</b> to <b>4h</b> and <b>4'</b> )           | S121-S138       |
| <sup>1</sup> H and <sup>13</sup> C NMR spectra of compounds ( <b>5</b> to <b>10</b> )                                   | S139-S150       |
| HRMS spectra of <b>3e</b> , <b>3t</b> , <b>3v</b> , <b>3zg</b> , <b>3ab</b> , <b>3au</b> , <b>4b</b> , <b>4'</b> , RM-3 | S151-S159       |

**List of starting materials:**

**N-heterocycles: 2-phenyl-2,3-dihydrophthalazine-1,4-dione (1a-1p), 5-bromopyridin-2(1H)-one (1q), pyrimidin-4(3H)-one (1r), 3-phenylquinoxalin-2(1H)-one (1s):**

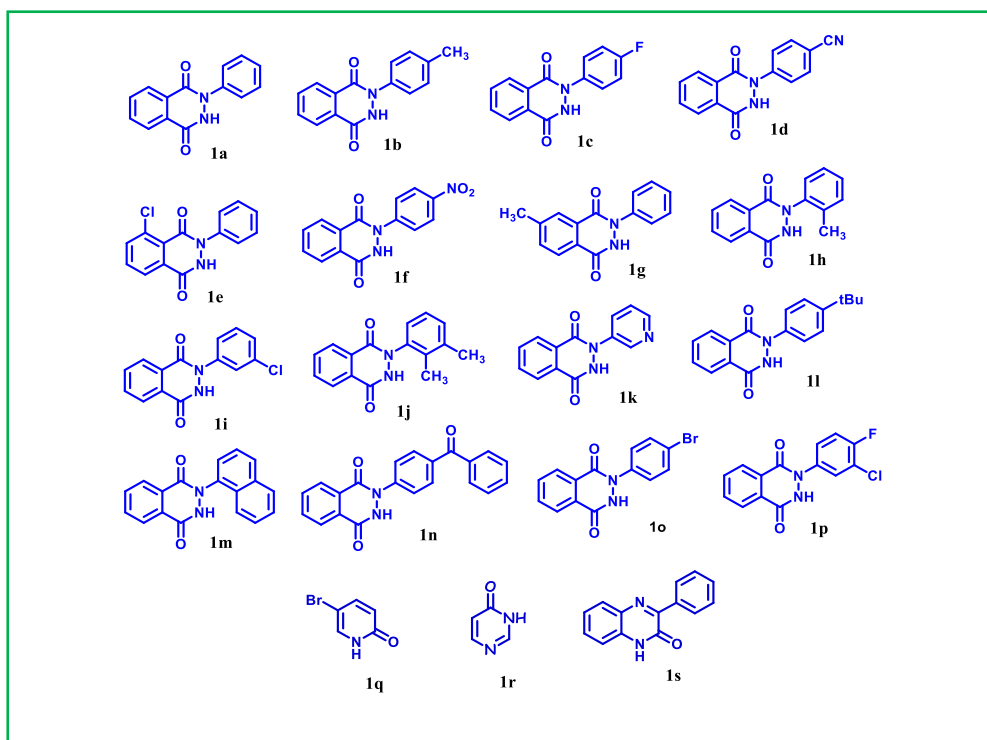

**Aryl alkyl aliphatic ketones (2v, 2w) ketone (2a), di-alkyl ketones (2z, 2af, 2ai),  $\beta$ -ketoesters (2x, 22aa to 2ae, 2aj),  $\beta$ -diketones (2v, 2ag, 2ah), DMF (2ak) and nitroalkane (2al, 2am):**

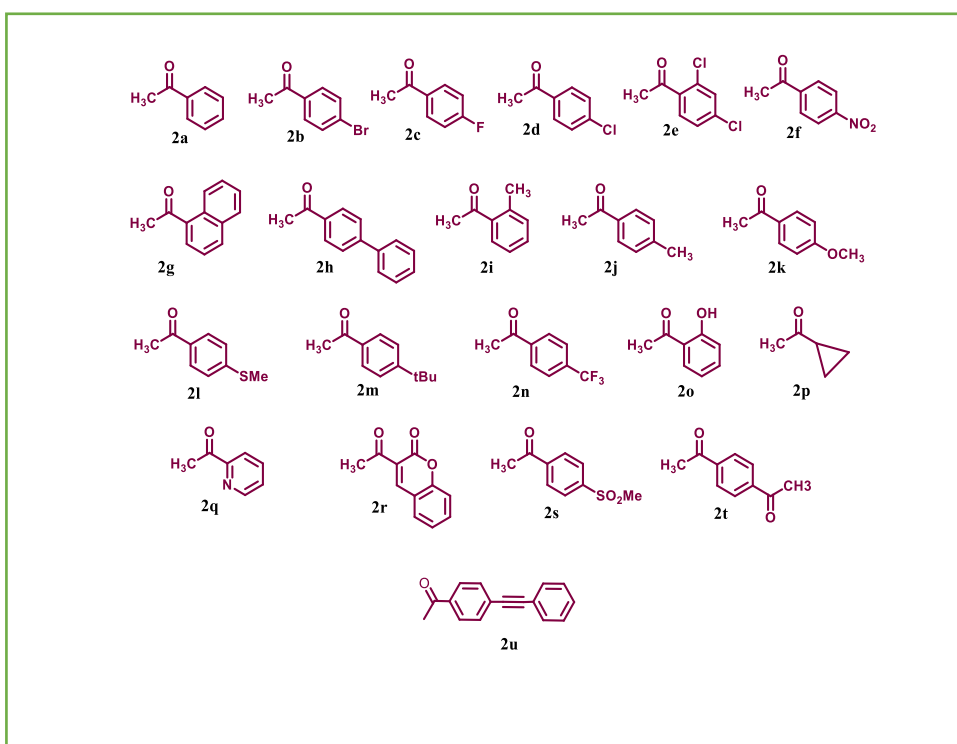

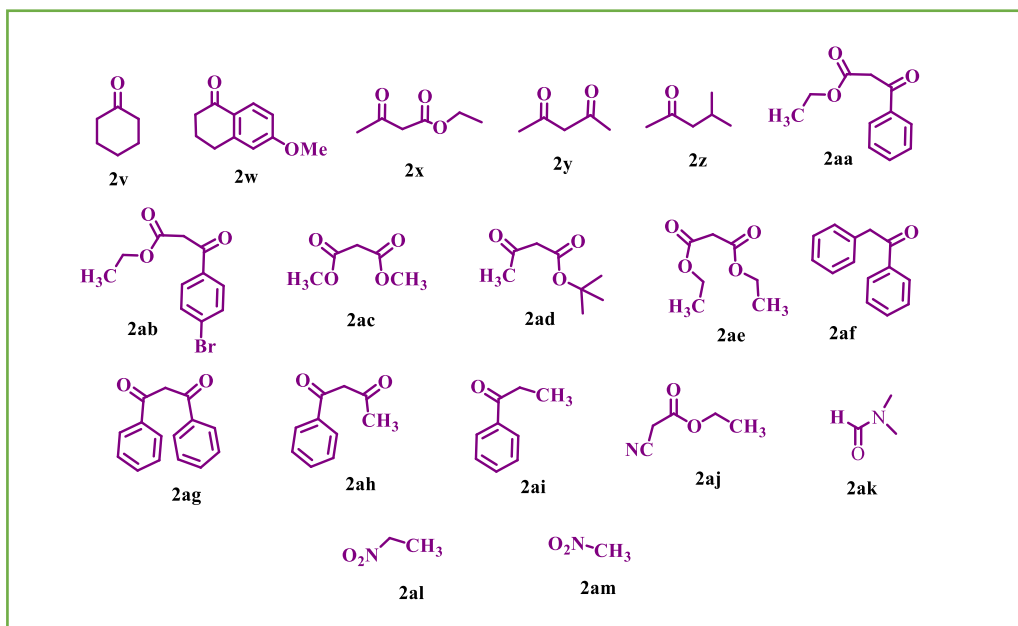

**X-ray Crystallographic analysis of compound 3b (CCDC 2103982), 3e (CCDC 2103980) 4a (CCDC 2103983):**

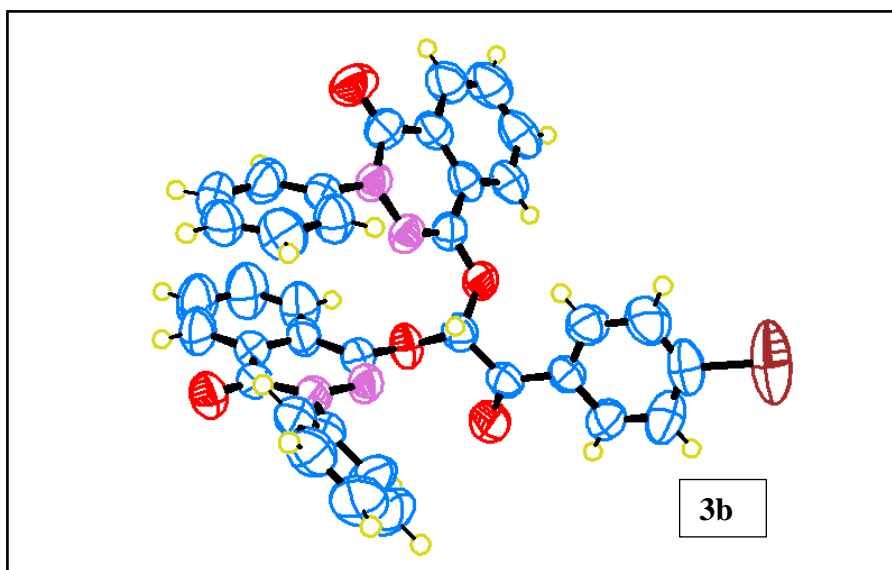

**Figure S1.** ORTEP diagram of X-ray crystal structure of compounds **3b** (CCDC No. **2103982**).

The ellipsoid contour percent probability level is 60%. Color code: red, oxygen; pink, nitrogen; brown, bromine; blue, carbon; yellow, hydrogen. The crystal was grown from ethyl acetate. 30 mg of **3b** was dissolved in 0.5 mL of ethyl acetate under heating and the solvent was evaporated slowly in a cold atmosphere.

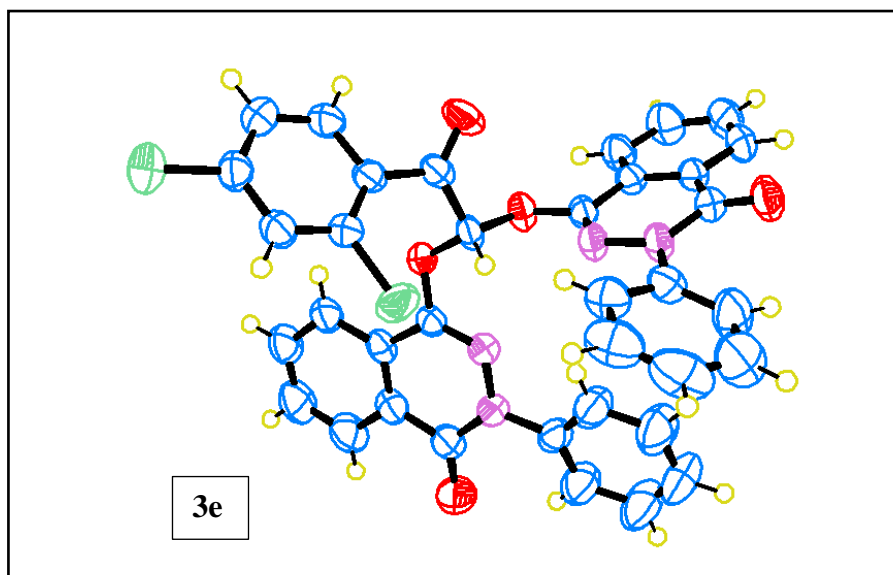

**Figure S2.** ORTEP diagram of X-ray crystal structure of compounds **3e** (CCDC No. **2103980**). The ellipsoid contour percent probability level is 60%. Color code: red, oxygen; pink, nitrogen; green, chlorine; blue, carbon; yellow, hydrogen. The crystal was grown from ethyl acetate. 33 mg of **3e** was dissolved in 0.5 mL of ethyl acetate under heating and the saturated solution was kept in open air for evaporated slowly to get crystal.

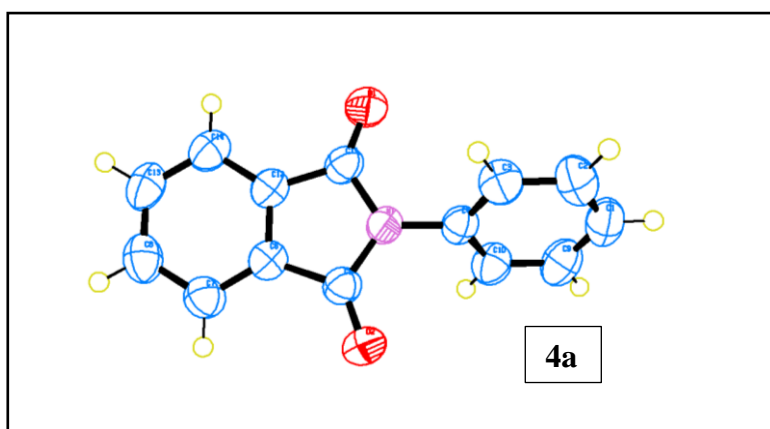

**Figure S3.** ORTEP diagram of X-ray crystal structure of compounds **4a** (CCDC No. **2103983**). The ellipsoid contour percent probability level is 60%. Color code: red, oxygen; pink, nitrogen; blue, carbon; yellow, hydrogen. The crystal was grown from ethyl acetate. 30 mg of **4a** was dissolved in 0.5 mL of ethyl acetate under heating and the solvent was evaporated slowly in a cold atmosphere.

**Single crystal X-ray data of compound 3b (CCDC 2103982), 3e (CCDC 2103980) and 4a (CCDC 2103983):**

Single crystals suitable for X-ray diffraction of **3b**, **3e** and **4a** were grown from ethyl acetate. The crystals were carefully chosen using a stereo zoom microscope supported by a rotatable polarizing stage. The data were collected at 273(2) K, 273(2) K and 296(2) K for **3b**, **3e** and **4a** on a Bruker-APEX III CCD diffractometer with graphite monochromated Mo-K $\alpha$  radiation (0.71073Å). The data were processed using the package SAINT.<sup>1</sup> Structures were solved by direct and Fourier methods and refined by full-matrix least squares based on F2 using SHELXTL<sup>2</sup> and SHELXL-97<sup>3</sup> packages.

**Table 1:** Crystallographic data for the compound **3b**, **3e** and **4a**.

| <b>Compounds</b>               | <b>3b</b>                                                        | <b>3e</b>                                                                     | <b>4a</b>                                       |
|--------------------------------|------------------------------------------------------------------|-------------------------------------------------------------------------------|-------------------------------------------------|
| <b>Empirical formula</b>       | C <sub>36</sub> H <sub>23</sub> Br N <sub>4</sub> O <sub>5</sub> | C <sub>36</sub> H <sub>22</sub> Cl <sub>2</sub> N <sub>4</sub> O <sub>5</sub> | C <sub>14</sub> H <sub>9</sub> N O <sub>2</sub> |
| <b>FW</b>                      | 671.49                                                           | 661.47                                                                        | 223.22                                          |
| <b>Crystal color</b>           | White                                                            | White                                                                         | White                                           |
| <b>Crystal system</b>          | Monoclinic                                                       | Triclinic                                                                     | Orthorhombic                                    |
| <b>Space group</b>             | P 21/n                                                           | P -1                                                                          | P b c a                                         |
| <b>a (Å)</b>                   | 13.543(3)                                                        | 8.346(4)                                                                      | 11.6817(8)                                      |
| <b>b (Å)</b>                   | 10.328(2)                                                        | 12.269(6)                                                                     | 7.6497(6)                                       |
| <b>c (Å)</b>                   | 22.564(5)                                                        | 14.899(7)                                                                     | 23.7774(16)                                     |
| <b><math>\alpha</math> (°)</b> | 90                                                               | 92.200(7)                                                                     | 90                                              |
| <b><math>\beta</math> (°)</b>  | 100.723(4)                                                       | 101.408(7)                                                                    | 90                                              |
| <b><math>\gamma</math> (°)</b> | 90                                                               | 92.387(7)                                                                     | 90                                              |
| <b>V (Å<sup>3</sup>)</b>       | 3101.0(12)                                                       | 1492.5(13)                                                                    | 2124.8(3)                                       |
| <b>Z</b>                       | 4                                                                | 2                                                                             | 8                                               |
| <b>T, K</b>                    | 273(2)                                                           | 273(2)                                                                        | 296(2)                                          |

|                                                                                |               |               |               |
|--------------------------------------------------------------------------------|---------------|---------------|---------------|
| <b>Wavelength (Å)</b>                                                          | 0.71073       | 0.71073       | 0.71073       |
| <b>2θ (°)</b>                                                                  | 1.837-24.996  | 1.396-24.999  | 1.713-24.992  |
| <b>μ (mm<sup>-1</sup>)</b>                                                     | 1.376         | 0.271         | 0.095         |
| <b>ρ<sub>calcd</sub> (g cm<sup>-3</sup>)</b>                                   | 1.438         | 1.472         | 1.396         |
| <b>F(000)</b>                                                                  | 1368          | 680           | 928.0         |
| <b>absorption correction</b>                                                   | multi-scan    | multi-Scan    | multi-Scan    |
| <b>index ranges</b>                                                            | -16 ≤ h ≤ 16  | -9 ≤ h ≤ 9    | -13 ≤ h ≤ 13  |
|                                                                                | -12 ≤ k ≤ 12  | -14 ≤ k ≤ 14  | -8 ≤ k ≤ 9    |
|                                                                                | -26 ≤ l ≤ 26  | -17 ≤ l ≤ 17  | -28 ≤ l ≤ 28  |
| <b>reflections collected</b>                                                   | 44463         | 30198         | 20151         |
| <b>independent reflections (R<sub>int</sub>)</b>                               | 889 (0.0785)  | 5760 (0.0359) | 7530(0.0310)  |
| <b>Goodness-of-fit on F<sup>2</sup></b>                                        | 1.143         | 1.011         | 0.936         |
| <b>R<sub>1</sub><sup>a</sup>/wR<sub>2</sub><sup>b</sup><br/>(I &gt; 2σ(I))</b> | 0.0509/0.1373 | 0.0431/0.1278 | 0.0310/0.1088 |
| <b>R<sub>1</sub><sup>a</sup>/wR<sub>2</sub><sup>b</sup> (for all data)</b>     | 0.0991/0.1749 | 0.0570/0.1600 | 0.0358/0.1199 |
| <b>Largest diff. peak/hole / e Å<sup>-3</sup></b>                              | 0.410/ -0.533 | 0.236/ -0.416 | 0.179/ -0.126 |

$${}^aR_1 = [\sum||F_o| - |F_c||/\sum|F_o|]. \quad {}^b wR_2 = [\sum w(F_o^2 - F_c^2)^2/\sum wF_o^4]^{1/2}$$

## References:

1. *APEX-II, SAINT-Plus, and TWINABS*; Bruker-NoniusAXS Inc.: Madison, WI, 2004.
2. *SHELXTL*, version 6.10; Bruker AXS Inc.: Madison, WI, 2002.
3. Sheldrick, G. M. *SHELXL-9, Crystal Structure Refinement Program*; University of Göttingen: Göttingen, Germany, 1997.
4. Dolomanov, O.V., Bourhis, L.J., Gildea, R.J, Howard, J.A.K. & Puschmann, H. (2009), *J. Appl. Cryst.* 42, 339-341.
5. Sheldrick, G.M. (2015). *Acta Cryst.* A71, 3-8.
6. Sheldrick, G.M. (2015). *Acta Cryst.* C71, 3-8.

### Gram scale experiment for compound 4a:

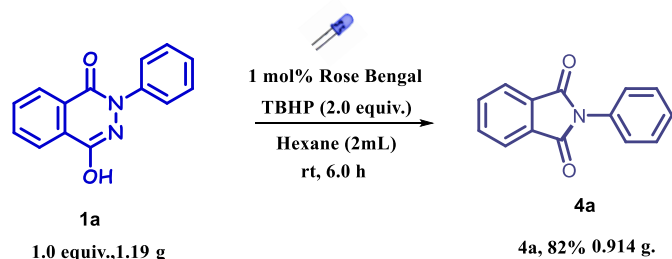

To a flame dried glass tube fitted with a screw-cap and a magnetic stir bar were added dihydrophthalazine-1,4-diones **1a** (1.19 g, 5 mmol; 1 equiv.) in 2 mL of hexane. Then TBHP in 70% in water (~1.8 mL; 10 mmol) was added dropwise to the above mixture. After the addition of TBHP, the reaction mixture was stirred at room temperature under the irradiation by 2\*9 W blue LED for 6 h. The reaction was monitored by TLC. After the mentioned time interval, the mixture was extracted using ethyl acetate (5 × 10 mL) and brine solution (10 mL). The combined organic layer was then dried over anhydrous sodium sulphate, evaporated under reduced pressure and finally purified by silica gel column chromatography (100–200 mesh size) to obtain the pure products (**4a**) with 82% (0.914 g). The identity and purity of the product was confirmed by spectroscopic analysis.

### Deprotection study of ether linkage:

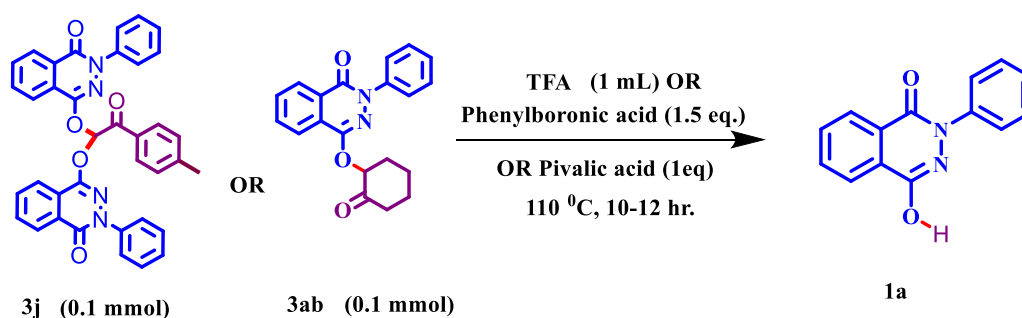

In an oven dried 15 mL pressure tube, to a solution of **3j/3ab**, TFA (Trifluoroacetic acid) (1 mL) or phenylboronic acid (1.5 eq.) or pivalic acid (1 eq.) were added and the reaction mixture was stirred in a pressure tube sealed with a Teflon cap at 115 °C for 10-12 h. After completion of reaction, the solution was then extracted with ethyl acetate (2\*15 mL) and saturated aqueous

solutions of NaCl (5 mL) and NaHCO<sub>3</sub> (5 mL). The combined organic layer was dried over anhydrous Na<sub>2</sub>SO<sub>4</sub>, filtered, and concentrated using rotary evaporator. The crude residue was finally subjected to silica gel column chromatography using EA/ petroleum ether as eluent to get the desired product **1a** with 72%.

### Alkenylation reaction:

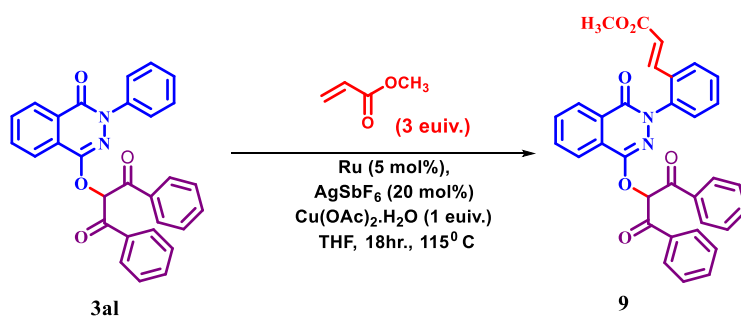

In an oven dried 15 mL pressure tube, to a solution of 2-((4-oxo-3-phenyl-3,4-dihydrophthalazin-1-yl)oxy)-1,3-diphenylpropane-1,3-dione **3al** (0.2 mmol, 1 eq.) and methyl acrylate (0.6 mmol, 3 eq.) in THF (1.5 mL) were added the combined solids: [RuCl<sub>2</sub>(p-cymene)]<sub>2</sub> (5 mol%), AgSbF<sub>6</sub> (20 mol%) and Cu(OAc)<sub>2</sub>.H<sub>2</sub>O (0.1 mmol, 1 eq.). After that the pressure tube was sealed with a Teflon cap then it was heated to 115 °C for 18 h. After completion of reaction, the solution was then extracted with ethyl acetate (2\*15 mL) and saturated aqueous solutions of NaCl (10 mL). The combined organic layer was dried over anhydrous Na<sub>2</sub>SO<sub>4</sub>, filtered, and concentrated using rotary evaporator. The crude residue was finally subjected to silica gel column chromatography using EA/ petroleum ether as eluent to get the desired product.



**HRMS analysis of reaction mixture (RM-1) after 5hr. of oxidative C(sp<sup>3</sup>)-O cross Coupling reaction of 2,3-dihydrophthalazine-1,4-diones (1a) with 4-bromo acetophenone (2b):**

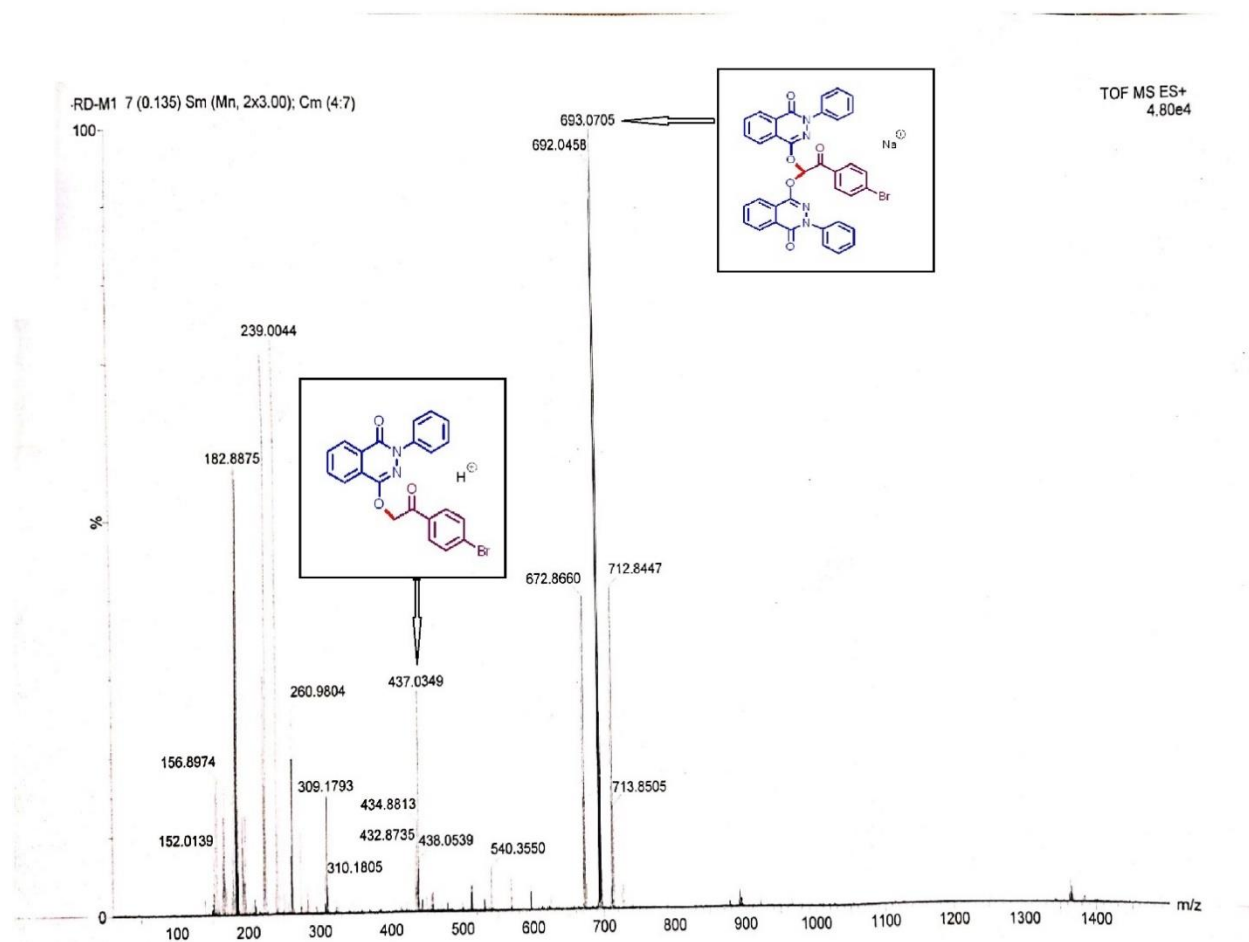

# HRMS analysis of reaction mixture (RM-2) of TBHP-mediated ring contraction:

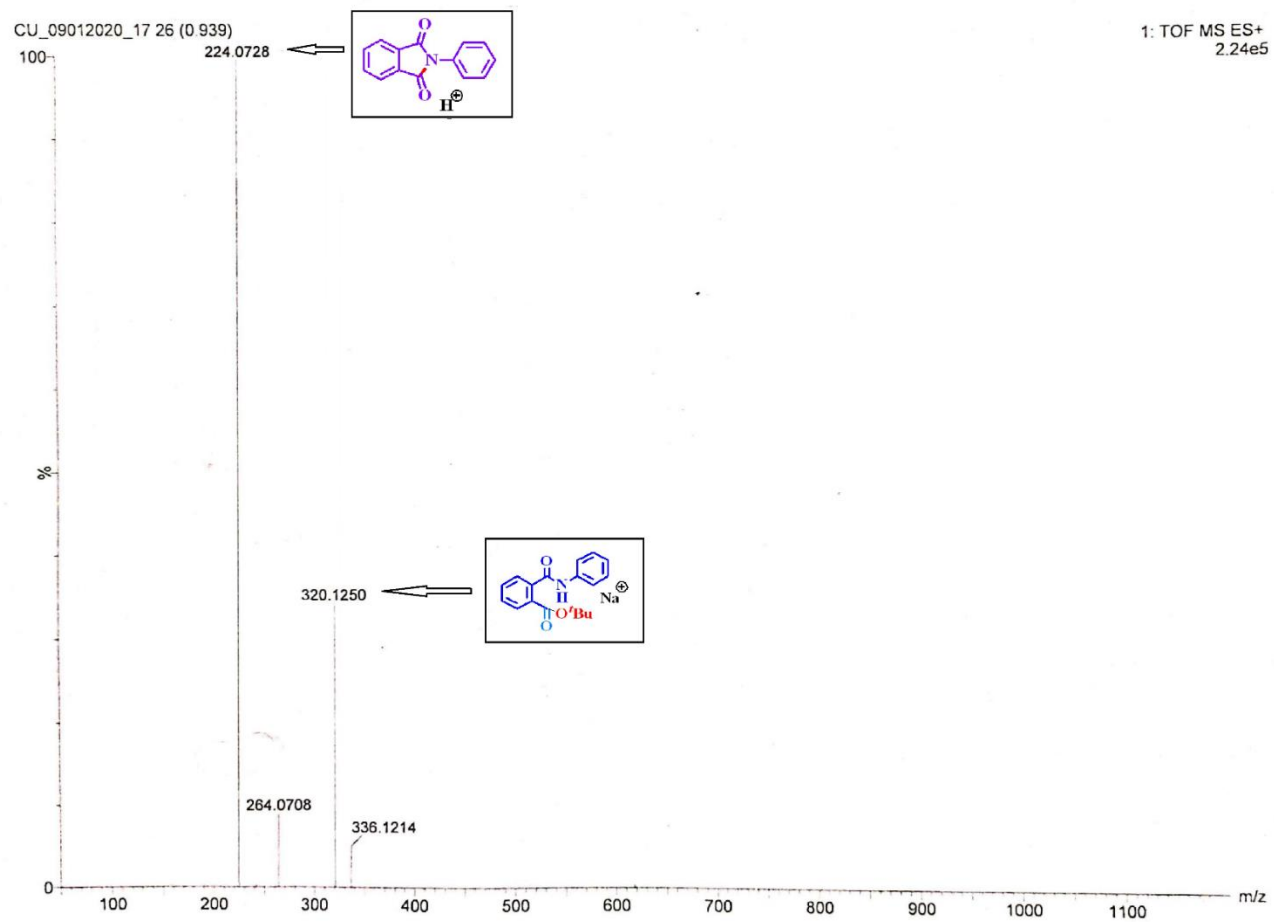

4,4'-((2-oxo-2-phenylethane-1,1-diyl)bis(oxy))bis(2-phenylphthalazin-1(2H)-one) (3a):  $^1\text{H}$  NMR (300 MHz,  $\text{CDCl}_3$ ):

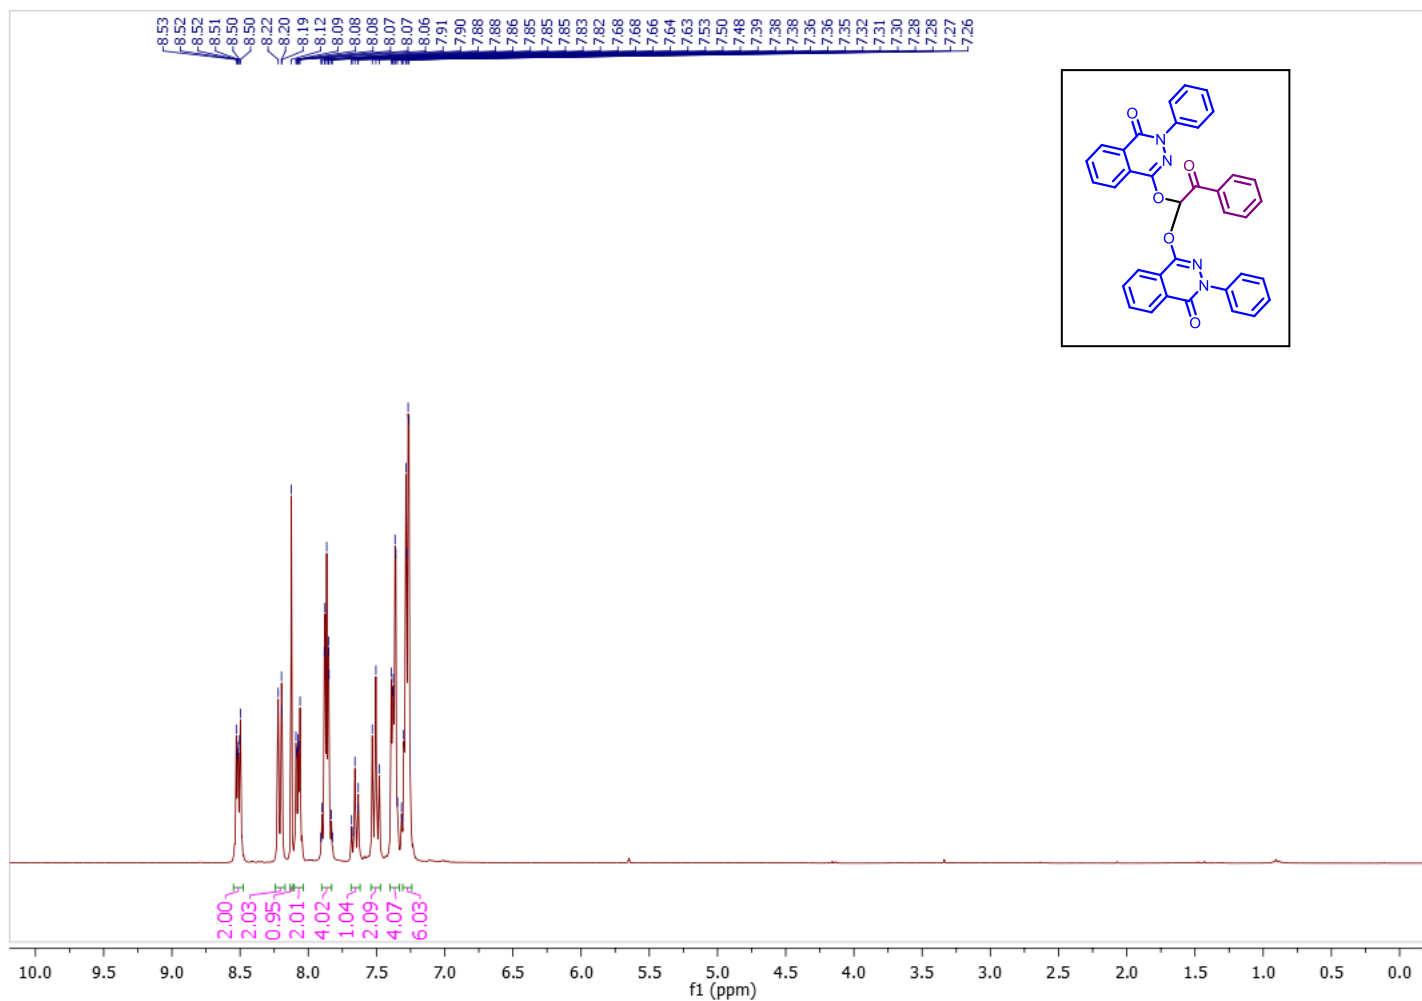

4,4'-((2-oxo-2-phenylethane-1,1-diyl)bis(oxy))bis(2-phenylphthalazin-1(2H)-one) (3a):  $^{13}\text{C}$  NMR (75 MHz,  $\text{CDCl}_3$ ) :

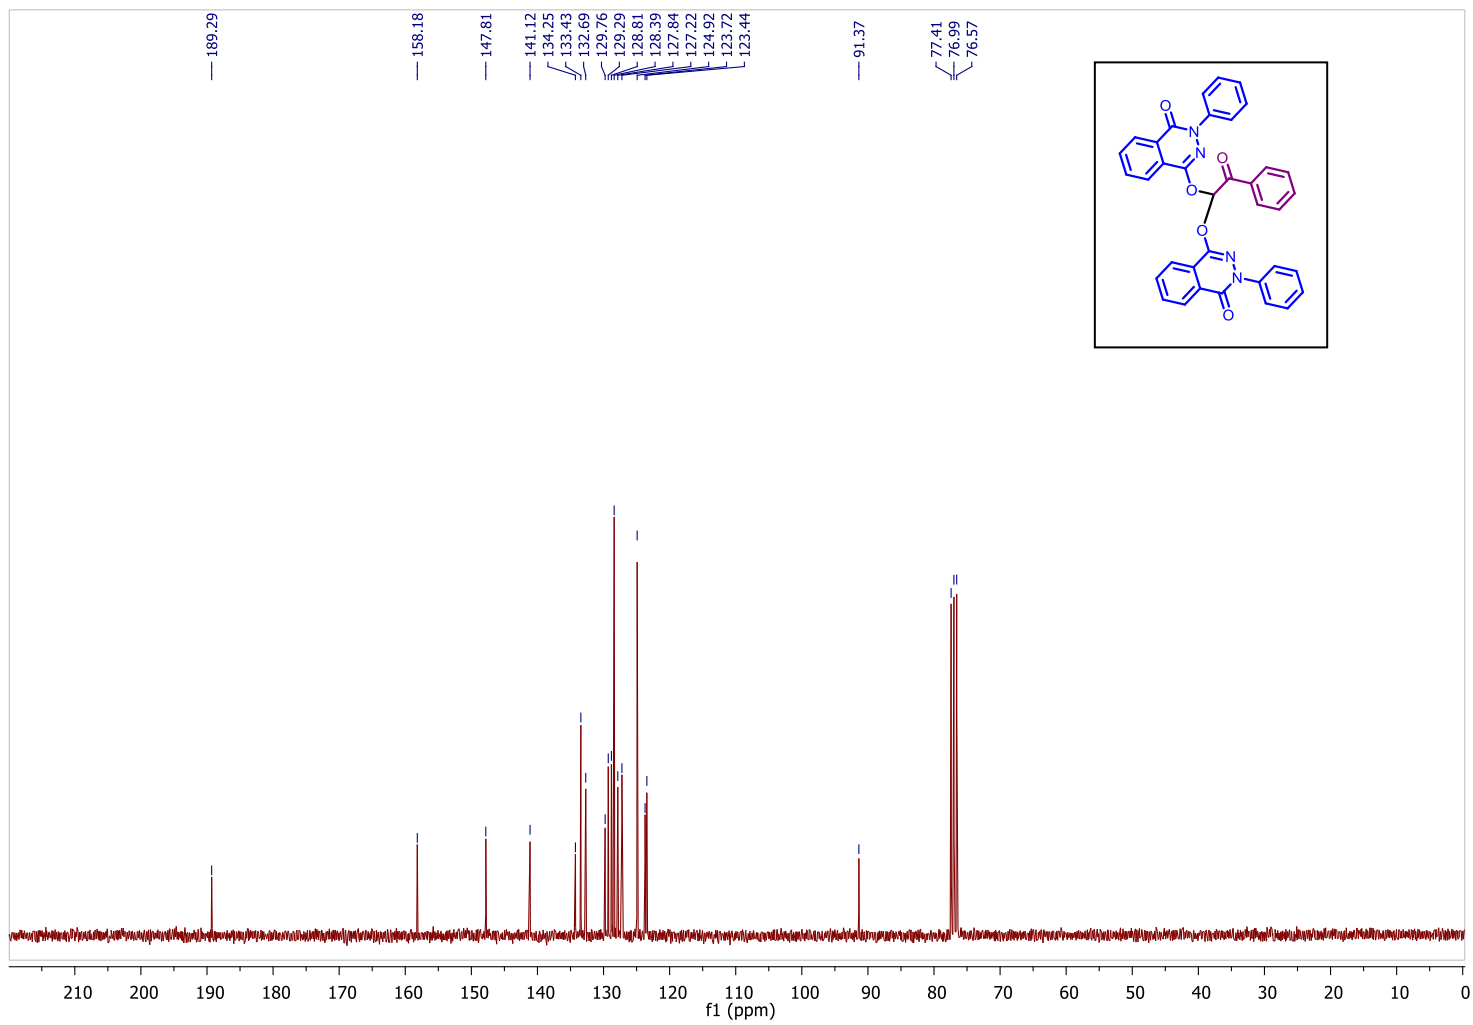

4,4'-((2-(4-bromophenyl)-2-oxoethane-1,1 diyl)bis(oxy))bis(2phenylphthalazin-1(2H) one) (3b):  $^1\text{H}$  NMR (300 MHz,  $\text{CDCl}_3$ ) :

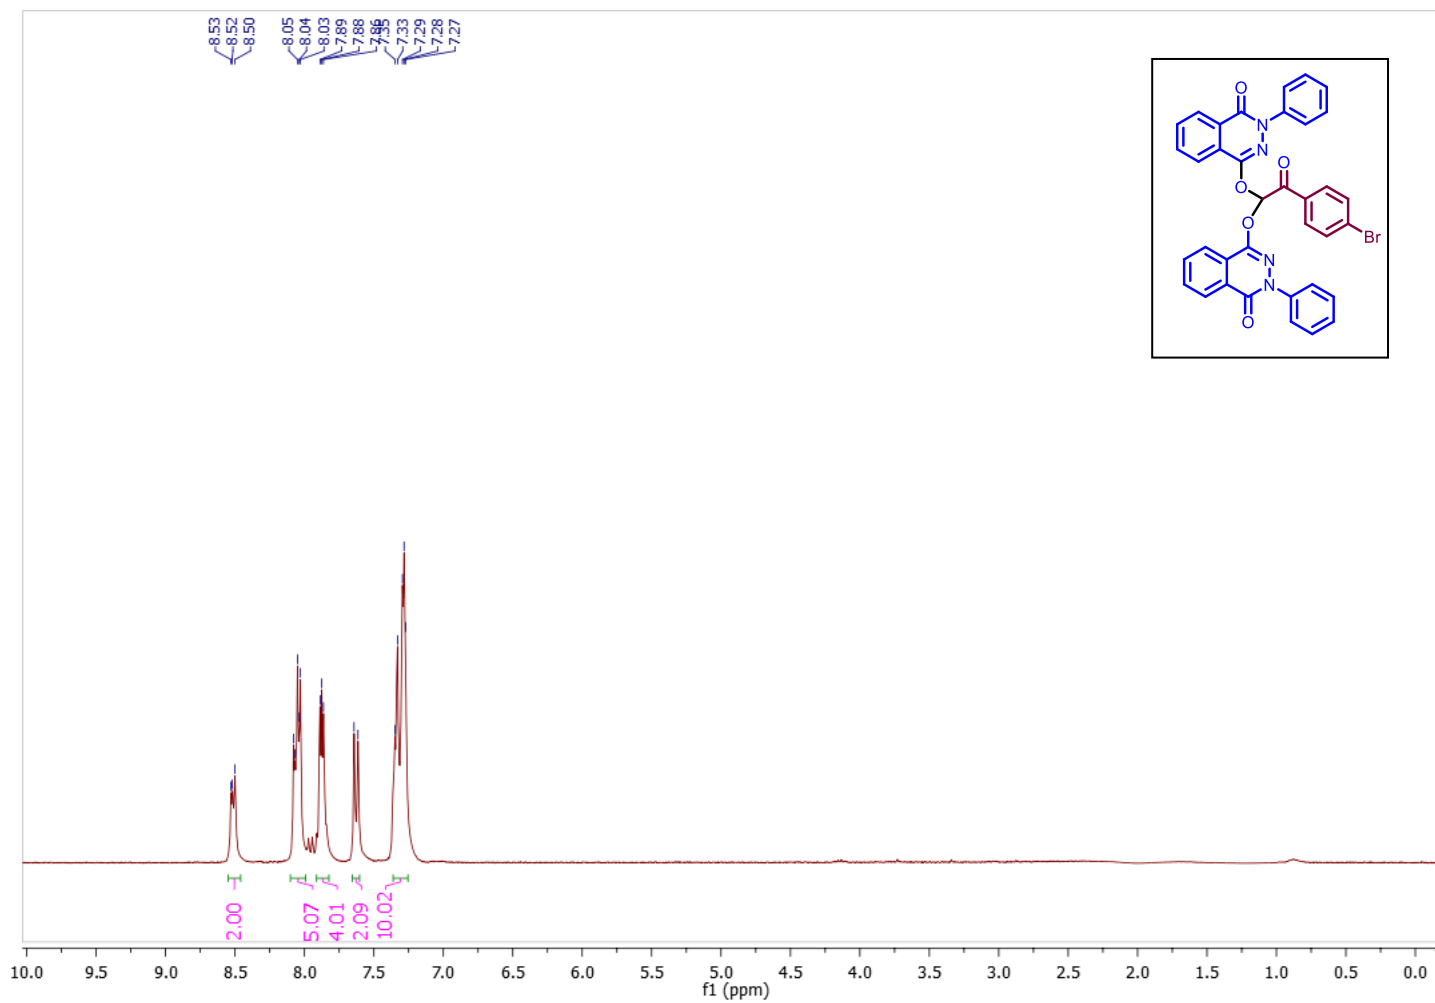

4,4'-((2-(4-bromophenyl)-2-oxoethane-1,1 diyl)bis(oxy))bis(2phenylphthalazin-1(2H) one) (3b):  $^{13}\text{C}$  NMR (75 MHz,  $\text{CDCl}_3$ ):

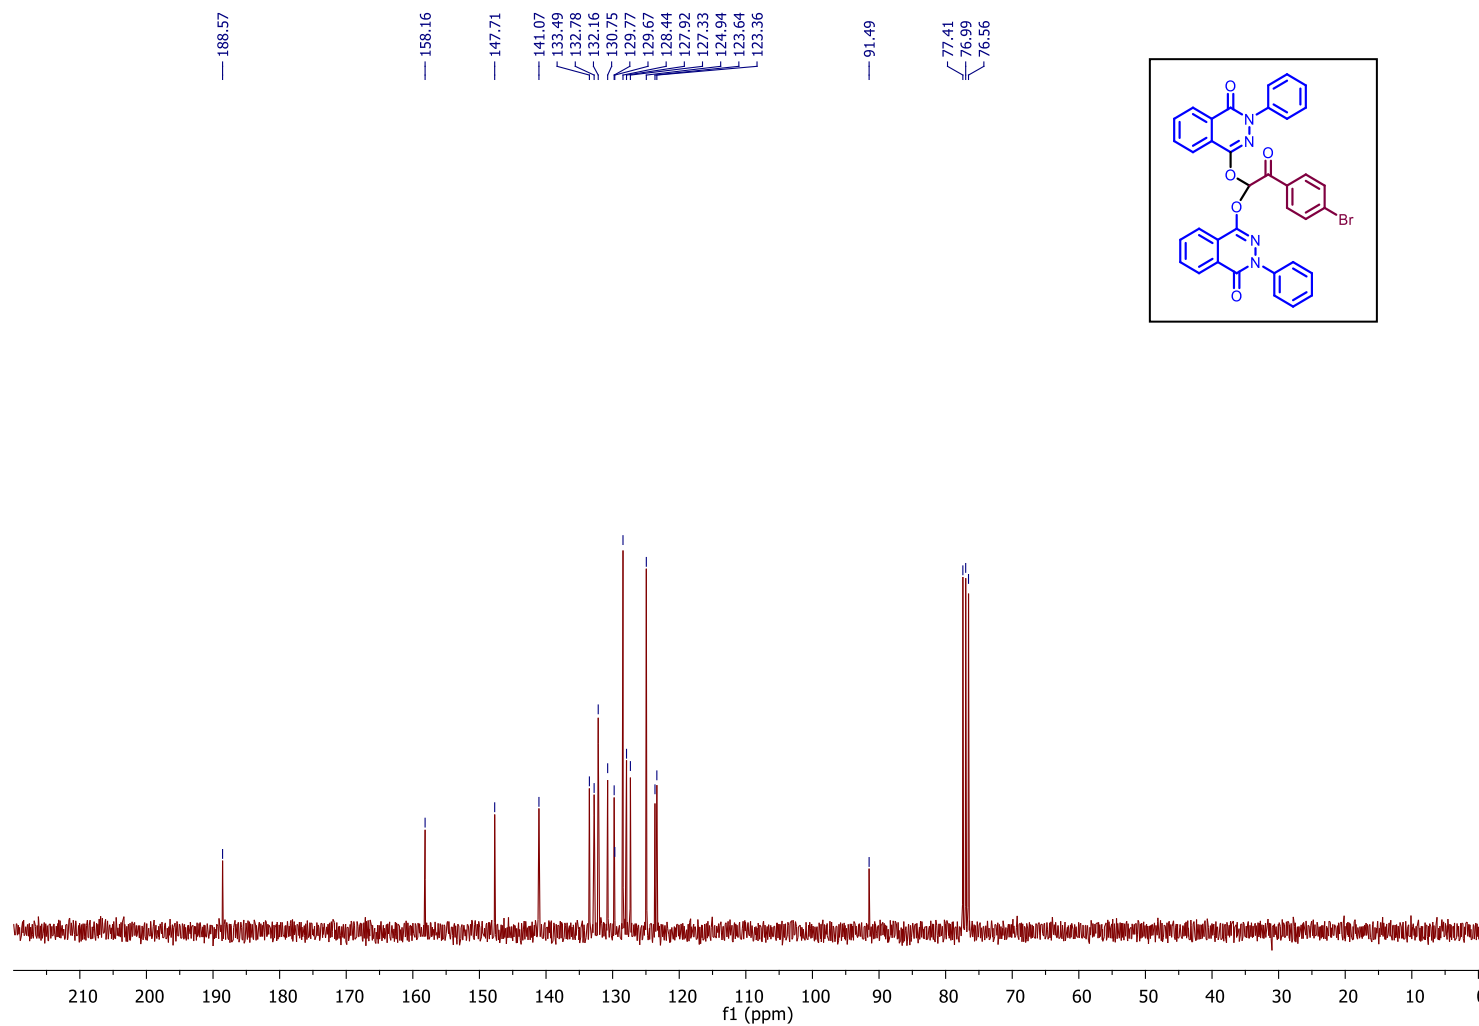

4,4'-((2-(4-fluorophenyl)-2-oxoethane-1,1-diyl)bis(oxy))bis(2-phenylphthalazin-1(2H)-one) (3c): <sup>1</sup>H NMR (300 MHz, CDCl<sub>3</sub>):

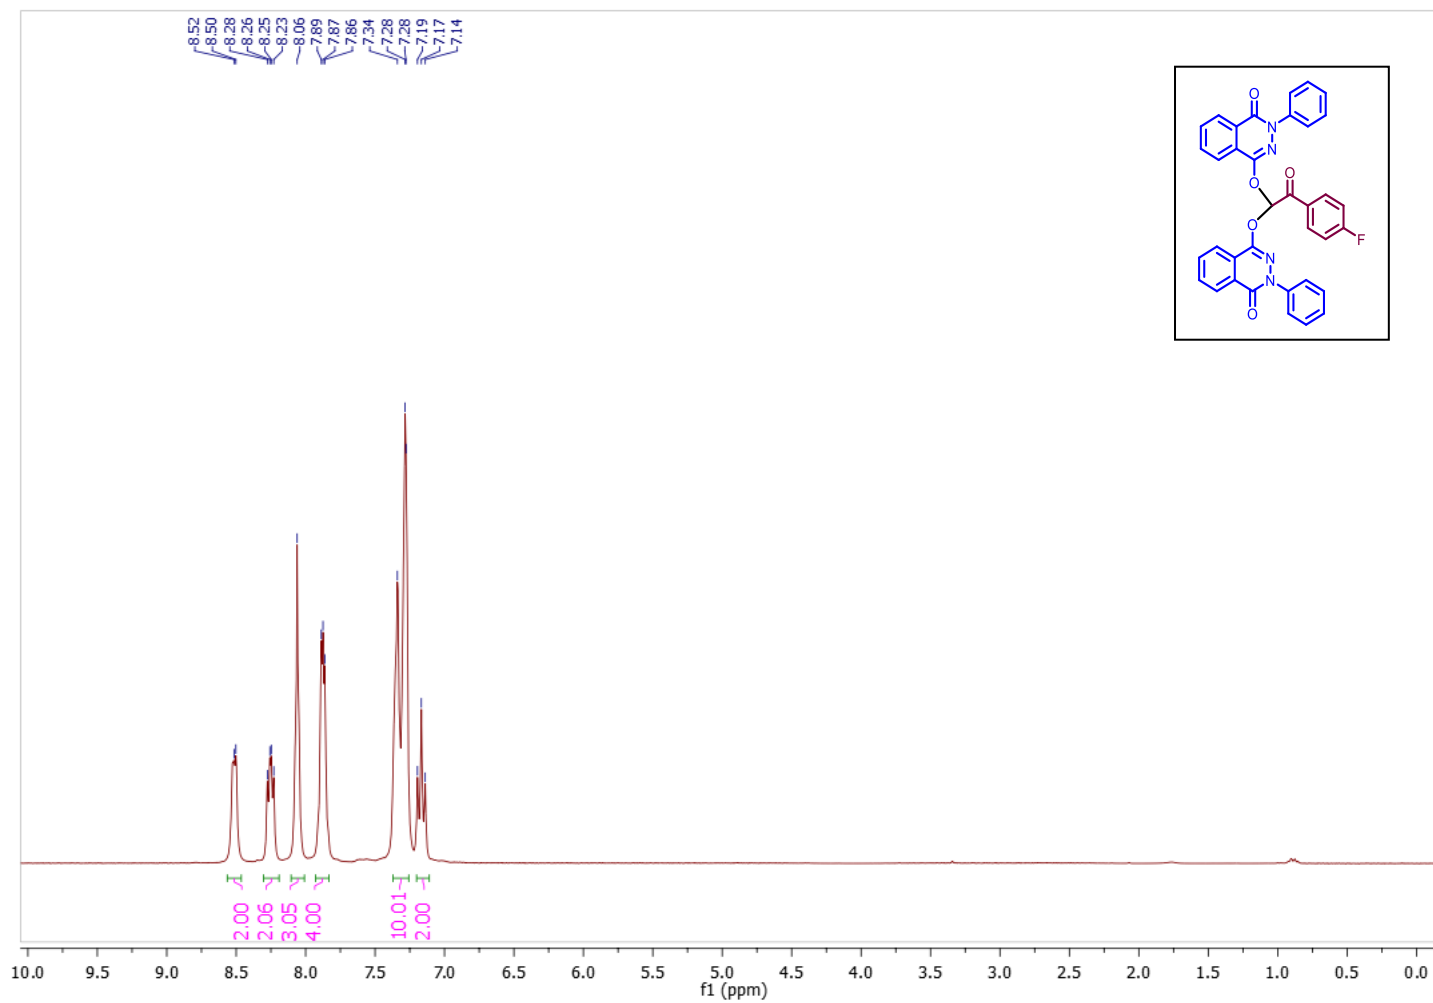

**4,4'-((2-(4-fluorophenyl)-2-oxoethane-1,1-diyl)bis(oxy))bis(2-phenylphthalazin-1(2H)-one) (3c): <sup>13</sup>C NMR (75 MHz, CDCl<sub>3</sub>):**

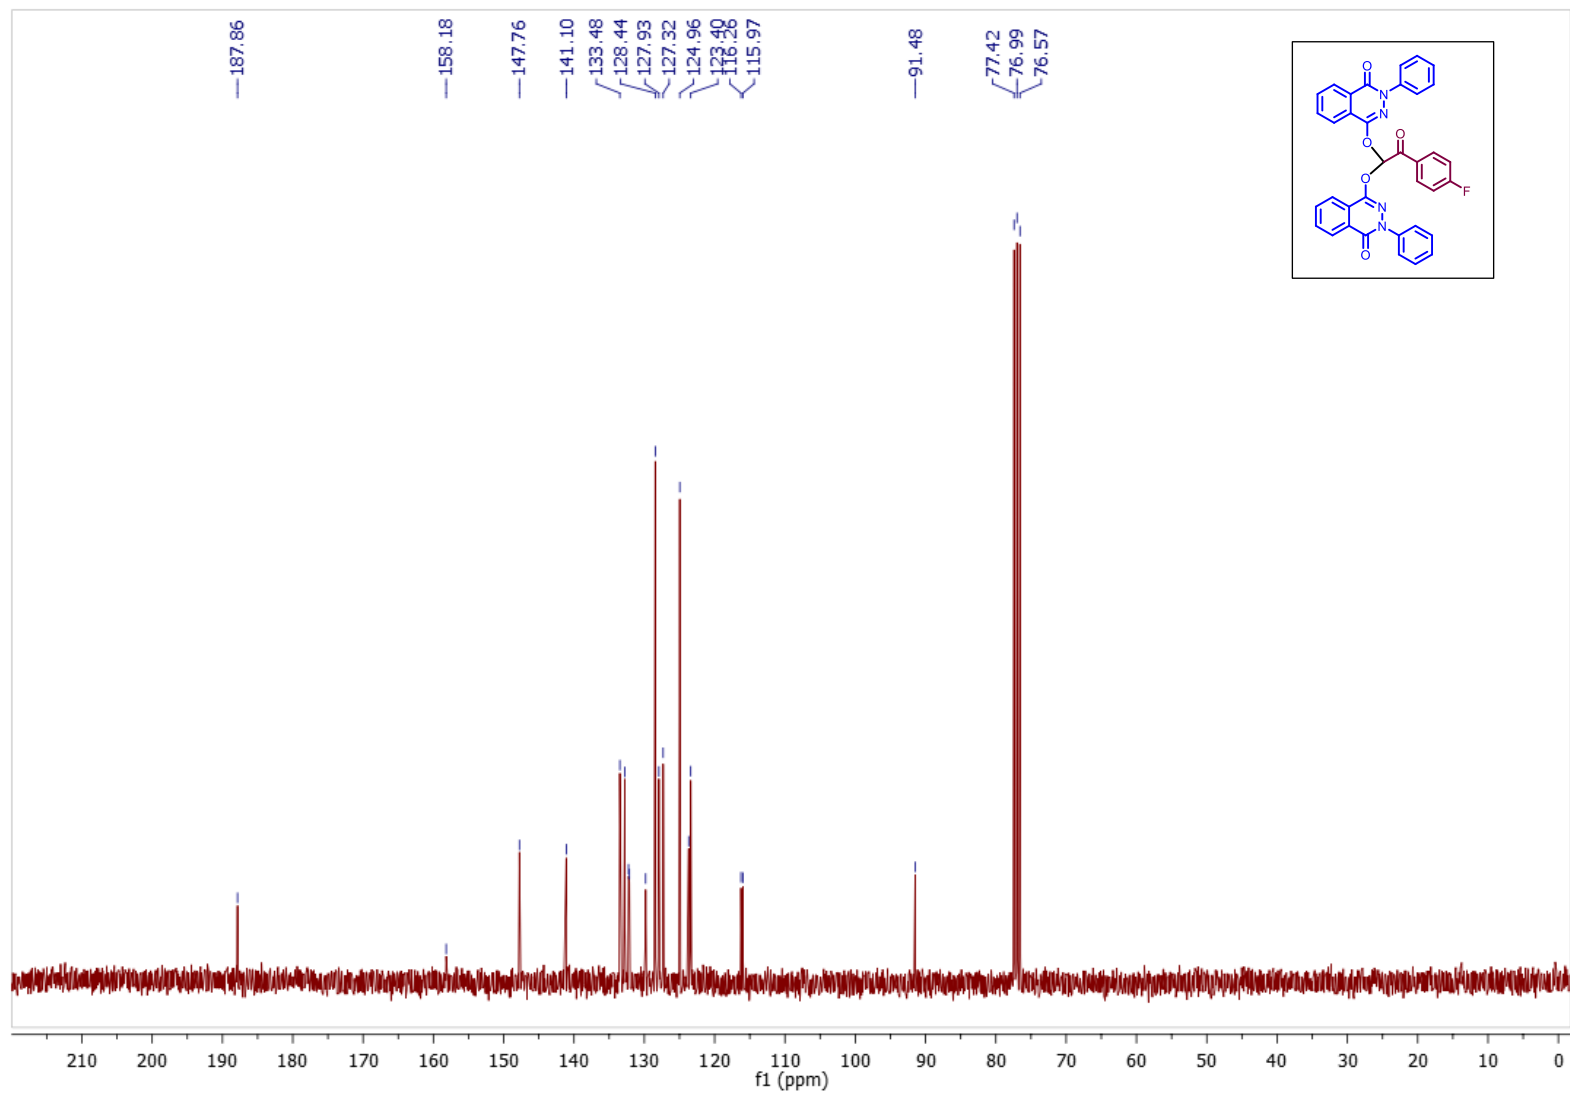



4,4'-((2-(4-chlorophenyl)-2-oxoethane-1,1-diyl)bis(oxy))bis(2-phenylphthalazin-1(2H)-one) (3d): <sup>1</sup>H NMR (300 MHz, CDCl<sub>3</sub>):

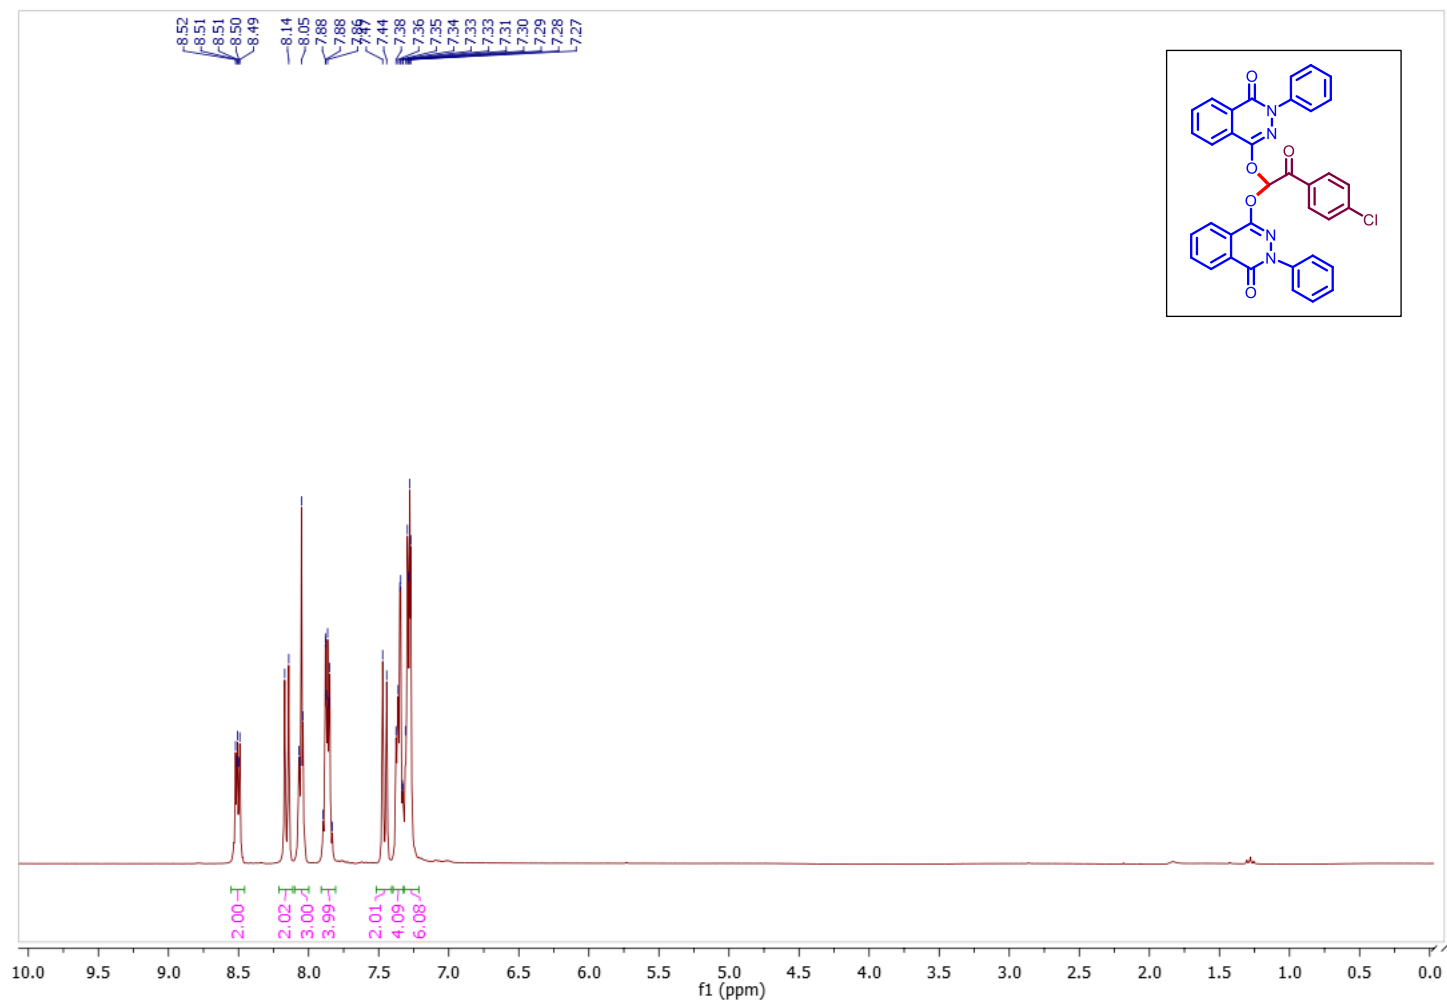

4,4'-((2-(4-chlorophenyl)-2-oxoethane-1,1-diyl)bis(oxy))bis(2-phenylphthalazin-1(2H)-one) (3d):  $^{13}\text{C}$  NMR (75 MHz,  $\text{CDCl}_3$ ):

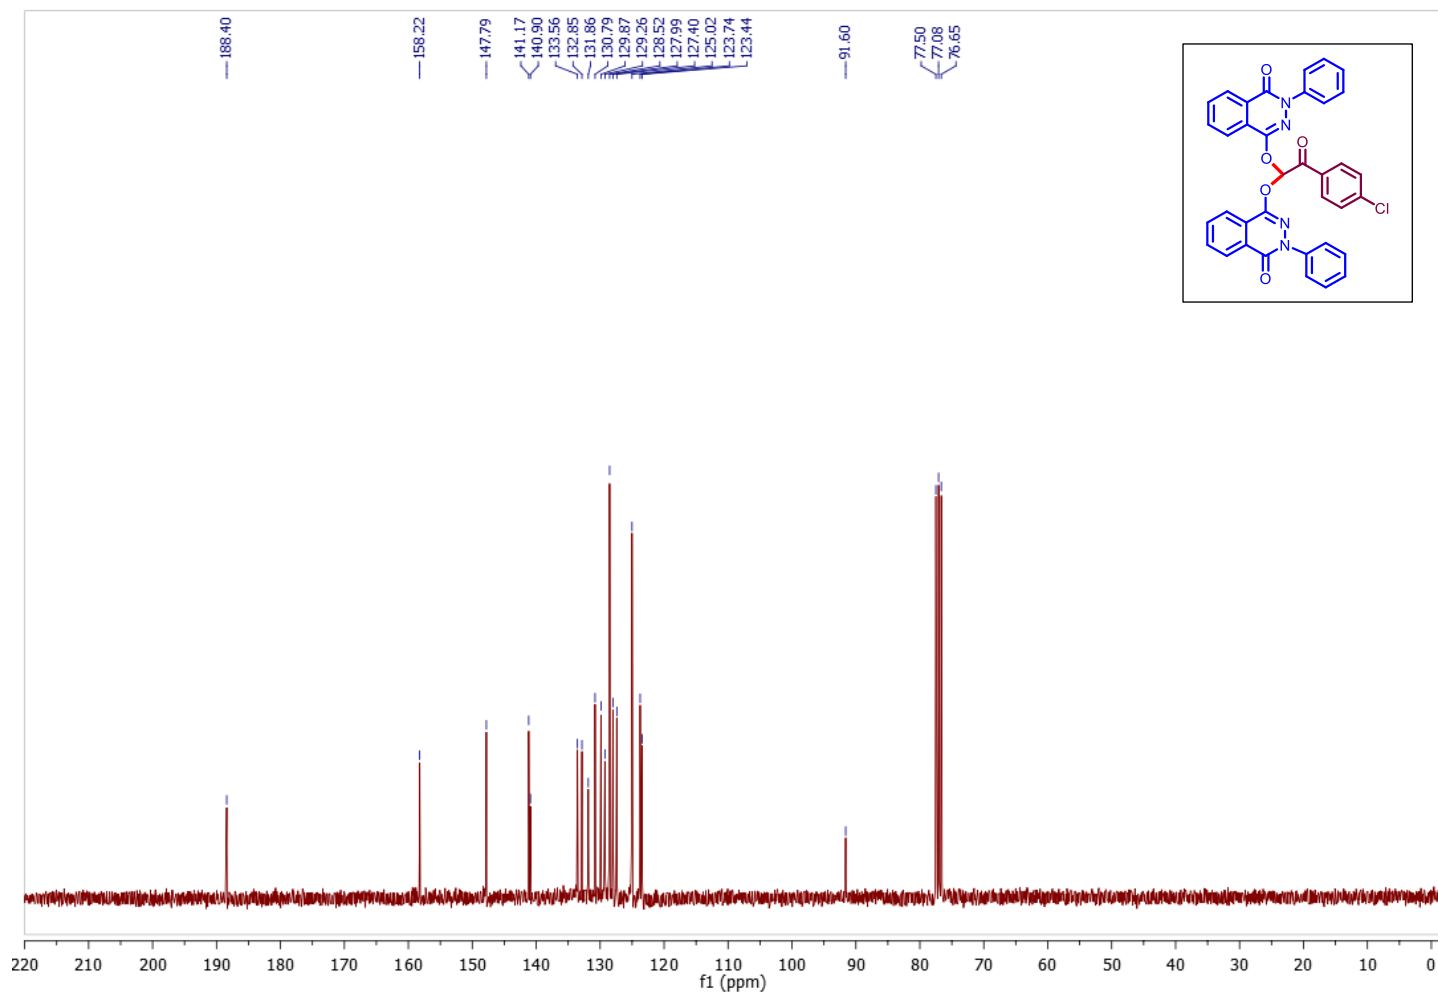

4,4'-((2-(2,4-dichlorophenyl)-2-oxoethane-1,1-diyl)bis(oxy))bis(2 phenylphthalazin-1(2H)-one) (3e): <sup>1</sup>H NMR (300 MHz, CDCl<sub>3</sub>):

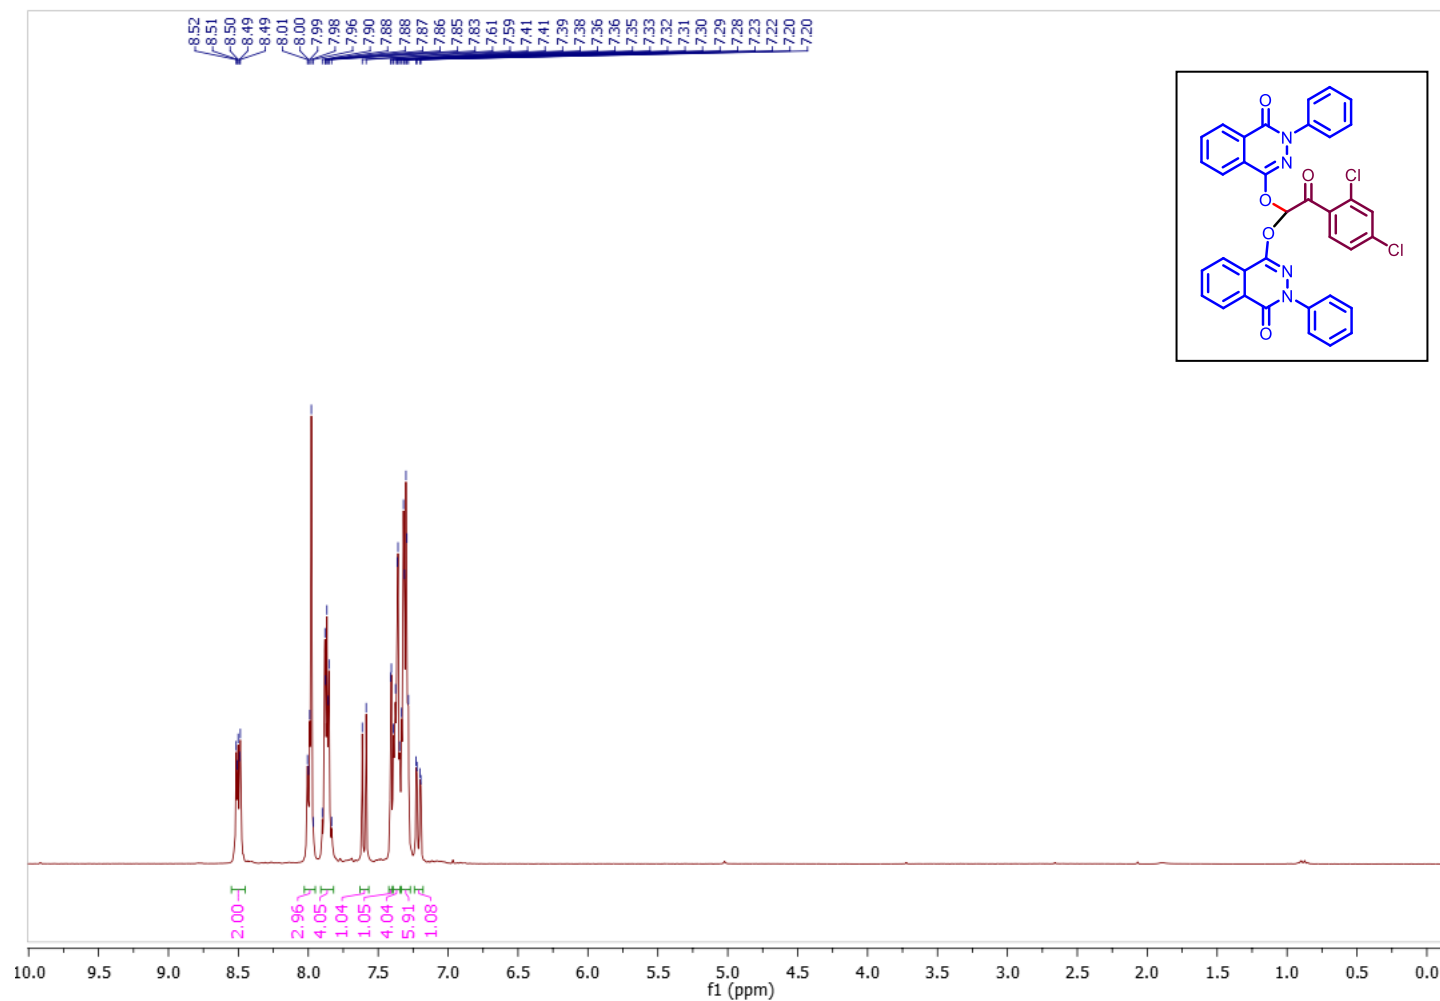

4,4'-((2-(2,4-dichlorophenyl)-2-oxoethane-1,1-diyl)bis(oxy))bis(2 phenylphthalazin-1(2H)-one) (3e):  $^{13}\text{C}$  NMR (75 MHz,  $\text{CDCl}_3$ ):

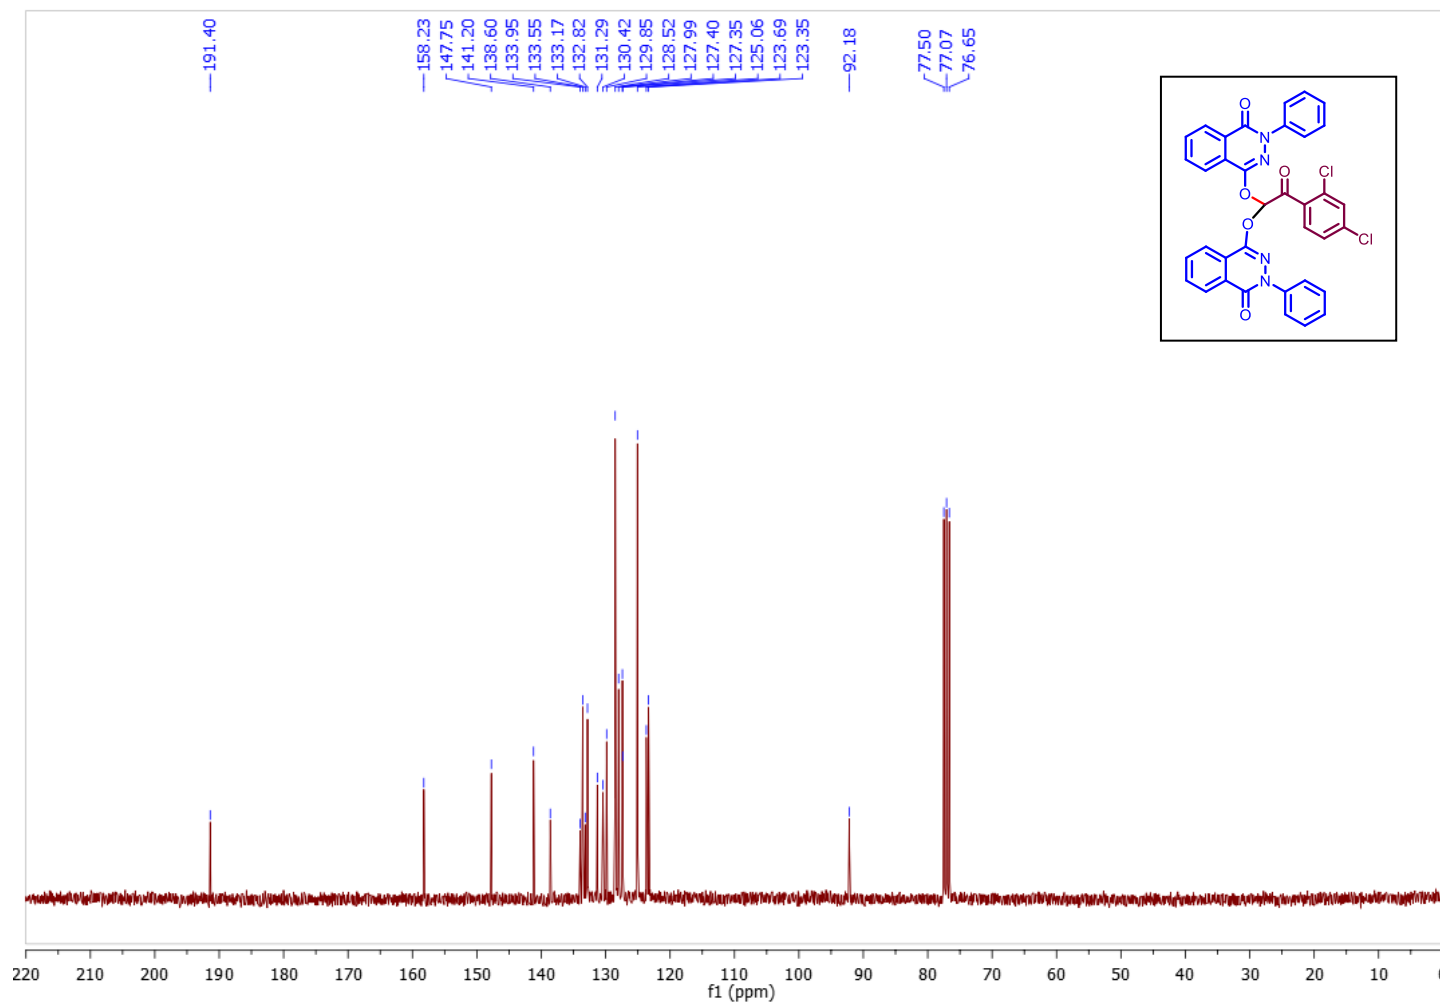

4,4'-((2-(4-nitrophenyl)-2-oxoethane-1,1-diyl)bis(oxy))bis(2-phenylphthalazin-1(2H)-one) (3f): <sup>1</sup>H NMR (300 MHz, CDCl<sub>3</sub>):

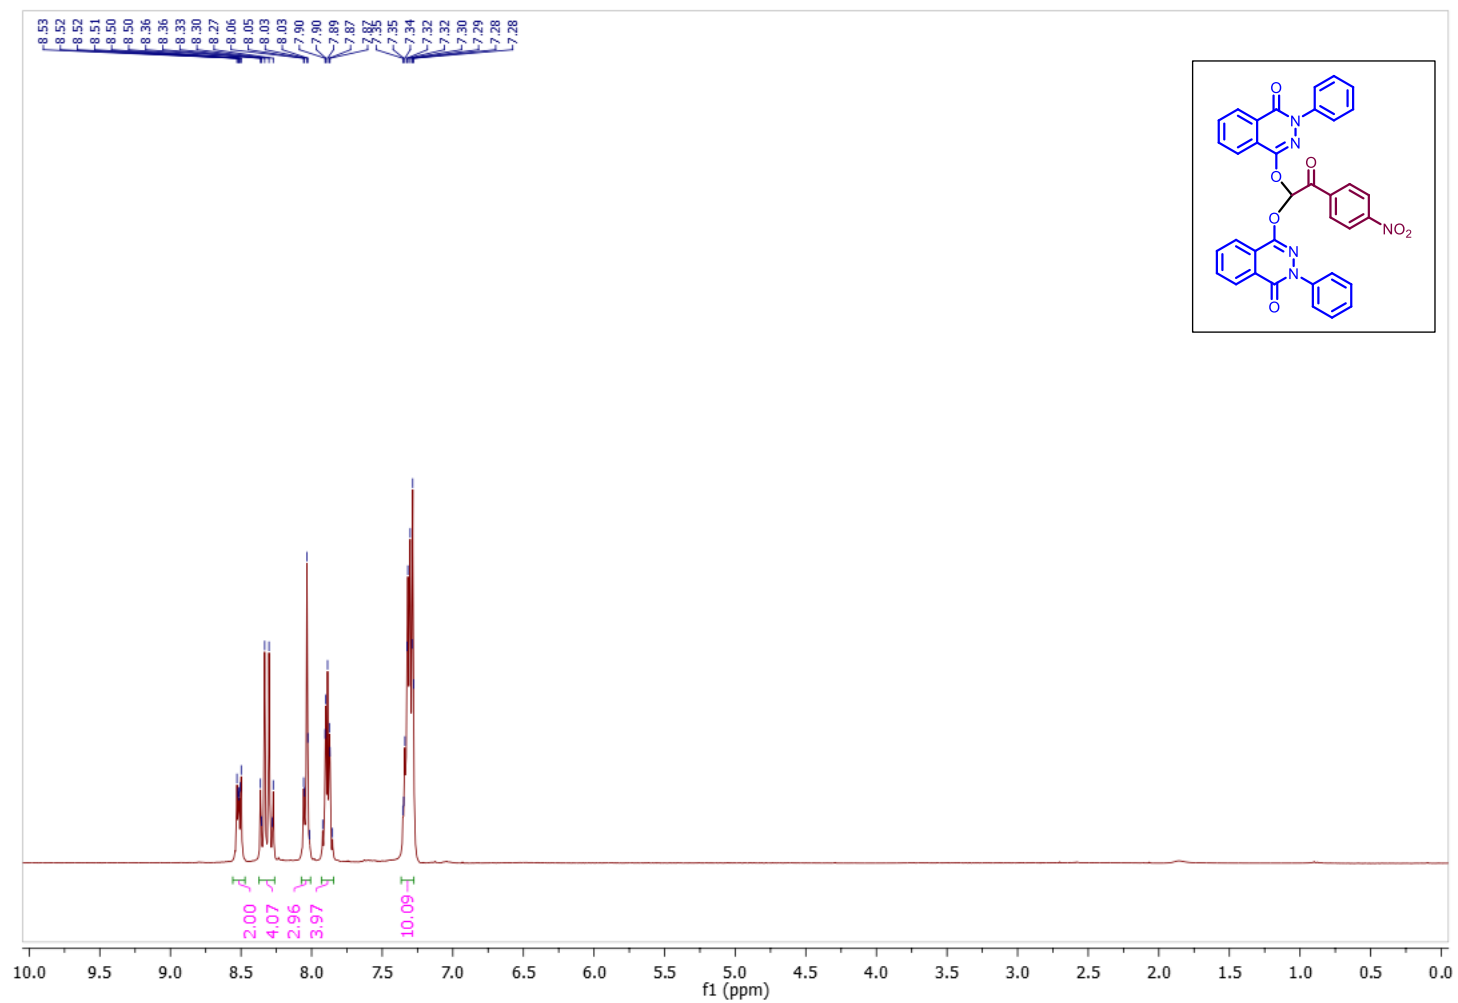

4,4'-((2-(4-nitrophenyl)-2-oxoethane-1,1-diyl)bis(oxy))bis(2-phenylphthalazin-1(2H)-one) (3f):  $^{13}\text{C}$  NMR (75 MHz,  $\text{CDCl}_3$ ):

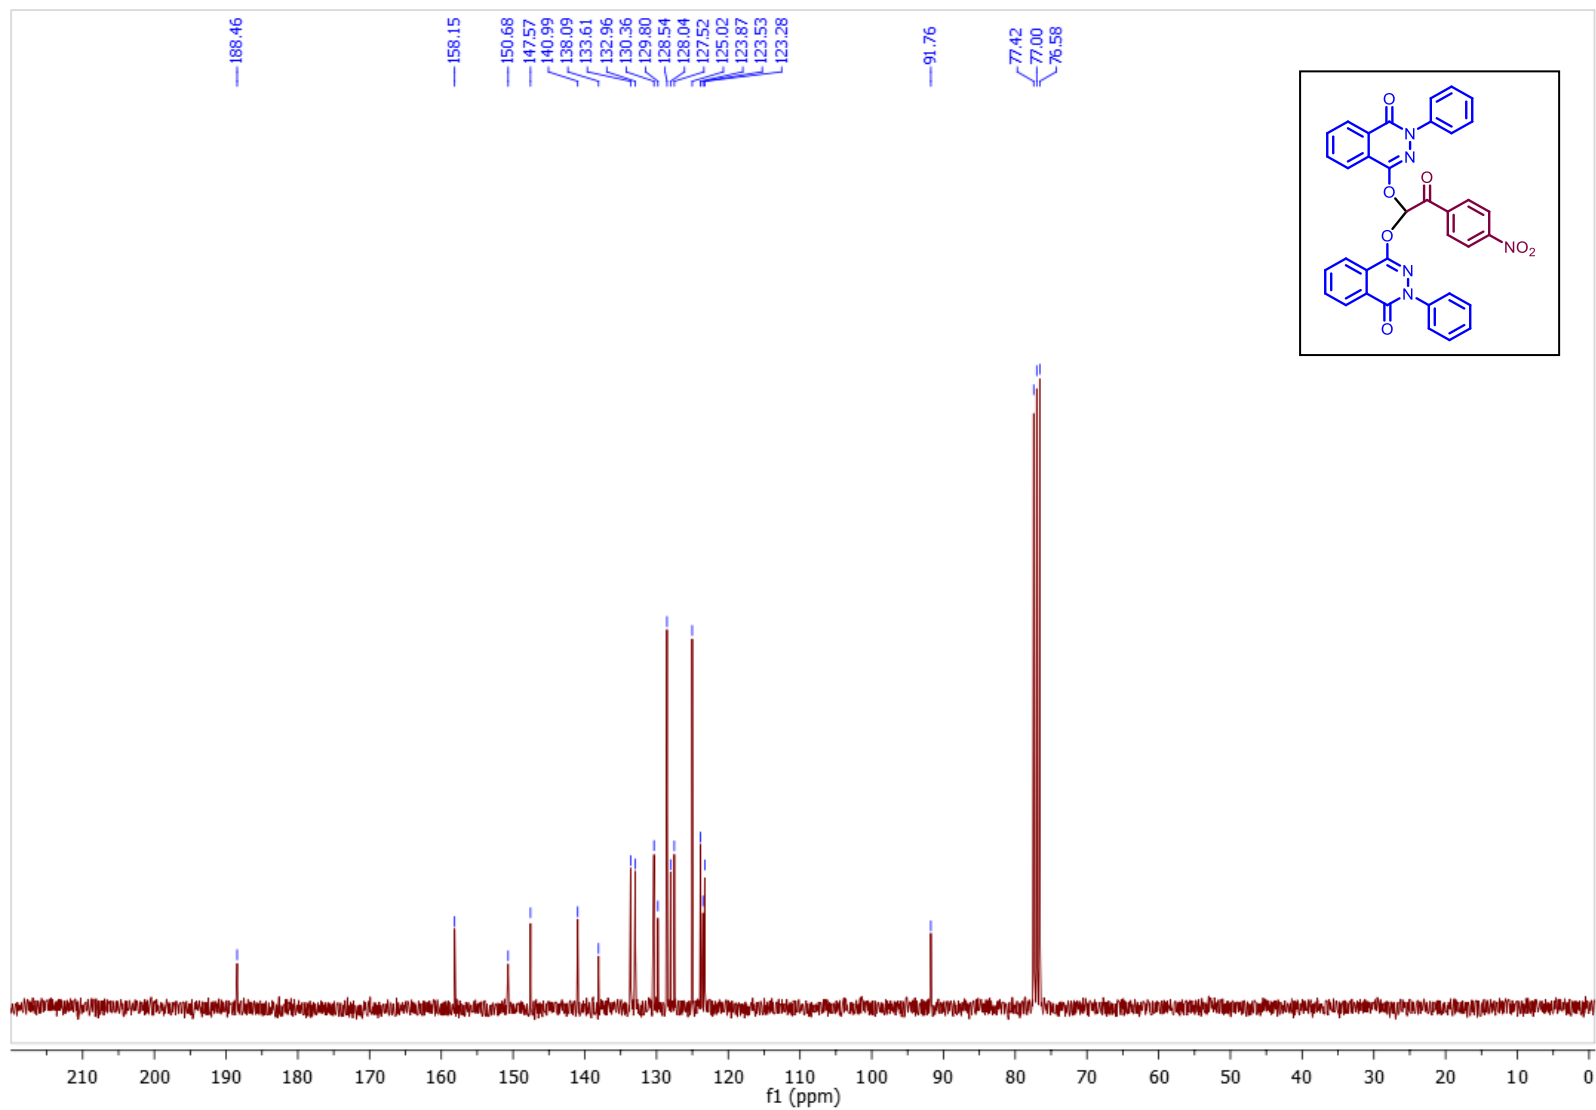

4,4'-((2-(naphthalen-1-yl)-2-oxoethane-1,1-diyl)bis(oxy))bis(2-phenylphthalazin-1(2H)-one) (3g): <sup>1</sup>H NMR (300 MHz, CDCl<sub>3</sub>):

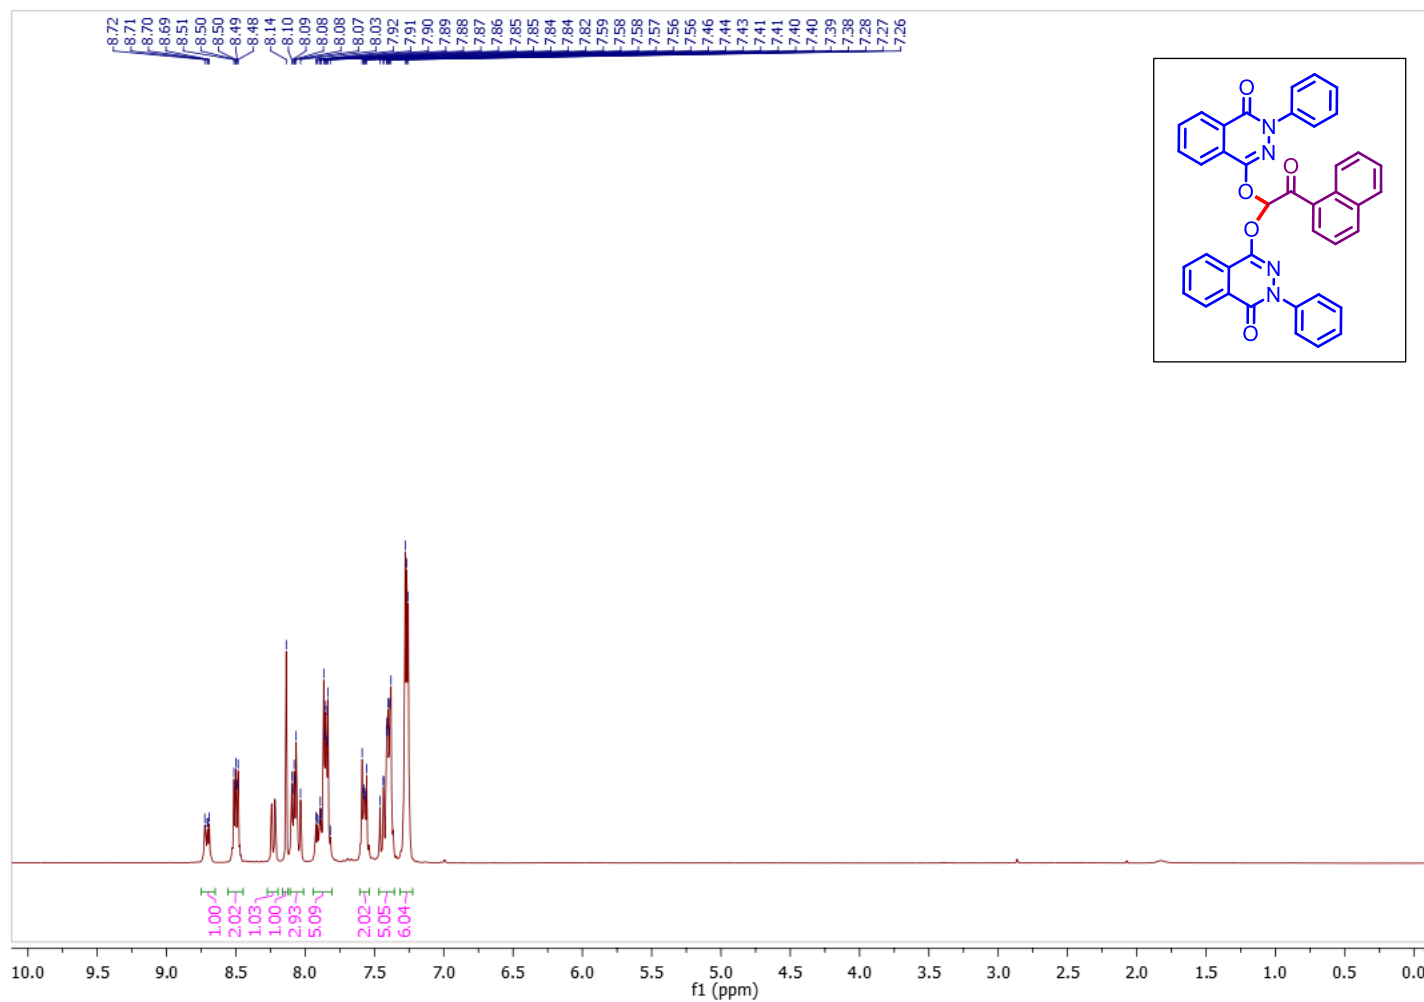

4,4'-((2-(naphthalen-1-yl)-2-oxoethane-1,1-diyl)bis(oxy))bis(2-phenylphthalazin-1(2H)-one) (3g):  $^{13}\text{C}$  NMR (75 MHz,  $\text{CDCl}_3$ ):

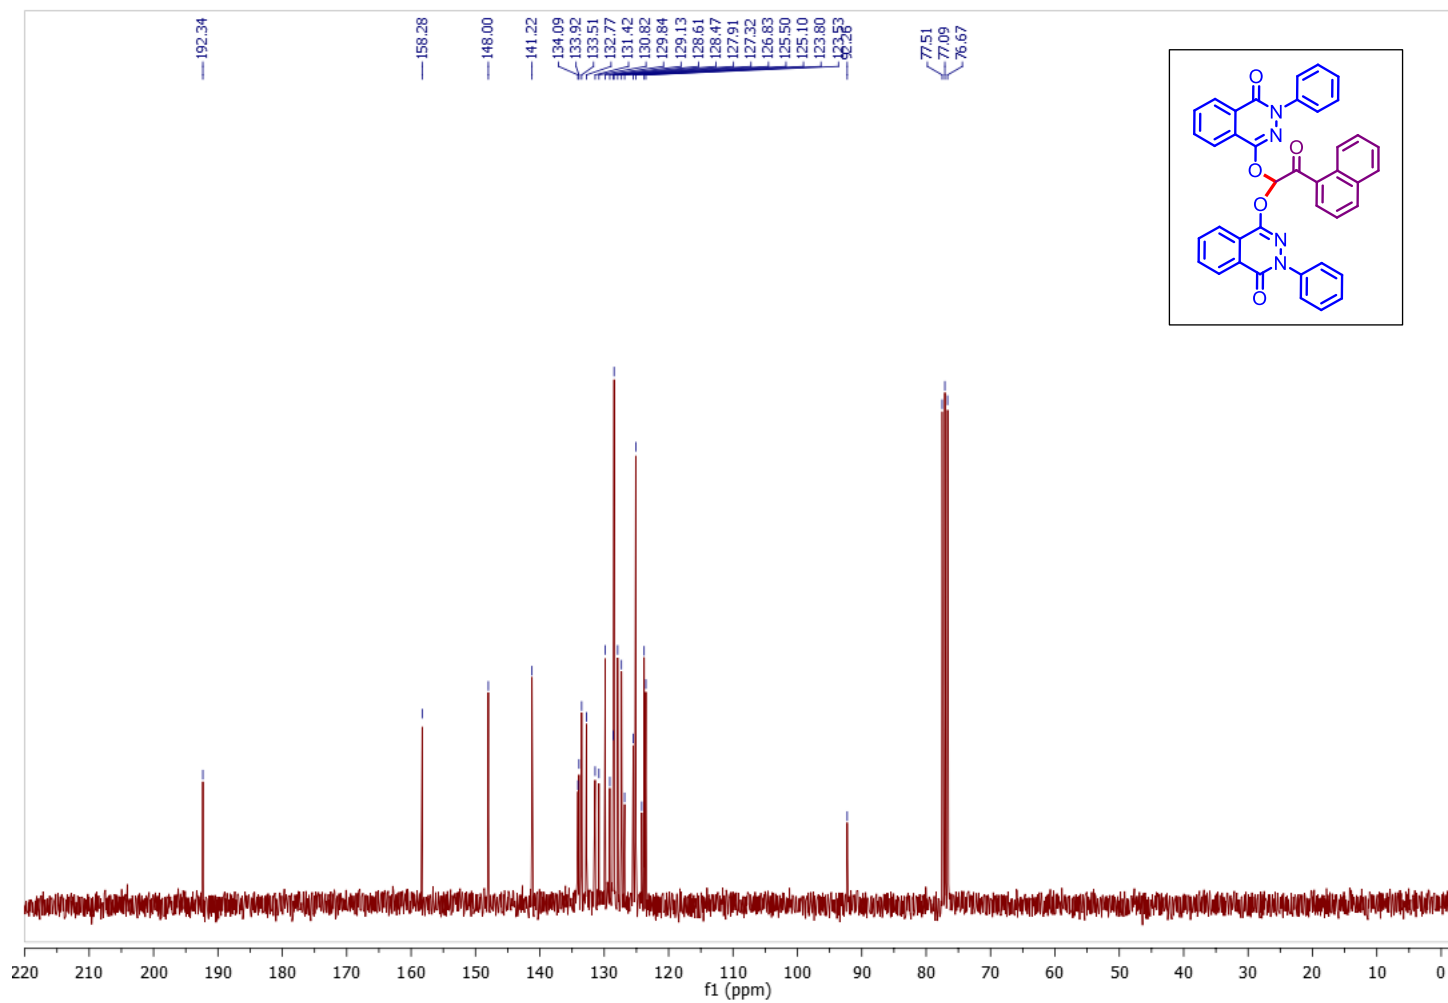



4,4'-((2-([1,1'-biphenyl]-4-yl)-2-oxoethane-1,1-diyl)bis(oxy))bis(2-phenylphthalazin-1(2H)-one) (3h): <sup>1</sup>H NMR (300 MHz, CDCl<sub>3</sub>):

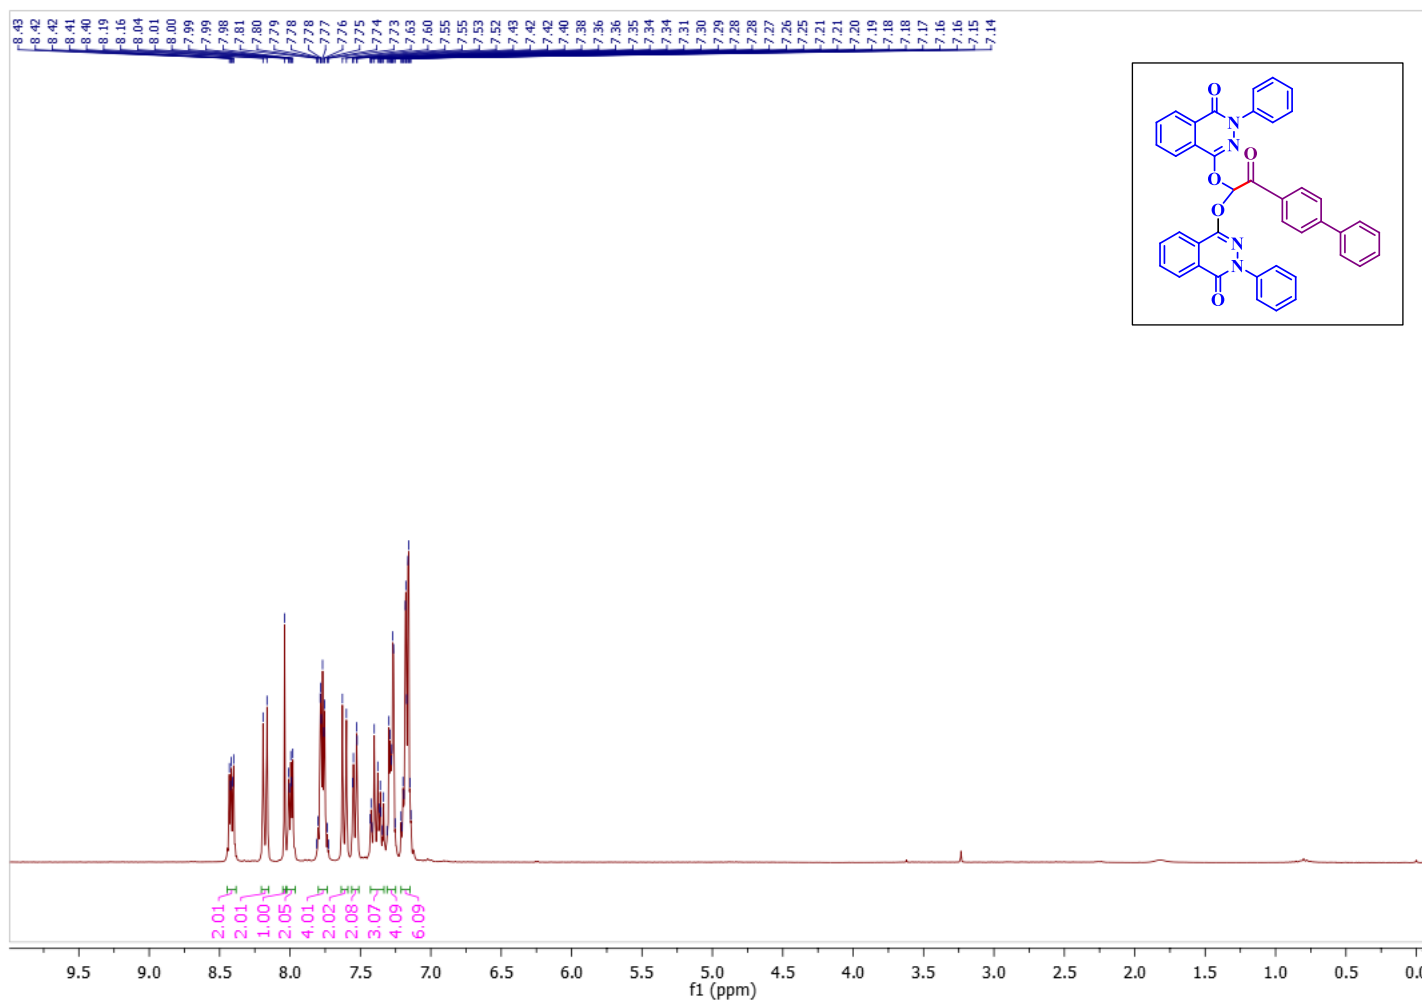

4,4'-((2-([1,1'-biphenyl]-4-yl)-2-oxoethane-1,1-diyl)bis(oxy))bis(2-phenylphthalazin-1(2H)-one) (3h):  $^{13}\text{C}$  NMR (75 MHz,  $\text{CDCl}_3$ ):

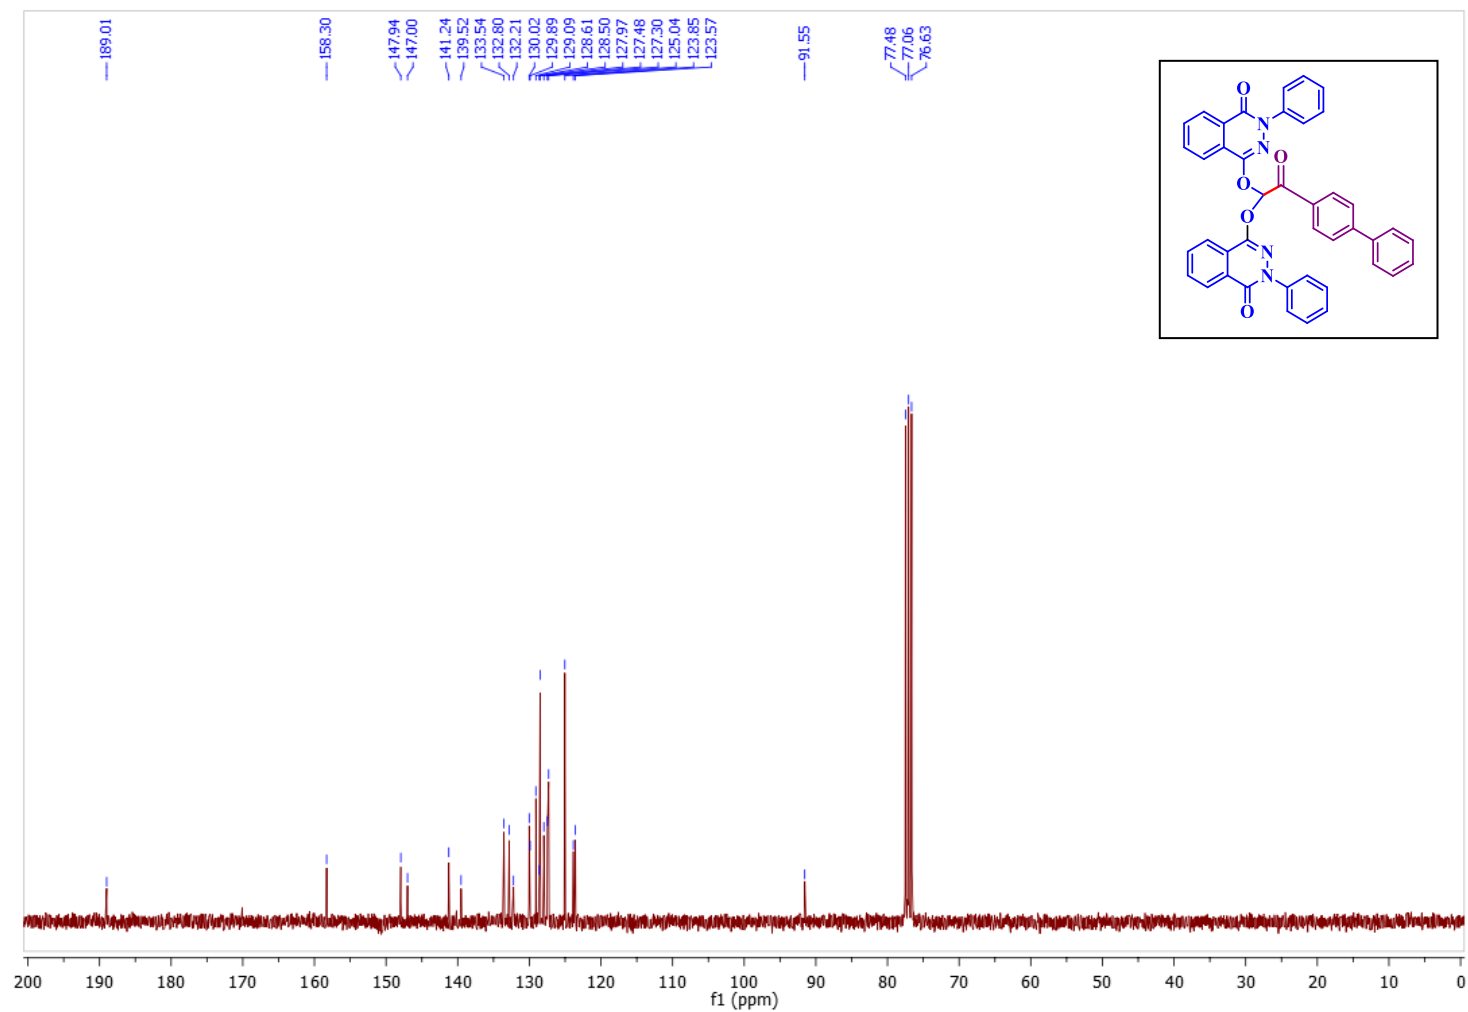

4,4'-((2-oxo-2-(o-tolyl)ethane-1,1-diyl)bis(oxy))bis(2-phenylphthalazin-1(2H)-one) (3i): <sup>1</sup>H NMR (300 MHz, CDCl<sub>3</sub>):

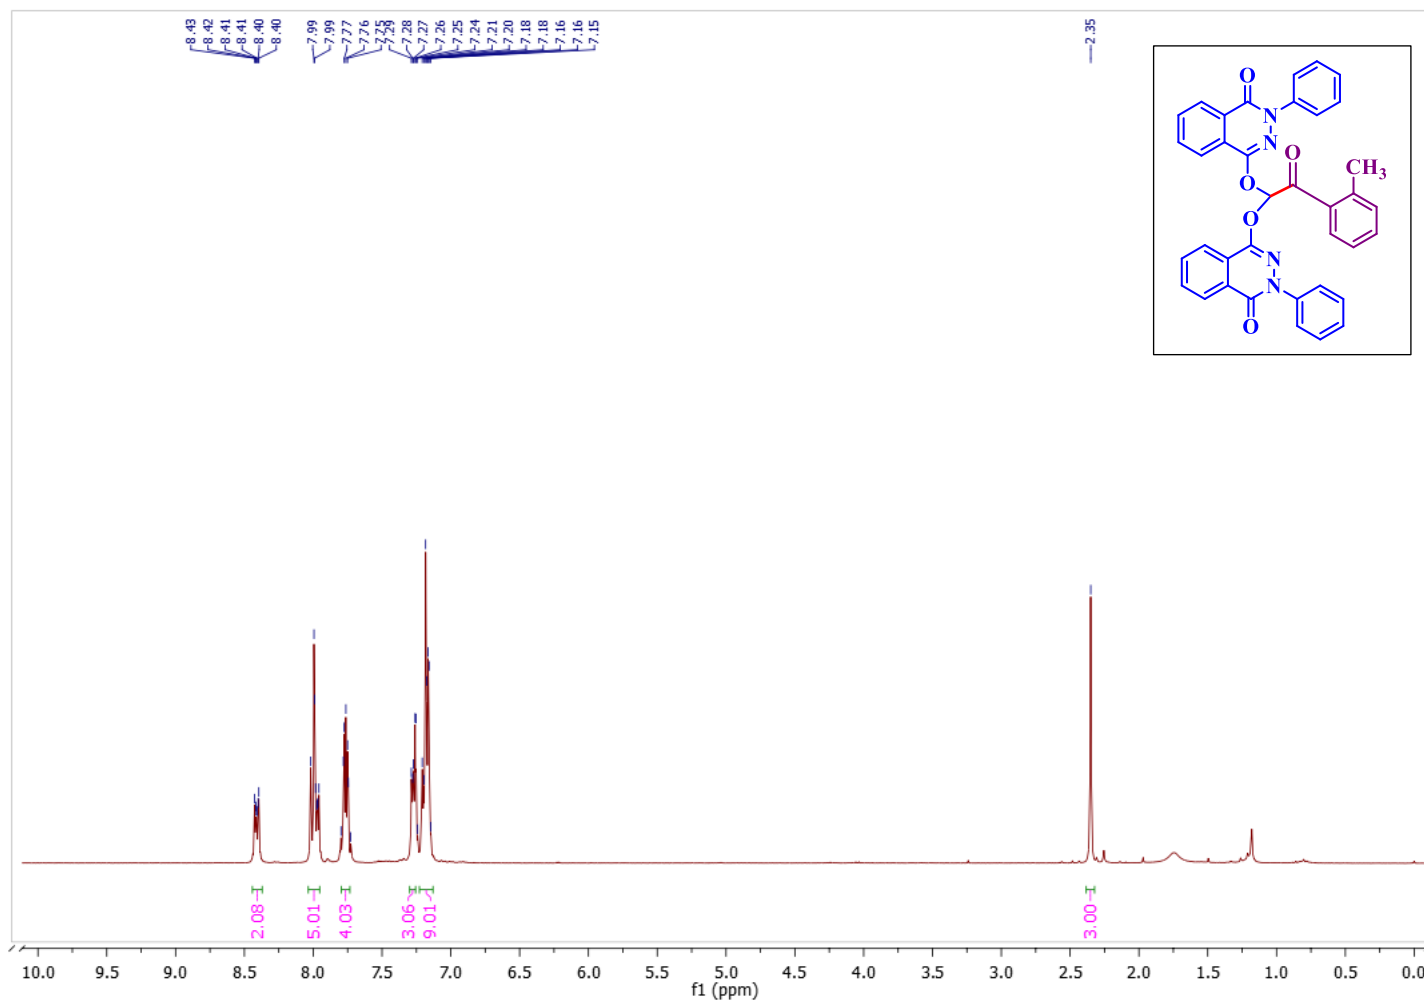

4,4'-((2-oxo-2-(*o*-tolyl)ethane-1,1-diyl)bis(oxy))bis(2-phenylphthalazin-1(2*H*)-one) (**3i**):  $^{13}\text{C}$  NMR (75 MHz,  $\text{CDCl}_3$ ):

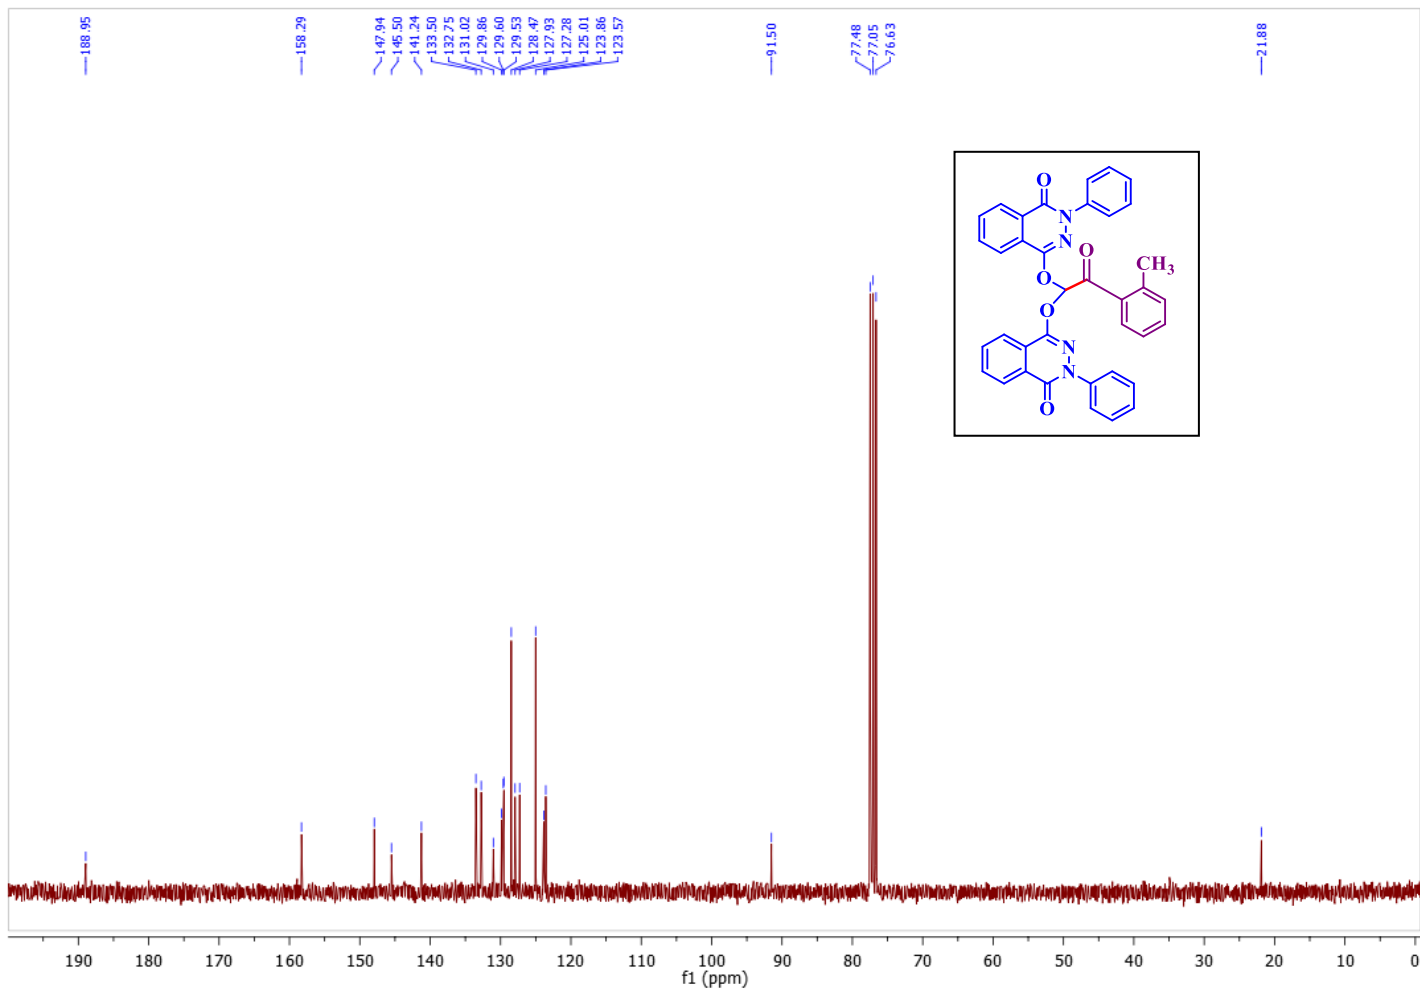

4,4'-((2-oxo-2-(p-tolyl)ethane-1,1-diyl)bis(oxy))bis(2-phenylphthalazin-1(2H)-one) (3j): <sup>1</sup>H NMR (500 MHz, CDCl<sub>3</sub>):

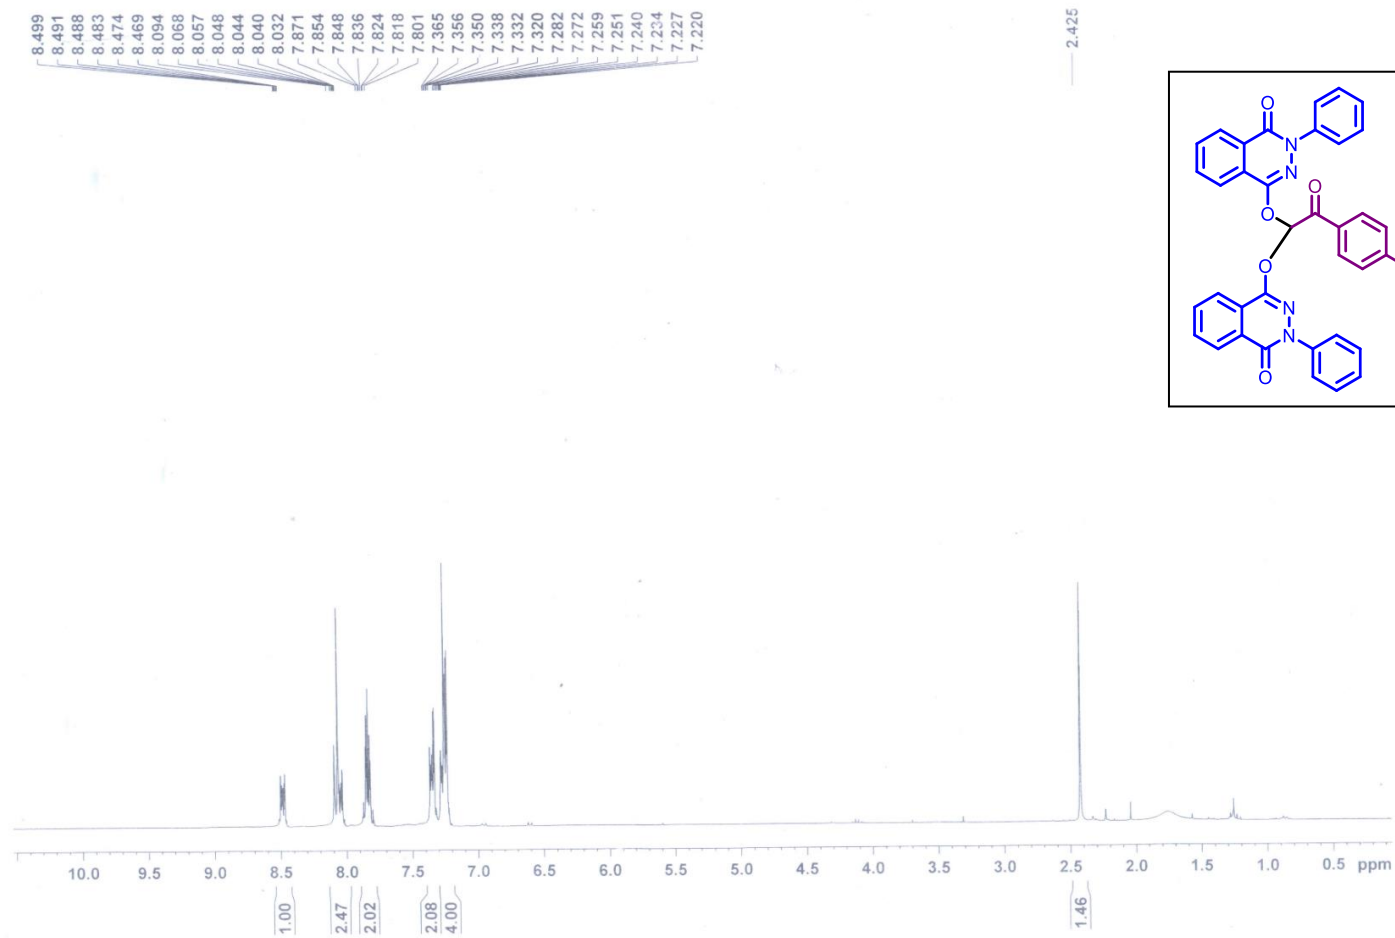

4,4'-((2-oxo-2-(p-tolyl)ethane-1,1-diyl)bis(oxy))bis(2-phenylphthalazin-1(2H)-one) (3j):  $^{13}\text{C}$  NMR (125 MHz,  $\text{CDCl}_3$ ):

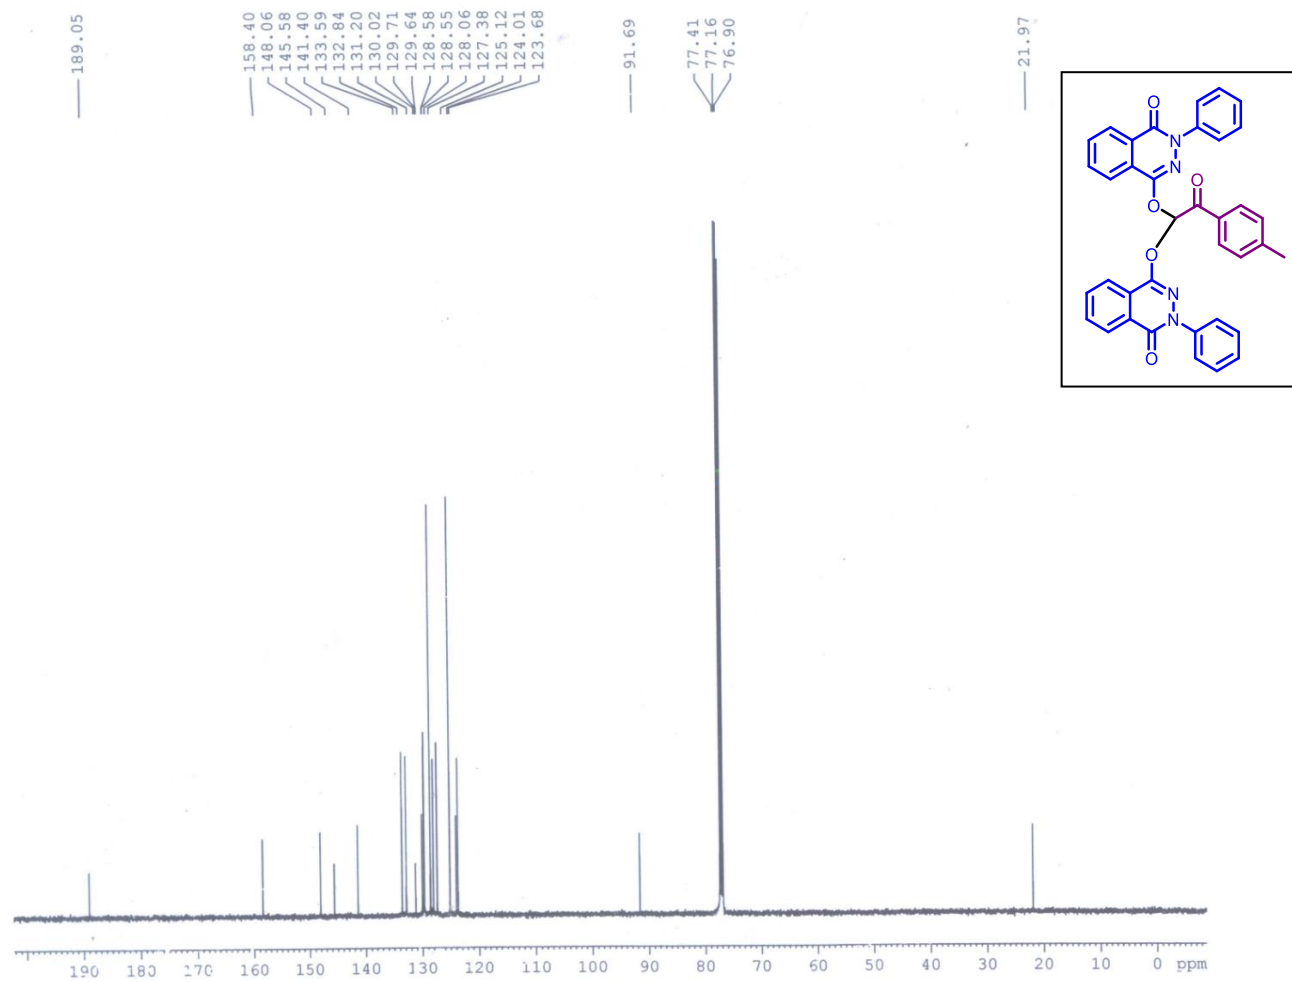

4,4'-((2-(4-methoxyphenyl)-2-oxoethane-1,1-diyl)bis(oxy))bis(2-phenylphthalazin-1(2H)-one) (3k):  $^1\text{H}$  NMR (300 MHz,  $\text{CDCl}_3$ ):

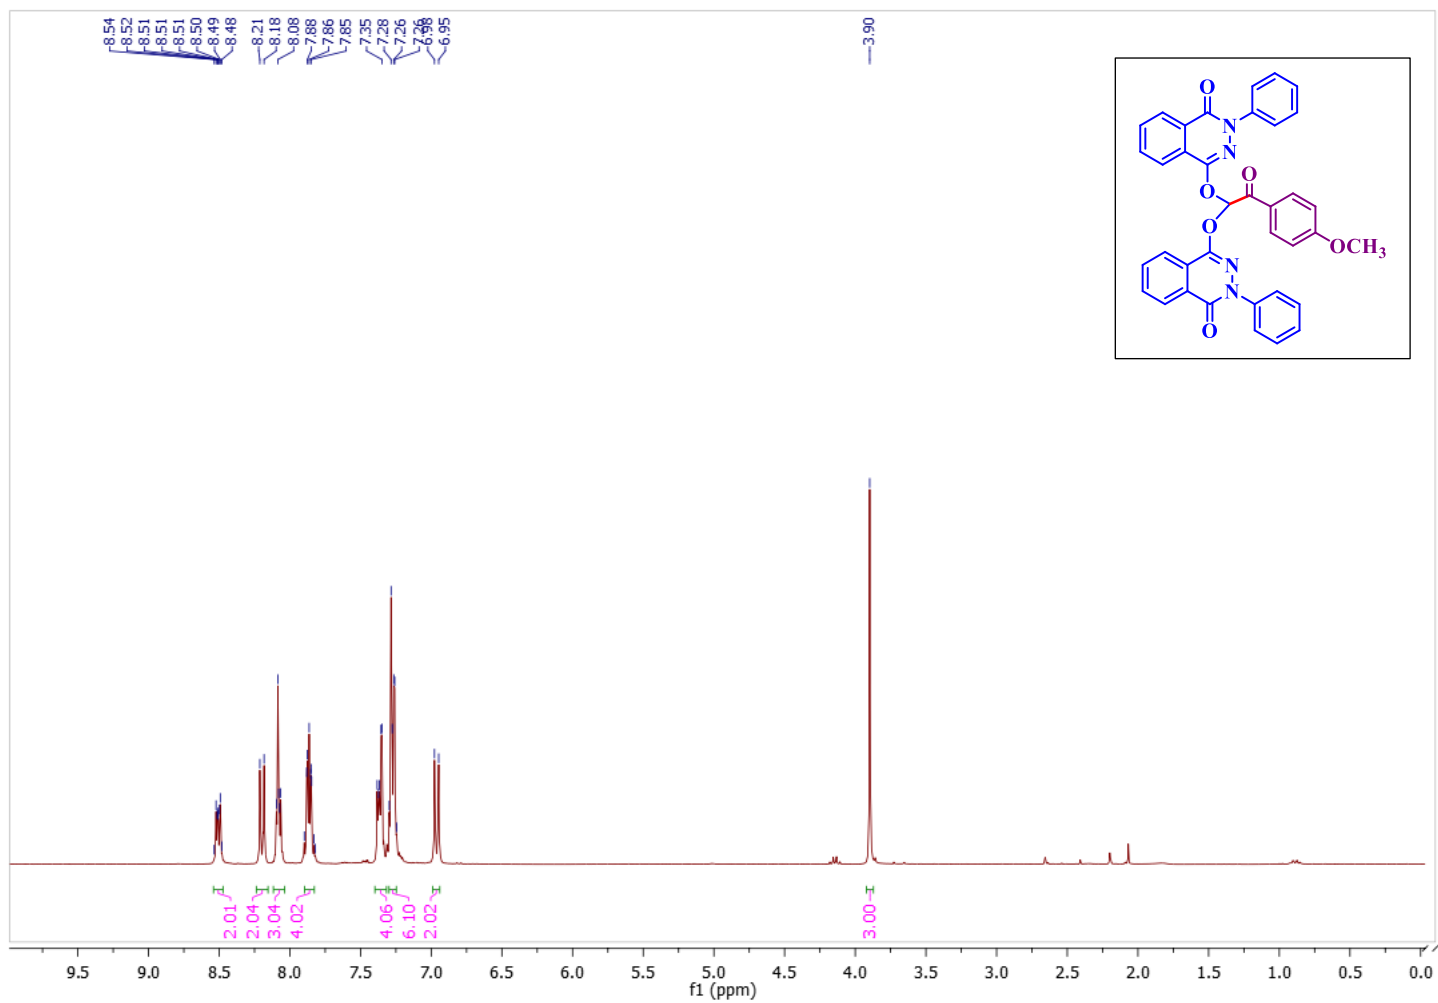

4,4'-((2-(4-methoxyphenyl)-2-oxoethane-1,1-diyl)bis(oxy))bis(2-phenylphthalazin-1(2H)-one) (3k):  $^{13}\text{C}$  NMR (75 MHz,  $\text{CDCl}_3$ ):

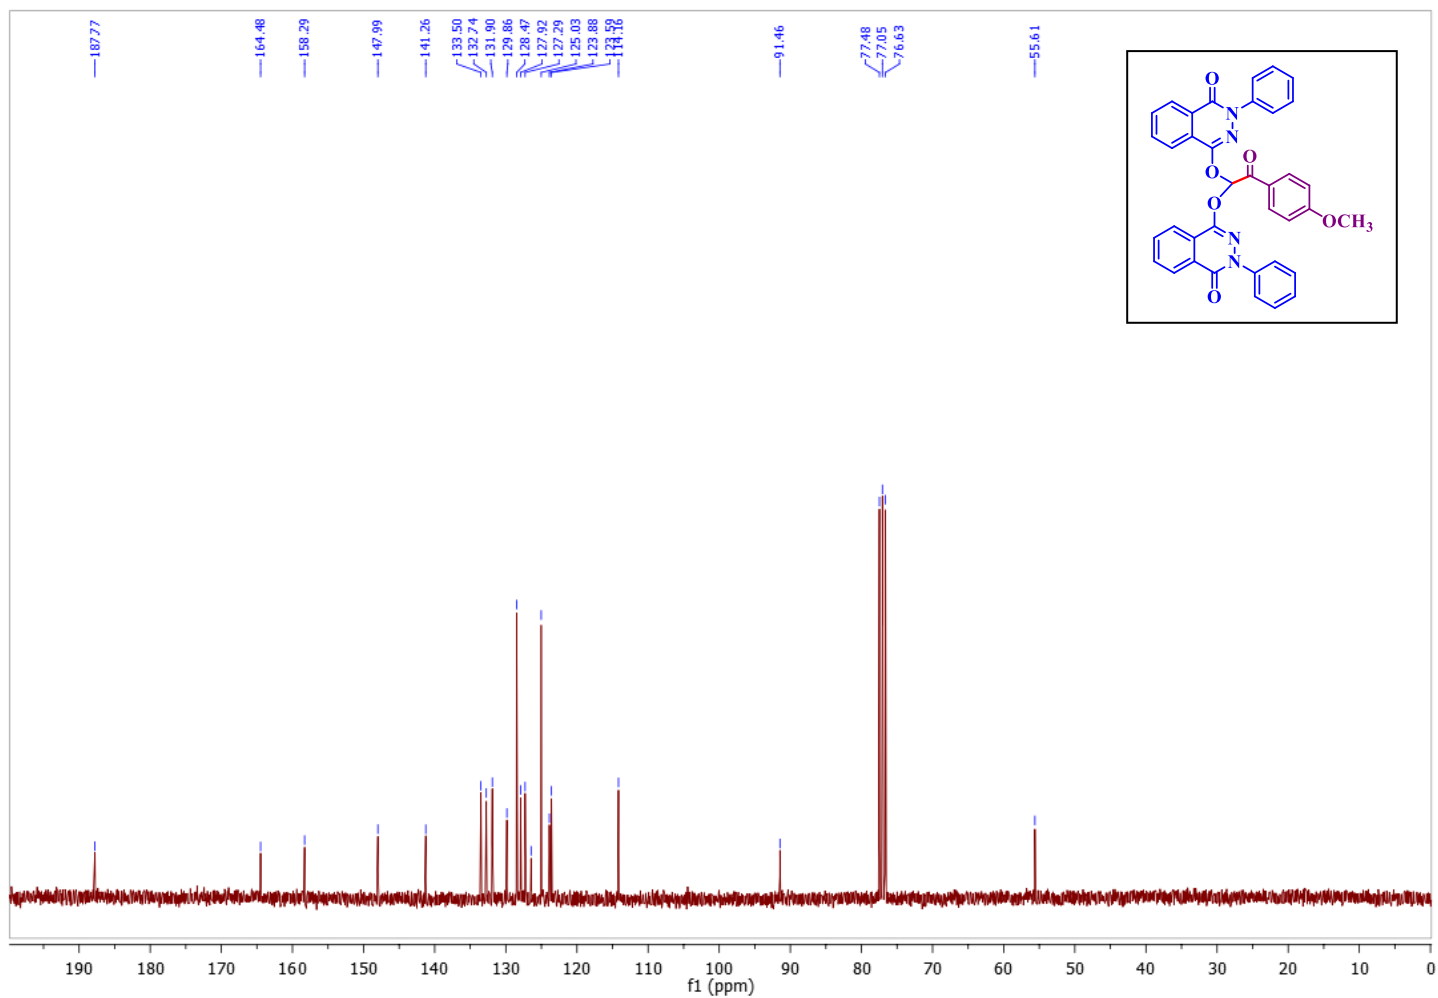



4,4'-((2-(4-(methylthio)phenyl)-2-oxoethane-1,1-diyl)bis(oxy))bis(2-phenylphthalazin-1(2H)-one) (31): <sup>1</sup>H NMR (300 MHz, CDCl<sub>3</sub>):

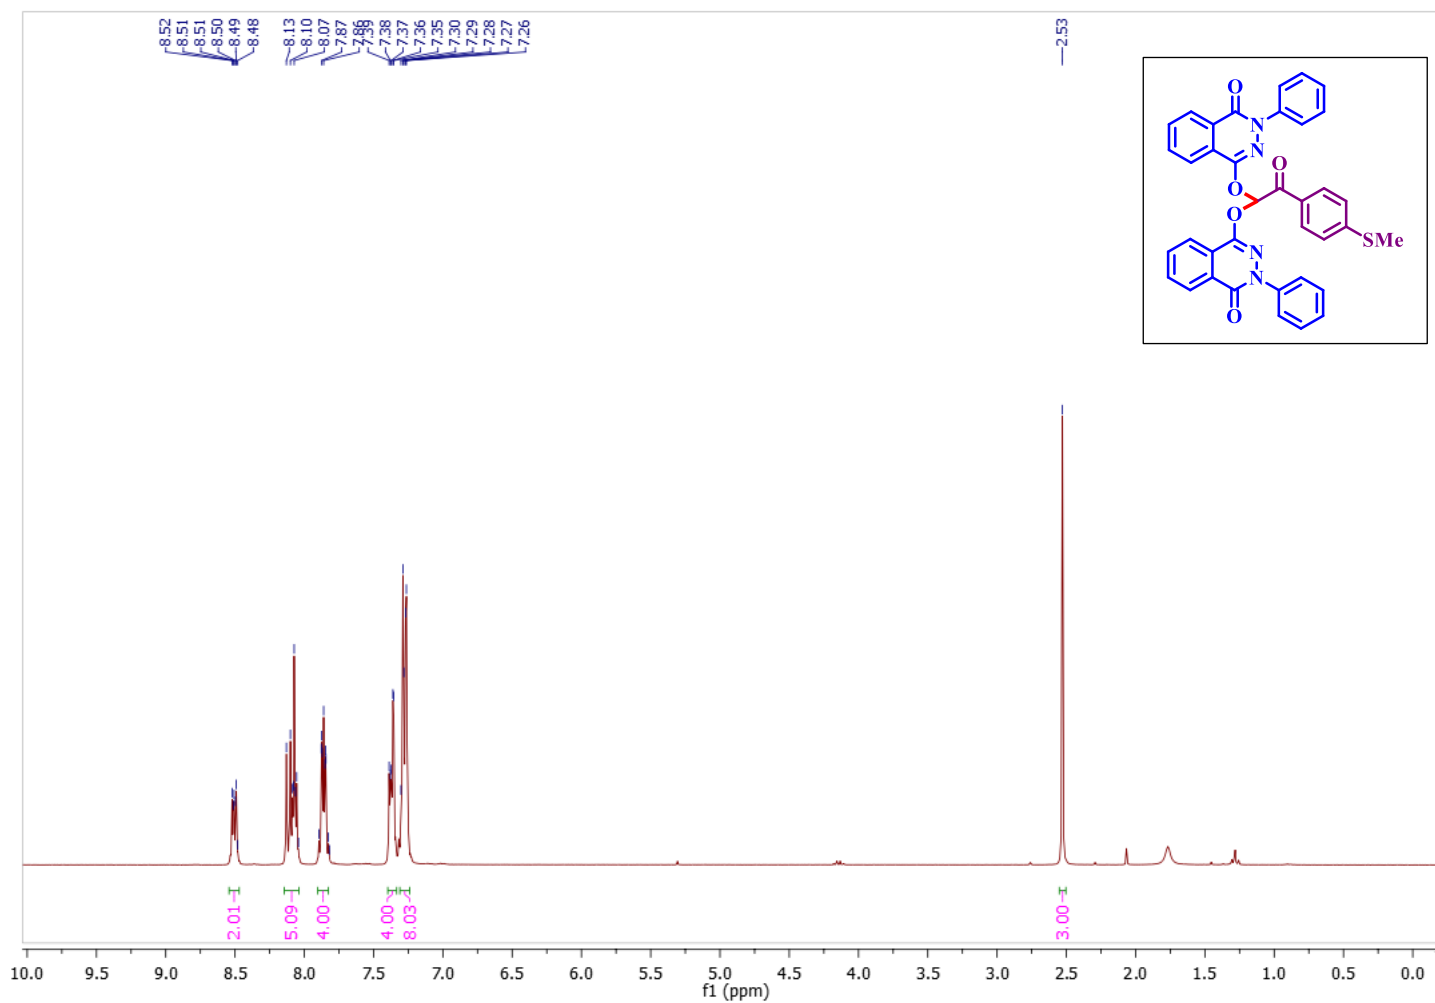

4,4'-((2-(4-(methylthio)phenyl)-2-oxoethane-1,1-diyl)bis(oxy))bis(2-phenylphthalazin-1(2H)-one) (3l):  $^{13}\text{C}$  NMR (75 MHz,  $\text{CDCl}_3$ ):

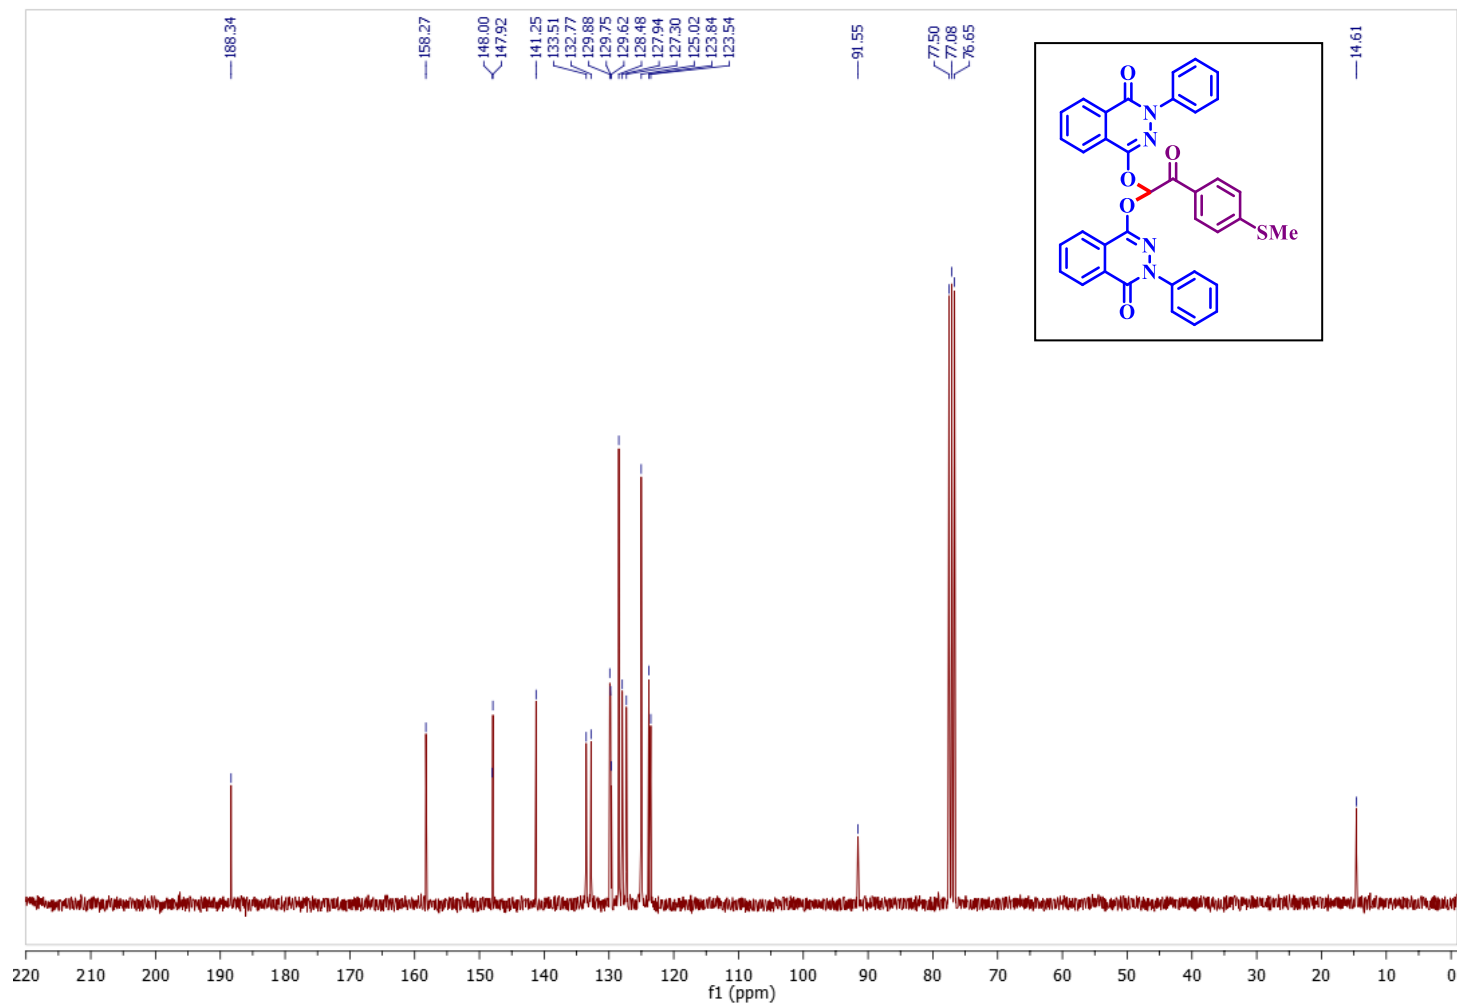

4,4'-((2-(4-(tert-butyl)phenyl)-2-oxoethane-1,1-diyl)bis(oxy))bis(2-phenylphthalazin-1(2H)-one) (3m):  $^1\text{H}$  NMR (300 MHz,  $\text{CDCl}_3$ ):

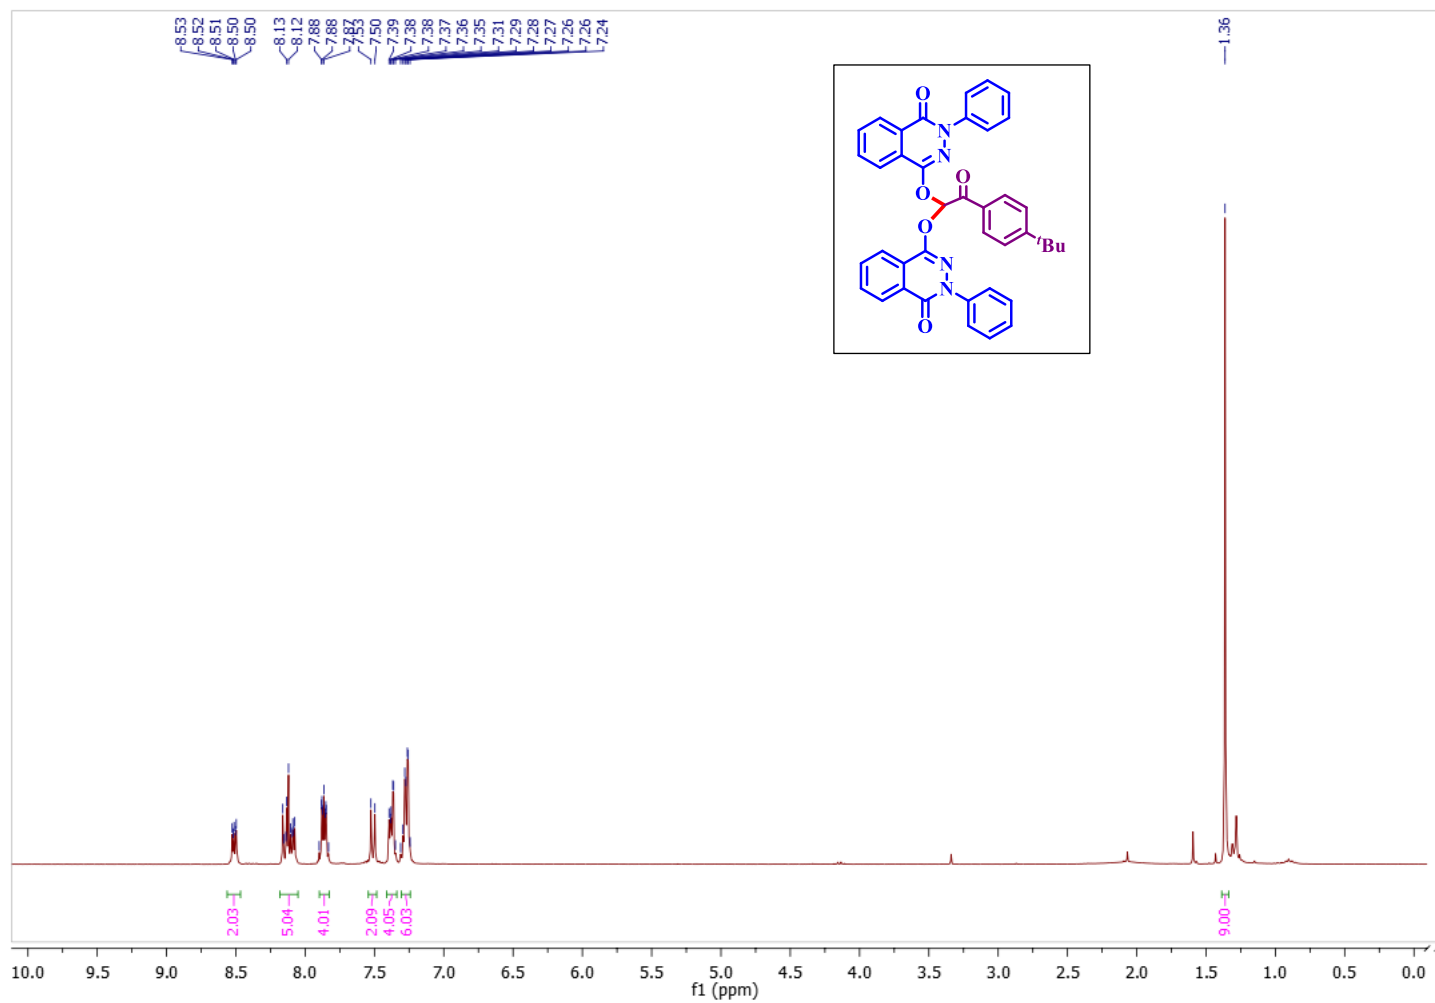

4,4'-((2-(4-(tert-butyl)phenyl)-2-oxoethane-1,1-diyl)bis(oxy))bis(2-phenylphthalazin-1(2H)-one) (3m):  $^{13}\text{C}$  NMR (75 MHz,  $\text{CDCl}_3$ ):

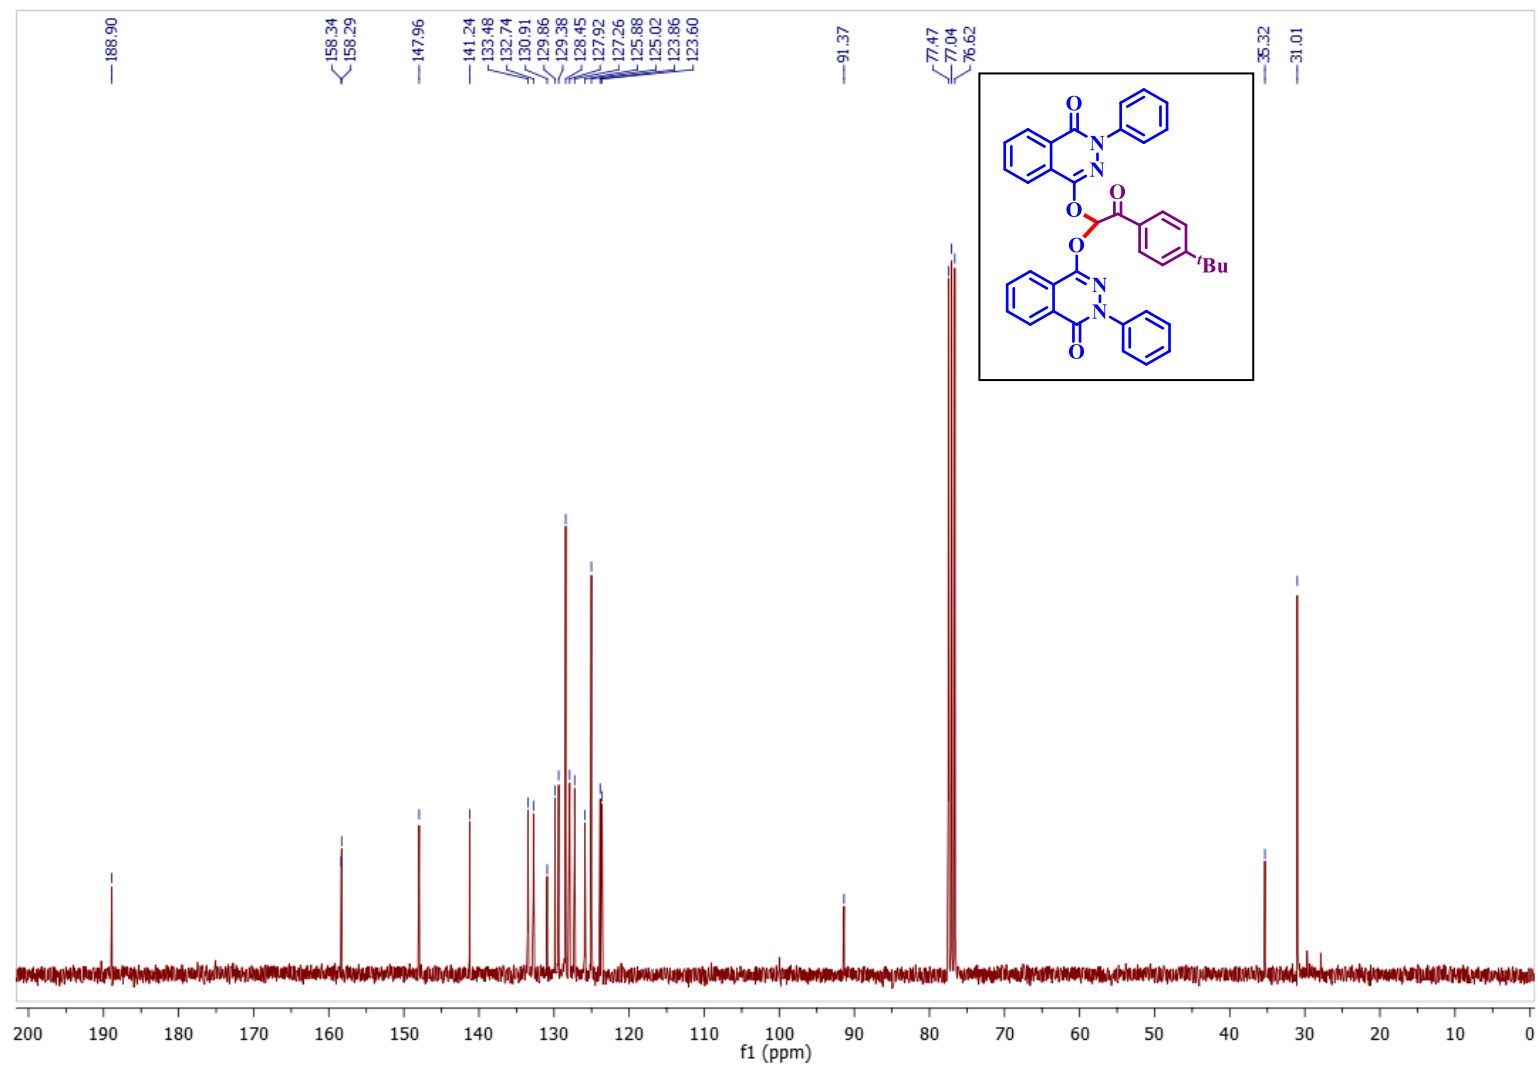

4,4'-((2-oxo-2-(4-(trifluoromethyl)phenyl)ethane-1,1-diyl)bis(oxy))bis(2-phenylphthalazin-1(2H)-one) (3n):  $^1\text{H}$  NMR (300 MHz,  $\text{CDCl}_3$ ):

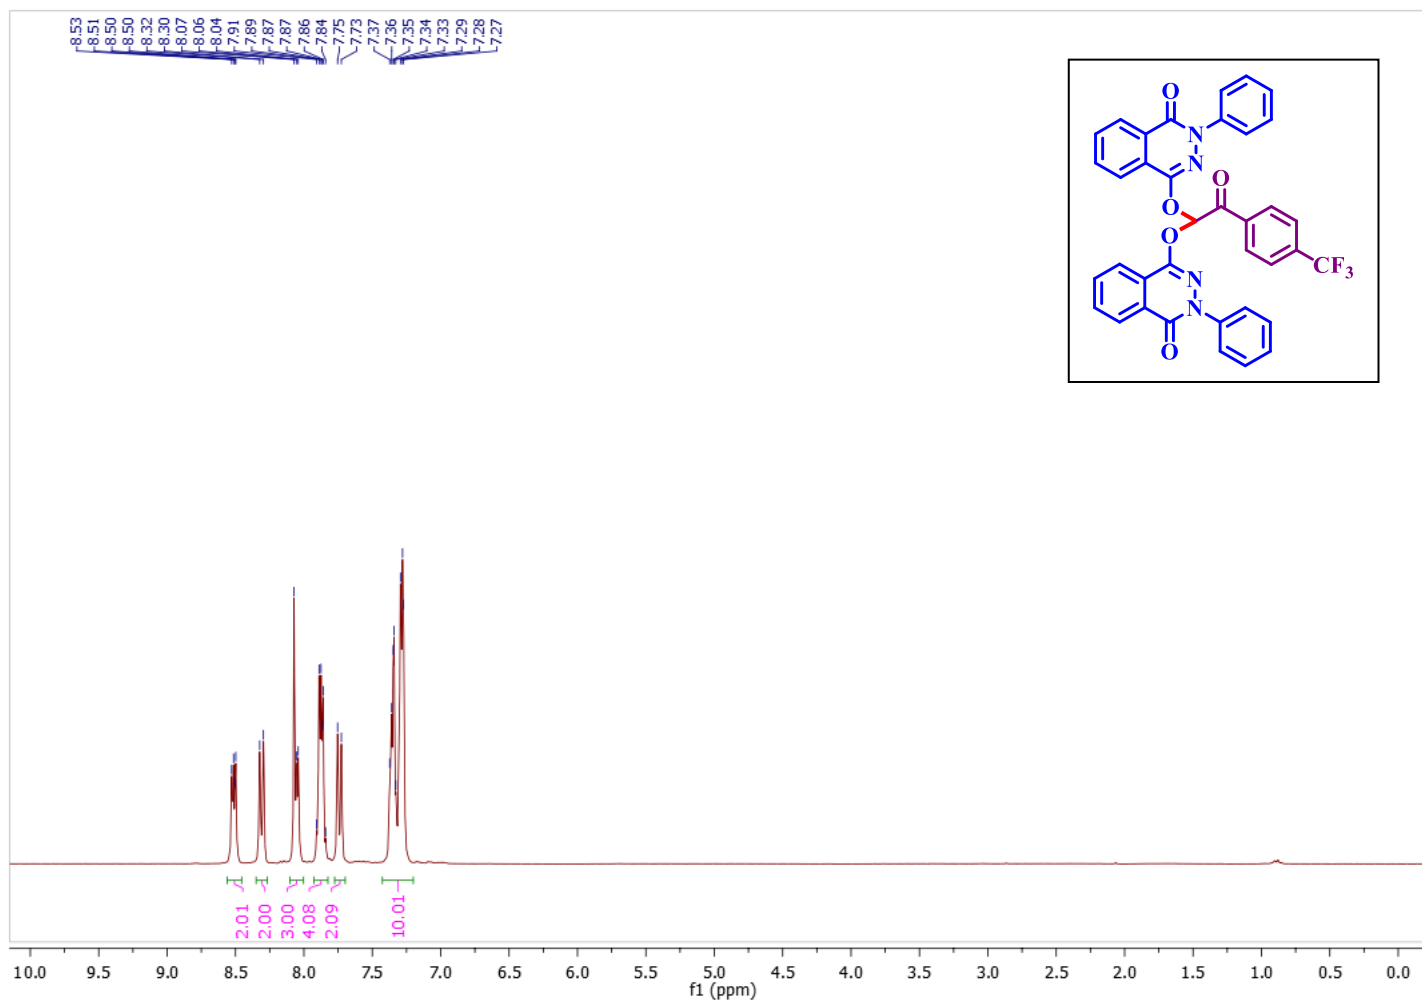

4,4'-((2-oxo-2-(4-(trifluoromethyl)phenyl)ethane-1,1-diyl)bis(oxy))bis(2-phenylphthalazin-1(2H)-one) (3n):  $^{13}\text{C}$  NMR (75 MHz,  $\text{CDCl}_3$ ):

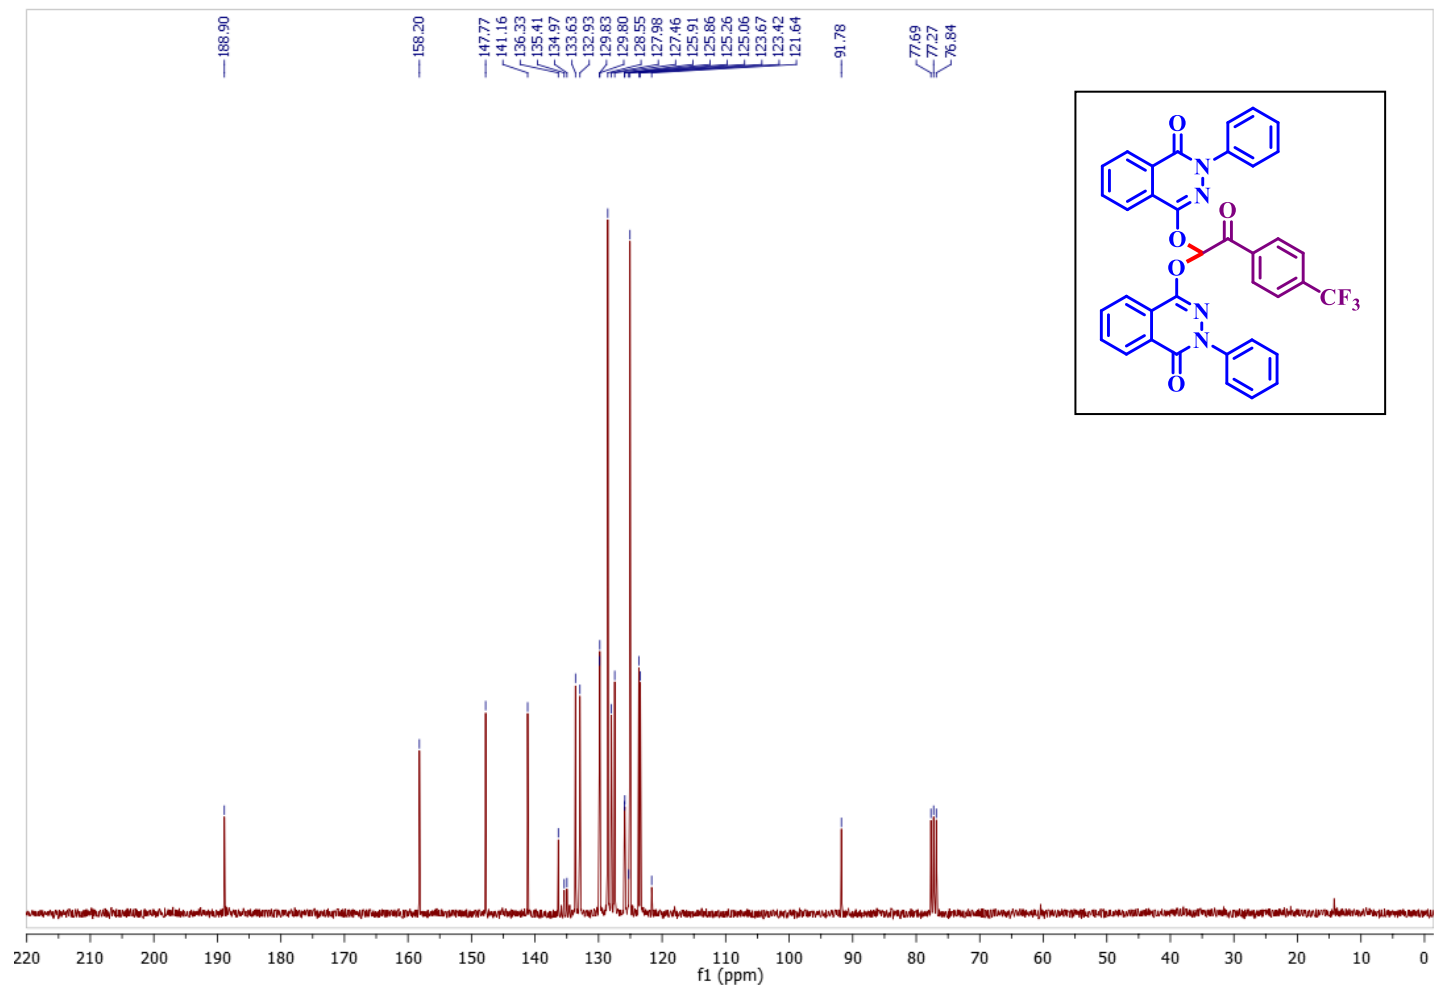

4,4'-((2-(2-hydroxyphenyl)-2-oxoethane-1,1-diyl)bis(oxy))bis(2-phenylphthalazin-1(2H)-one) (3o): <sup>1</sup>H NMR (300 MHz, CDCl<sub>3</sub>):

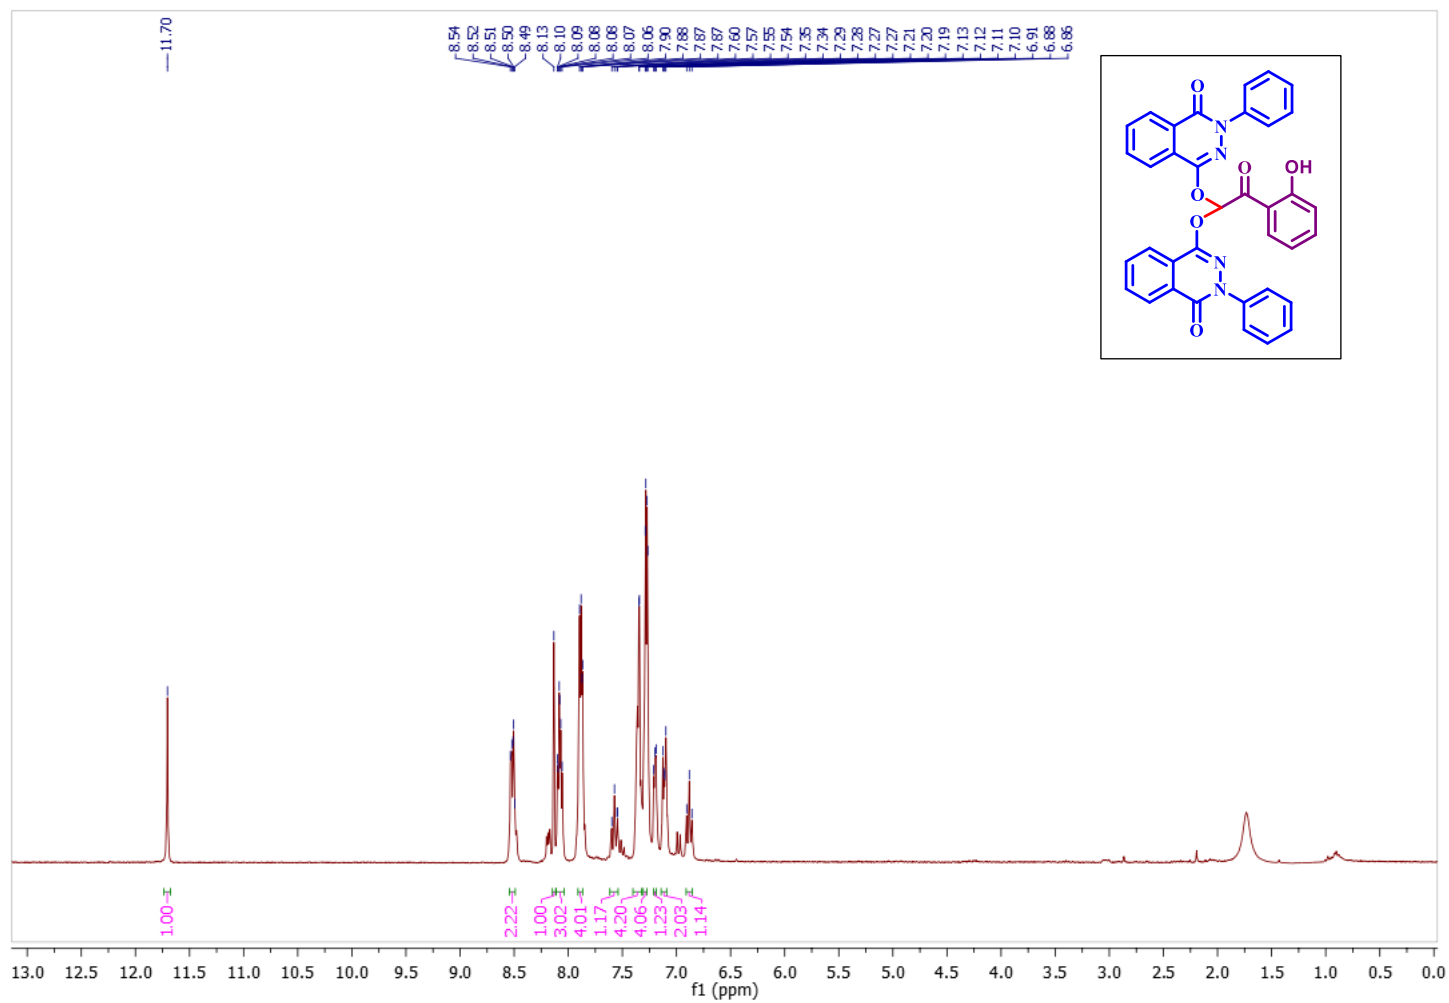

4,4'-((2-(2-hydroxyphenyl)-2-oxoethane-1,1-diyl)bis(oxy))bis(2-phenylphthalazin-1(2H)-one) (3o):  $^{13}\text{C}$  NMR (75 MHz,  $\text{CDCl}_3$ ):

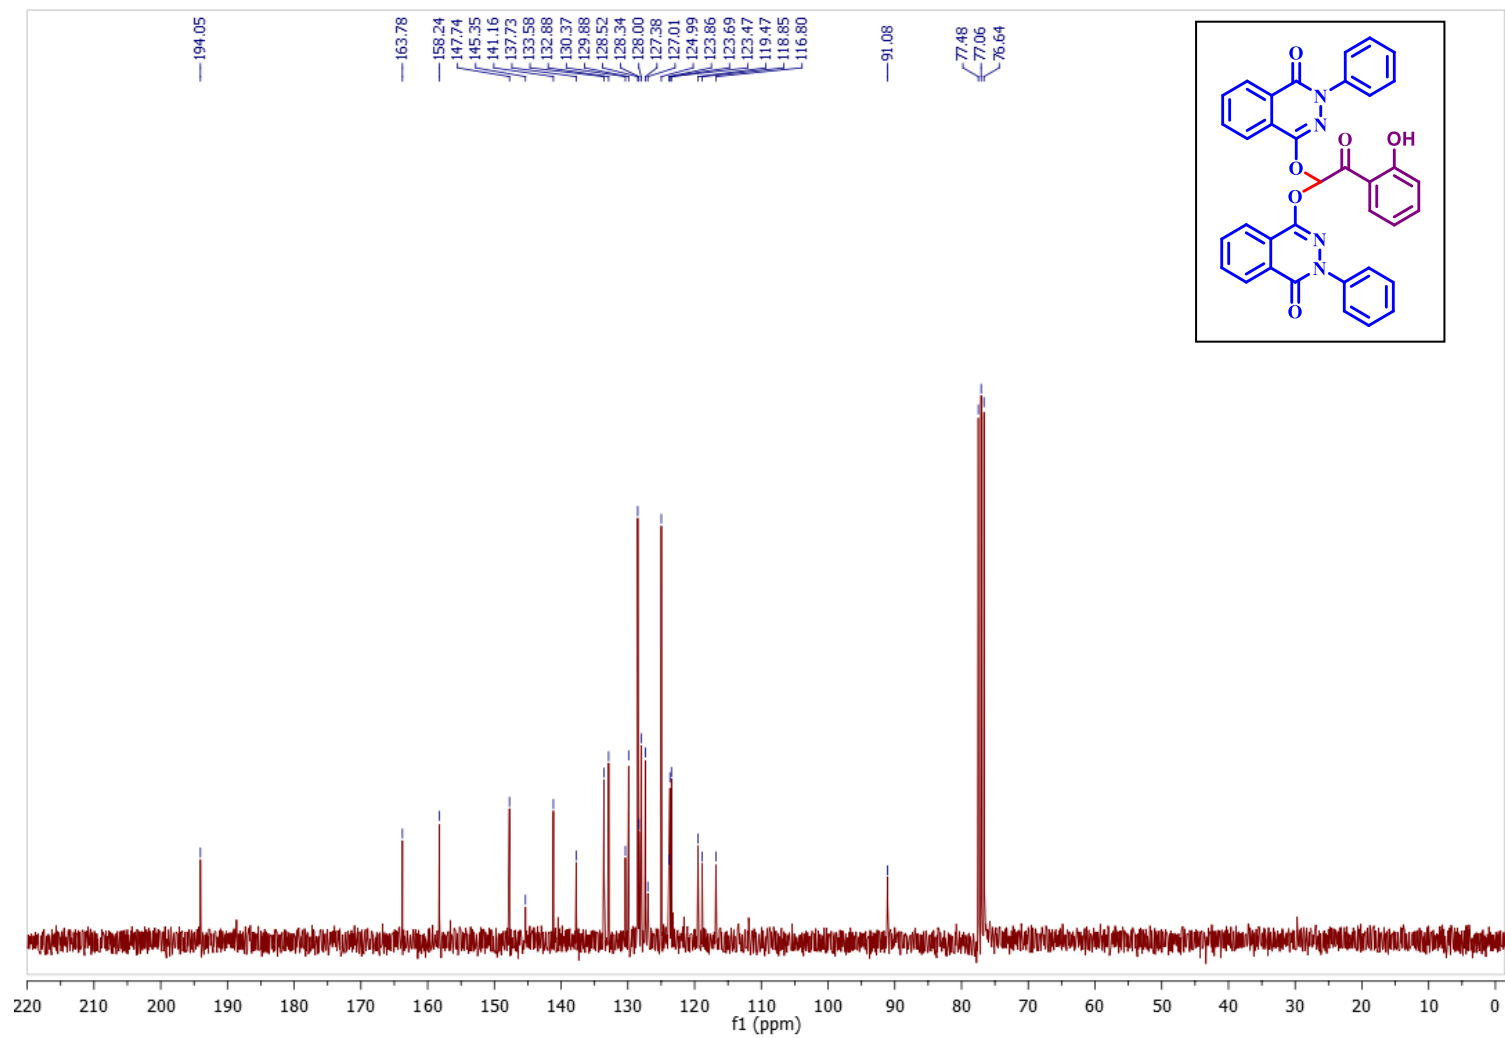



4,4'-((2-oxo-2-phenylethane-1,1-diyl)bis(oxy))bis(2-(p-tolyl)phthalazin-1(2H)-one) (3p):  $^1\text{H}$  NMR (300 MHz,  $\text{CDCl}_3$ ):

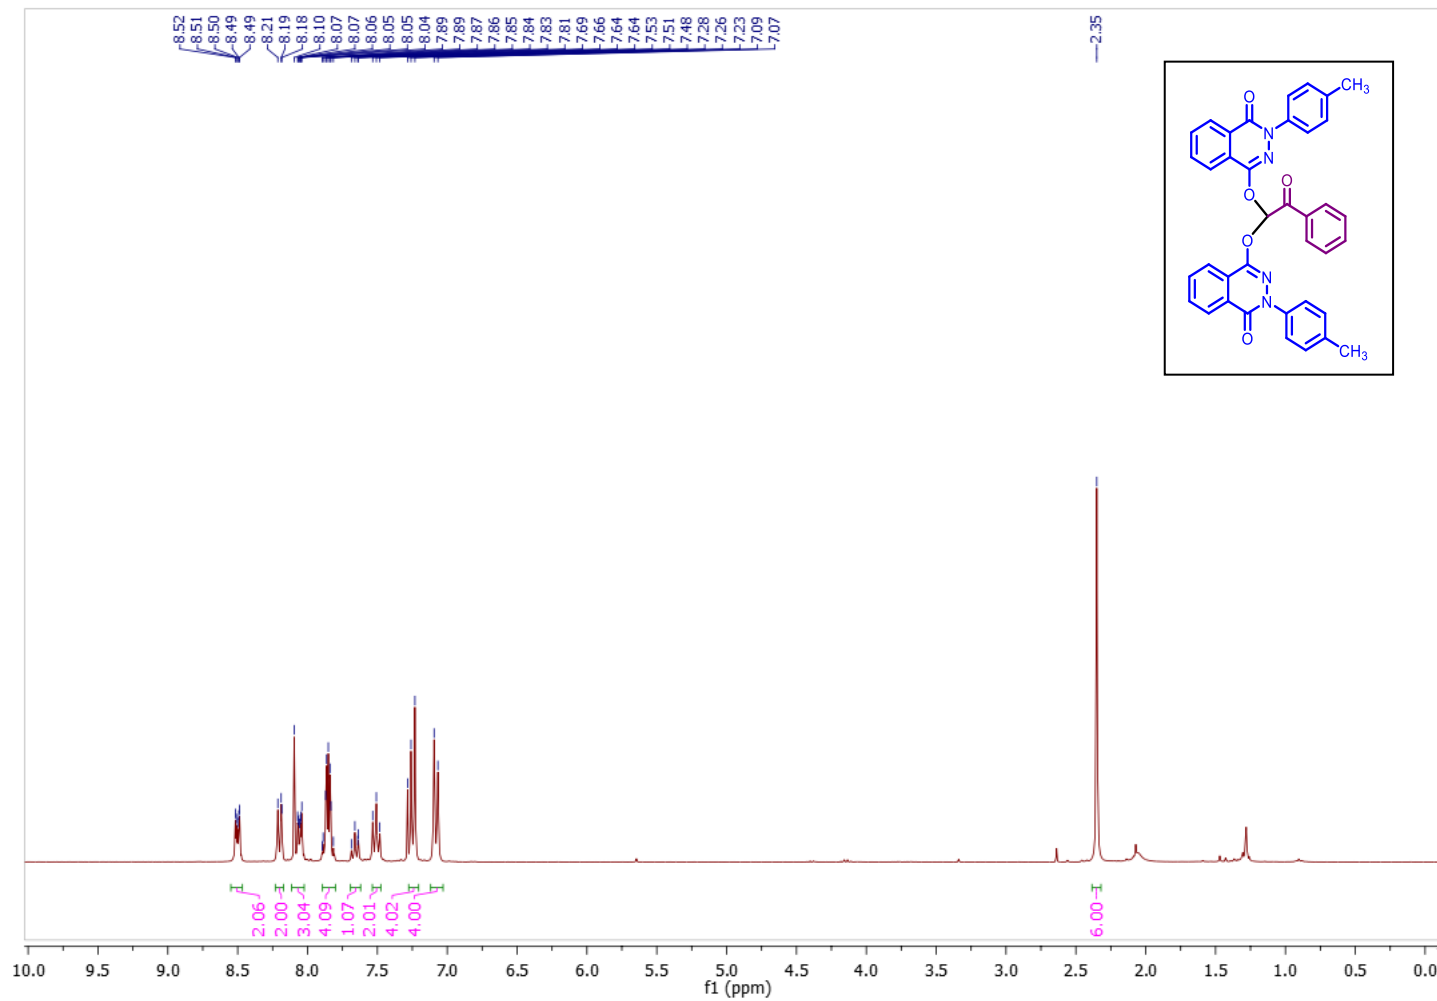

4,4'-((2-oxo-2-phenylethane-1,1-diyl)bis(oxy))bis(2-(p-tolyl)phthalazin-1(2H)-one) (3p):  $^{13}\text{C}$  NMR (75 MHz,  $\text{CDCl}_3$ ):

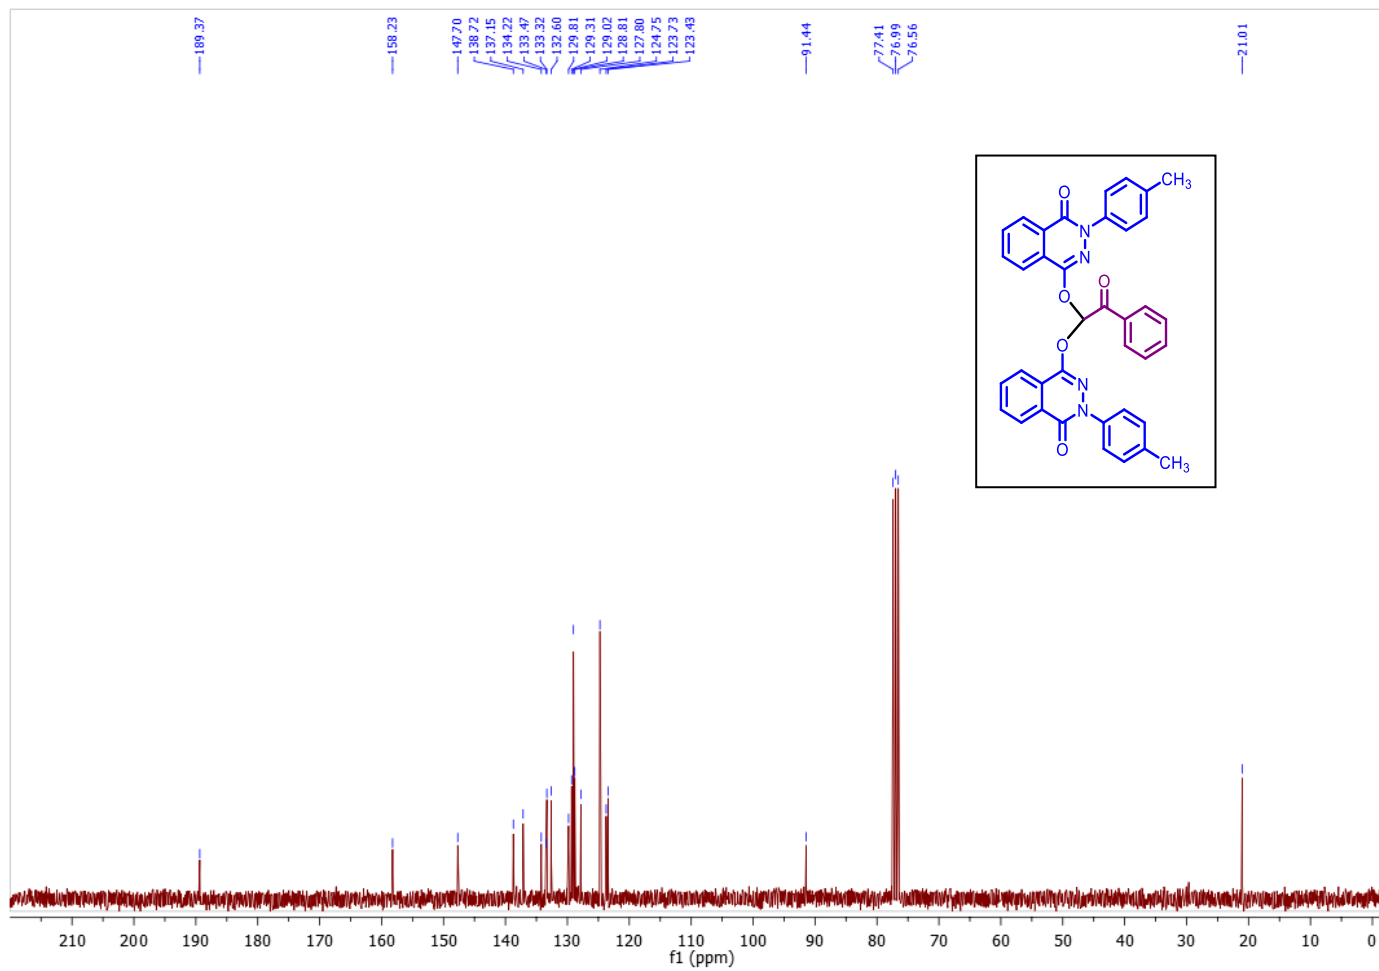

4,4'-((2-cyclopropyl-2-oxoethane-1,1-diyl)bis(oxy))bis(2-phenylphthalazin-1(2H)-one) (3q): <sup>1</sup>H NMR (300 MHz, CDCl<sub>3</sub>):

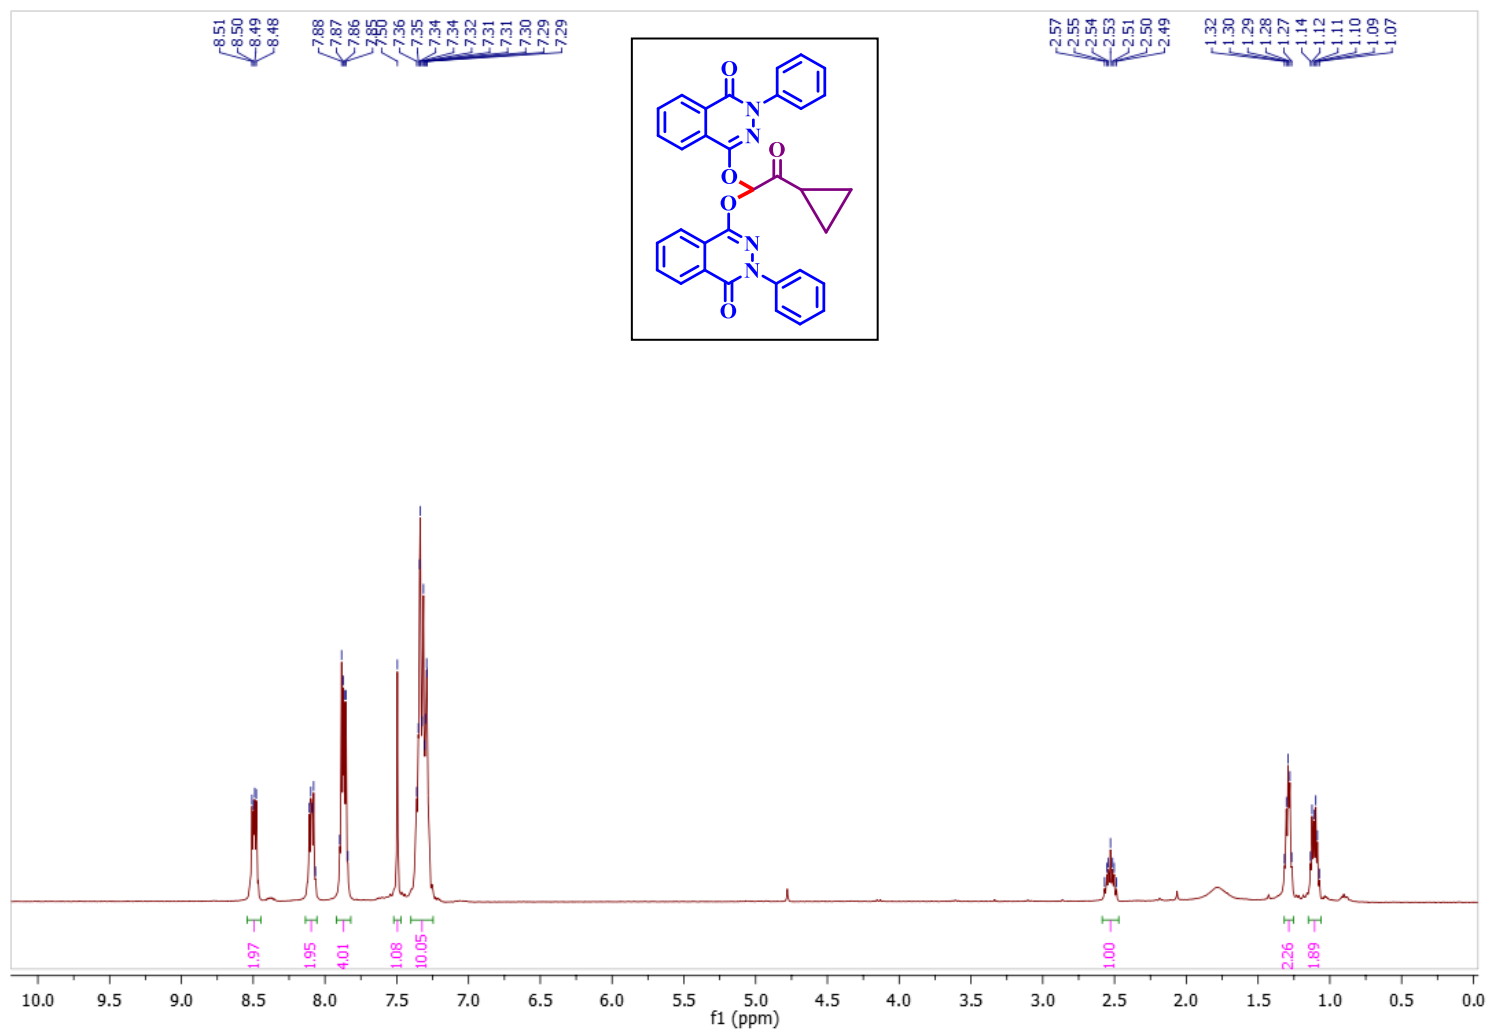

4,4'-((2-cyclopropyl-2-oxoethane-1,1-diyl)bis(oxy))bis(2-phenylphthalazin-1(2H)-one) (3q):  $^{13}\text{C}$  NMR (75 MHz,  $\text{CDCl}_3$ ):

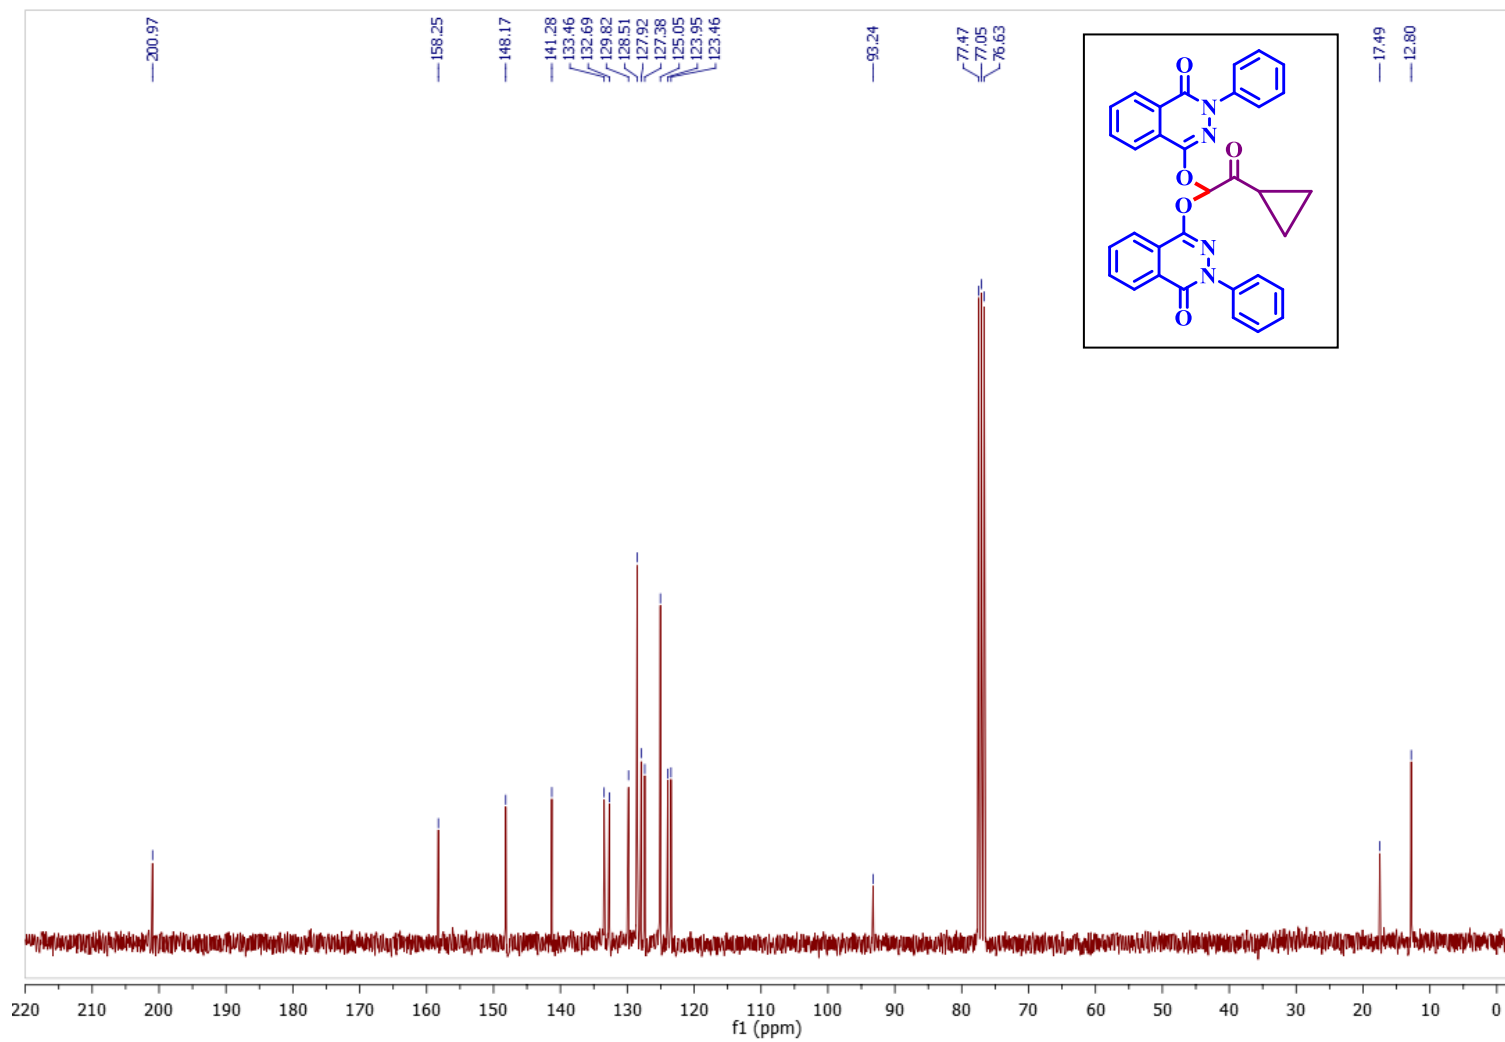

4,4'-((2-oxo-2-(p-tolyl)ethane-1,1-diyl)bis(oxy))bis(7-methyl-2-phenylphthalazin-1(2H)-one) (3r):  $^1\text{H}$  NMR (300 MHz,  $\text{CDCl}_3$ ):

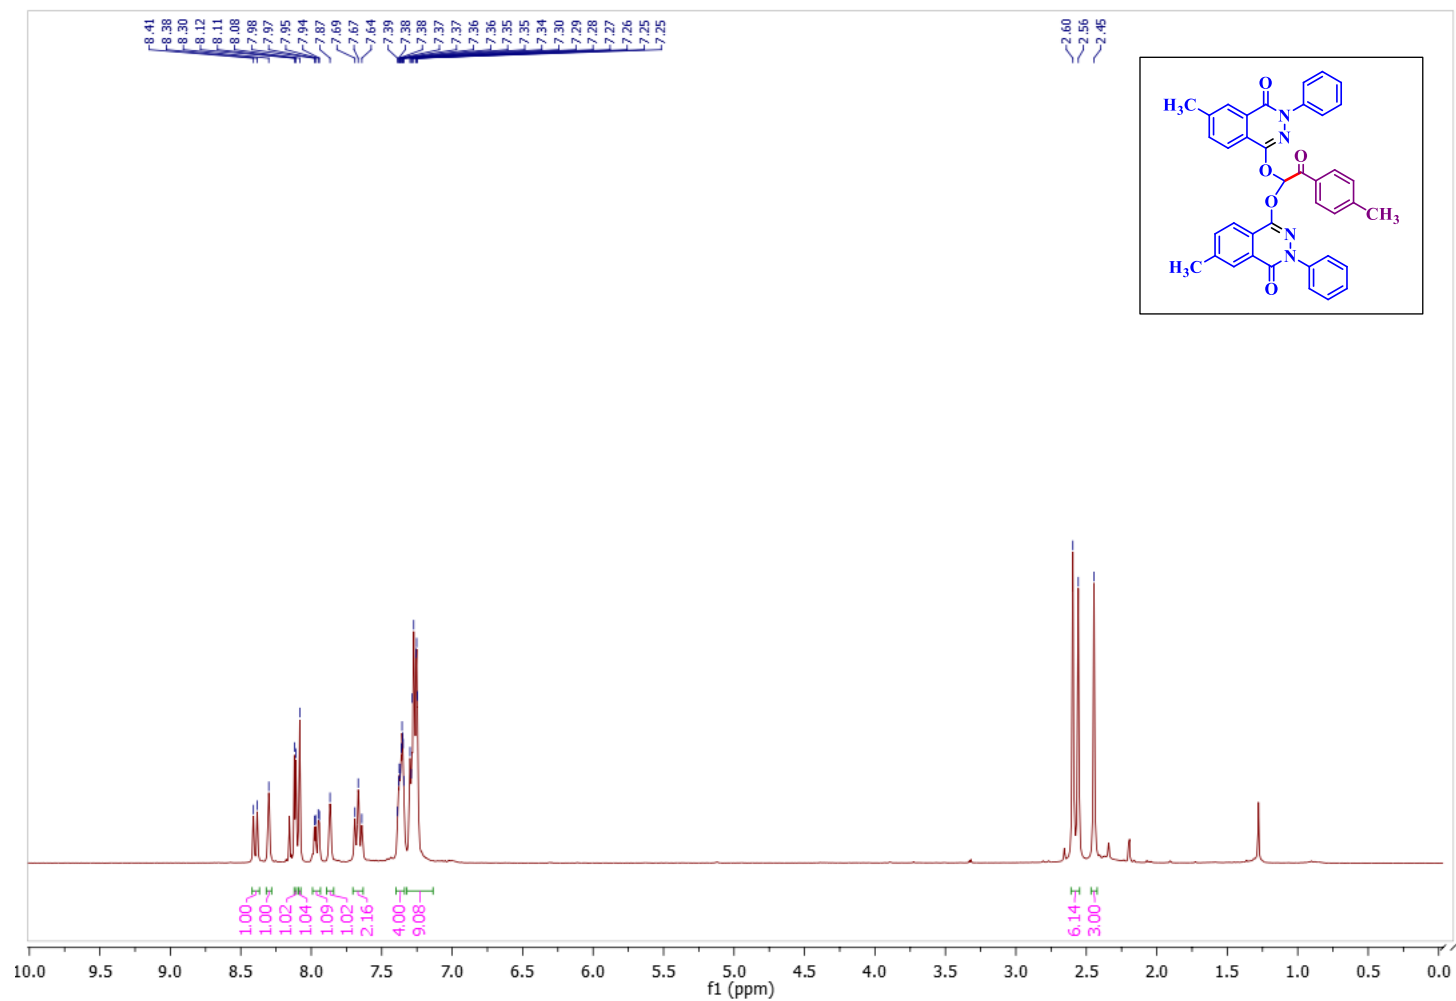

4,4'-((2-oxo-2-(p-tolyl)ethane-1,1-diyl)bis(oxy))bis(7-methyl-2-phenylphthalazin-1(2H)-one) (3r):  $^{13}\text{C}$  NMR (75 MHz,  $\text{CDCl}_3$ ):

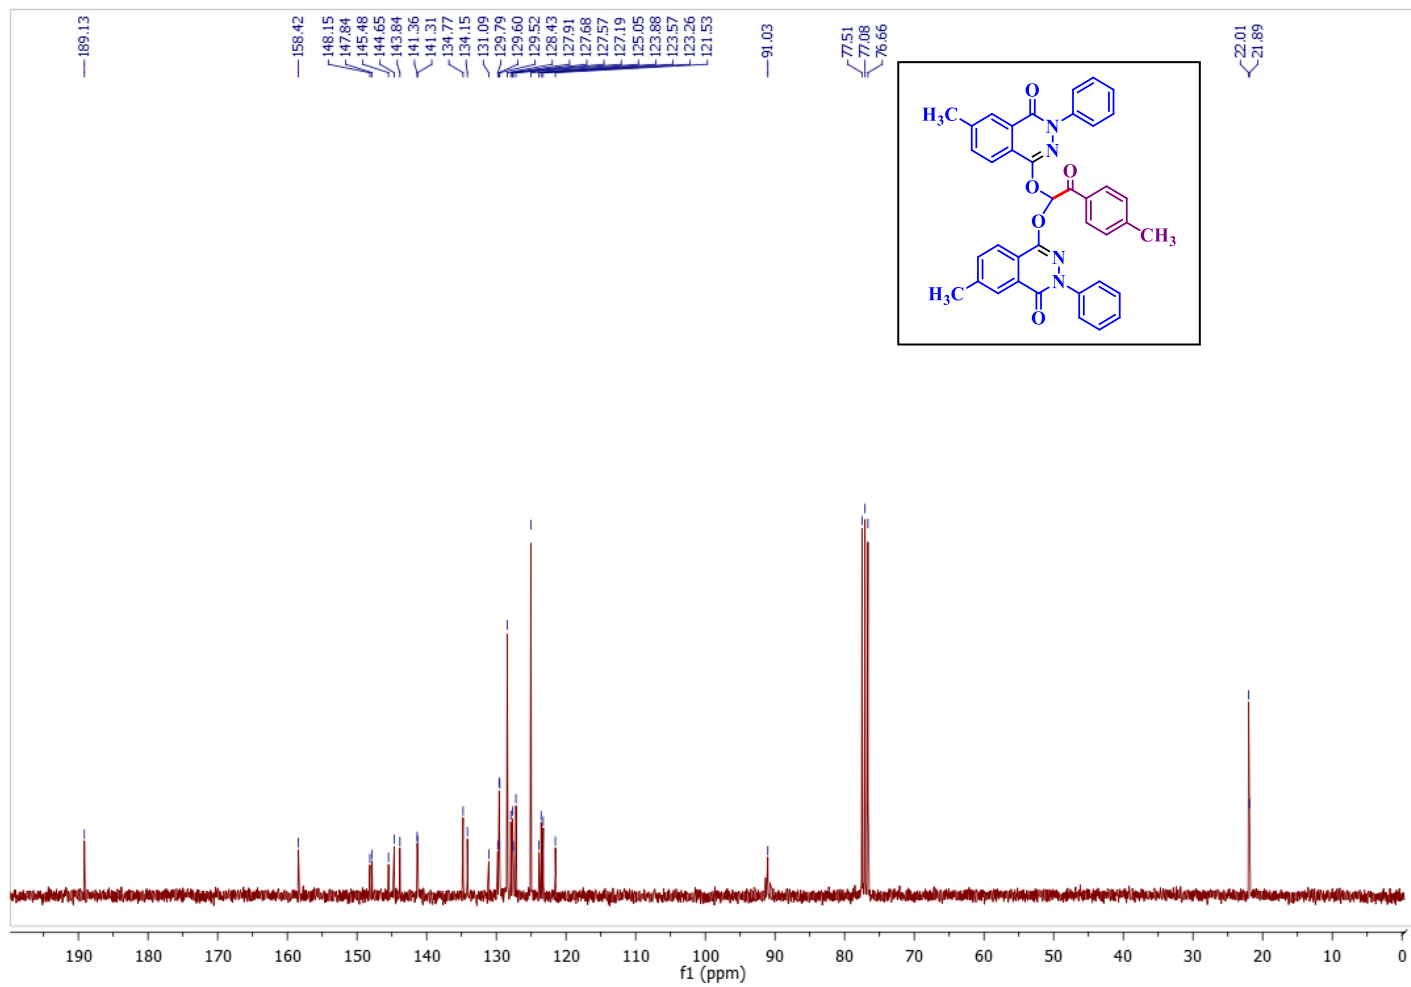

4,4'-((2-oxo-2-phenylethane-1,1-diyl)bis(oxy))bis(8-chloro-2-phenylphthalazin-1(2H)-one) (3s): <sup>1</sup>H NMR (300 MHz, CDCl<sub>3</sub>):

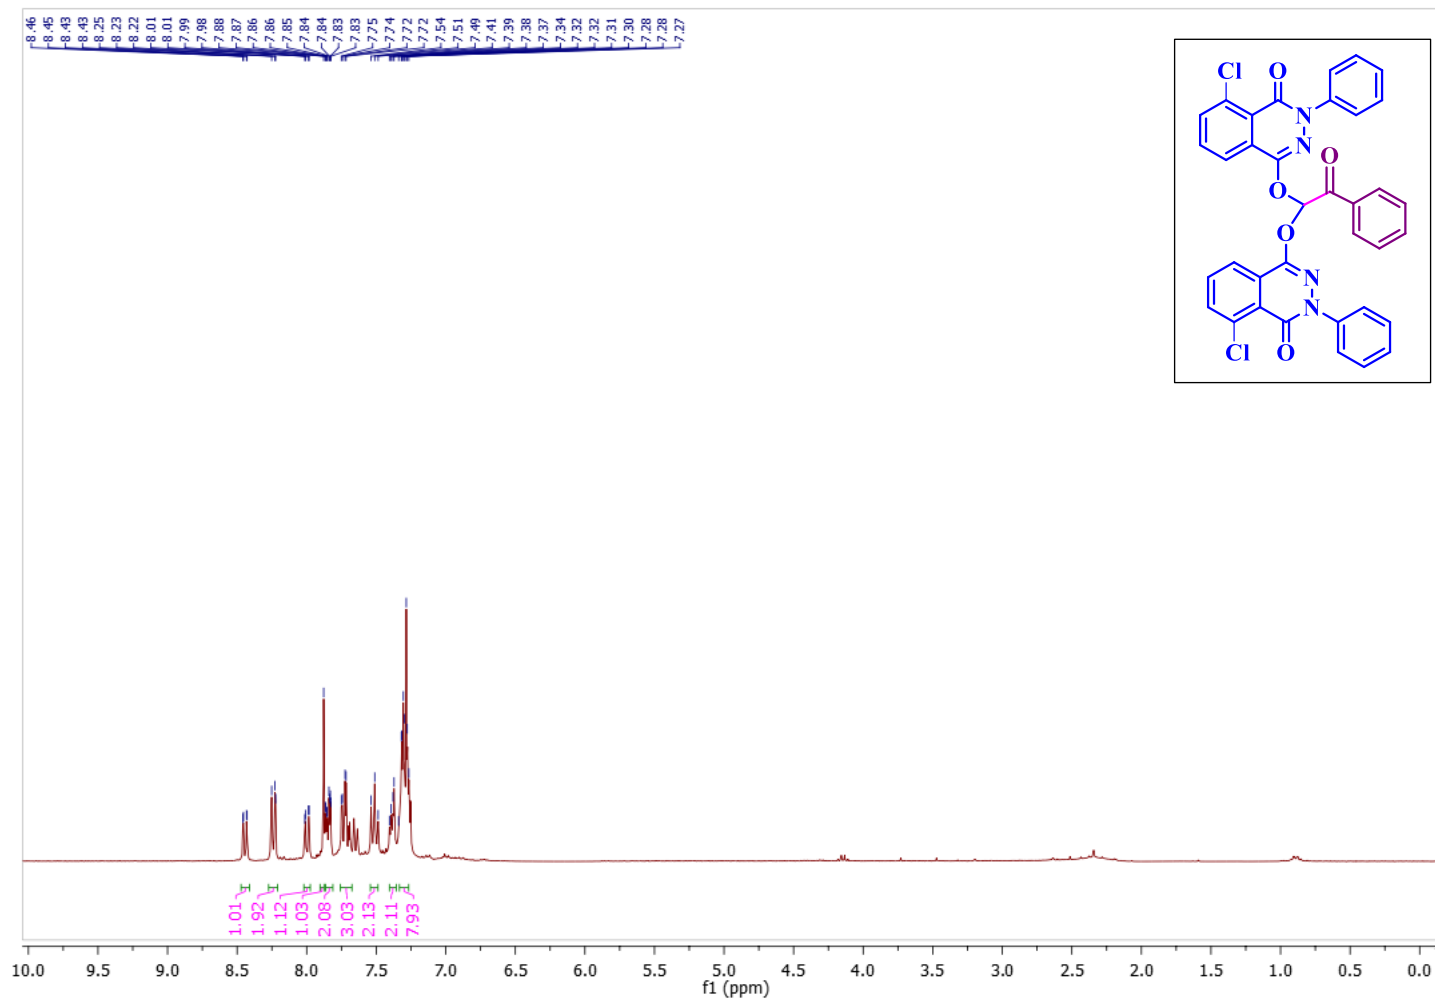

4,4'-((2-oxo-2-phenylethane-1,1-diyl)bis(oxy))bis(8-chloro-2-phenylphthalazin-1(2H)-one) (3s):  $^{13}\text{C}$  NMR (75 MHz,  $\text{CDCl}_3$ ):

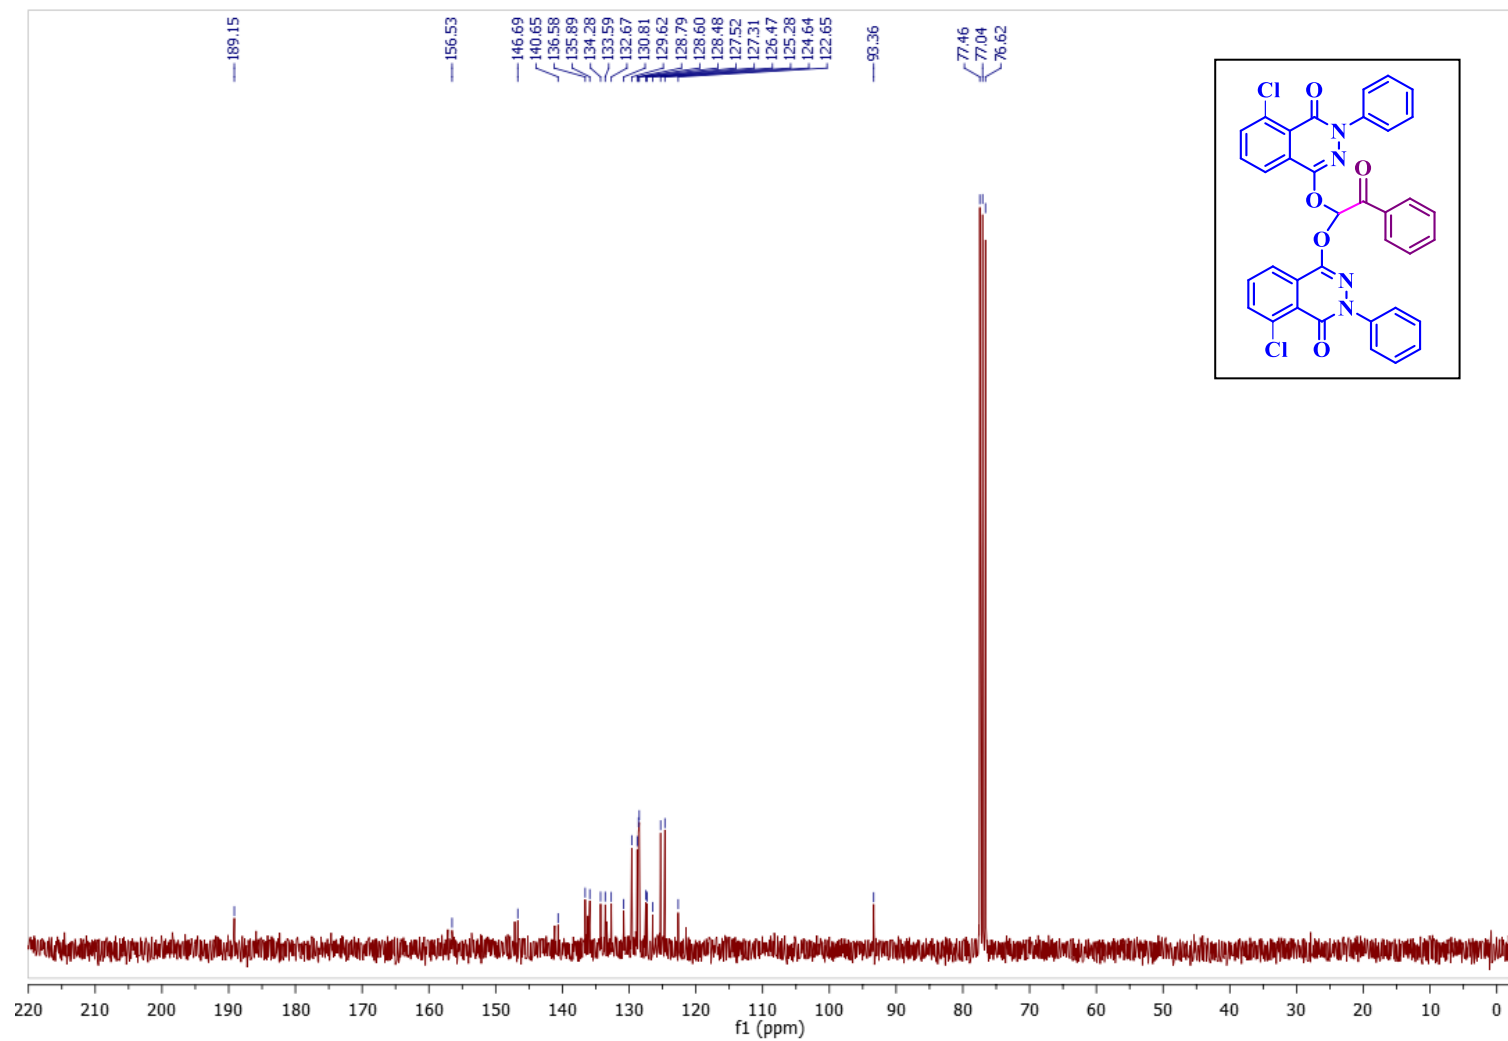



**4,4'-((2-oxo-2-(pyridin-2-yl)ethane-1,1-diyl)bis(oxy))bis(2 phenylphthalazin-1(2H)-one) (3t): <sup>1</sup>H NMR (300 MHz, CDCl<sub>3</sub>):**

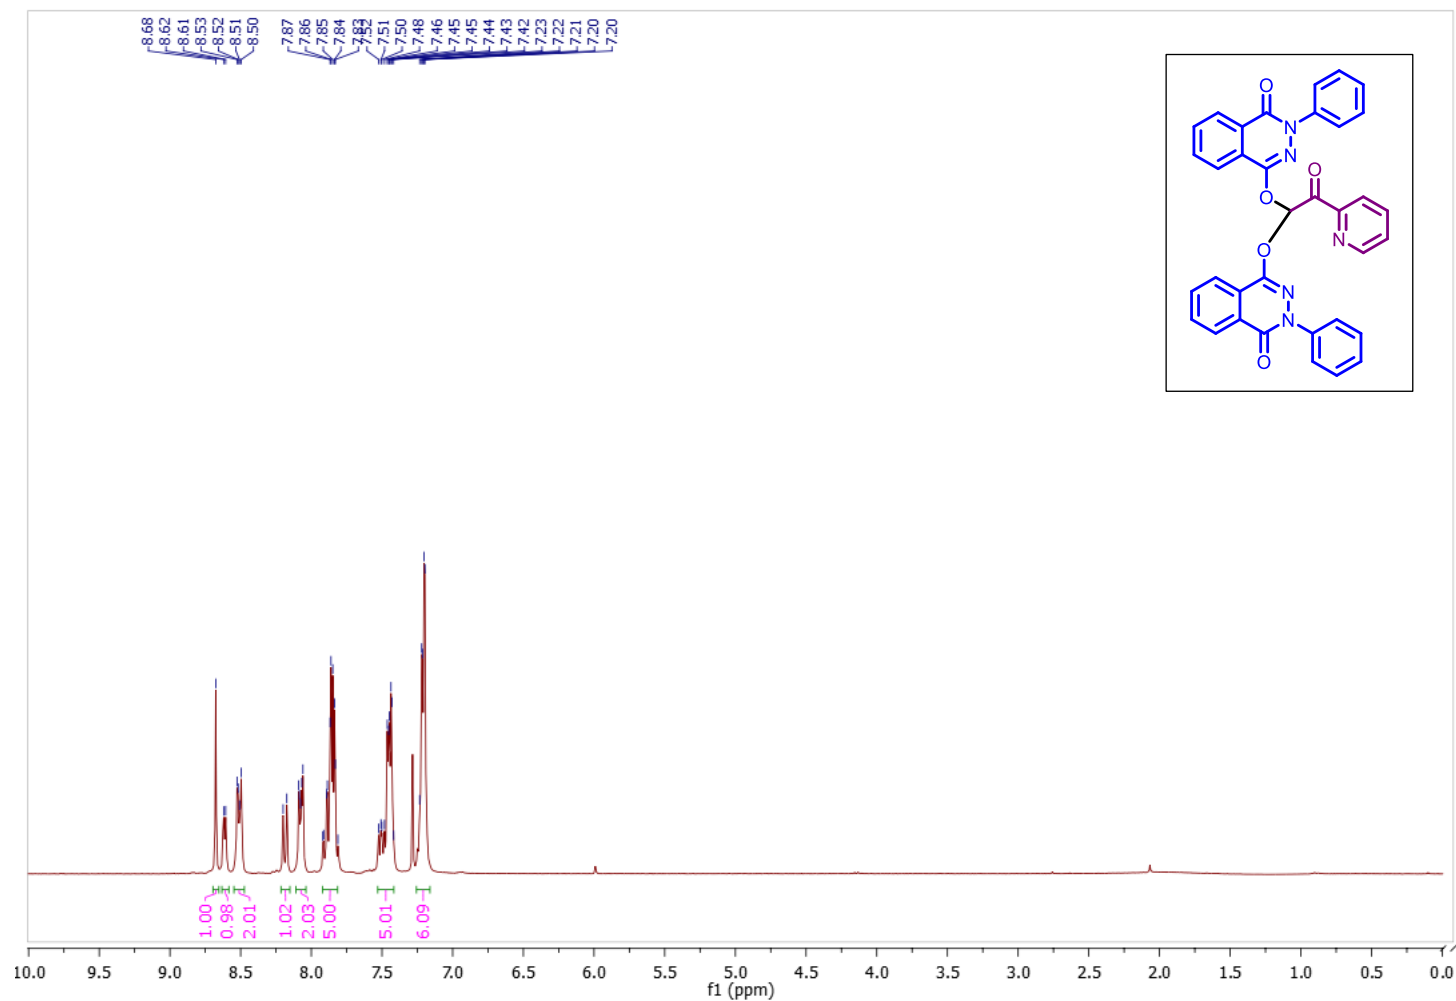

4,4'-((2-oxo-2-(pyridin-2-yl)ethane-1,1-diyl)bis(oxy))bis(2 phenylphthalazin-1(2H)-one) (3t):  $^{13}\text{C}$  NMR (75 MHz,  $\text{CDCl}_3$ ):

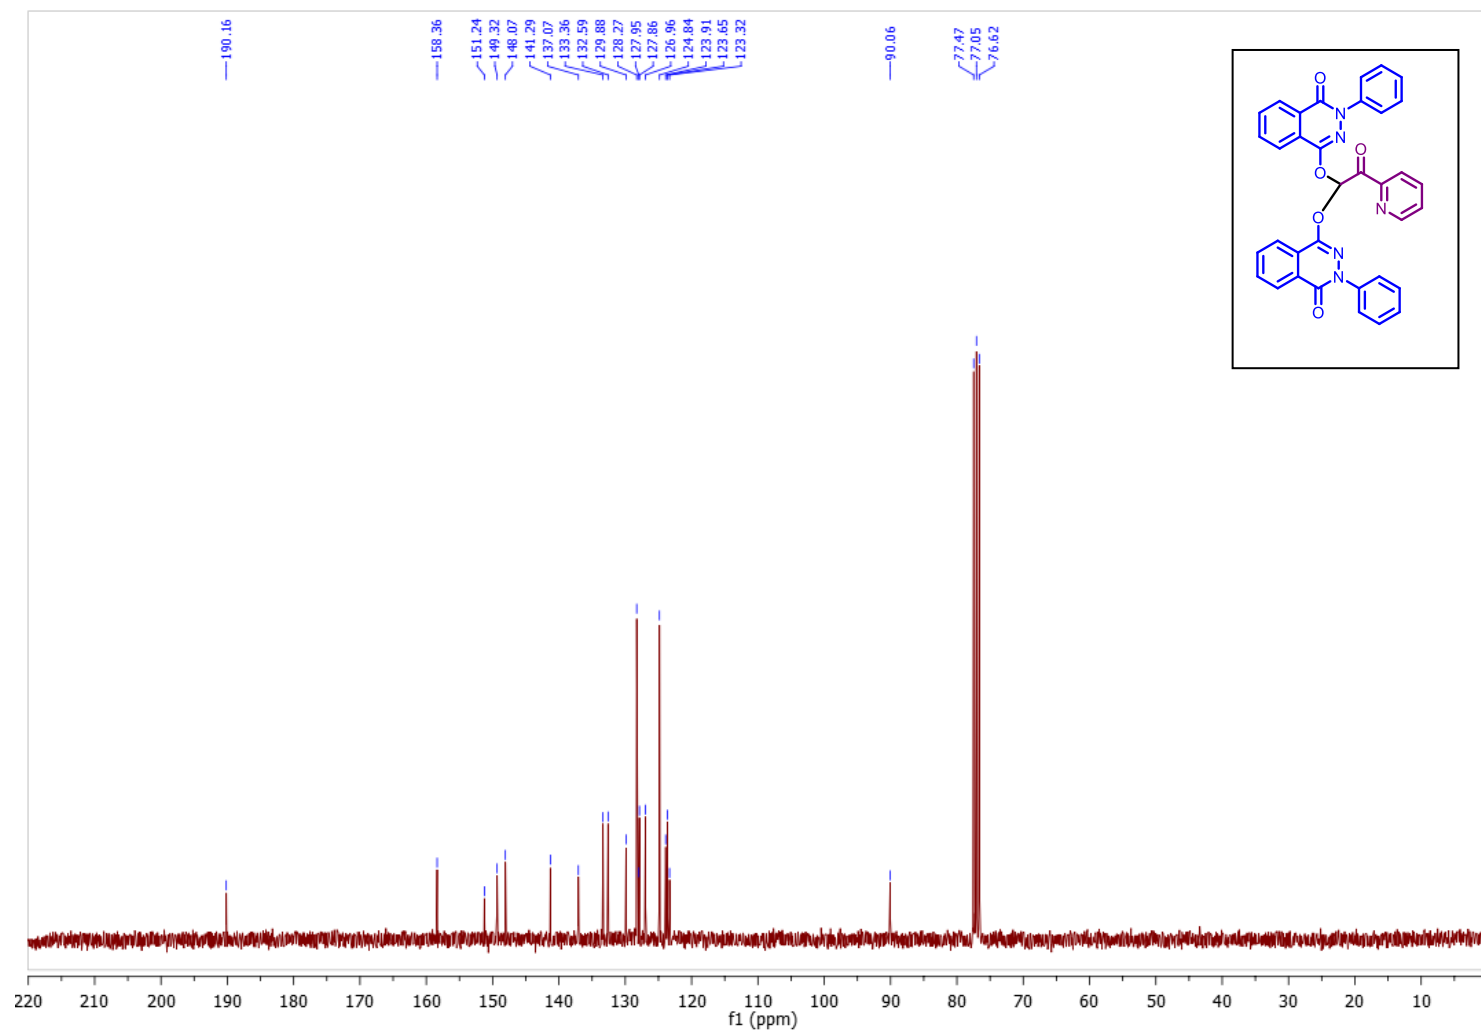

4,4'-((2-oxo-2-(2-oxo-2H-chromen-3-yl)ethane-1,1-diyl)bis(oxy))bis(2-phenylphthalazin-1(2H)-one) (3u): <sup>1</sup>H NMR (300 MHz, CDCl<sub>3</sub>):

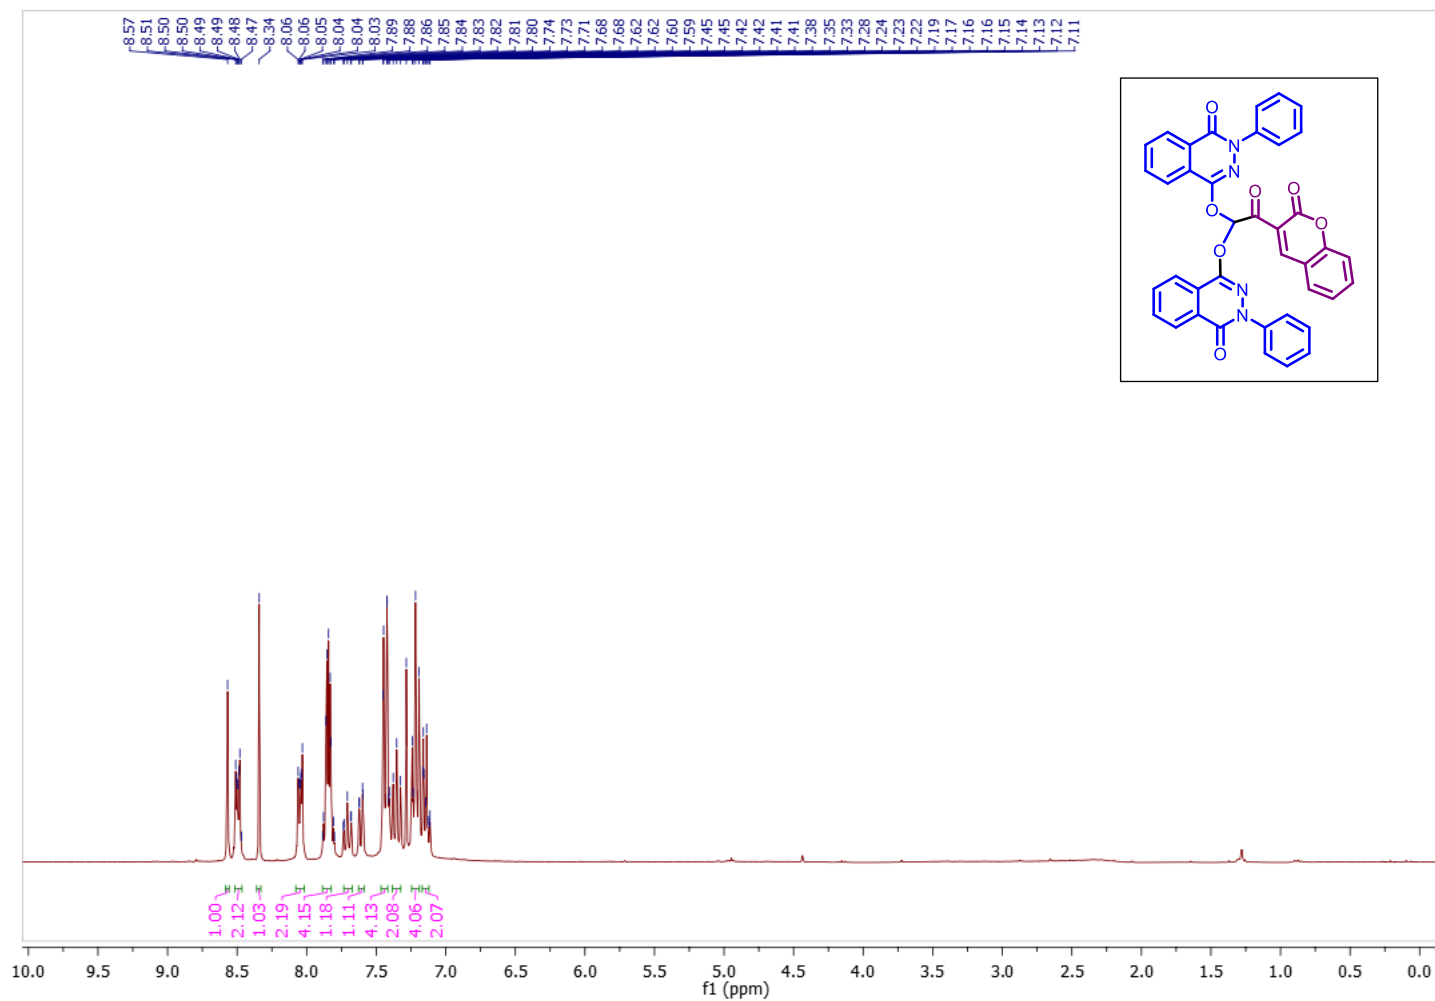

4,4'-((2-oxo-2-(2-oxo-2H-chromen-3-yl)ethane-1,1-diyl)bis(oxy))bis(2-phenylphthalazin-1(2H)-one) (3u):  $^{13}\text{C}$  NMR (75 MHz,  $\text{CDCl}_3$ ):

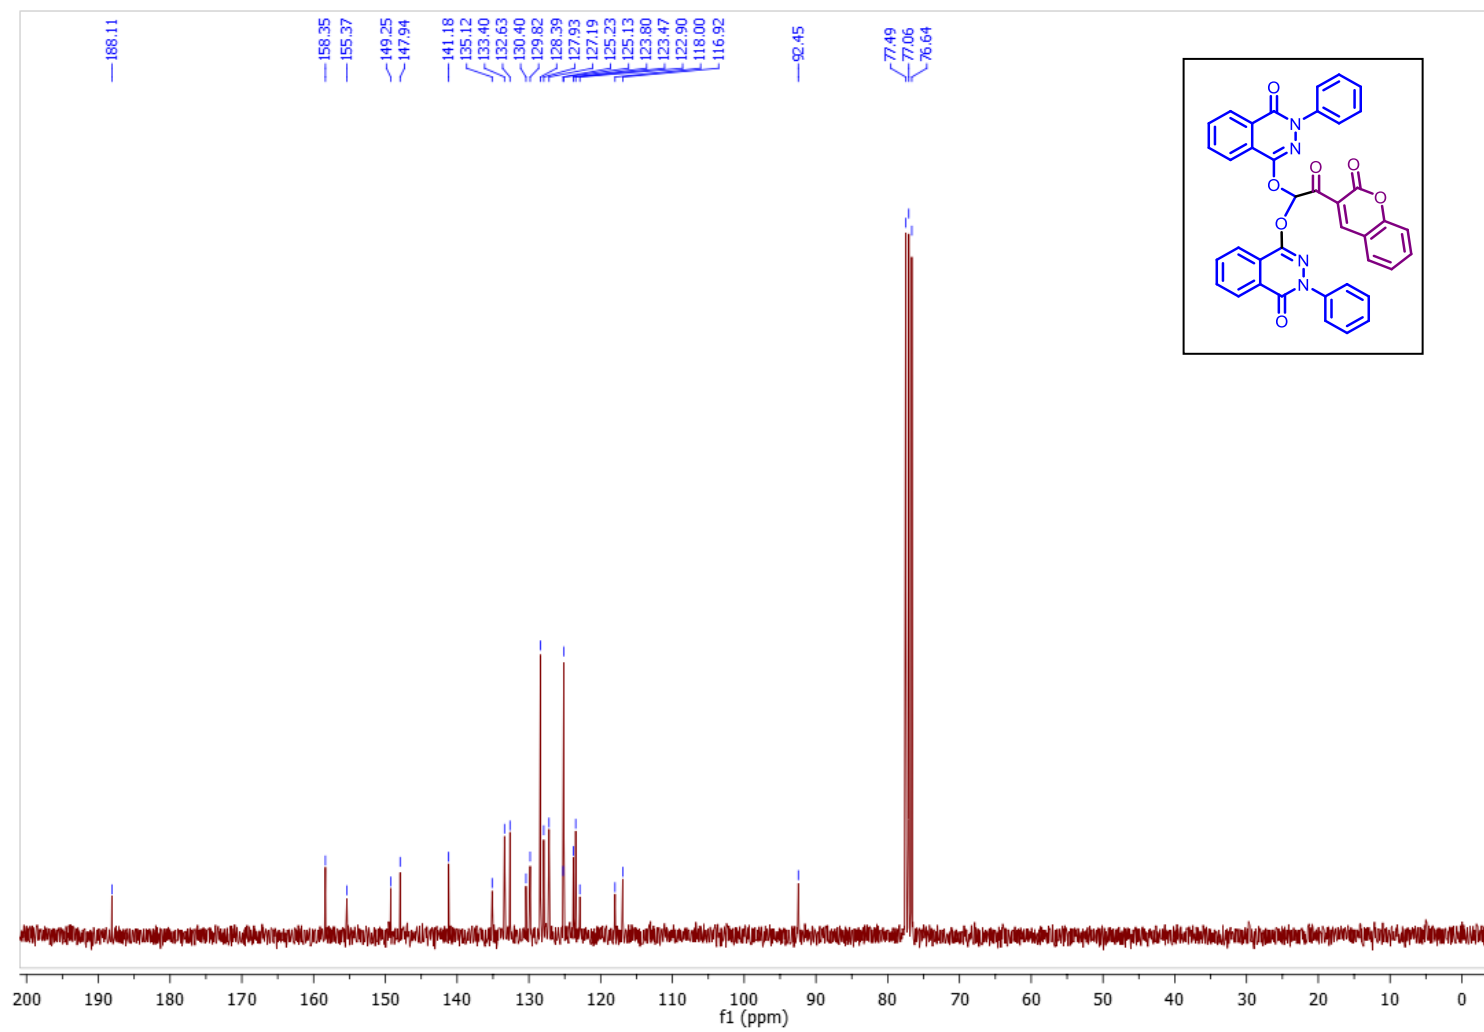

4,4'-((4-methyl-2-oxopentane-1,1-diyl)bis(oxy))bis(2-phenylphthalazin-1(2H)-one) (3v): <sup>1</sup>H NMR (300 MHz, CDCl<sub>3</sub>):

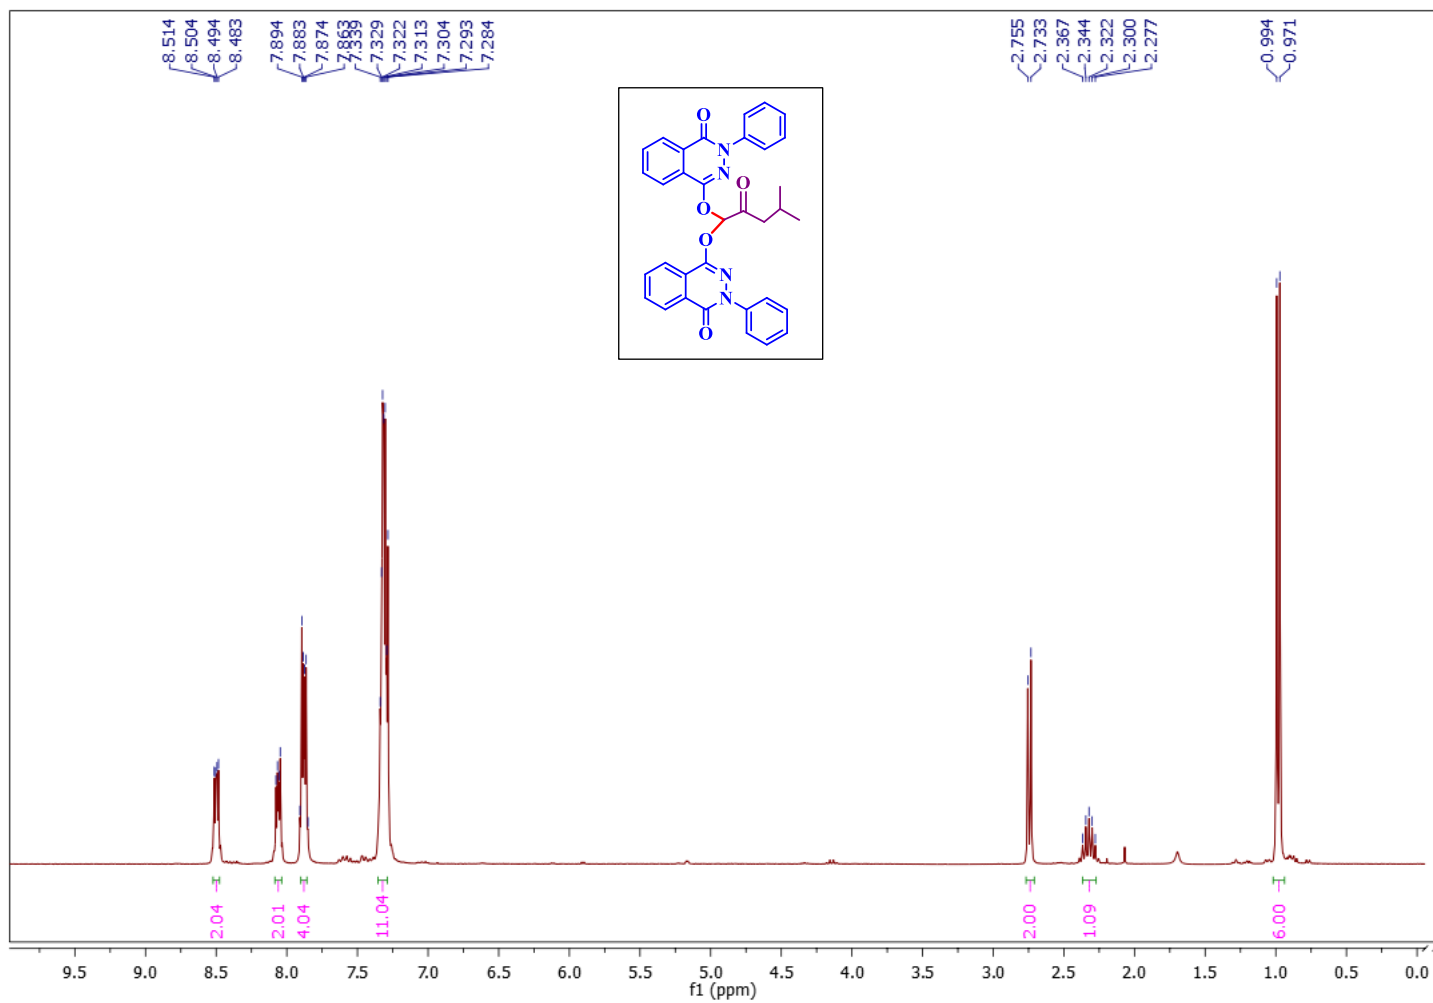

4,4'-((4-methyl-2-oxopentane-1,1-diyl)bis(oxy))bis(2-phenylphthalazin-1(2H)-one) (3v):  $^{13}\text{C}$  NMR (75 MHz,  $\text{CDCl}_3$ ):

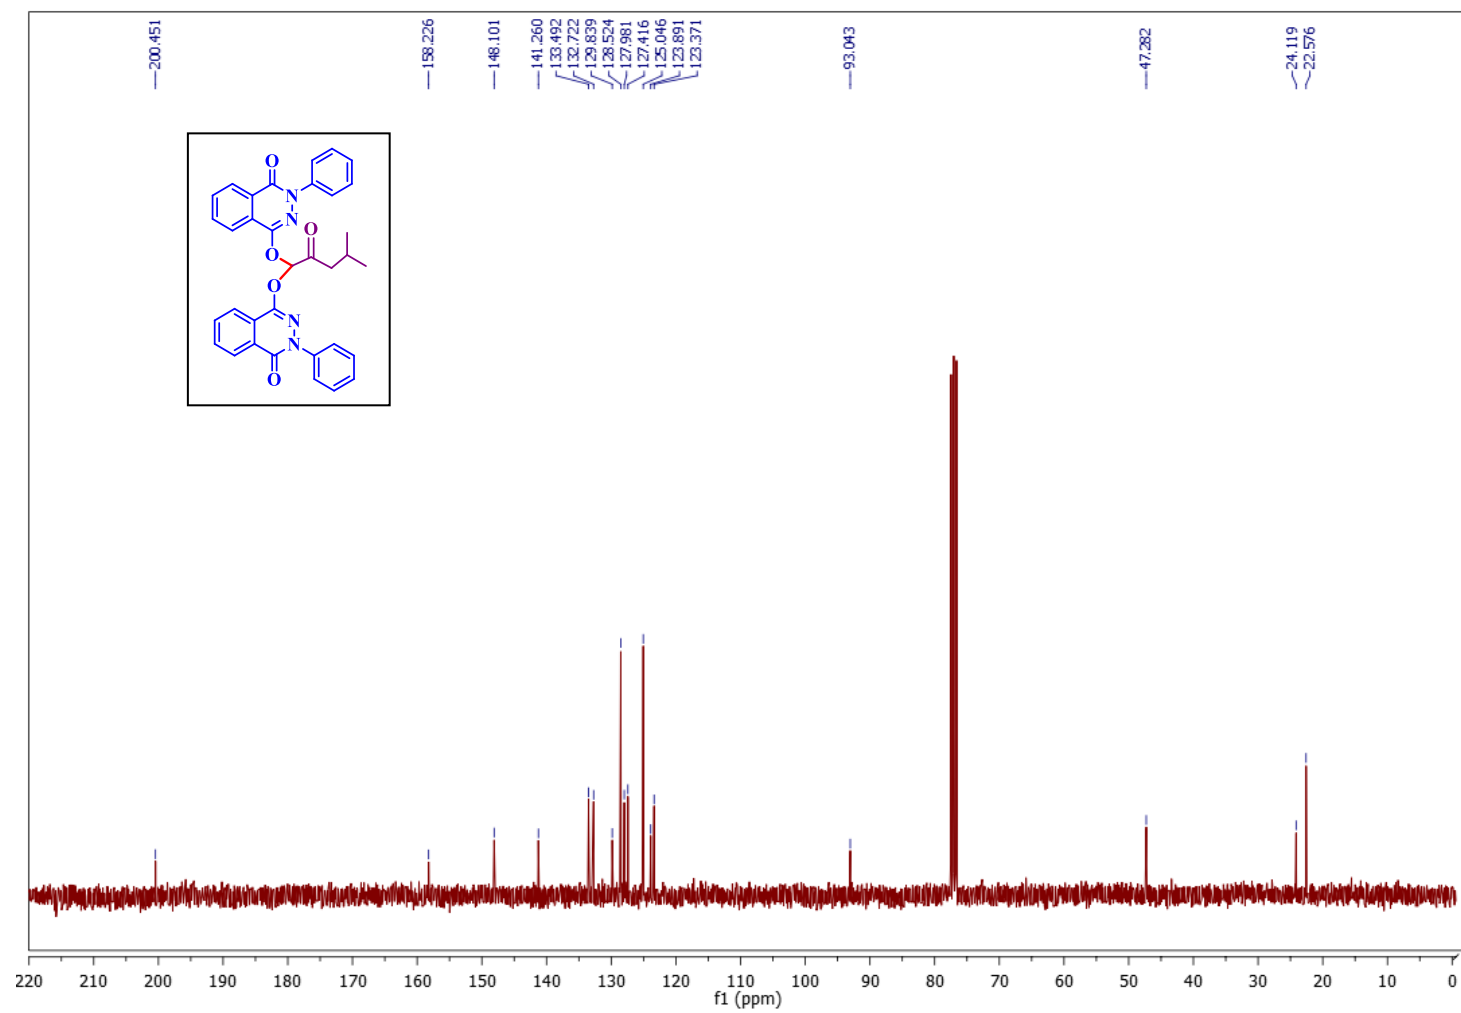

4,4'-((2-(4-(methylsulfonyl)phenyl)-2-oxoethane-1,1-diyl)bis(oxy))bis(2-phenylphthalazin-1(2H)-one) (3w): <sup>1</sup>H NMR (300 MHz, CDCl<sub>3</sub>):

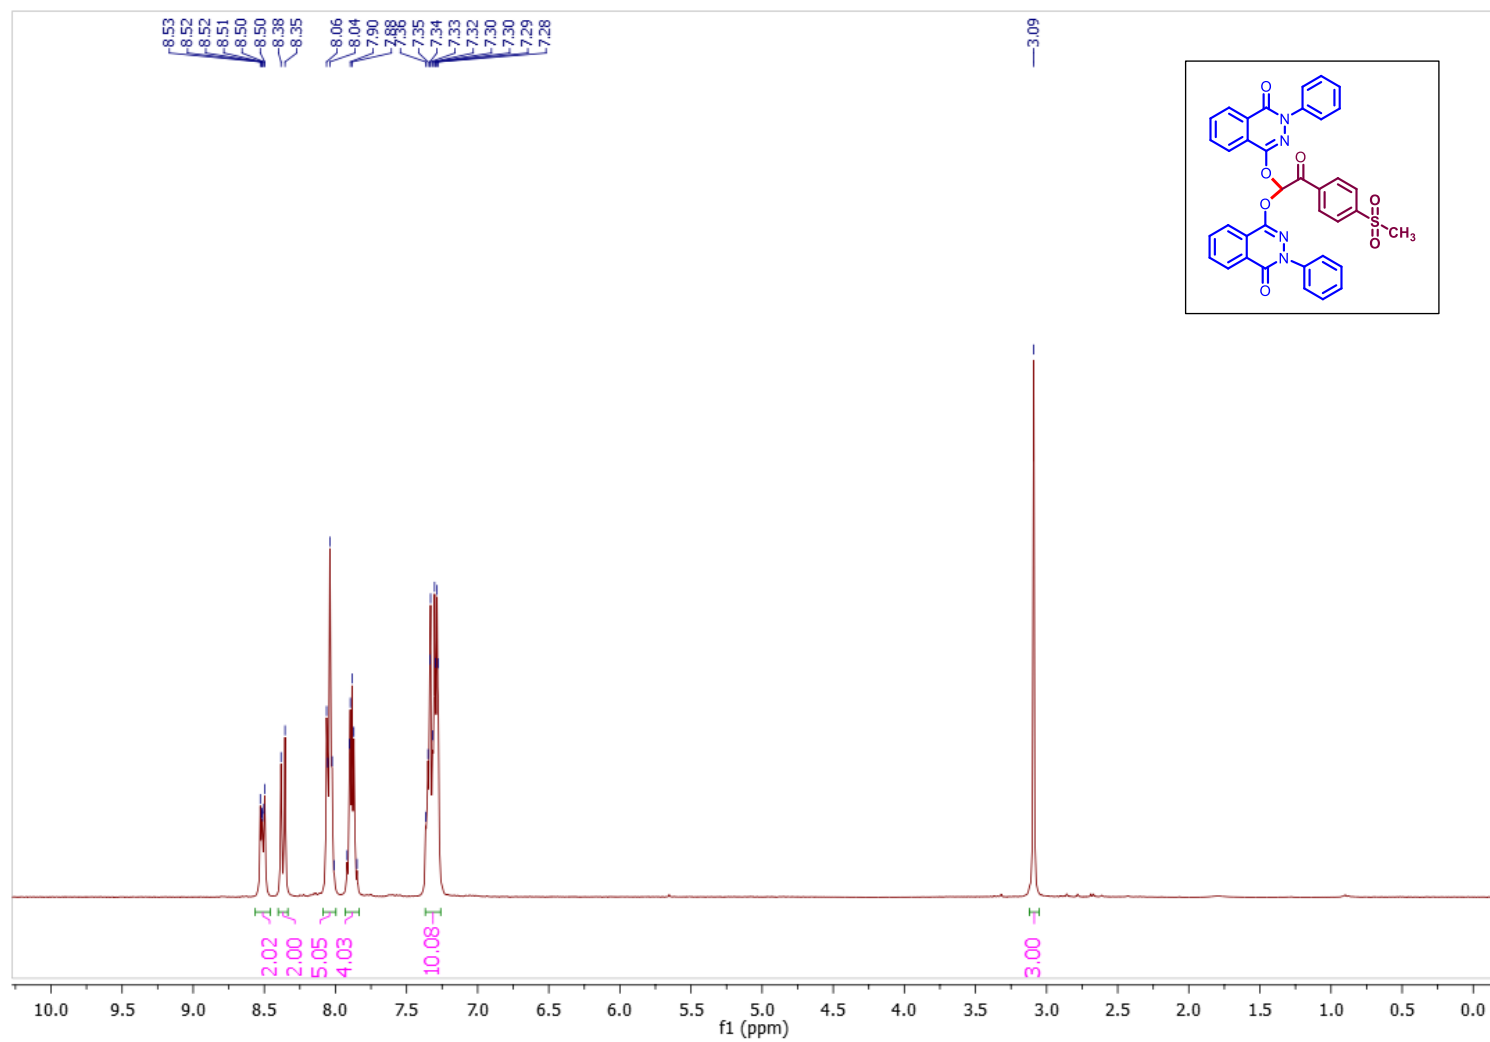

4,4'-((2-(4-(methylsulfonyl)phenyl)-2-oxoethane-1,1-diyl)bis(oxy))bis(2-phenylphthalazin-1(2H)-one) (3w):  $^{13}\text{C}$  NMR (75 MHz,  $\text{CDCl}_3$ ):

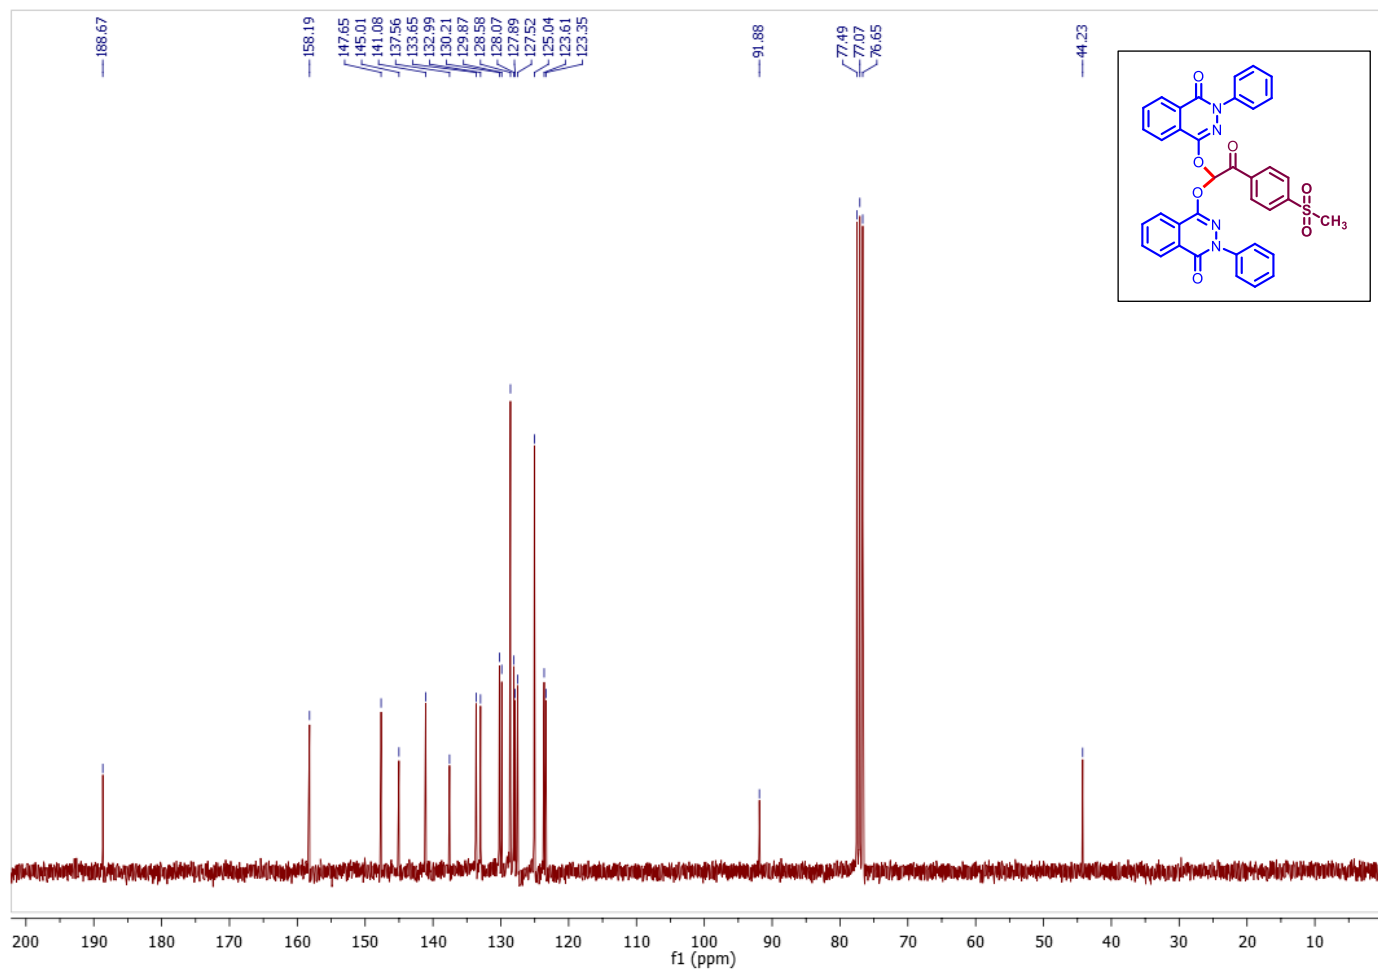



4,4'-((2-(4-acetylphenyl)-2-oxoethane-1,1-diyl)bis(oxy))bis(2-phenylphthalazin-1(2H)-one) (3x):  $^1\text{H}$  NMR (300 MHz,  $\text{CDCl}_3$ ):

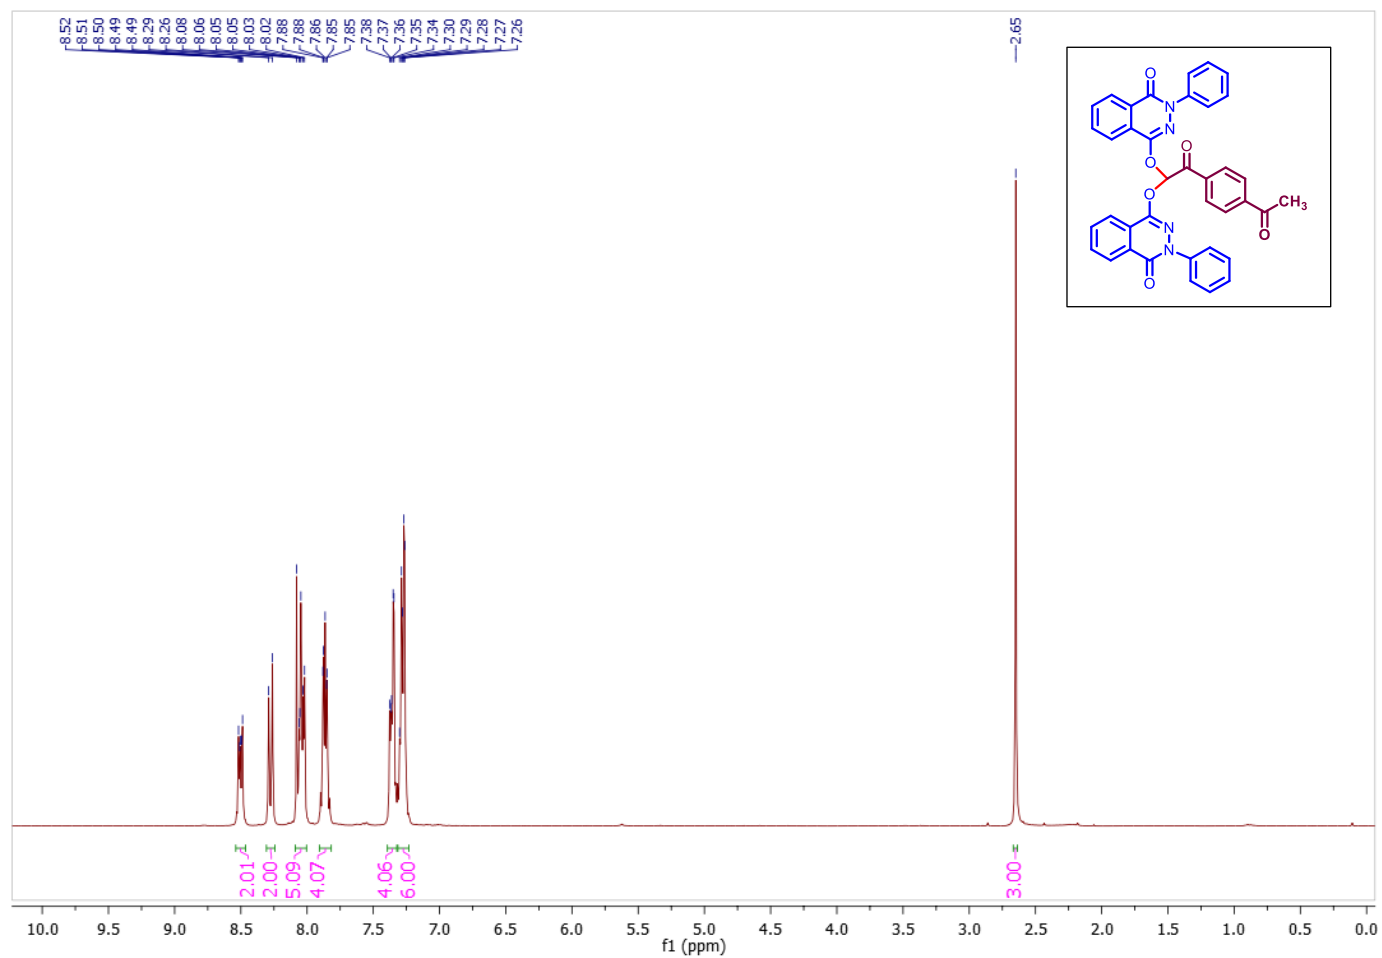

4,4'-((2-(4-acetylphenyl)-2-oxoethane-1,1-diyl)bis(oxy))bis(2-phenylphthalazin-1(2H)-one) (3x): <sup>13</sup>C NMR (75 MHz, CDCl<sub>3</sub>):

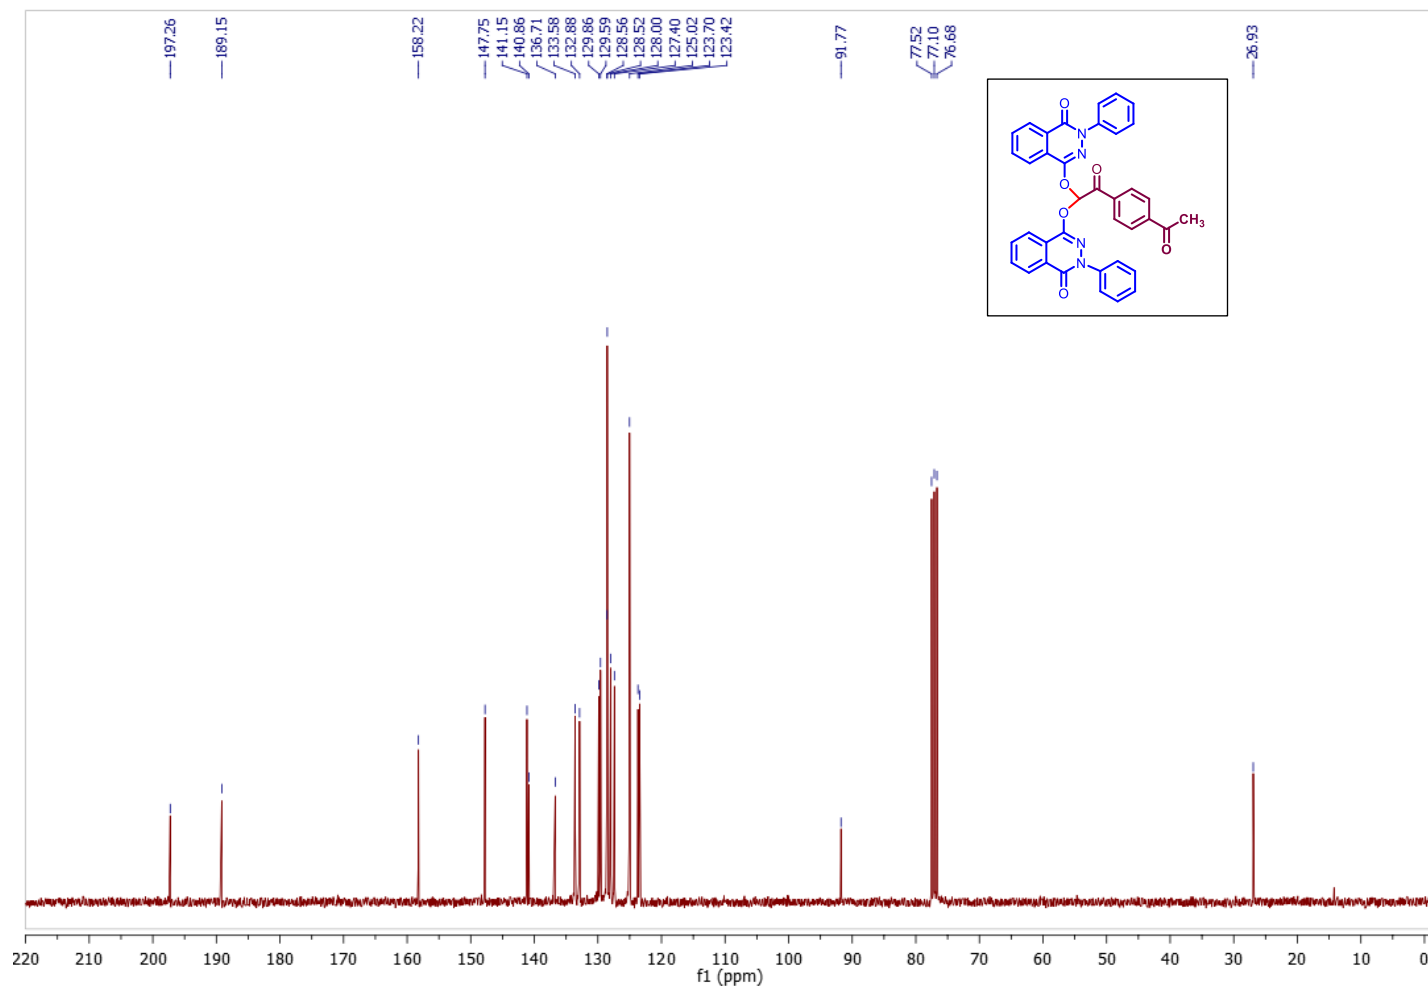

**4,4'-((nitromethylene)bis(oxy))bis(2-phenylphthalazin-1(2H)-one) (3y): <sup>1</sup>H NMR (300 MHz, CDCl<sub>3</sub>):**

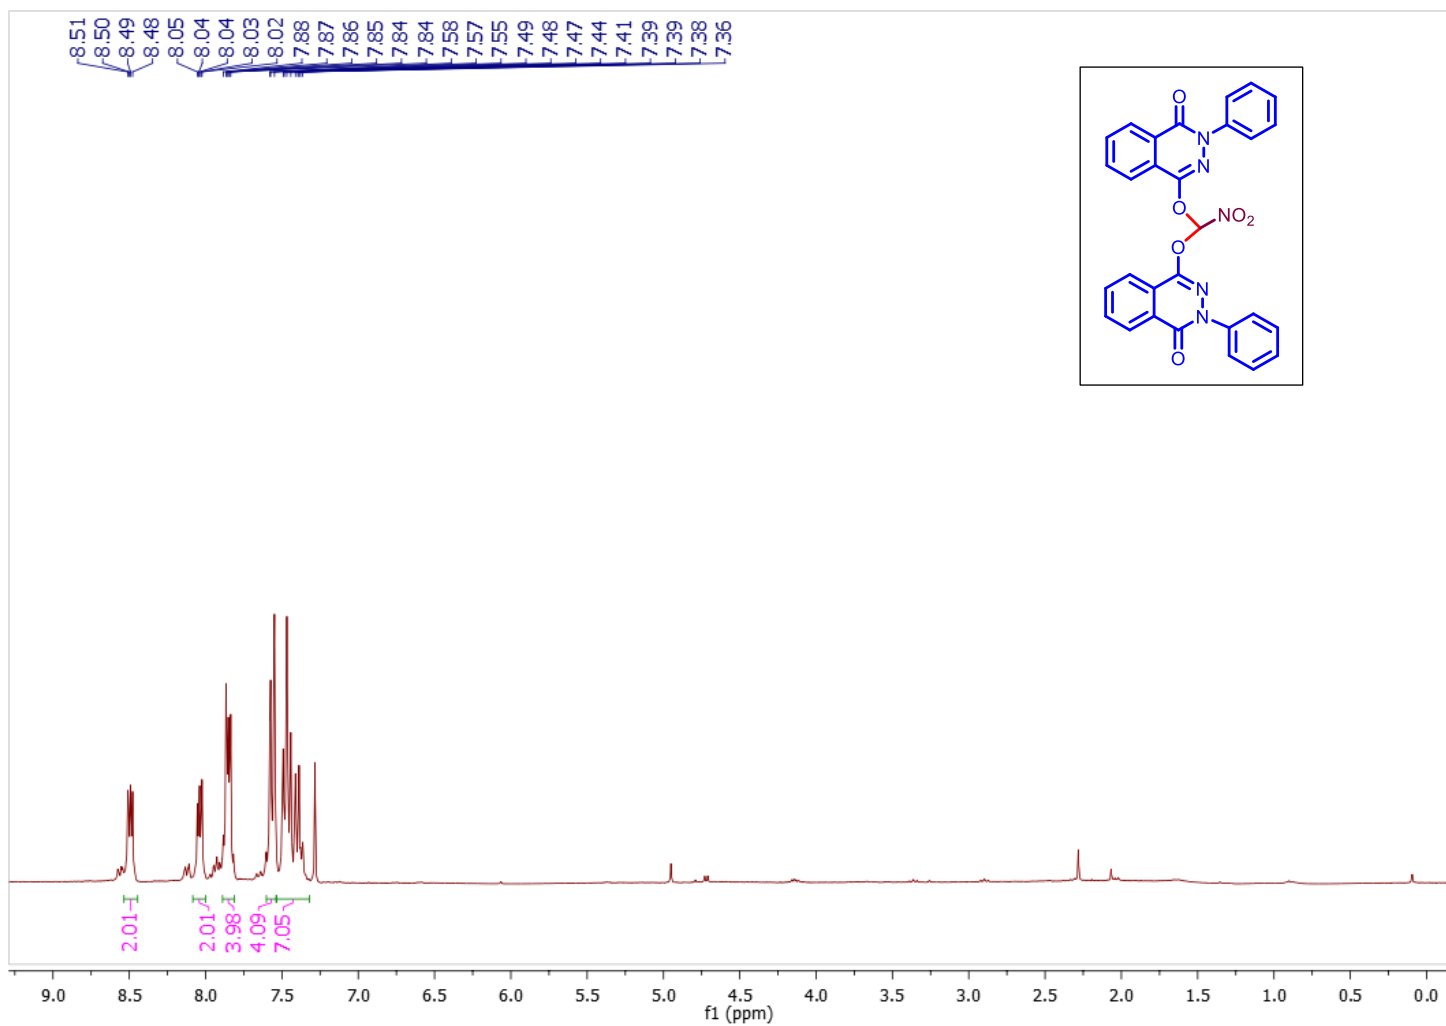

4,4'-((nitromethylene)bis(oxy))bis(2-phenylphthalazin-1(2H)-one) (3y):  $^{13}\text{C}$  NMR (75 MHz,  $\text{CDCl}_3$ ):

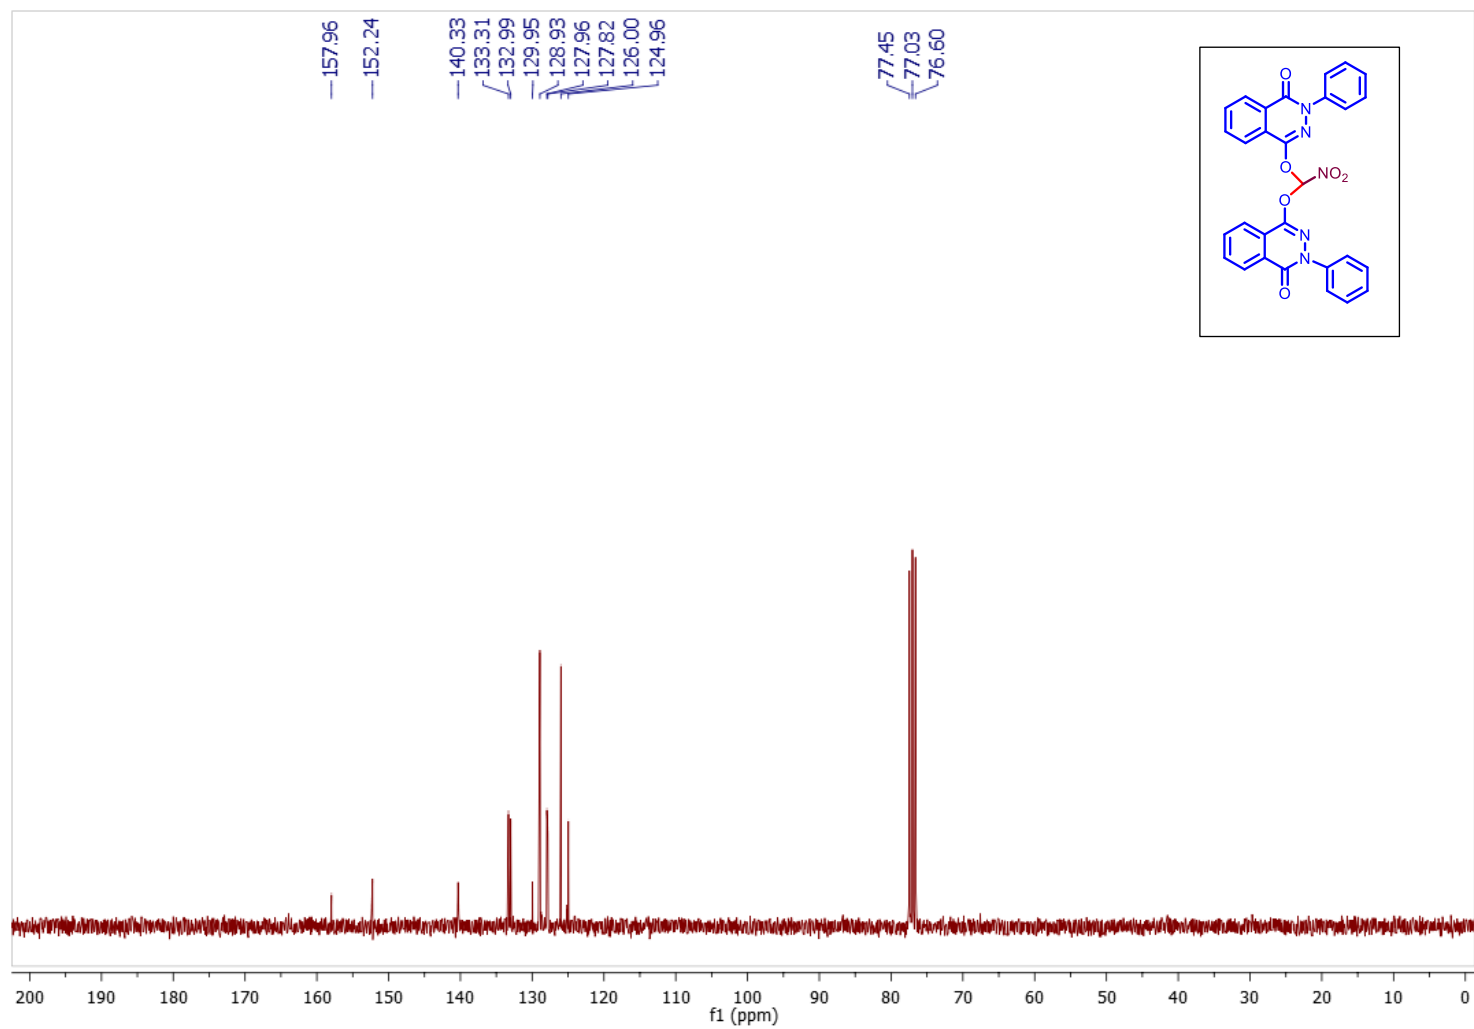

4,4'-((2-oxo-2-(4-(phenylethynyl)phenyl)ethane-1,1-diyl)bis(oxy))bis(2-phenylphthalazin-1(2H)-one) (3z):  $^1\text{H}$  NMR (300 MHz,  $\text{CDCl}_3$ ):

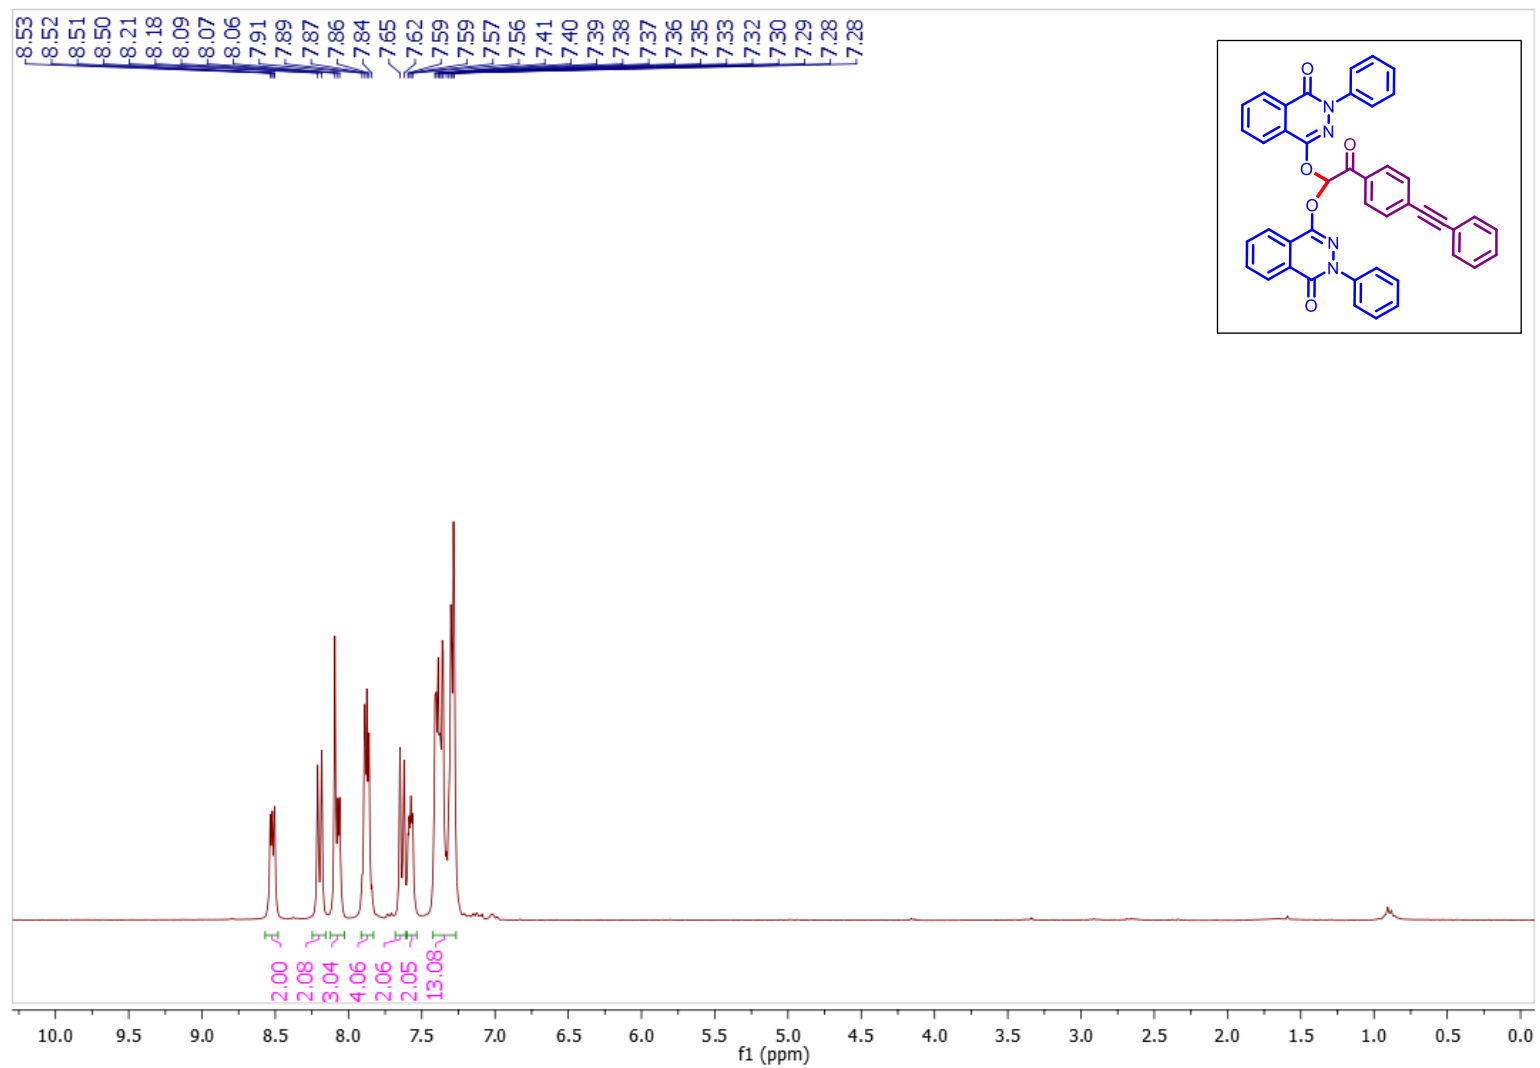

4,4'-((2-oxo-2-(4-(phenylethynyl)phenyl)ethane-1,1-diyl)bis(oxy))bis(2-phenylphthalazin-1(2H)-one) (**3z**):  $^{13}\text{C}$  NMR (75 MHz,  $\text{CDCl}_3$ ):

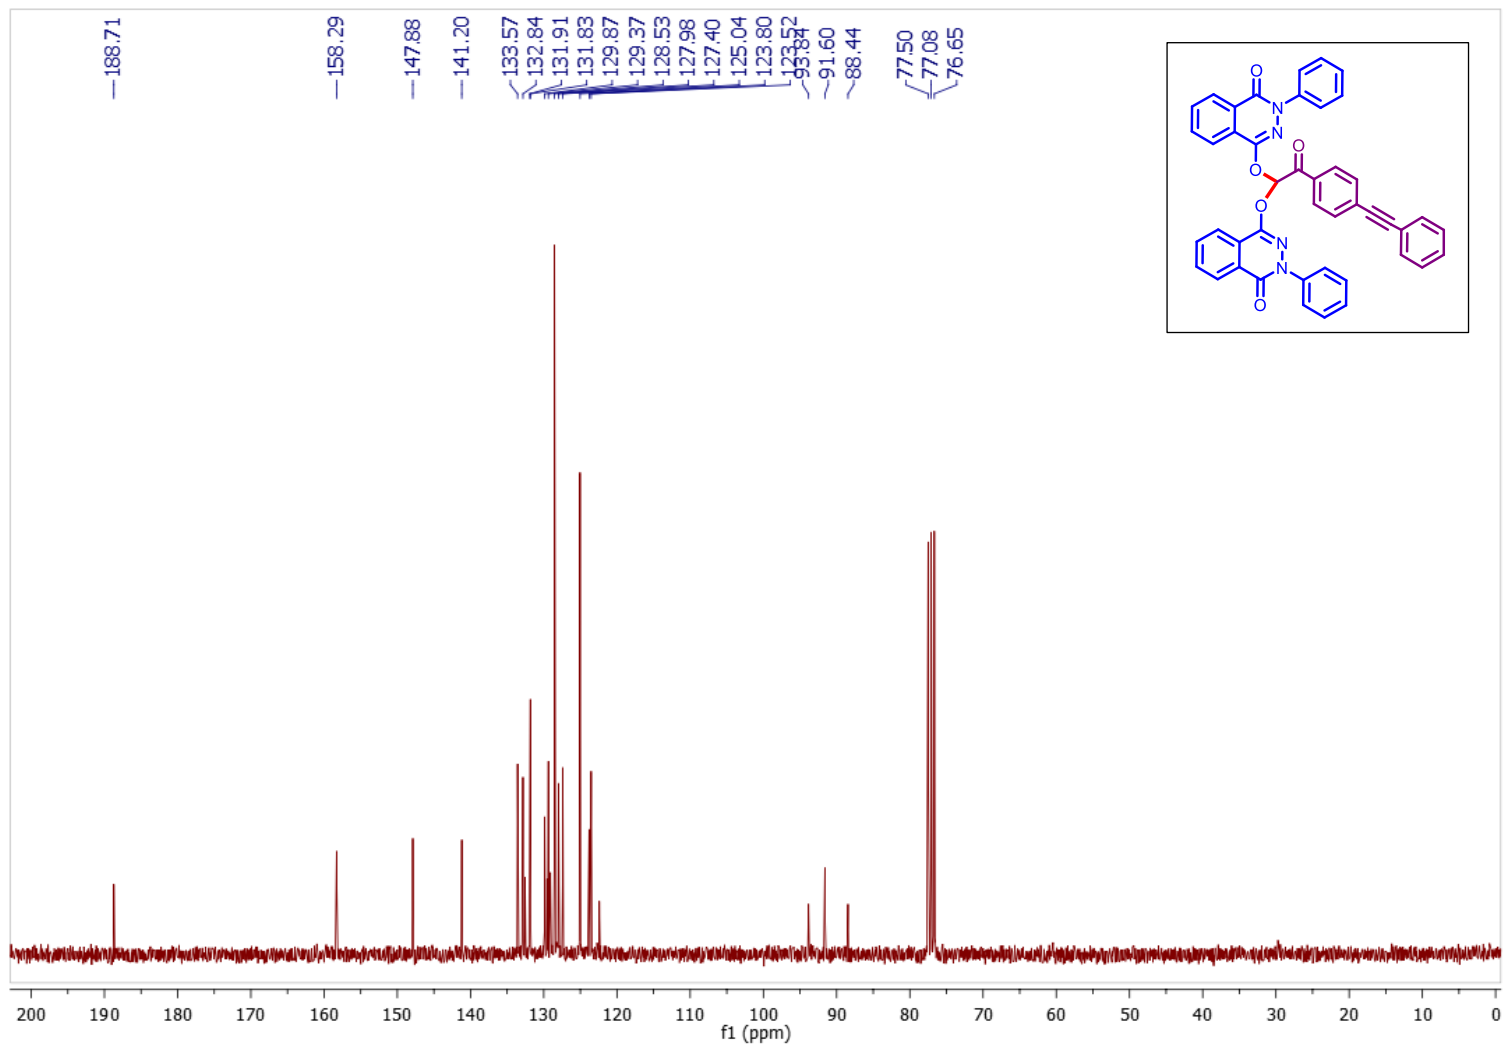

2,2-bis((5-bromopyridin-2-yl)oxy)-1-(4-nitrophenyl)ethan-1-one (3za): <sup>1</sup>H NMR (300 MHz, CDCl<sub>3</sub>):

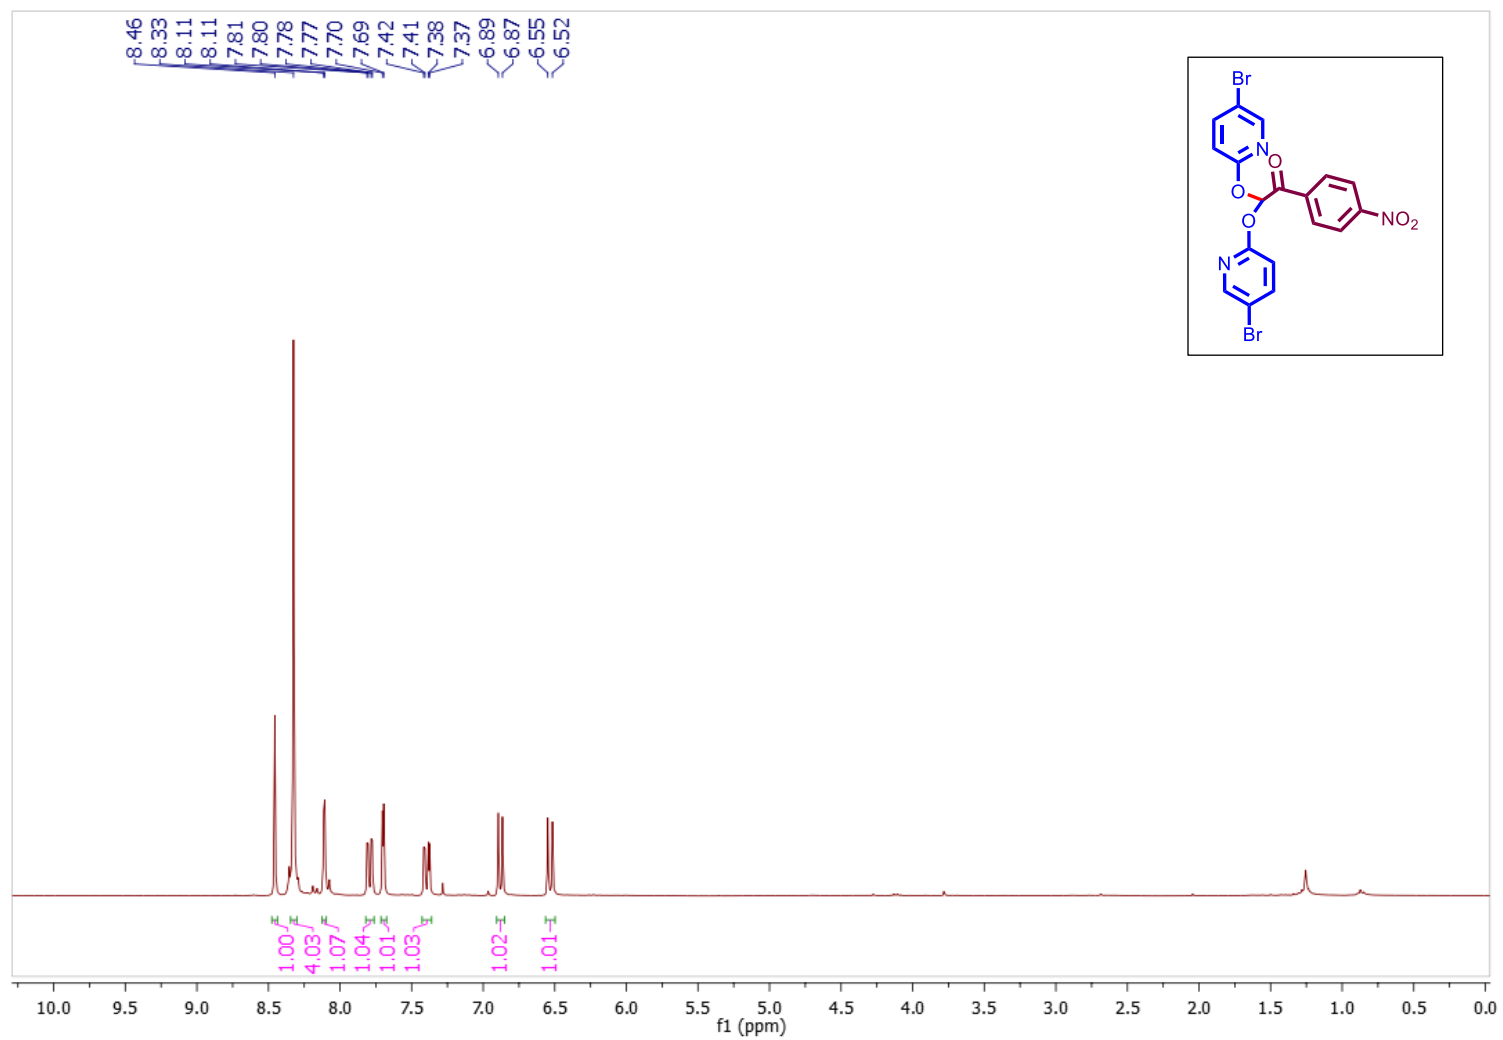

2,2-bis((5-bromopyridin-2-yl)oxy)-1-(4-nitrophenyl)ethan-1-one (3za):  $^1\text{H}$  NMR (300 MHz,  $\text{CDCl}_3$ ):  $^{13}\text{C}$  NMR (75 MHz,  $\text{CDCl}_3$ ):

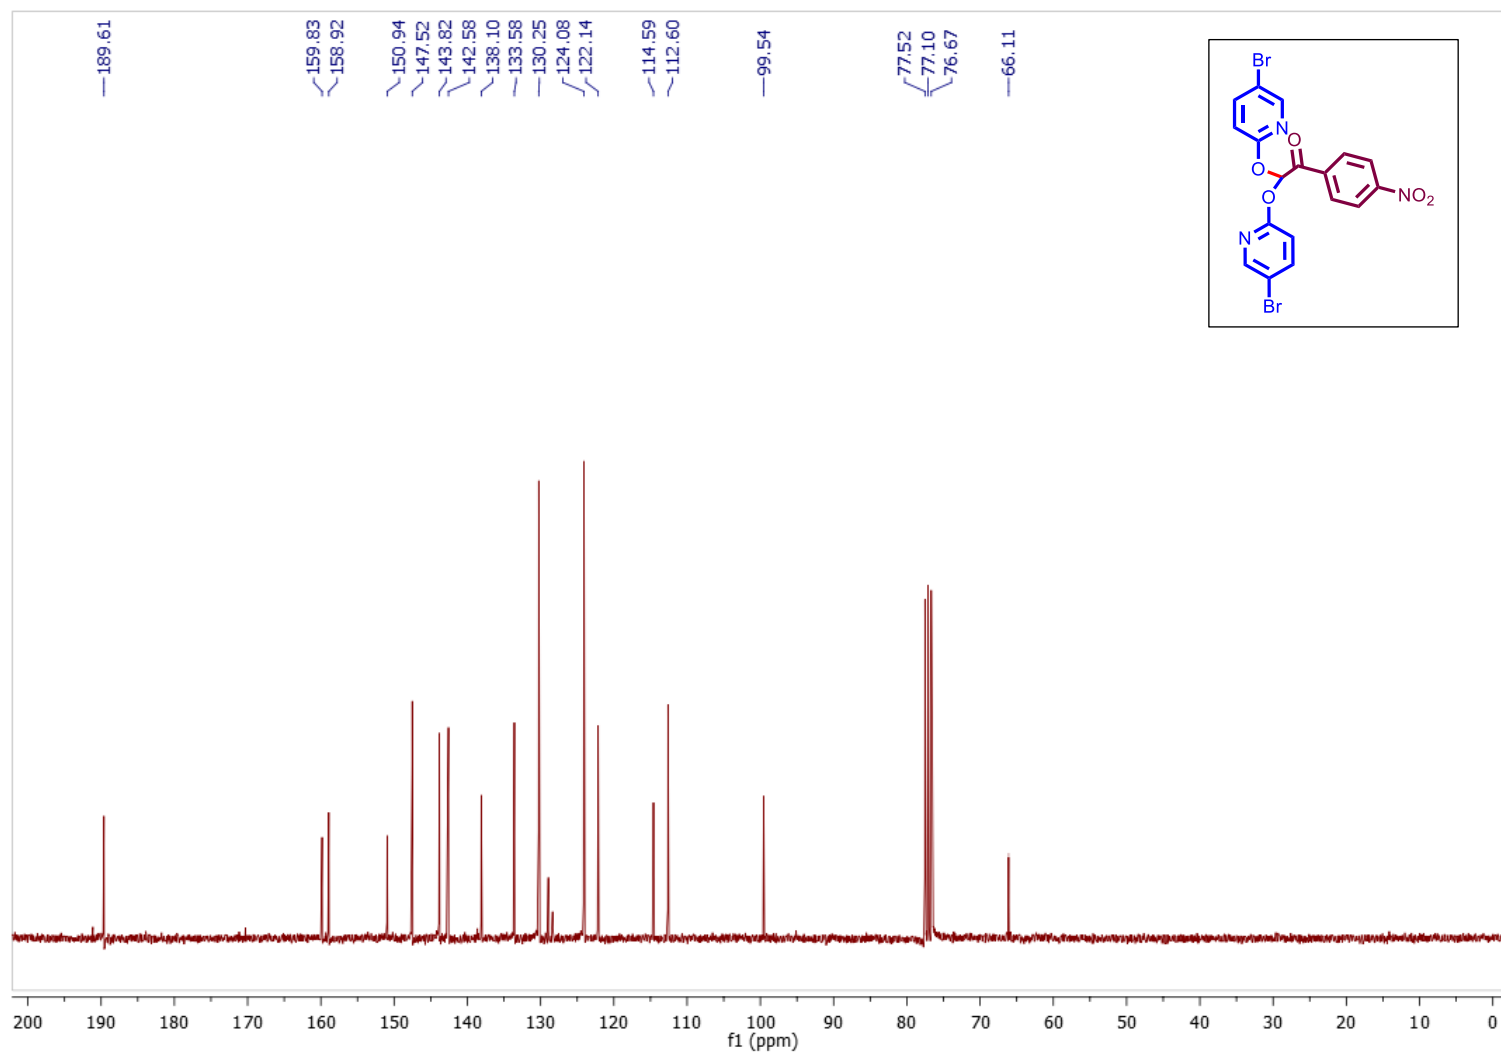



2,2-bis((5-bromopyridin-2-yl)oxy)-1-(pyridin-2-yl)ethan-1-one (3zb):  $^1\text{H}$  NMR (300 MHz,  $\text{CDCl}_3$ ):

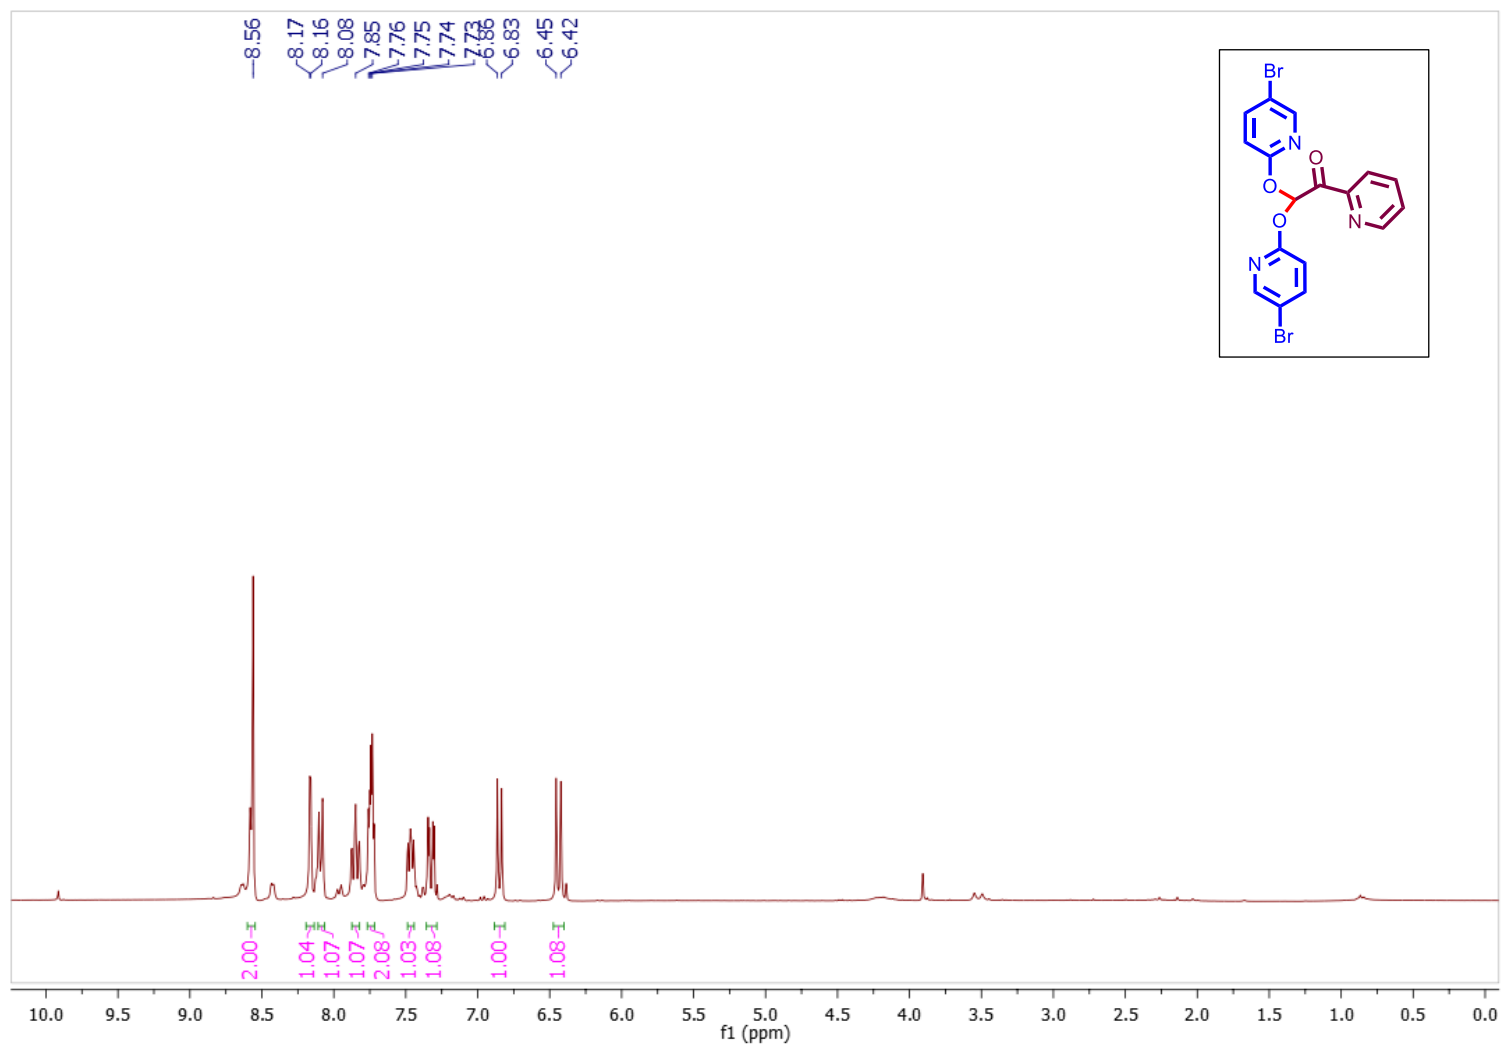

2,2-bis((5-bromopyridin-2-yl)oxy)-1-(pyridin-2-yl)ethan-1-one (3zb):  $^{13}\text{C}$  NMR (75 MHz,  $\text{CDCl}_3$ ):

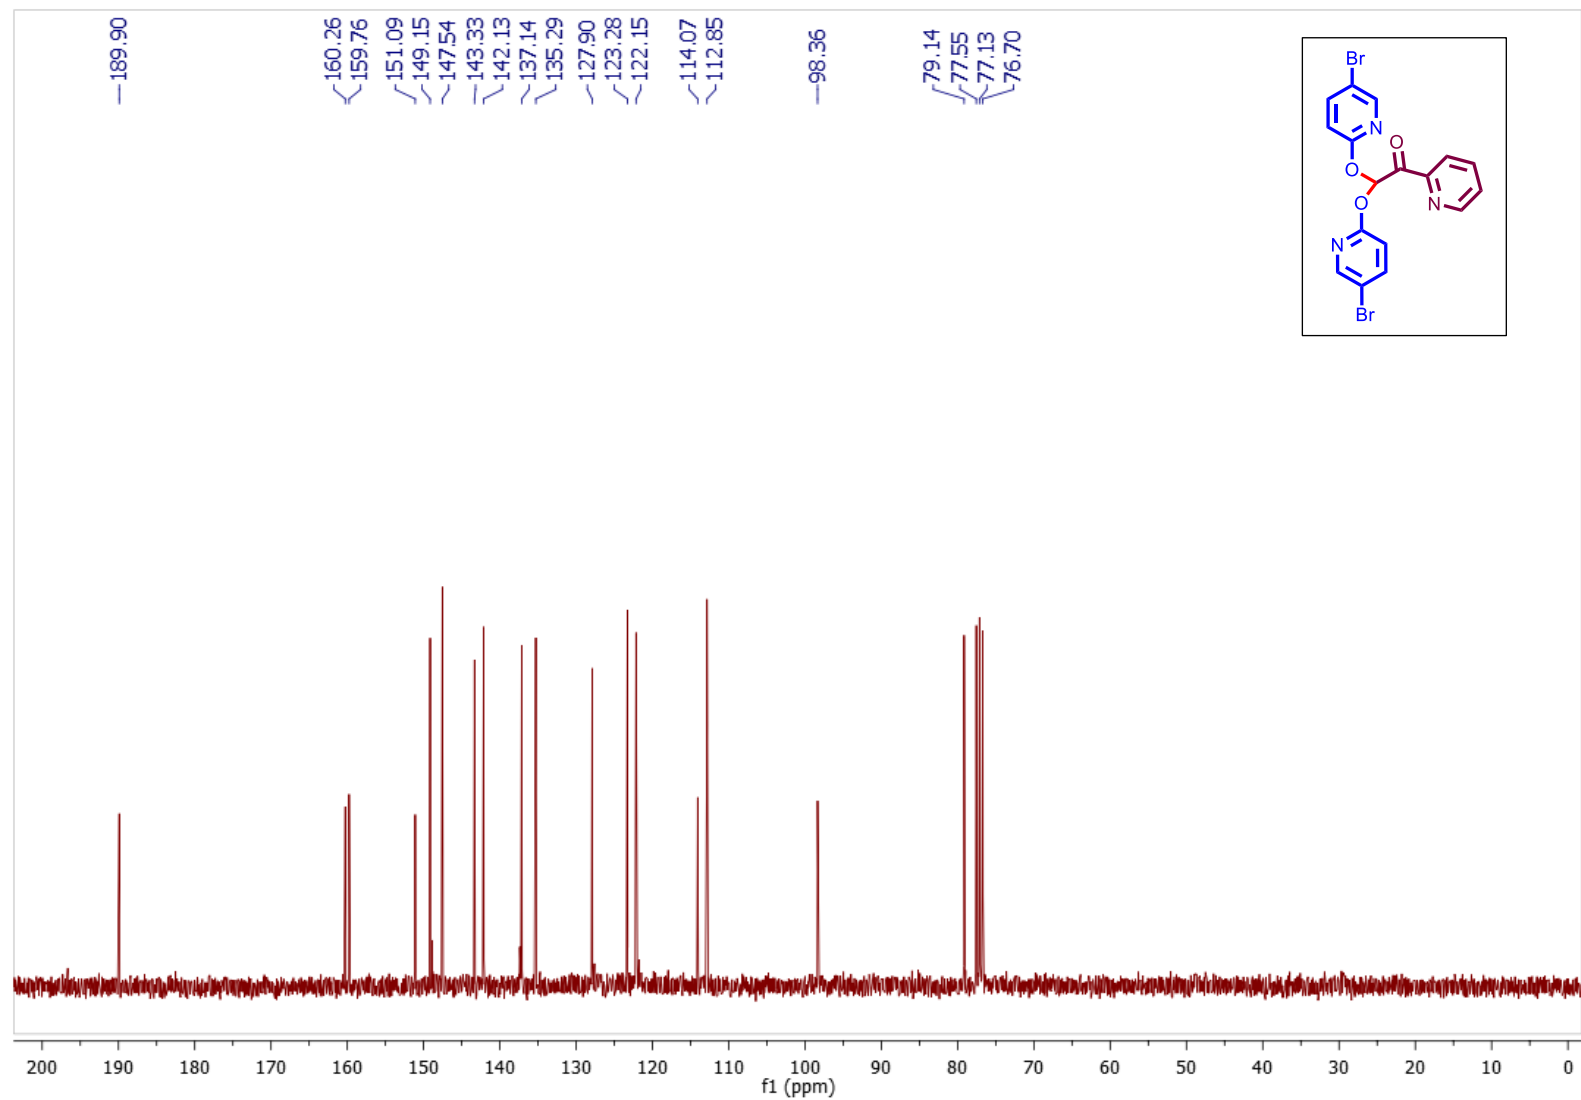

2,2-bis((5-bromopyridin-2-yl)oxy)-1-cyclopropylethan-1-one (3zc):  $^1\text{H}$  NMR (300 MHz,  $\text{CDCl}_3$ ):

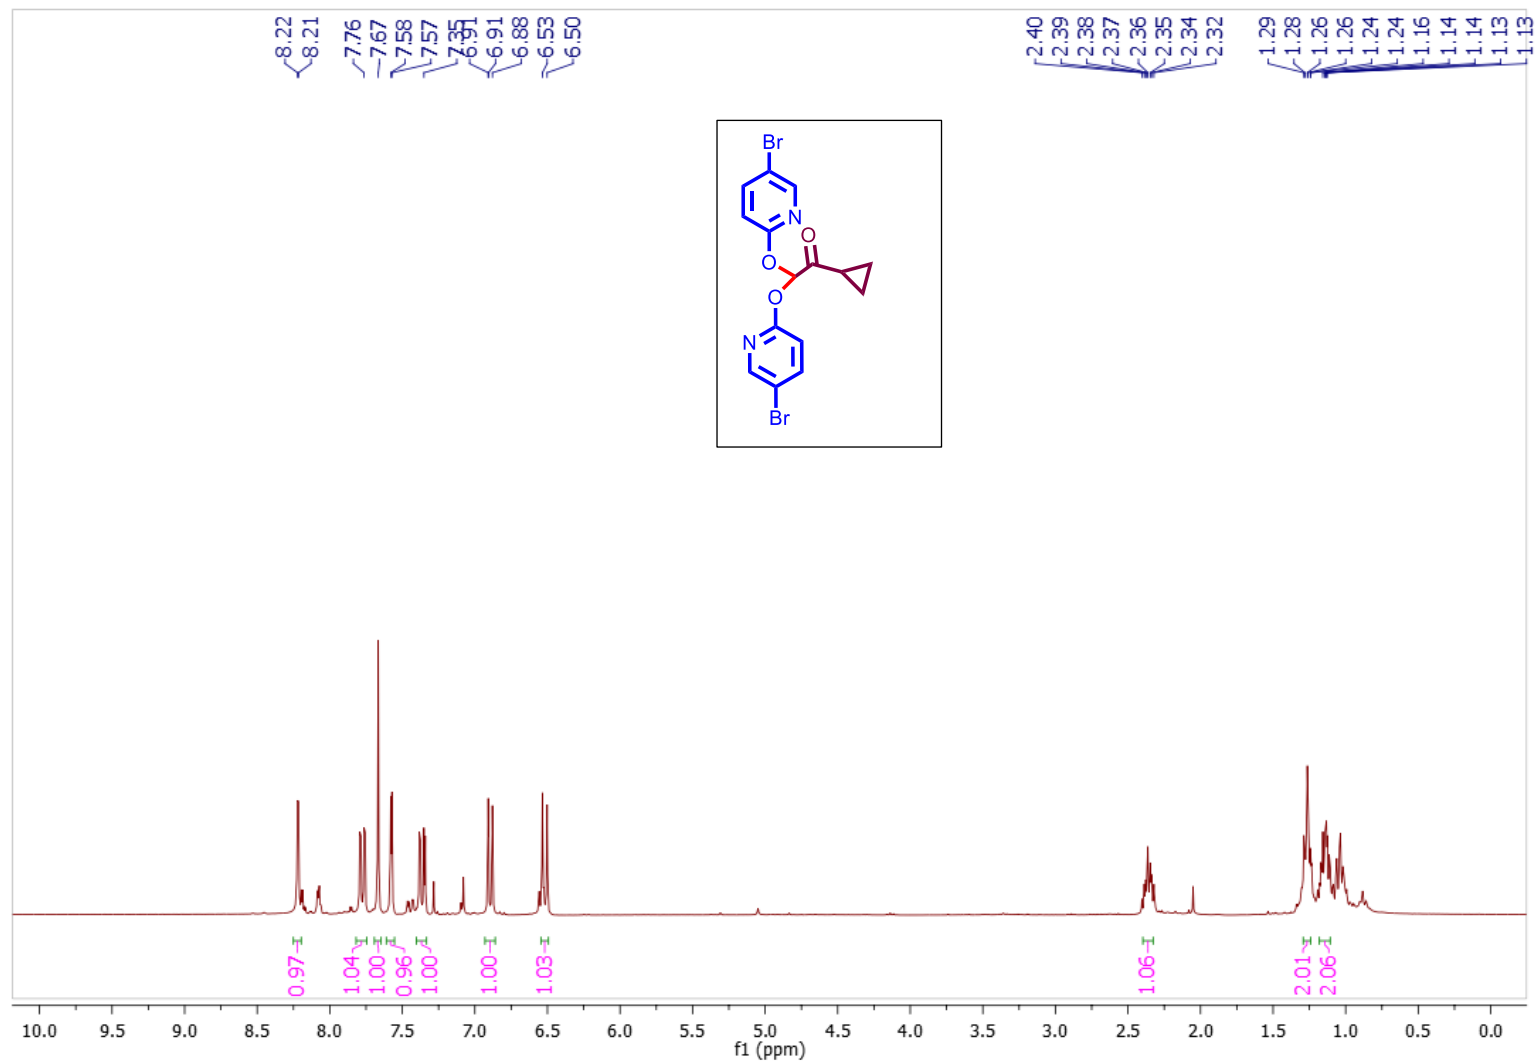

2,2-bis((5-bromopyridin-2-yl)oxy)-1-cyclopropylethan-1-one (3zc):  $^1\text{H}$  NMR (300 MHz,  $\text{CDCl}_3$ ):  $^{13}\text{C}$  NMR (75 MHz,  $\text{CDCl}_3$ ):

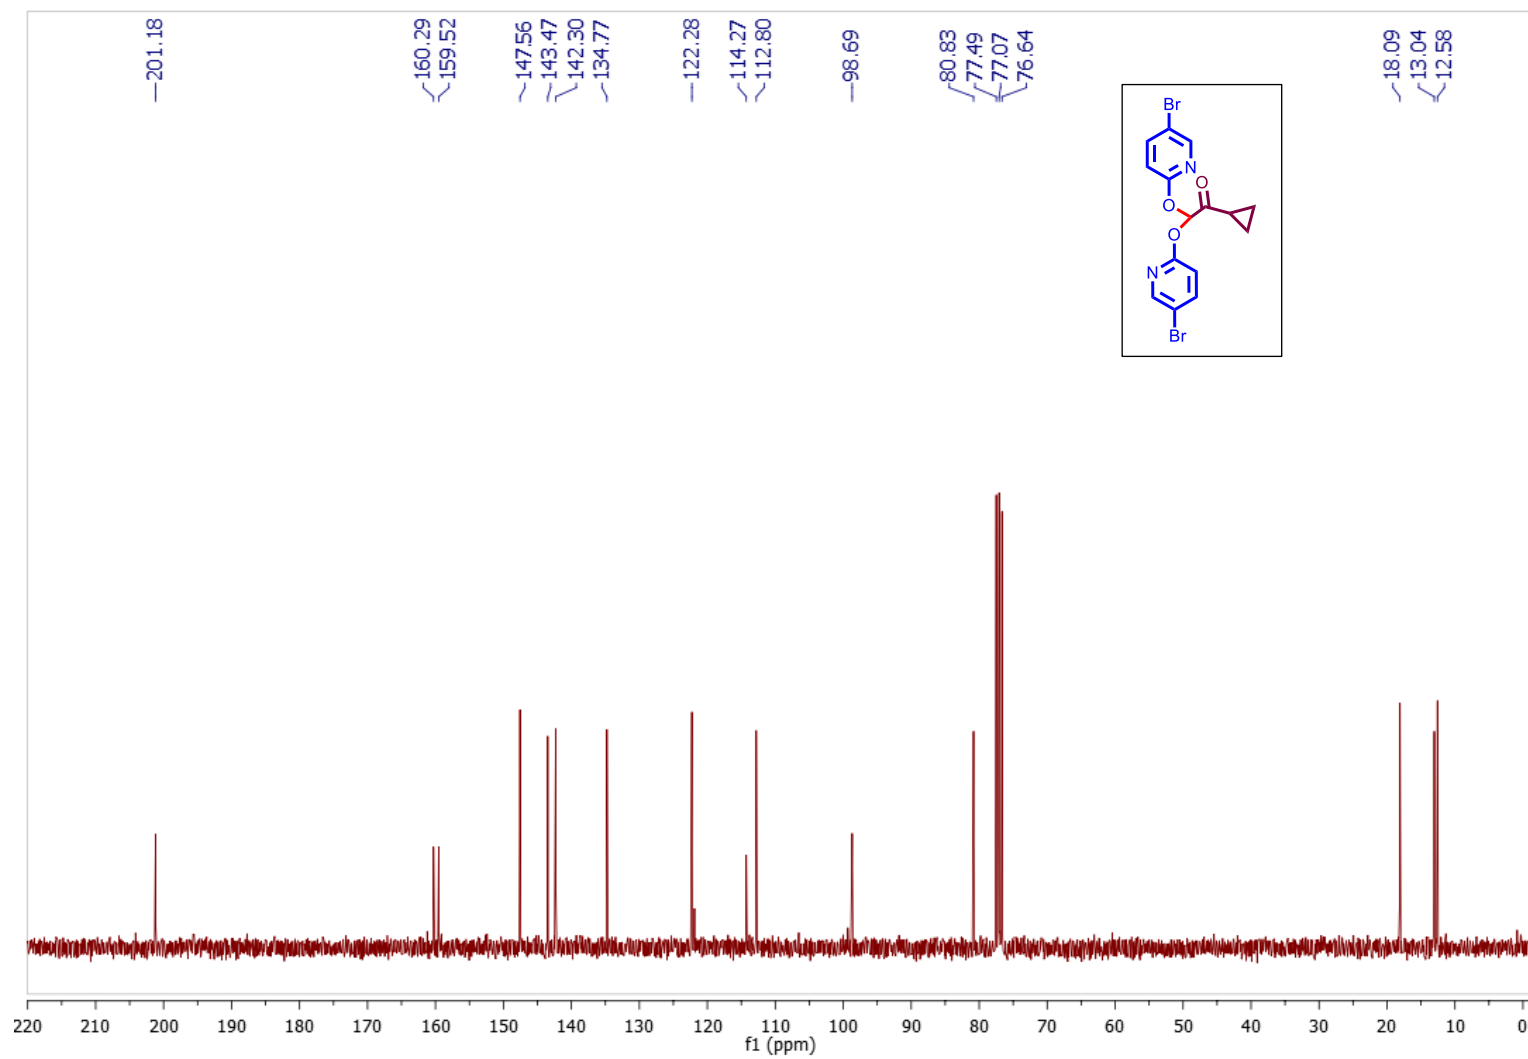

2,2-bis((5-bromopyridin-2-yl)oxy)-1-(p-tolyl)ethan-1-one (3zd): <sup>1</sup>H NMR (300 MHz, CDCl<sub>3</sub>):

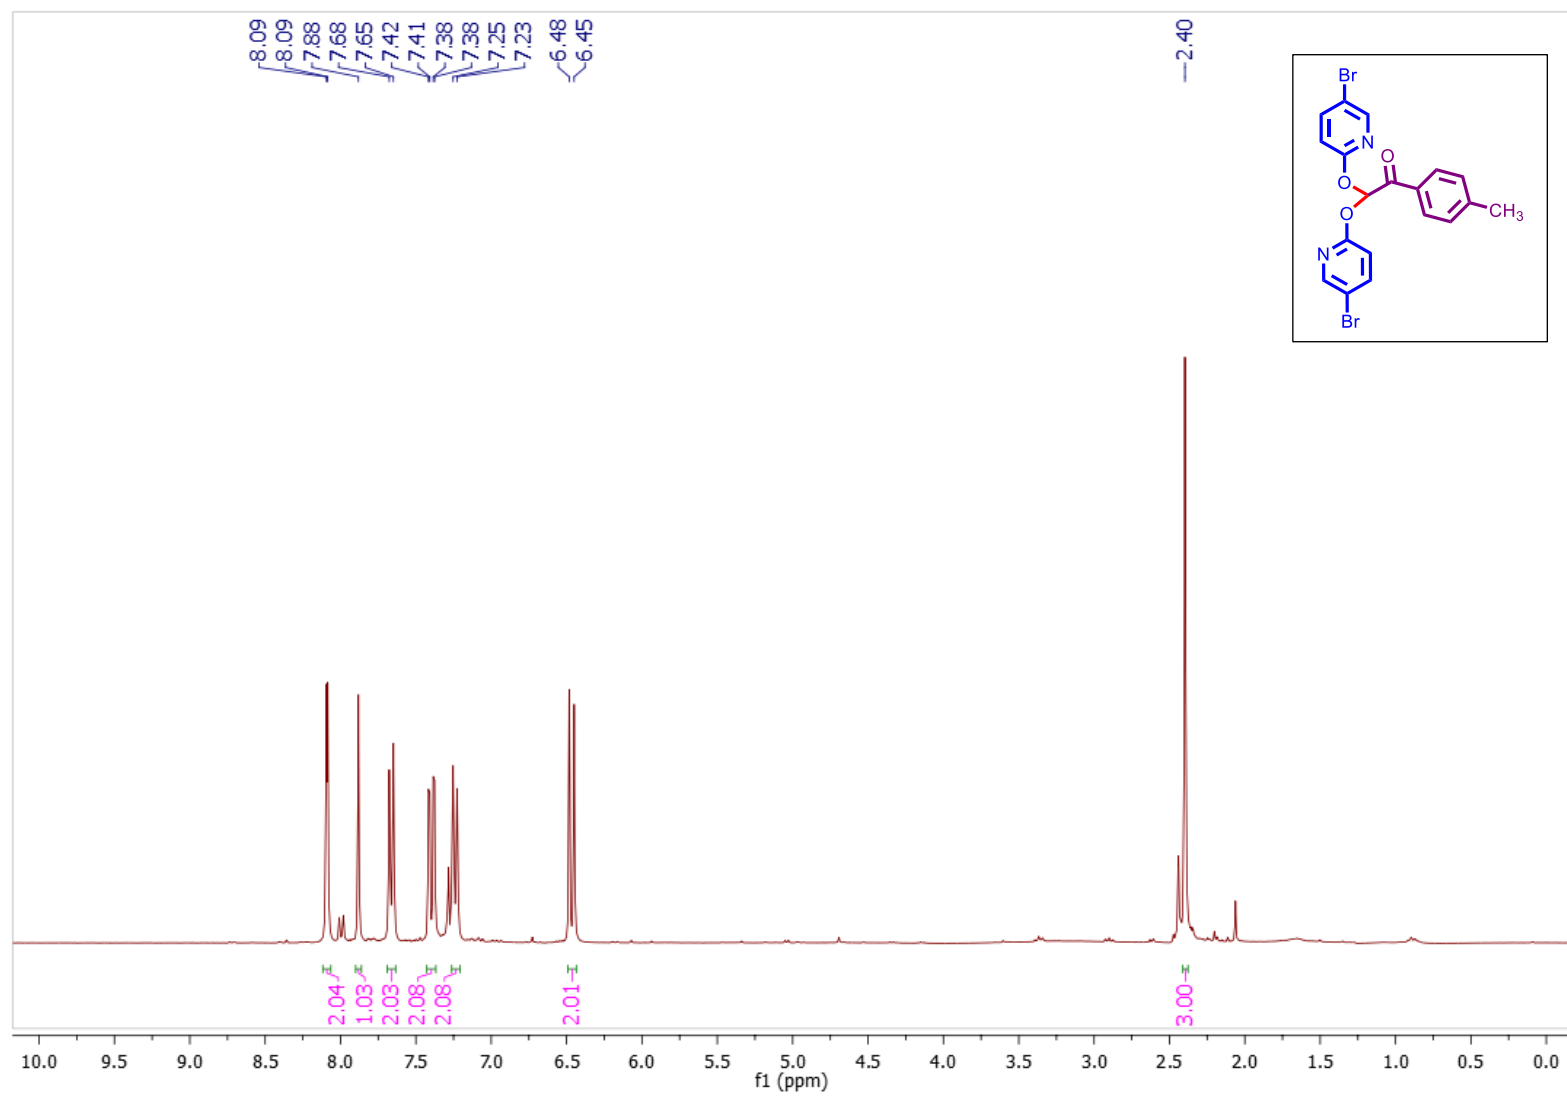

2,2-bis((5-bromopyridin-2-yl)oxy)-1-(p-tolyl)ethan-1-one (3zd):  $^{13}\text{C}$  NMR (75 MHz,  $\text{CDCl}_3$ ):

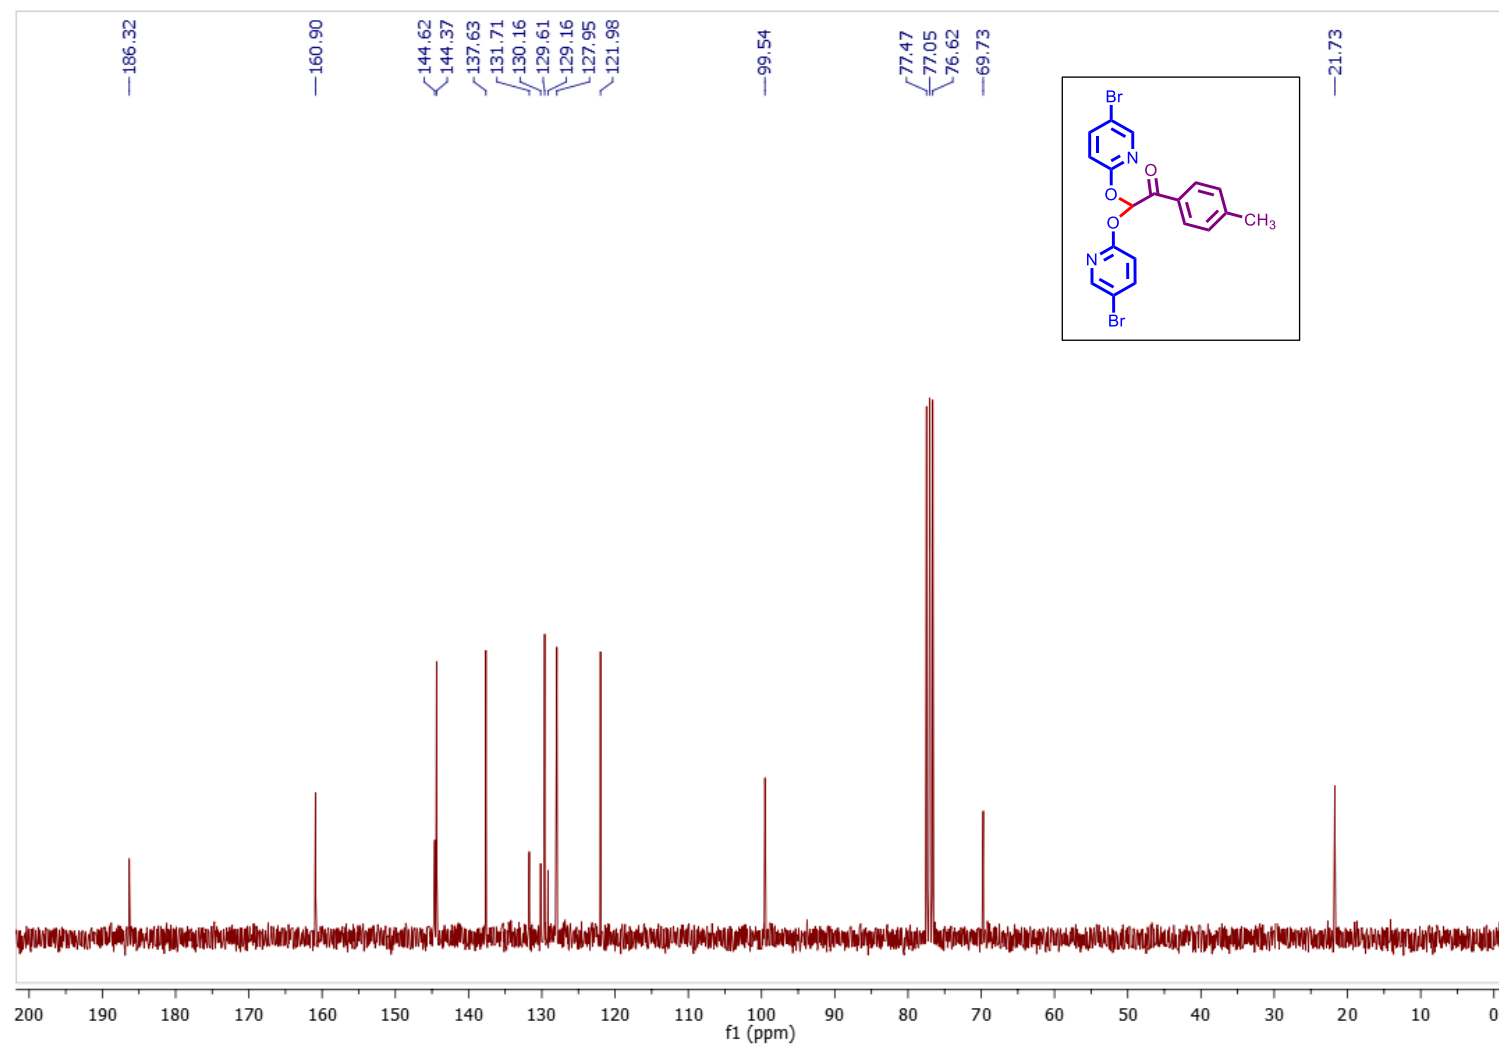

2,2-bis((5-bromopyridin-2-yl)oxy)-1-(4-methoxyphenyl)ethan-1-one (3ze):  $^1\text{H}$  NMR (300 MHz,  $\text{CDCl}_3$ ):

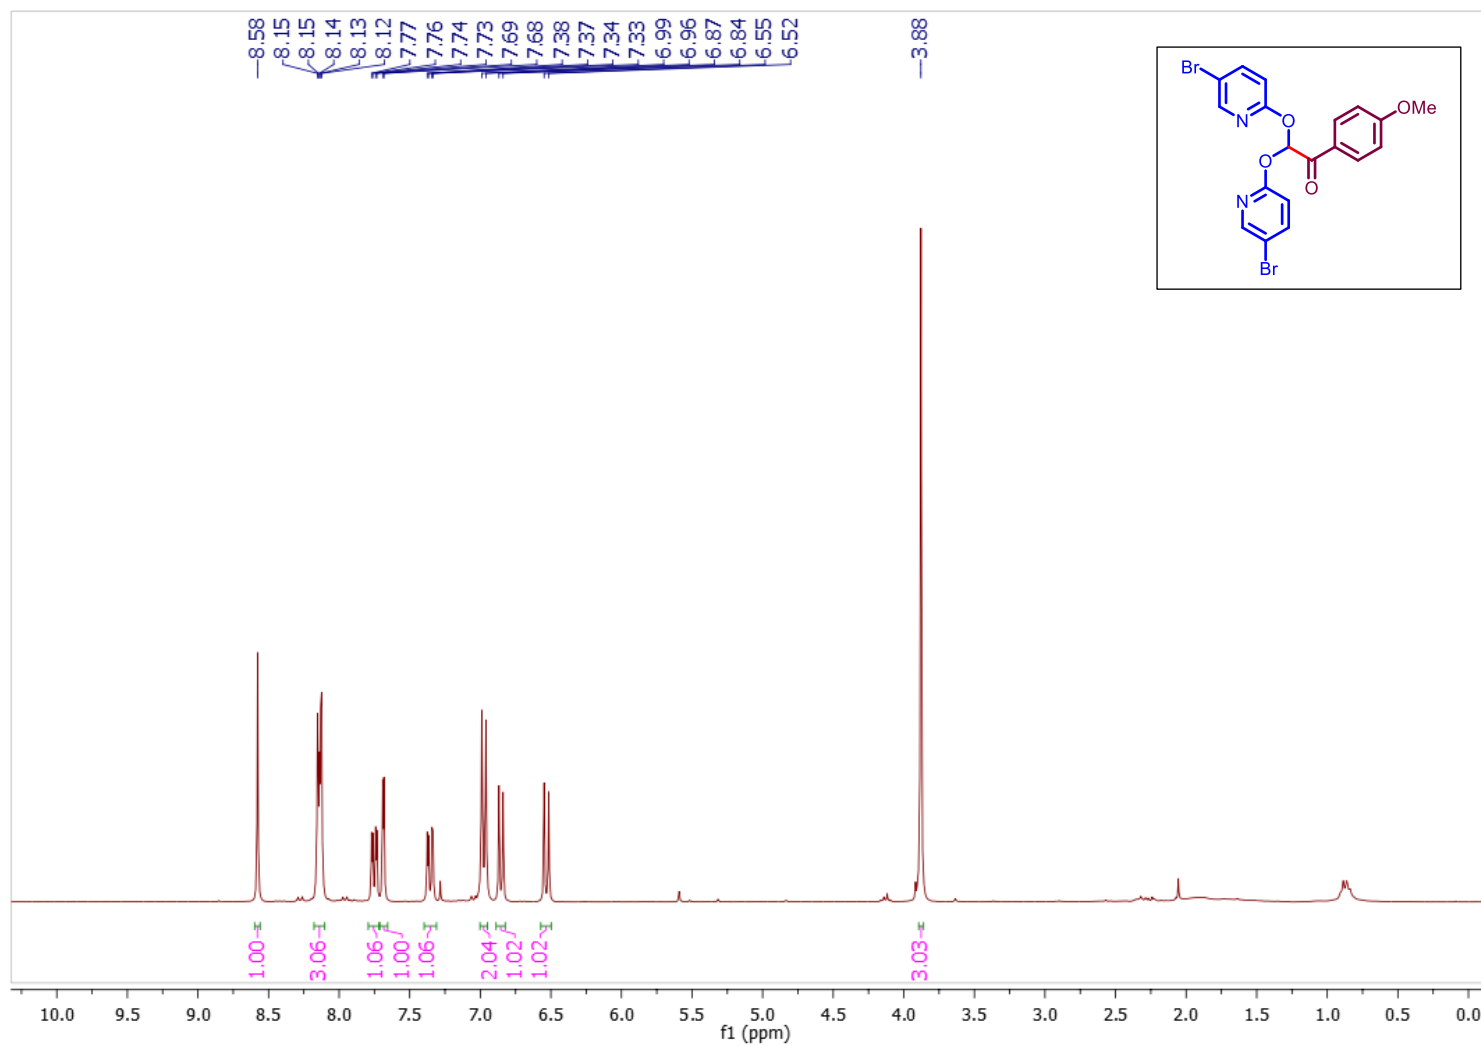

**2,2-bis((5-bromopyridin-2-yl)oxy)-1-(4-methoxyphenyl)ethan-1-one (3ze):  $^{13}\text{C}$  NMR (75 MHz,  $\text{CDCl}_3$ ):**

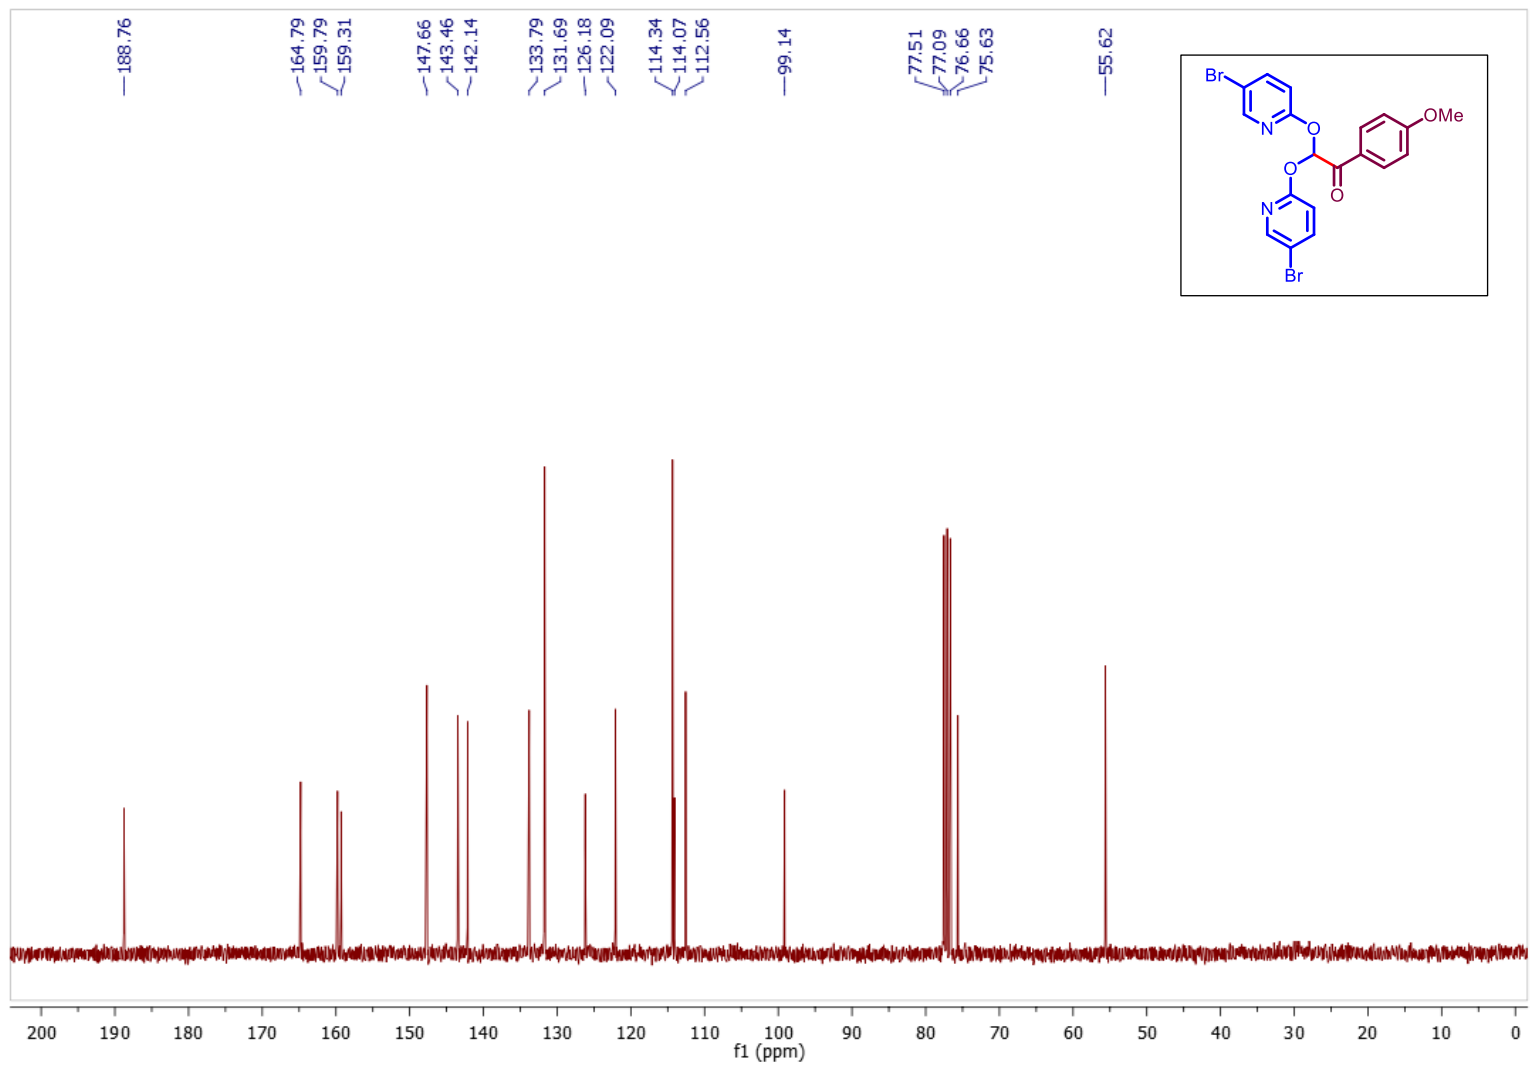



2,2-bis((5-bromopyridin-2-yl)oxy)-1-(2,4-dichlorophenyl)ethan-1-one (3zf):  $^1\text{H}$  NMR (300 MHz,  $\text{CDCl}_3$ ):

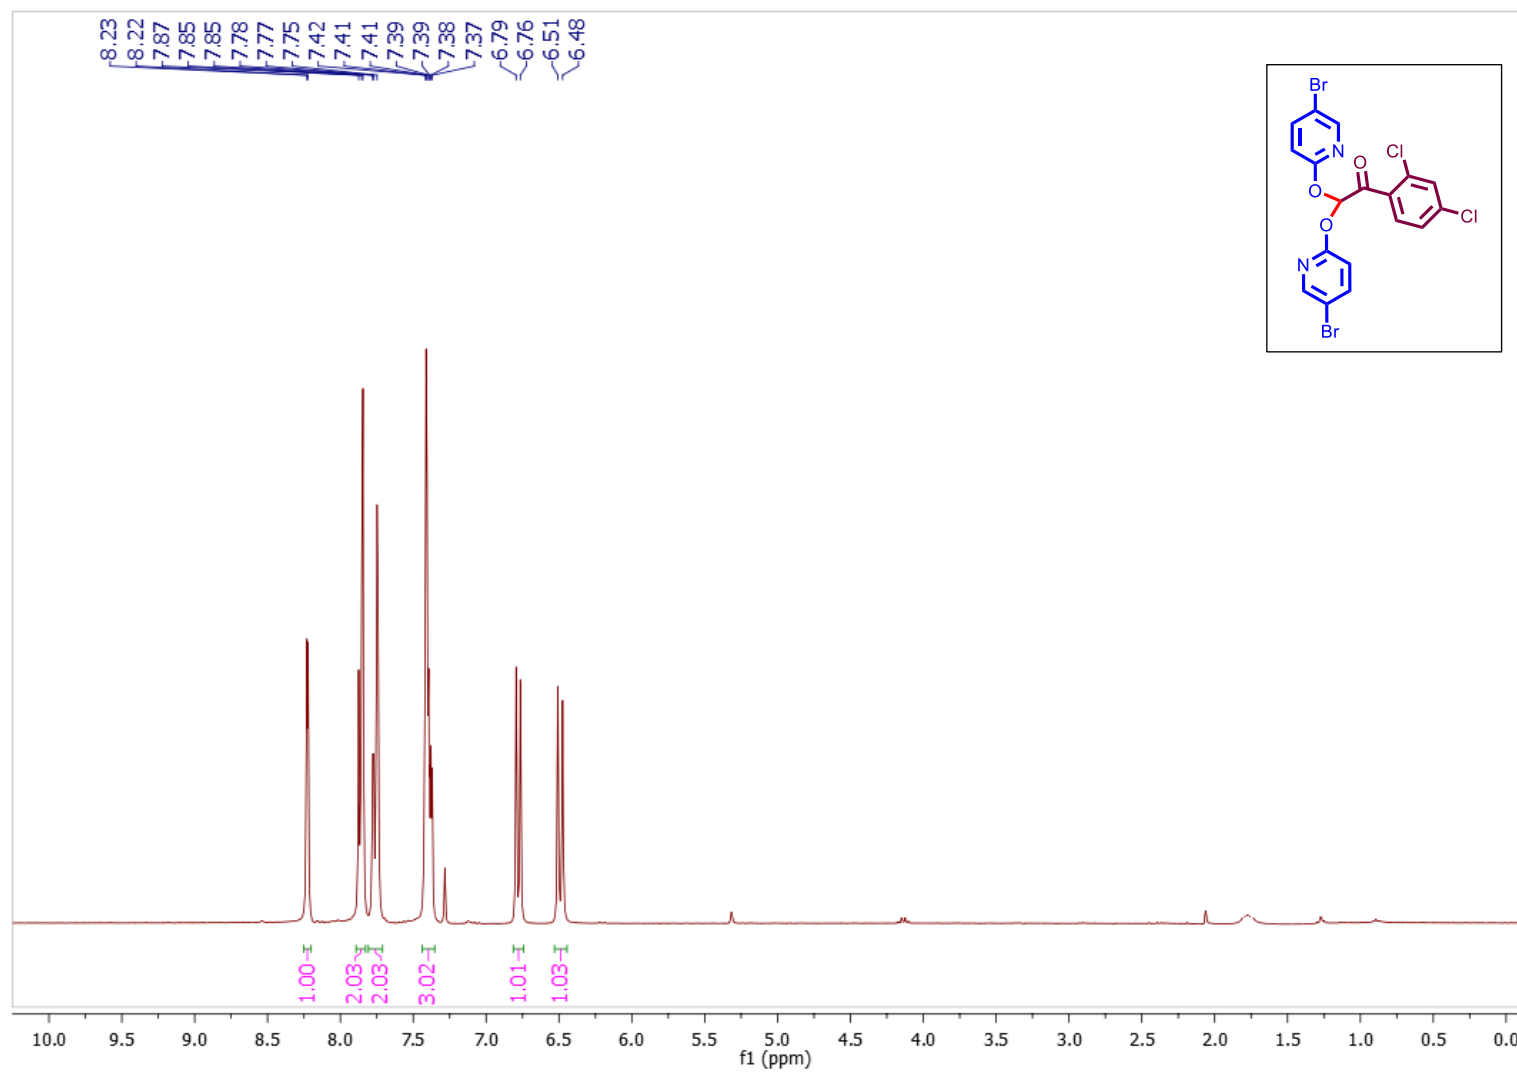

2,2-bis((5-bromopyridin-2-yl)oxy)-1-(2,4-dichlorophenyl)ethan-1-one (3zf):  $^1\text{H}$  NMR (300 MHz,  $\text{CDCl}_3$ ):  $^{13}\text{C}$  NMR (75 MHz,  $\text{CDCl}_3$ ):

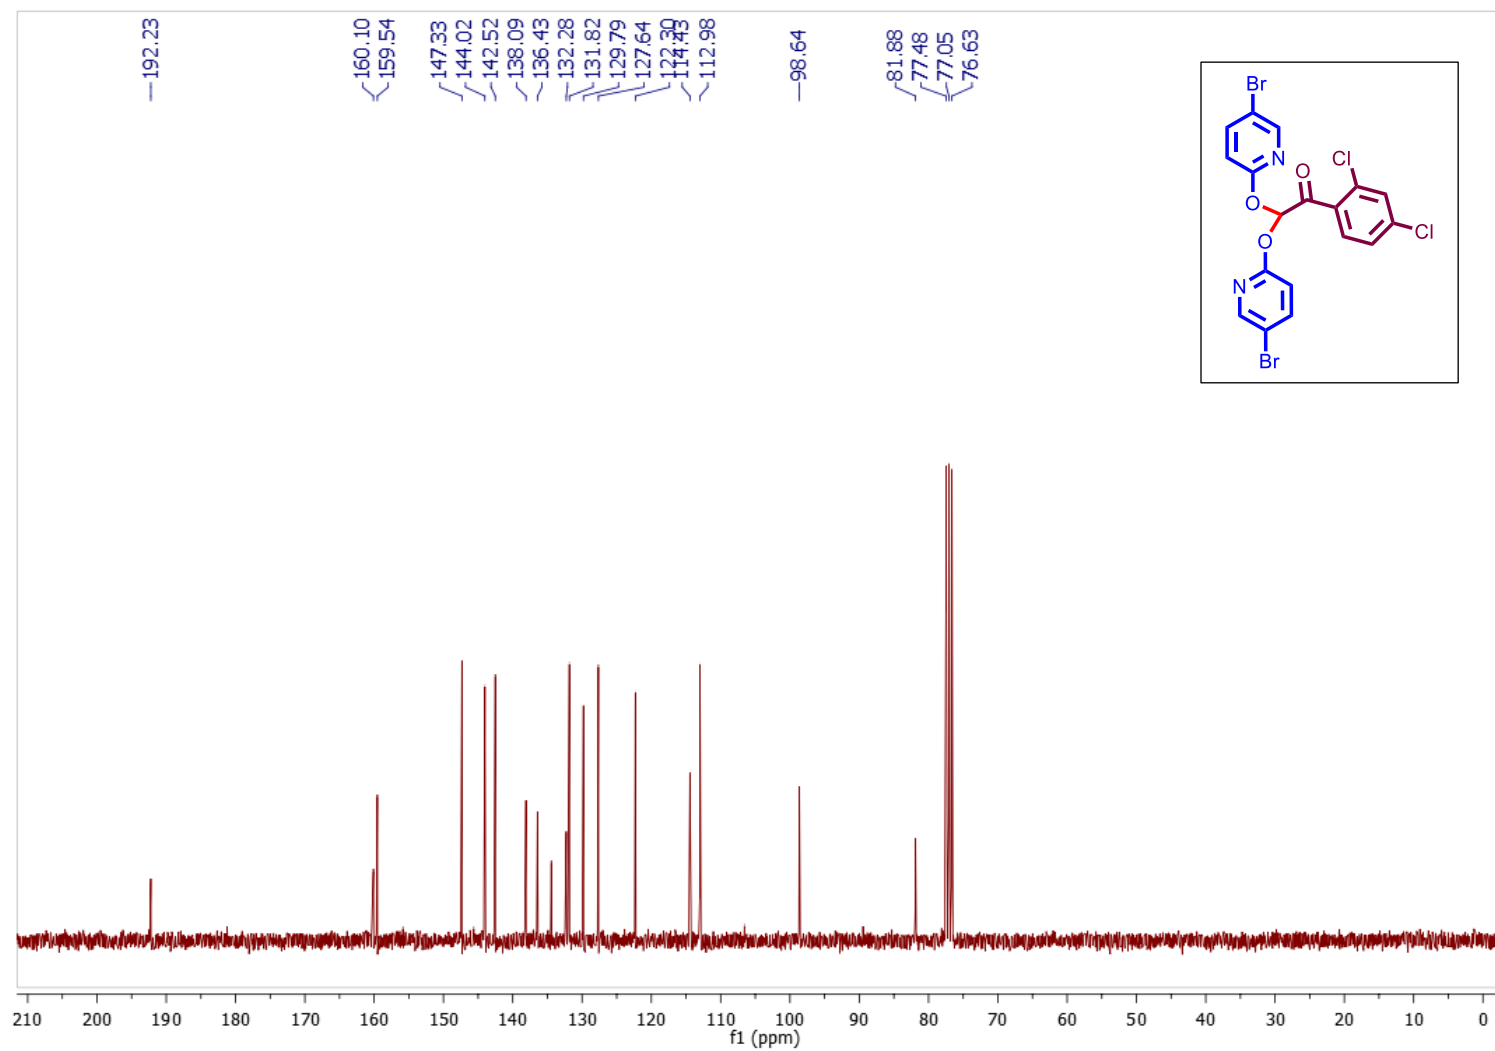

4-(2-oxo-1-((4-oxo-3-(p-tolyl)-3,4-dihydrophthalazin-1-yl)oxy)-2-(p-tolyl)ethoxy)-2-phenylphthalazin-1(2H)-one (3zg): <sup>1</sup>H NMR (300 MHz, CDCl<sub>3</sub>):

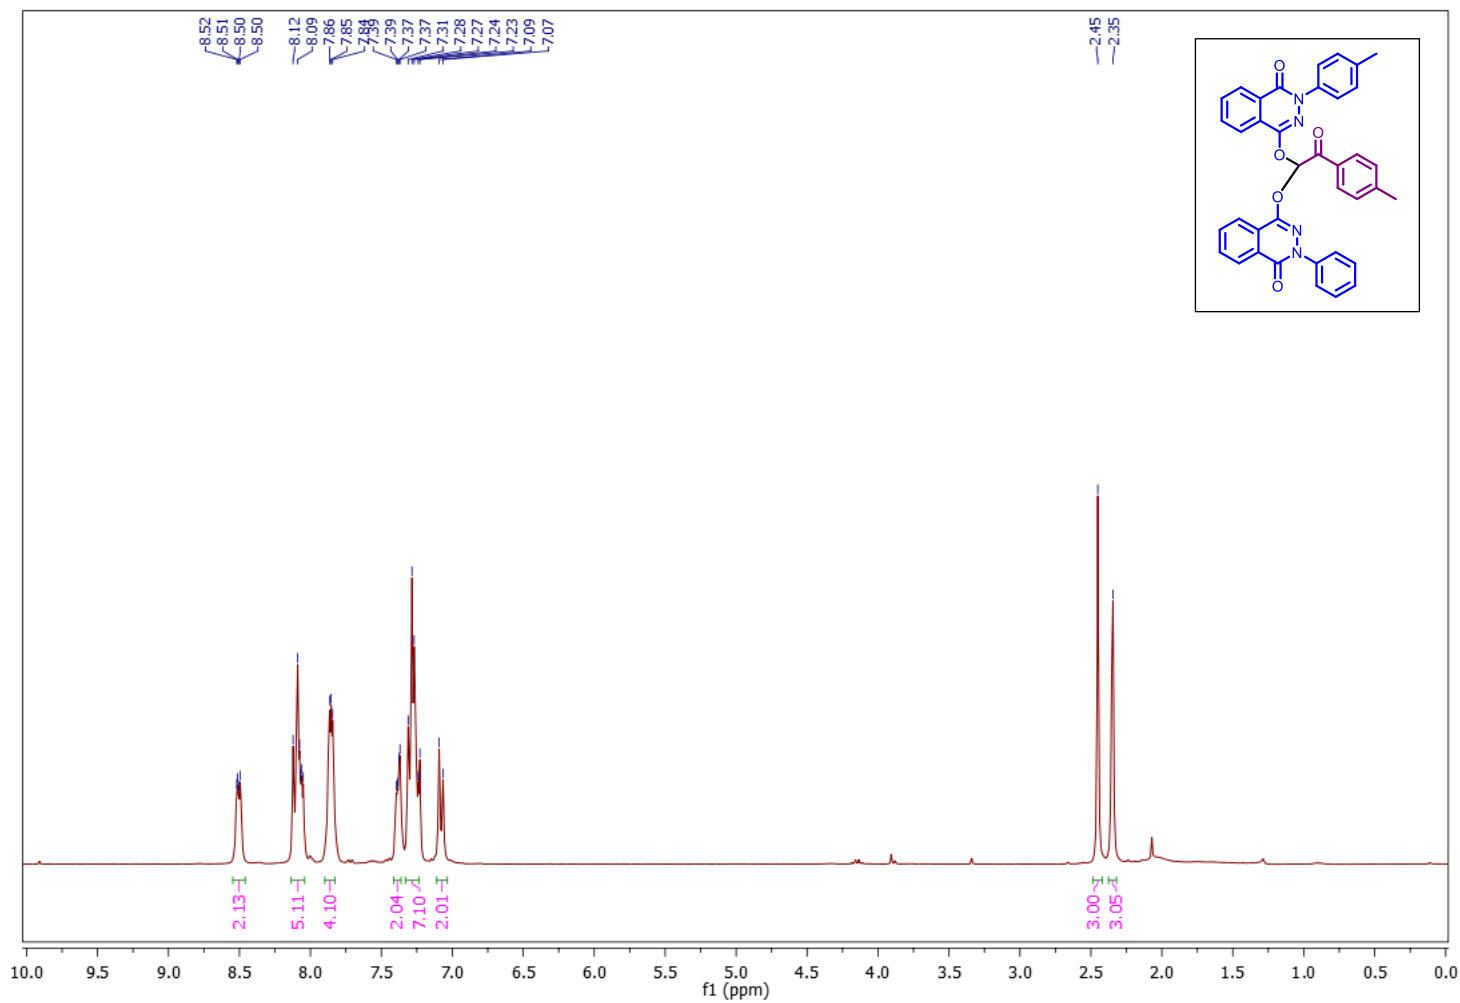

4-(2-oxo-1-((4-oxo-3-(p-tolyl)-3,4-dihydrophthalazin-1-yl)oxy)-2-(p-tolyl)ethoxy)-2-phenylphthalazin-1(2H)-one (**3y**):  $^{13}\text{C}$  NMR (75 MHz,  $\text{CDCl}_3$ ):

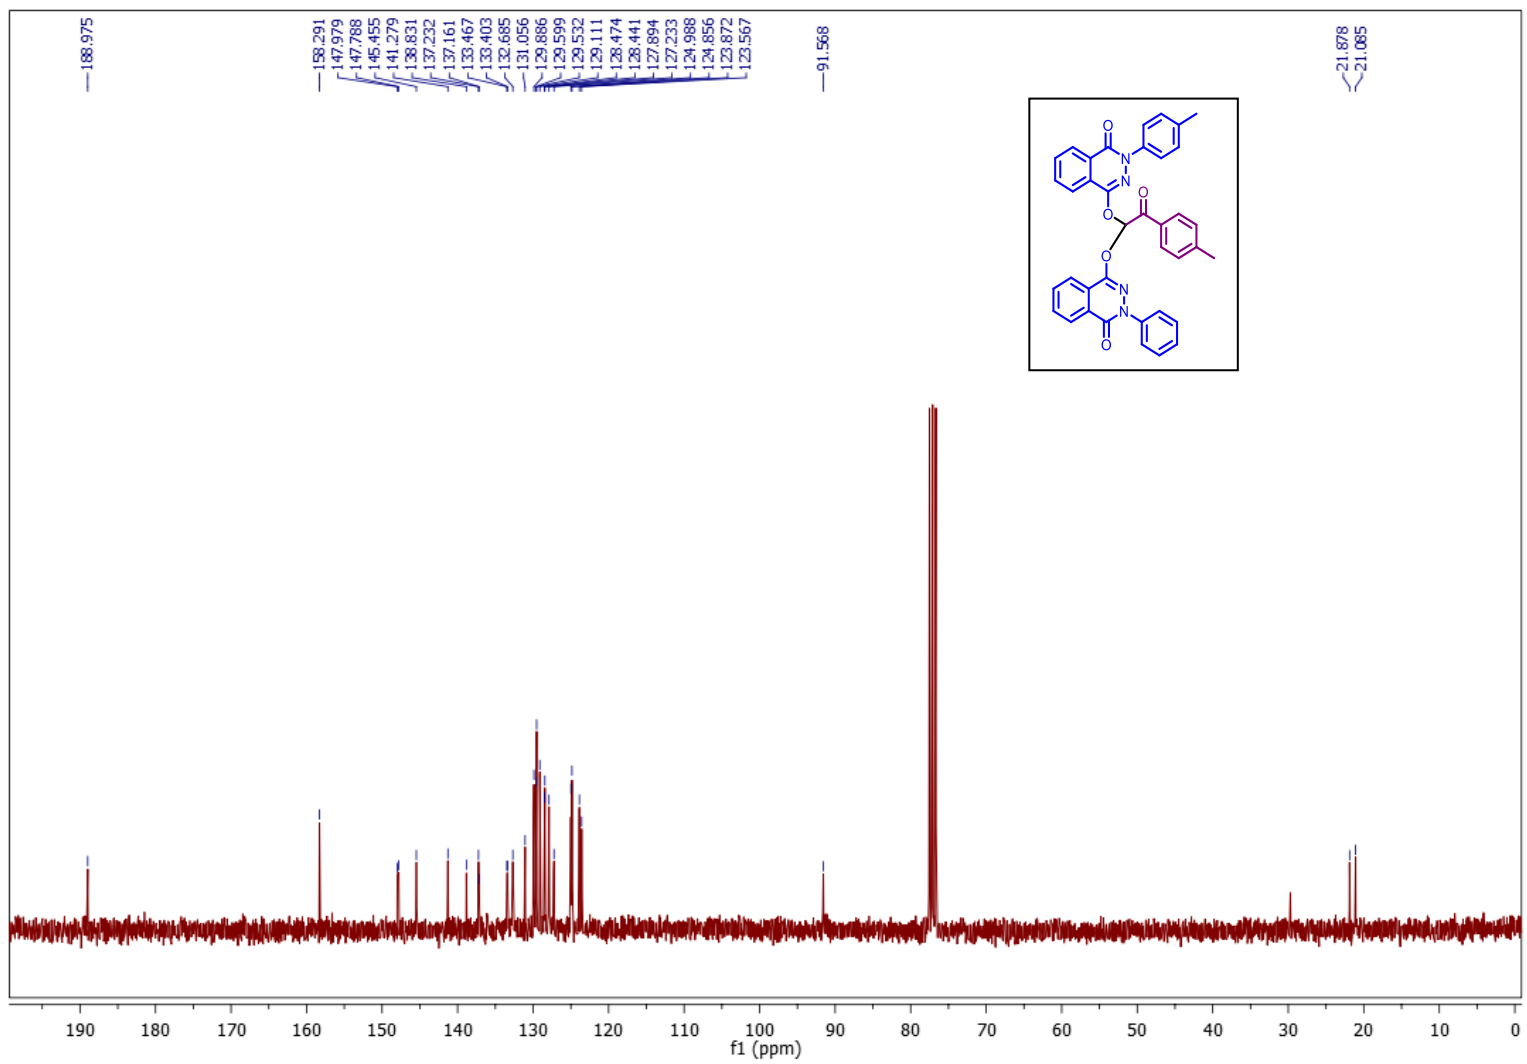

4-((2-oxocyclohexyl)oxy)-2-phenylphthalazin-1(2H)-one: (3ab): <sup>1</sup>H NMR (300 MHz, CDCl<sub>3</sub>):

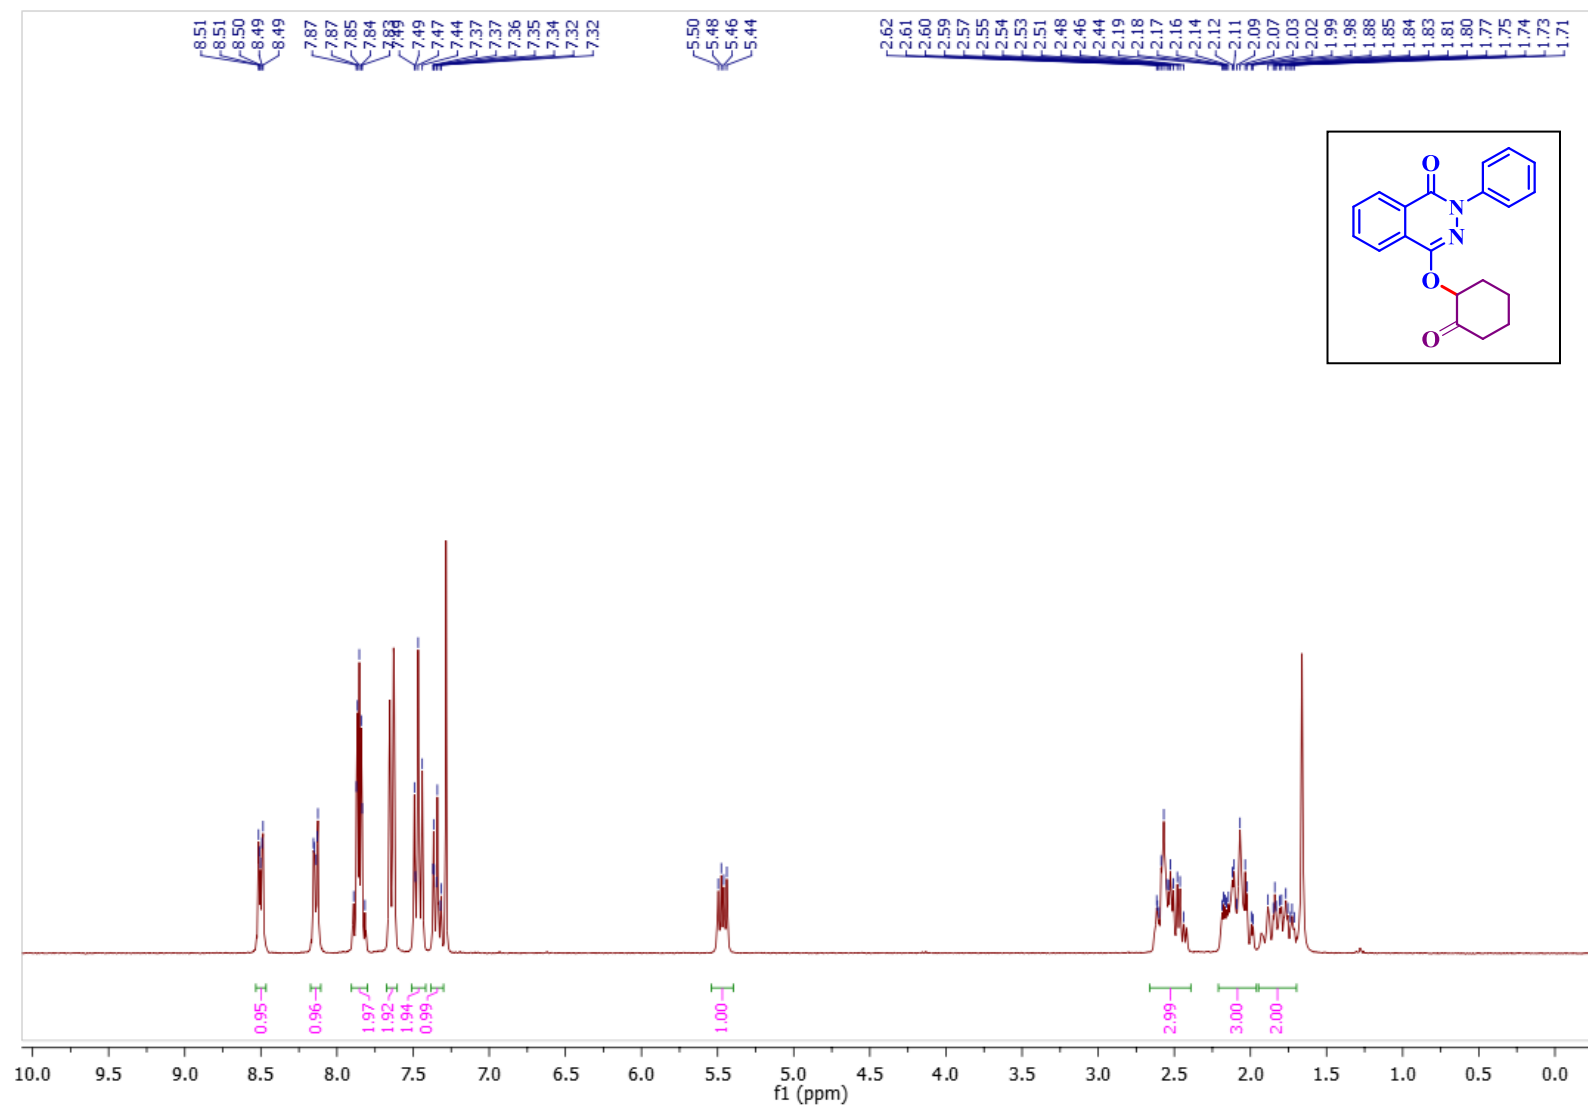

4-((2-oxocyclohexyl)oxy)-2-phenylphthalazin-1(2H)-one: (3ab): <sup>13</sup>C NMR (75 MHz, CDCl<sub>3</sub>):

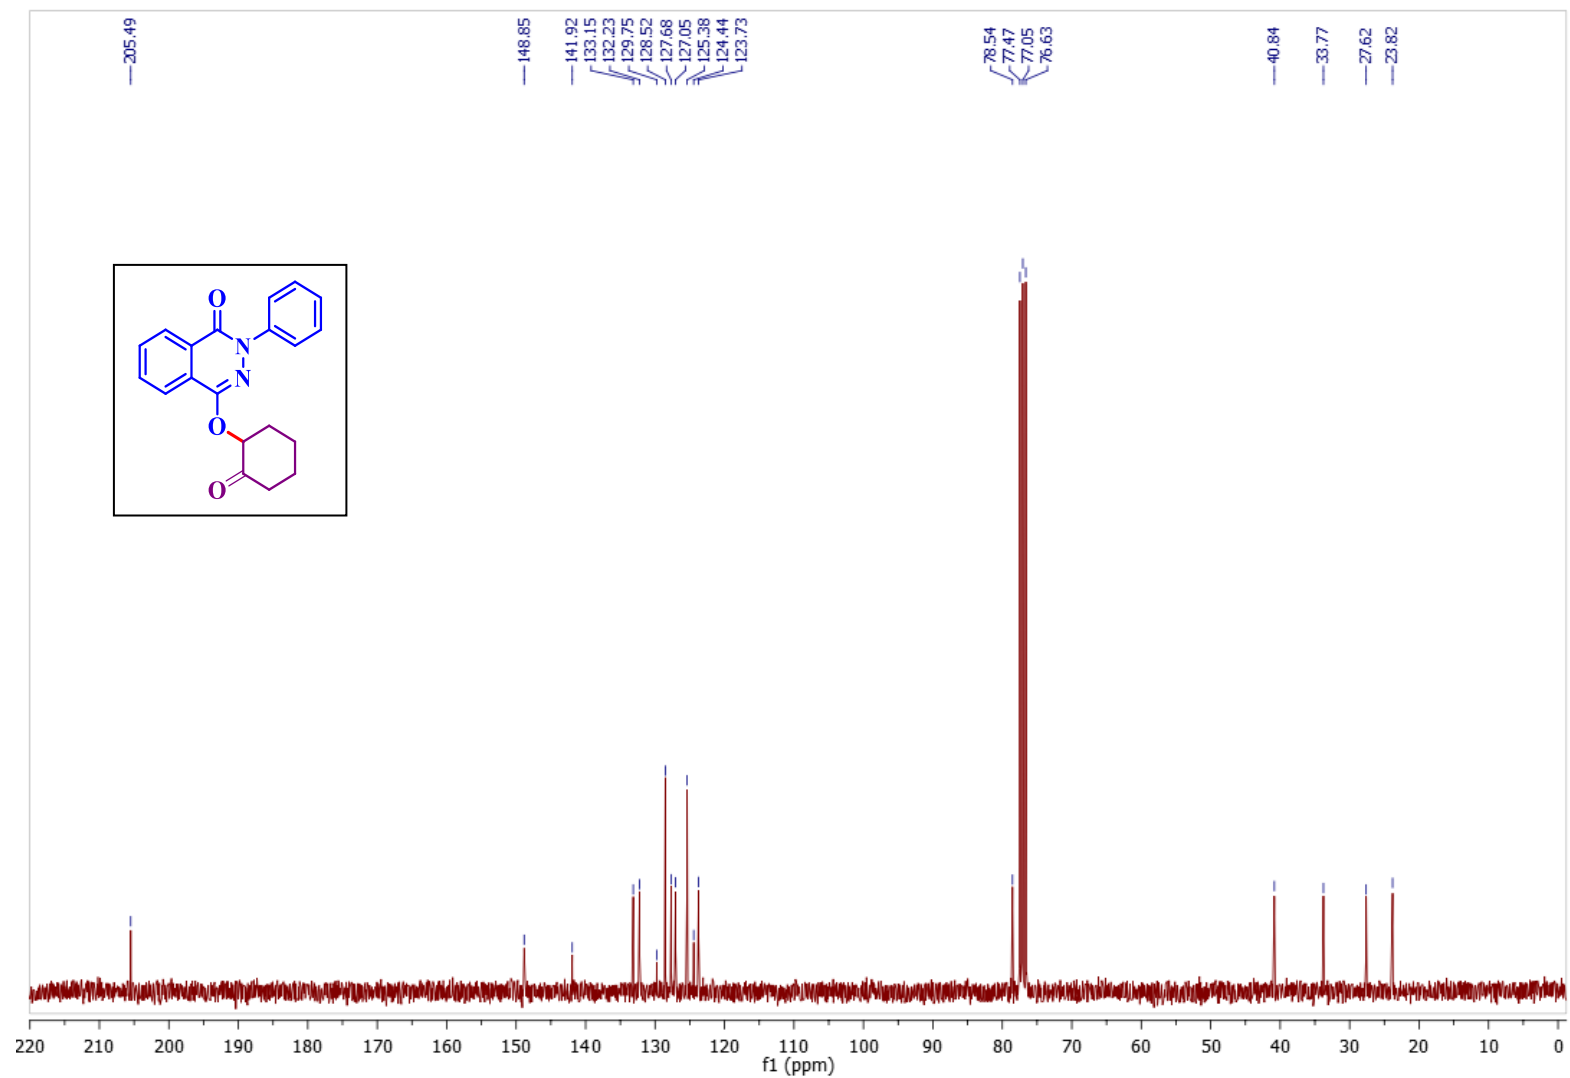

4-((6-methoxy-1-oxo-1,2,3,4-tetrahydronaphthalen-2-yl)oxy)-2-phenylphthalazin-1(2H)-one (3ac):  $^1\text{H}$  NMR (300 MHz,  $\text{CDCl}_3$ ):

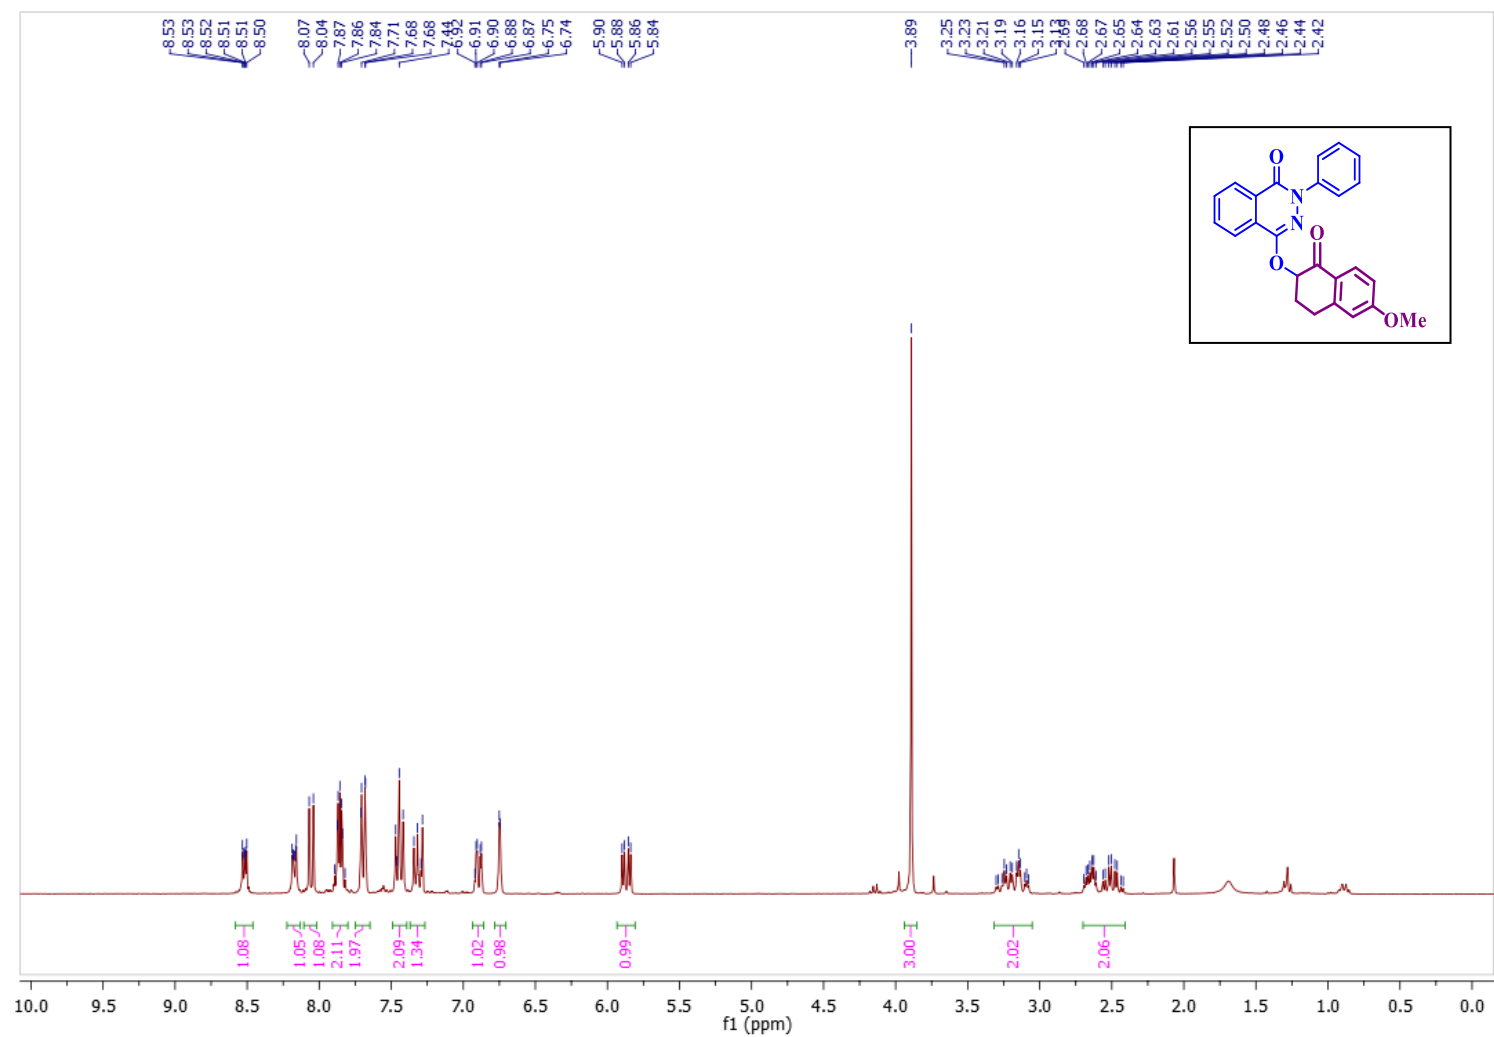

4-((6-methoxy-1-oxo-1,2,3,4-tetrahydronaphthalen-2-yl)oxy)-2-phenylphthalazin-1(2H)-one (3ac): <sup>13</sup>C NMR (75 MHz, CDCl<sub>3</sub>):

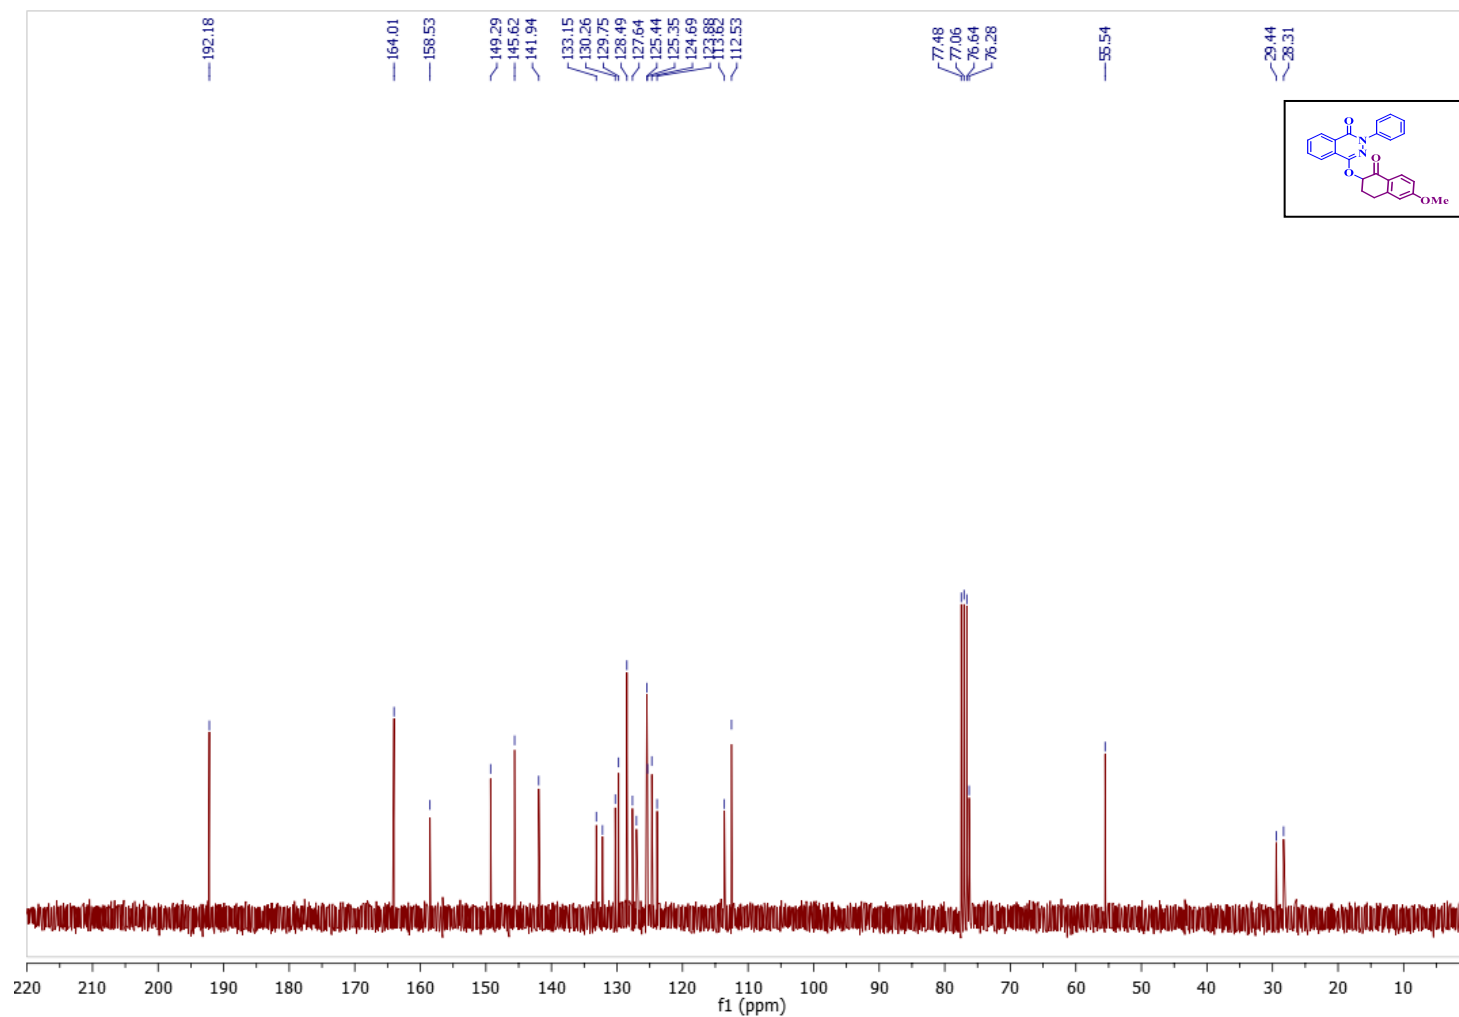



ethyl 3-oxo-2-((4-oxo-3-phenyl-3,4-dihydrophthalazin-1-yl)oxy)butanoate (3ad): <sup>1</sup>H NMR (300 MHz, CDCl<sub>3</sub>):

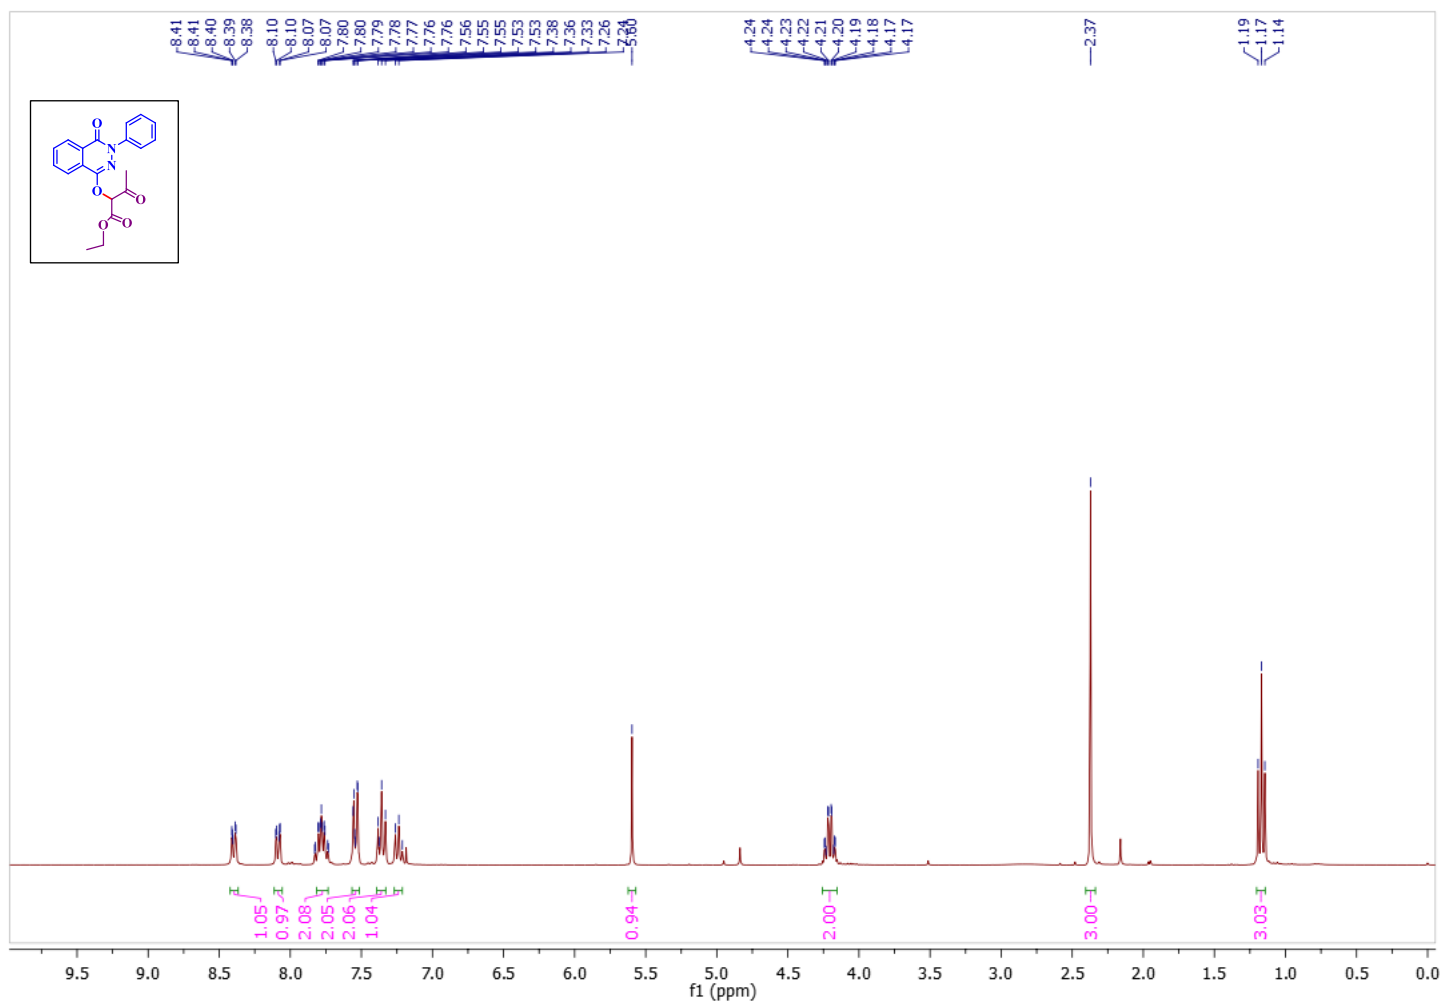

ethyl 3-oxo-2-((4-oxo-3-phenyl-3,4-dihydrophthalazin-1-yl)oxy)butanoate (3ad):  $^{13}\text{C}$  NMR (75 MHz,  $\text{CDCl}_3$ ):

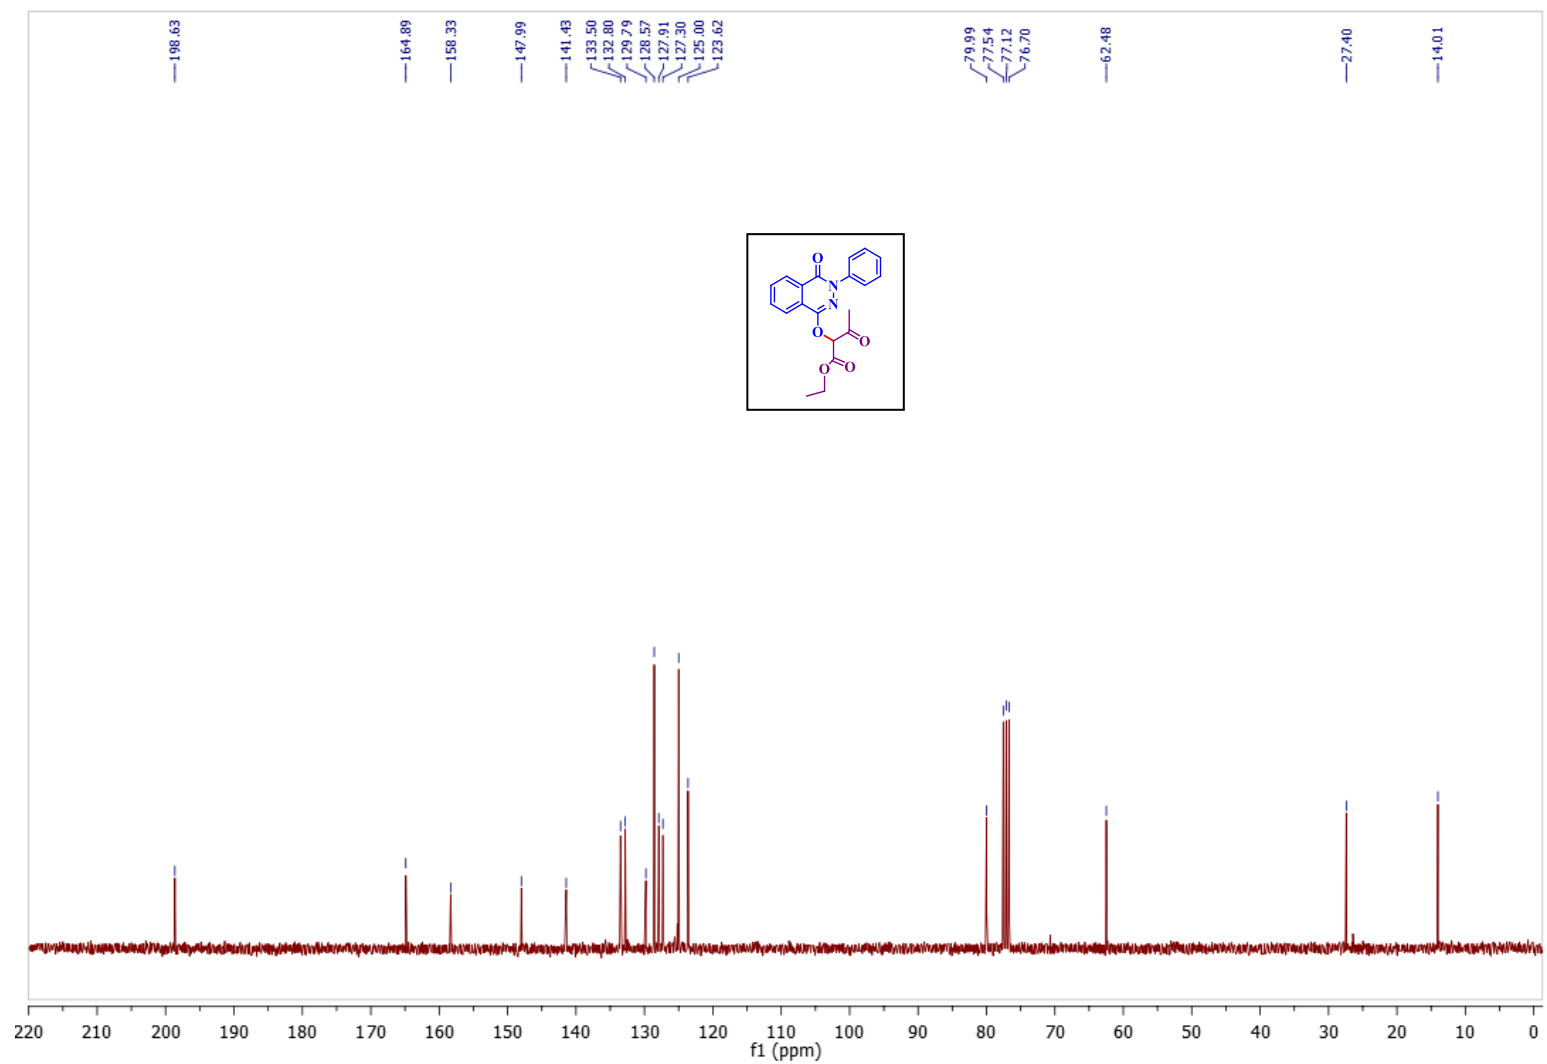

3-((4-oxo-3-phenyl-3,4-dihydrophthalazin-1-yl)oxy)pentane-2,4-dione (3ae):  $^1\text{H}$  NMR (300 MHz,  $\text{CDCl}_3$ ):

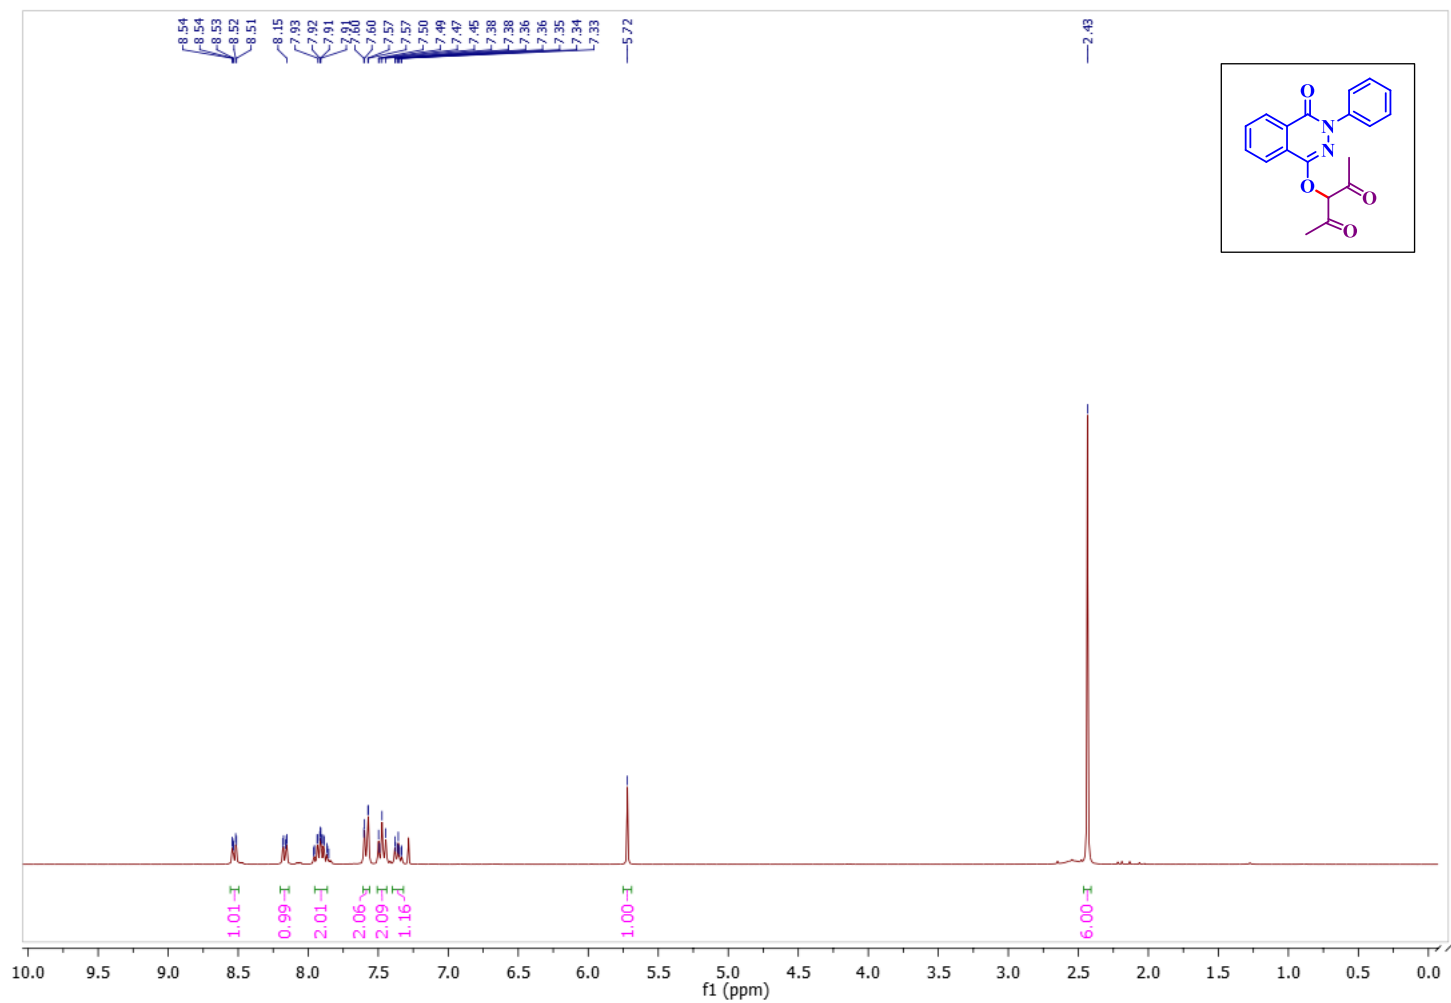

3-((4-oxo-3-phenyl-3,4-dihydrophthalazin-1-yl)oxy)pentane-2,4-dione (3ae): <sup>1</sup>H NMR (300 MHz, CDCl<sub>3</sub>):

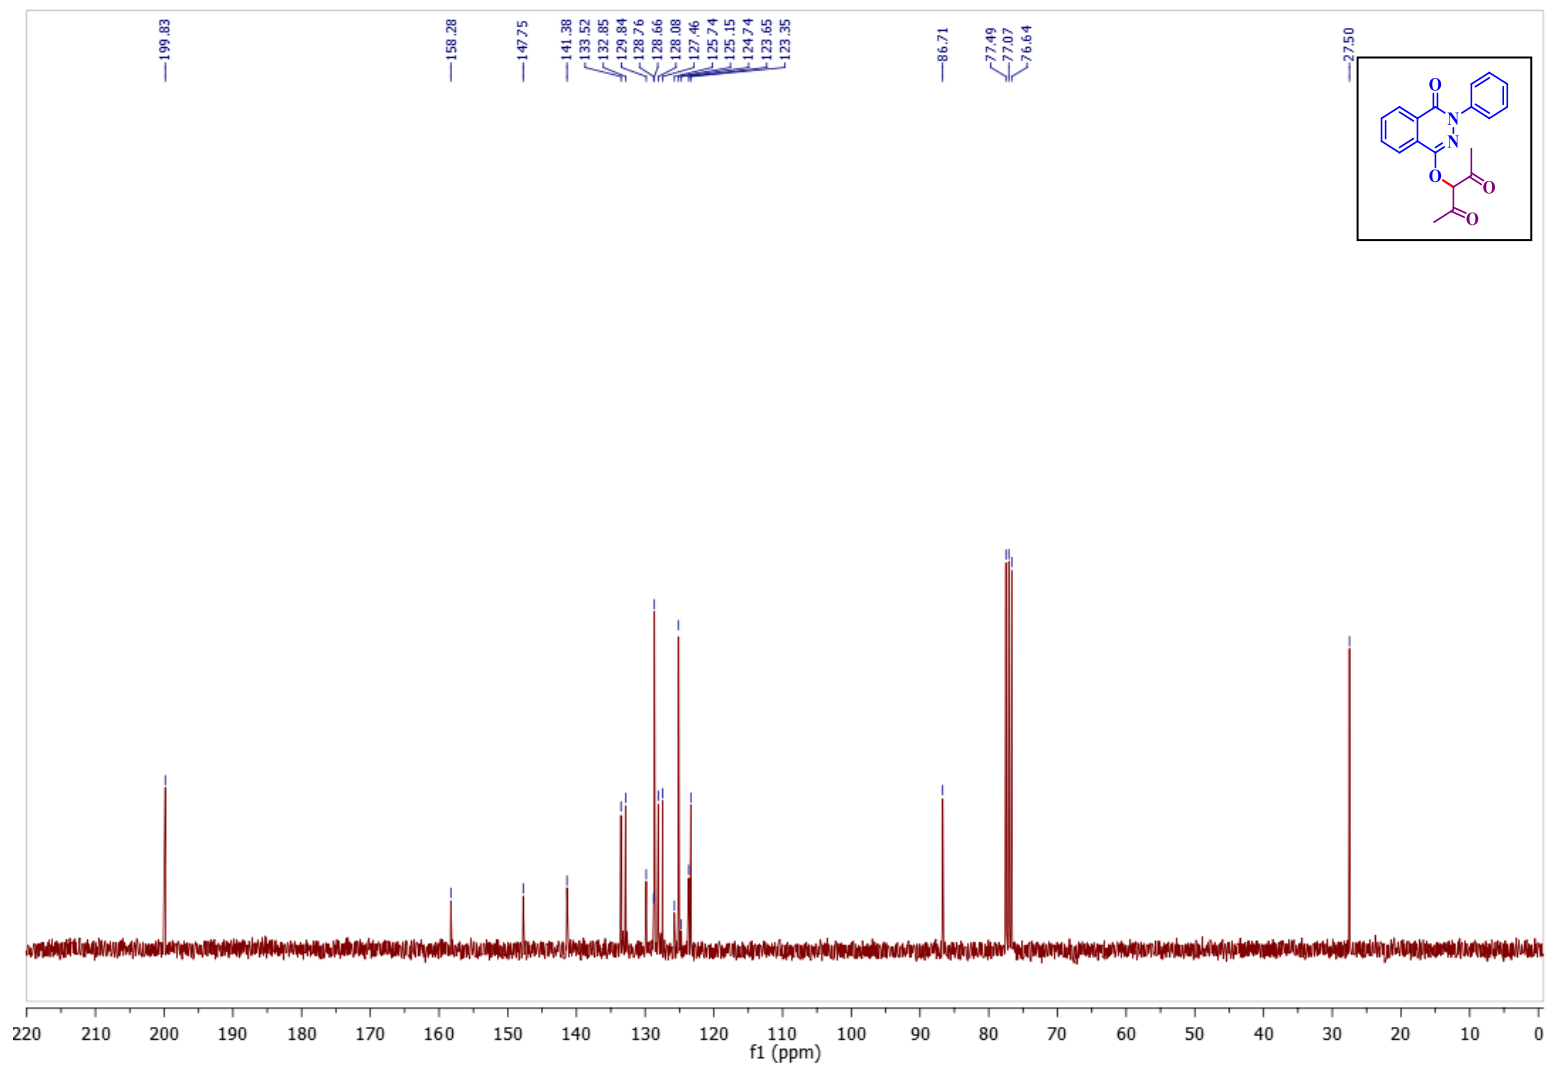

ethyl 3-oxo-2-((4-oxo-3-phenyl-3,4-dihydrophthalazin-1-yl)oxy)-3-phenylpropanoate (3af):  $^1\text{H}$  NMR (300 MHz,  $\text{CDCl}_3$ ):

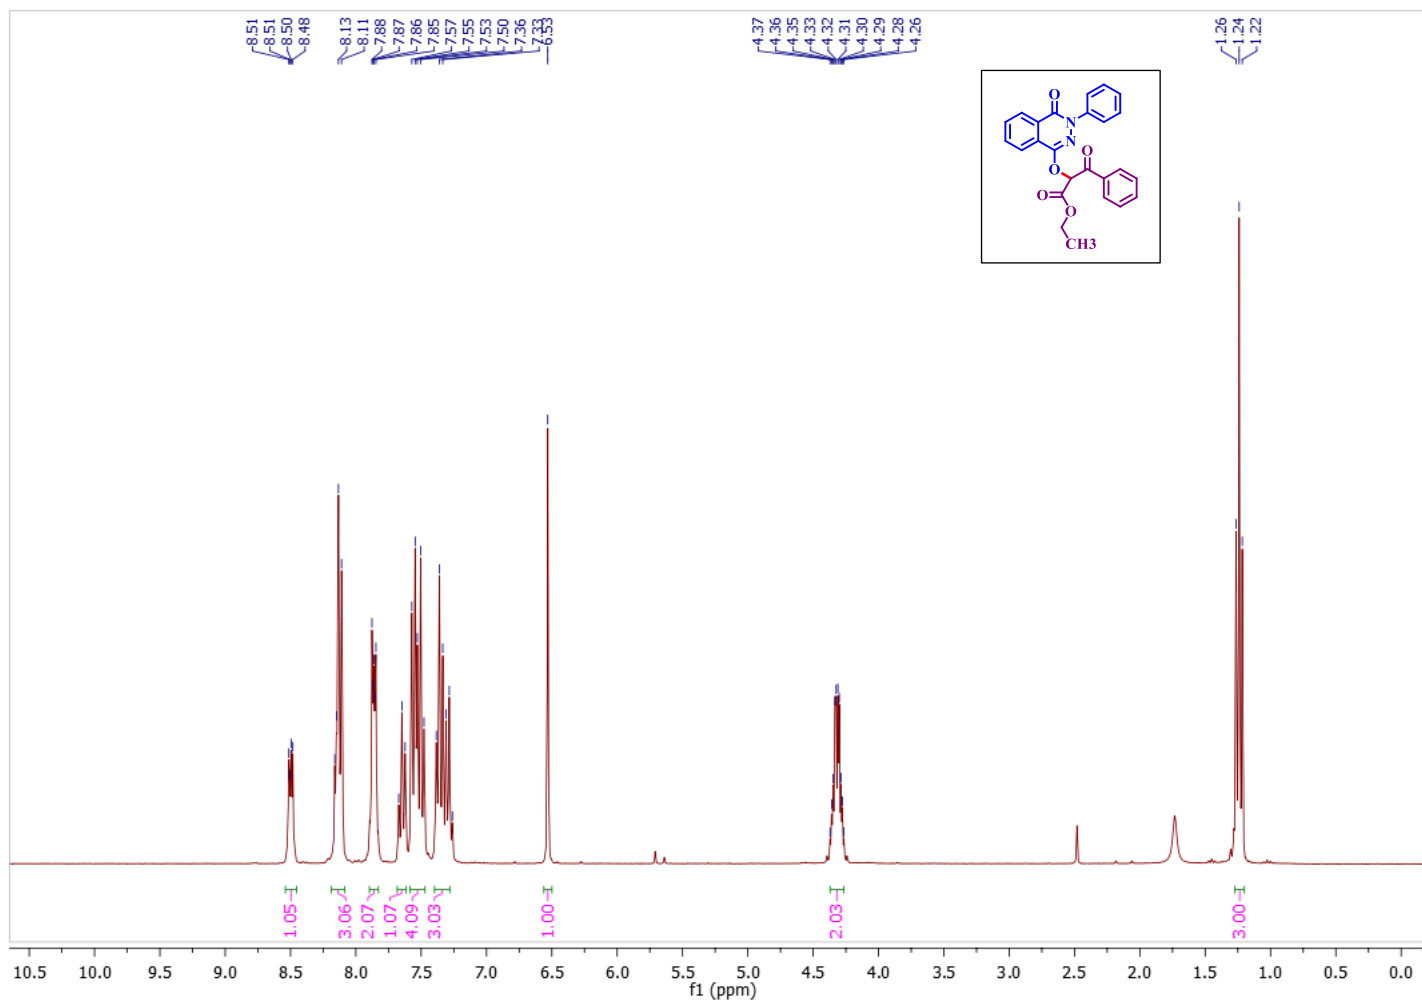

ethyl 3-oxo-2-((4-oxo-3-phenyl-3,4-dihydrophthalazin-1-yl)oxy)-3-phenylpropanoate (3af):  $^1\text{H}$  NMR (300 MHz,  $\text{CDCl}_3$ ):

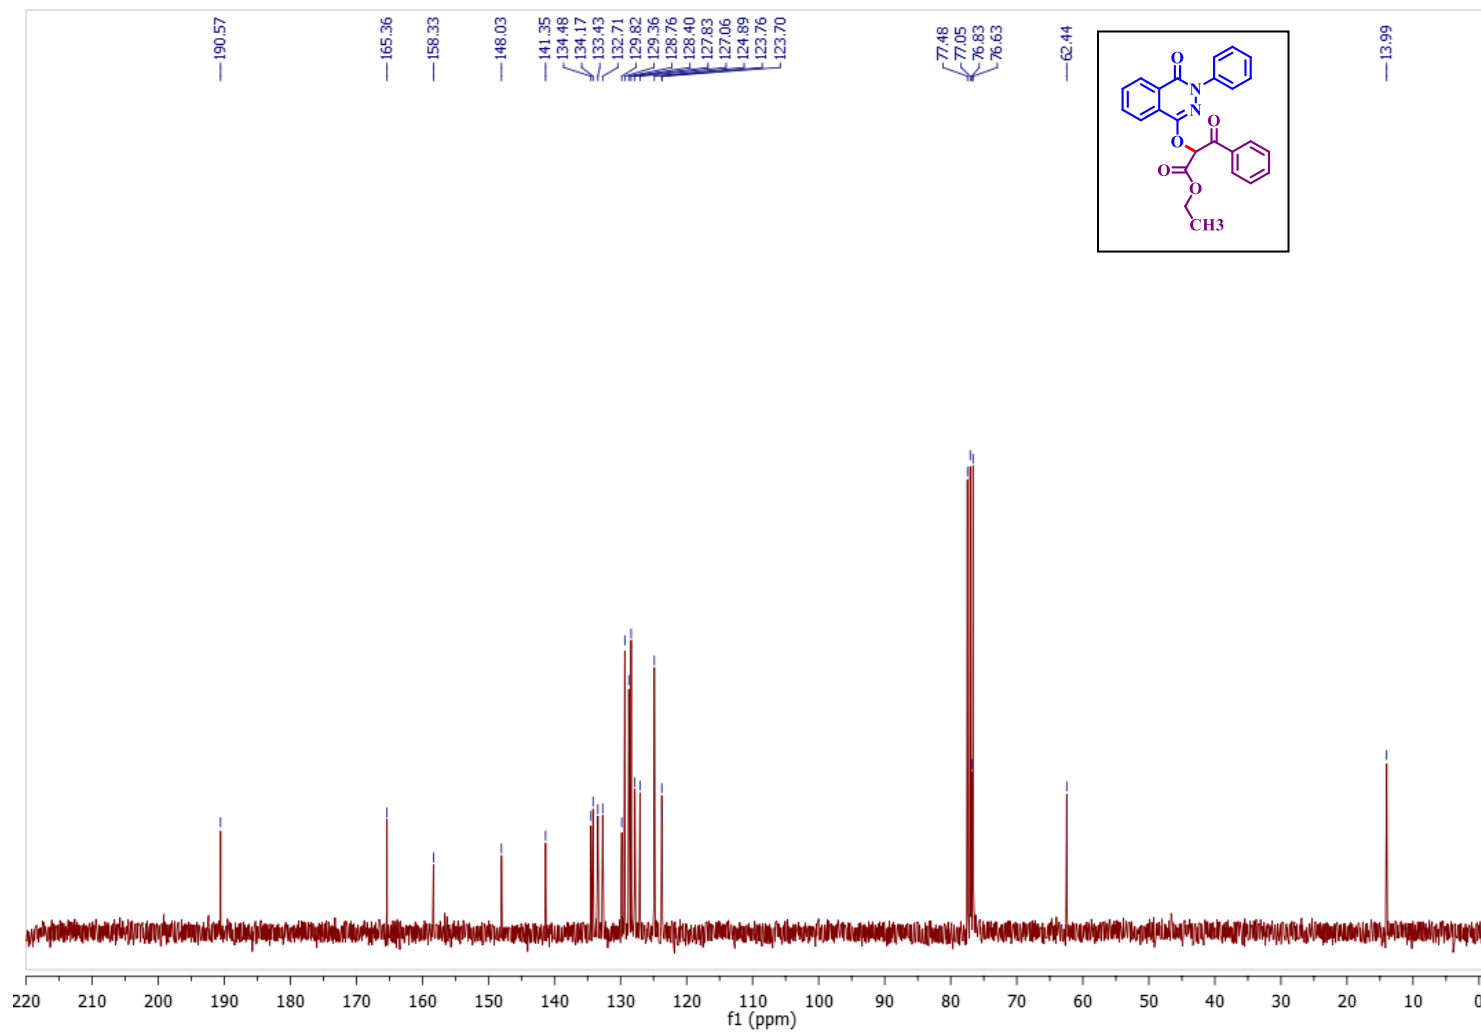

ethyl 3-(4-bromophenyl)-3-oxo-2-((4-oxo-3-phenyl-3,4-dihydrophthalazin-1-yl)oxy)propanoate (3ag):  $^1\text{H}$  NMR (300 MHz,  $\text{CDCl}_3$ ):

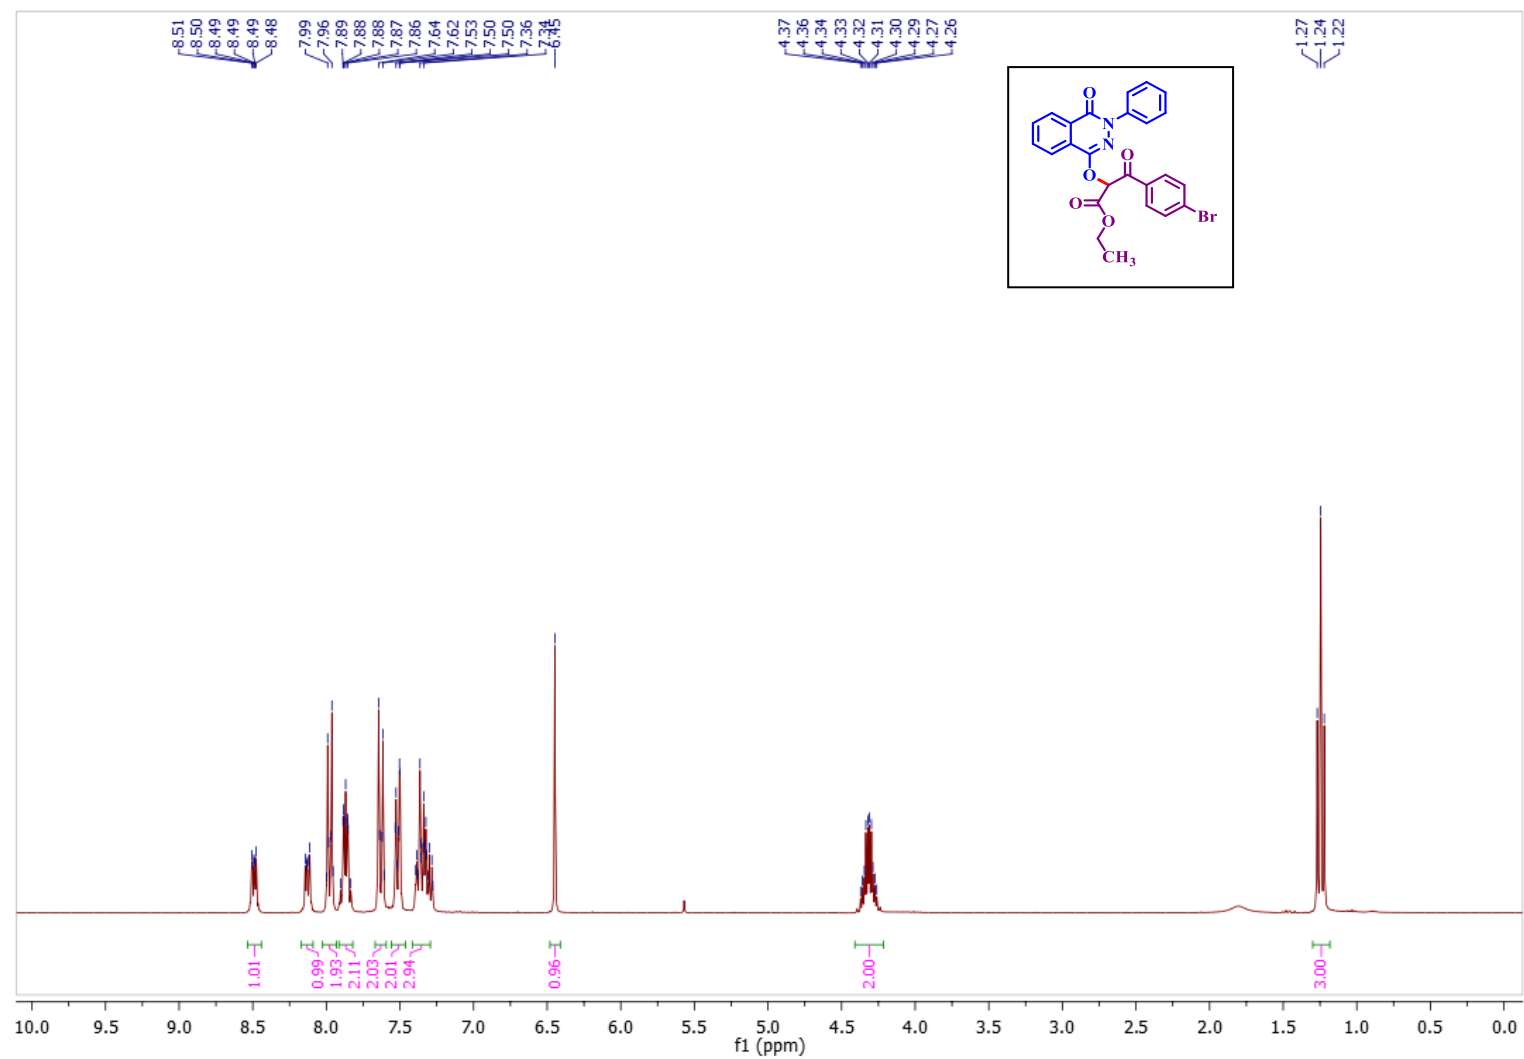

ethyl 3-(4-bromophenyl)-3-oxo-2-((4-oxo-3-phenyl-3,4-dihydrophthalazin-1-yl)oxy)propanoate (3ag):  $^{13}\text{C}$  NMR (75 MHz,  $\text{CDCl}_3$ ):

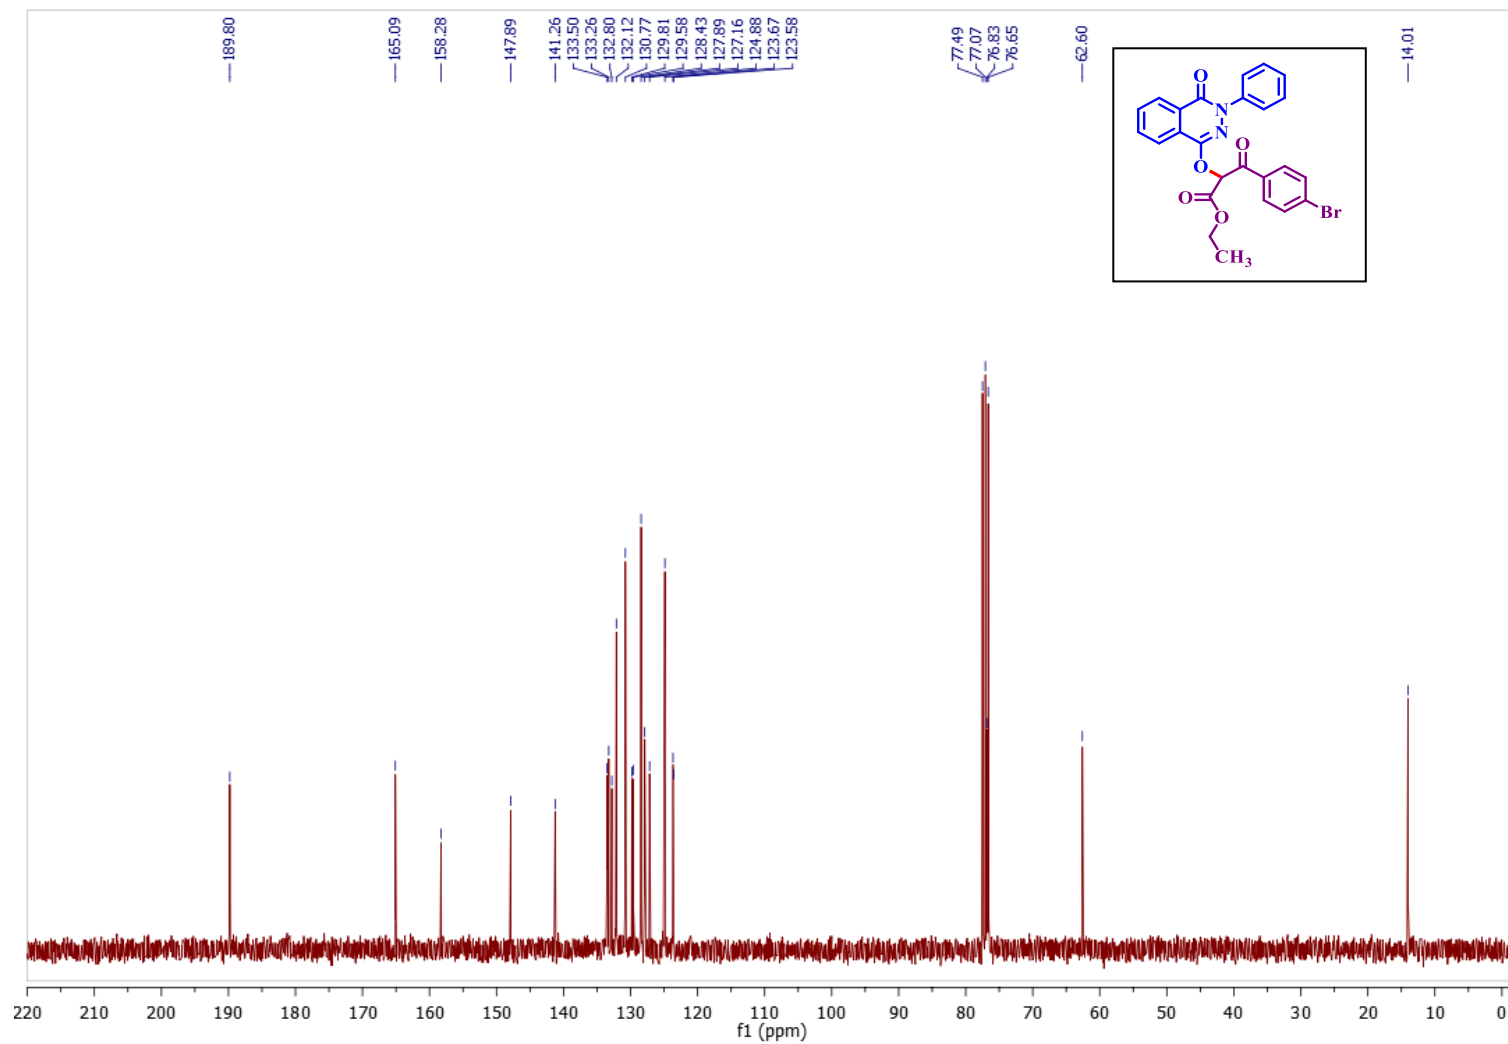



dimethyl 2-((4-oxo-3-phenyl-3,4-dihydrophthalazin-1-yl)oxy)malonate (3ah):  $^1\text{H}$  NMR (300 MHz,  $\text{CDCl}_3$ ):

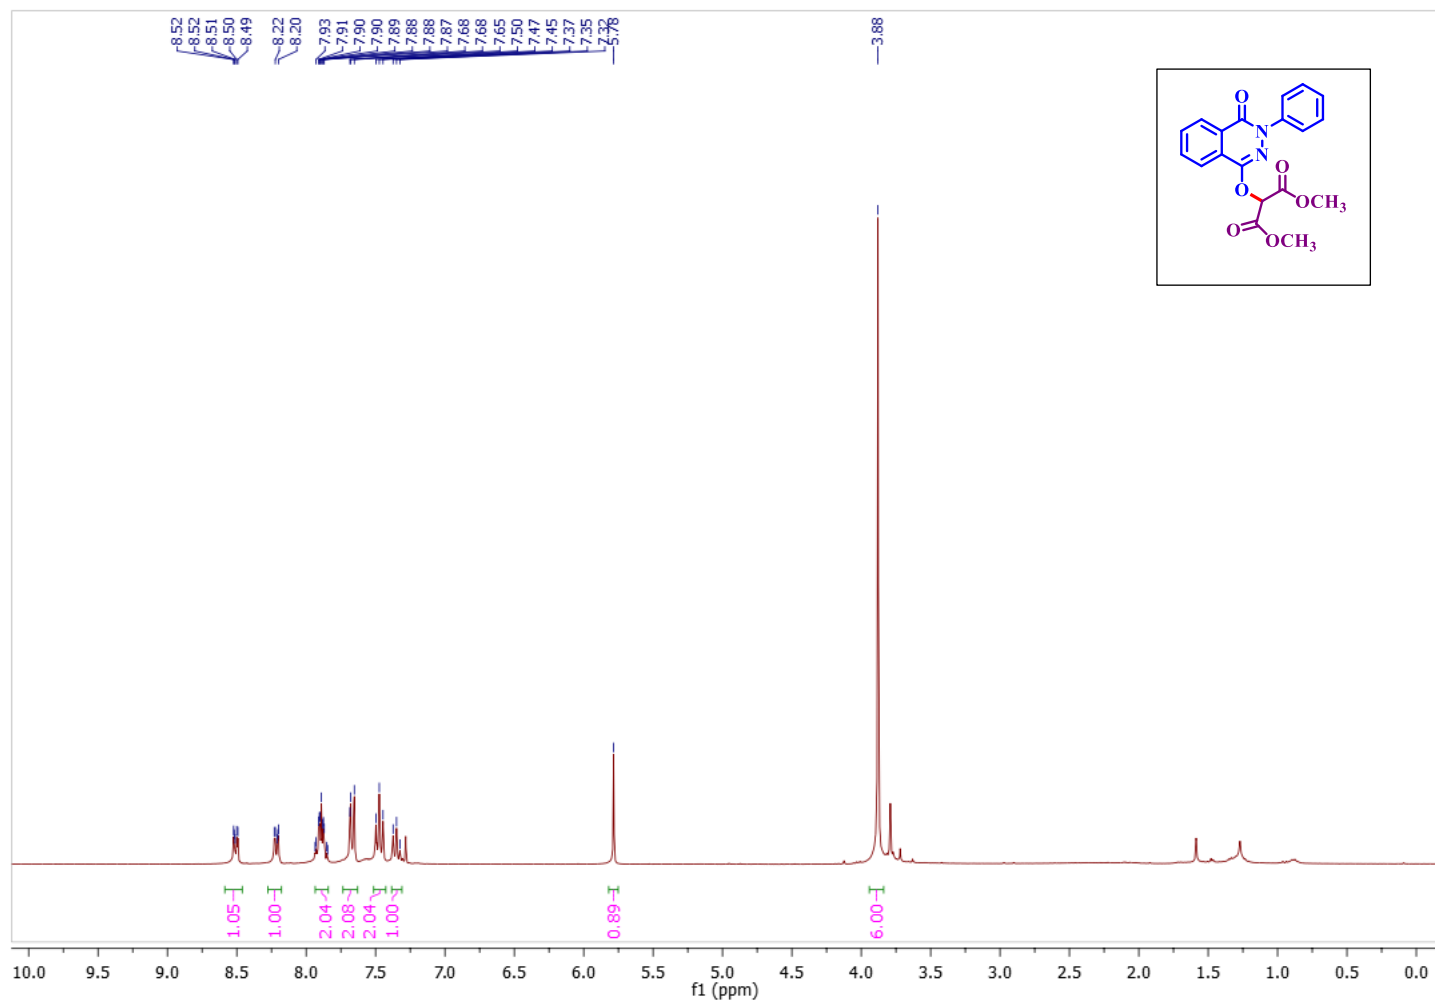

dimethyl 2-((4-oxo-3-phenyl-3,4-dihydrophthalazin-1-yl)oxy)malonate (3ah):  $^{13}\text{C}$  NMR (75 MHz,  $\text{CDCl}_3$ ):

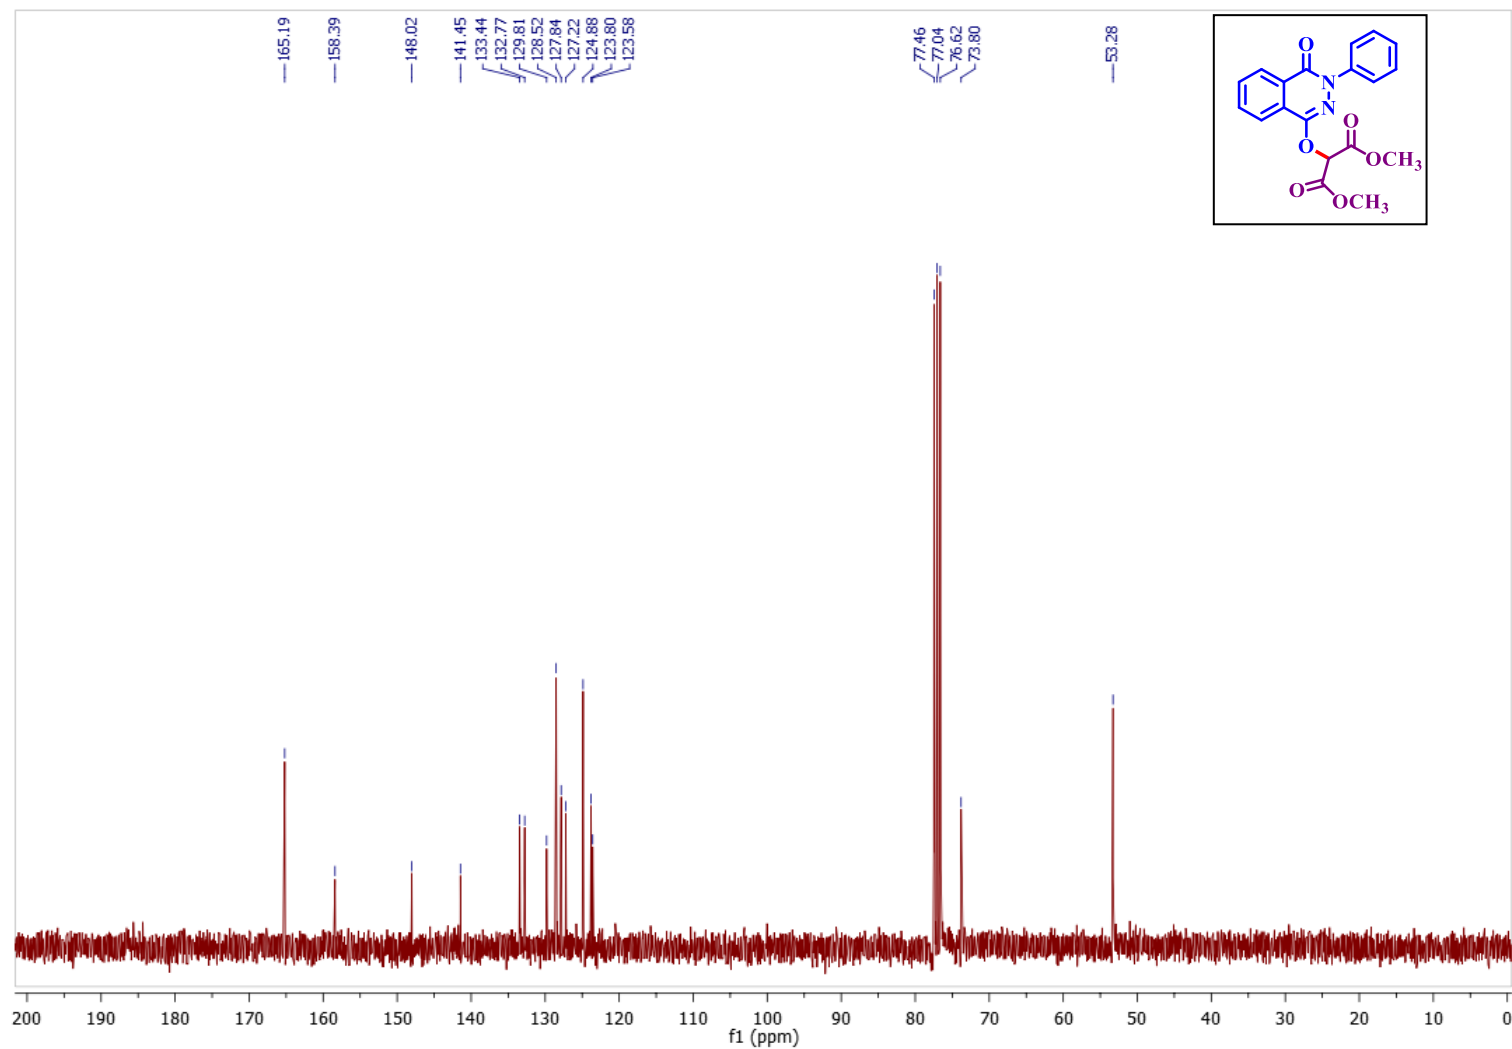

**tert-butyl 3-oxo-2-((4-oxo-3-phenyl-3,4-dihydrophthalazin-1-yl)oxy)butanoate (3ai): <sup>1</sup>H NMR (300 MHz, CDCl<sub>3</sub>):**

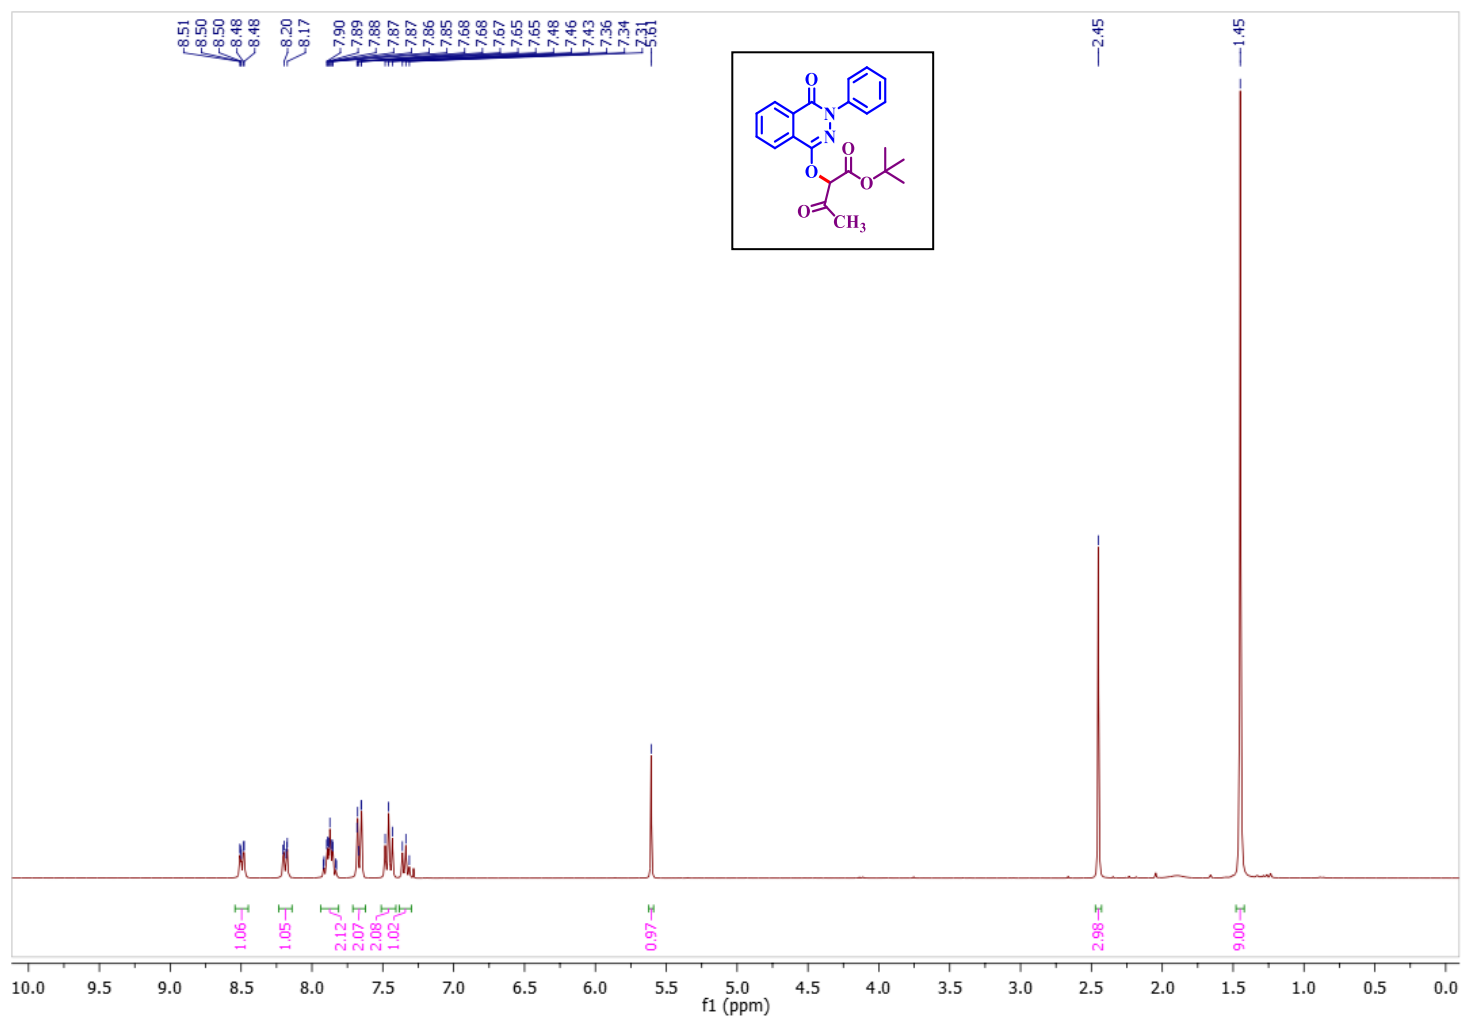

tert-butyl 3-oxo-2-((4-oxo-3-phenyl-3,4-dihydrophthalazin-1-yl)oxy)butanoate (3ai):  $^{13}\text{C}$  NMR (75 MHz,  $\text{CDCl}_3$ ):

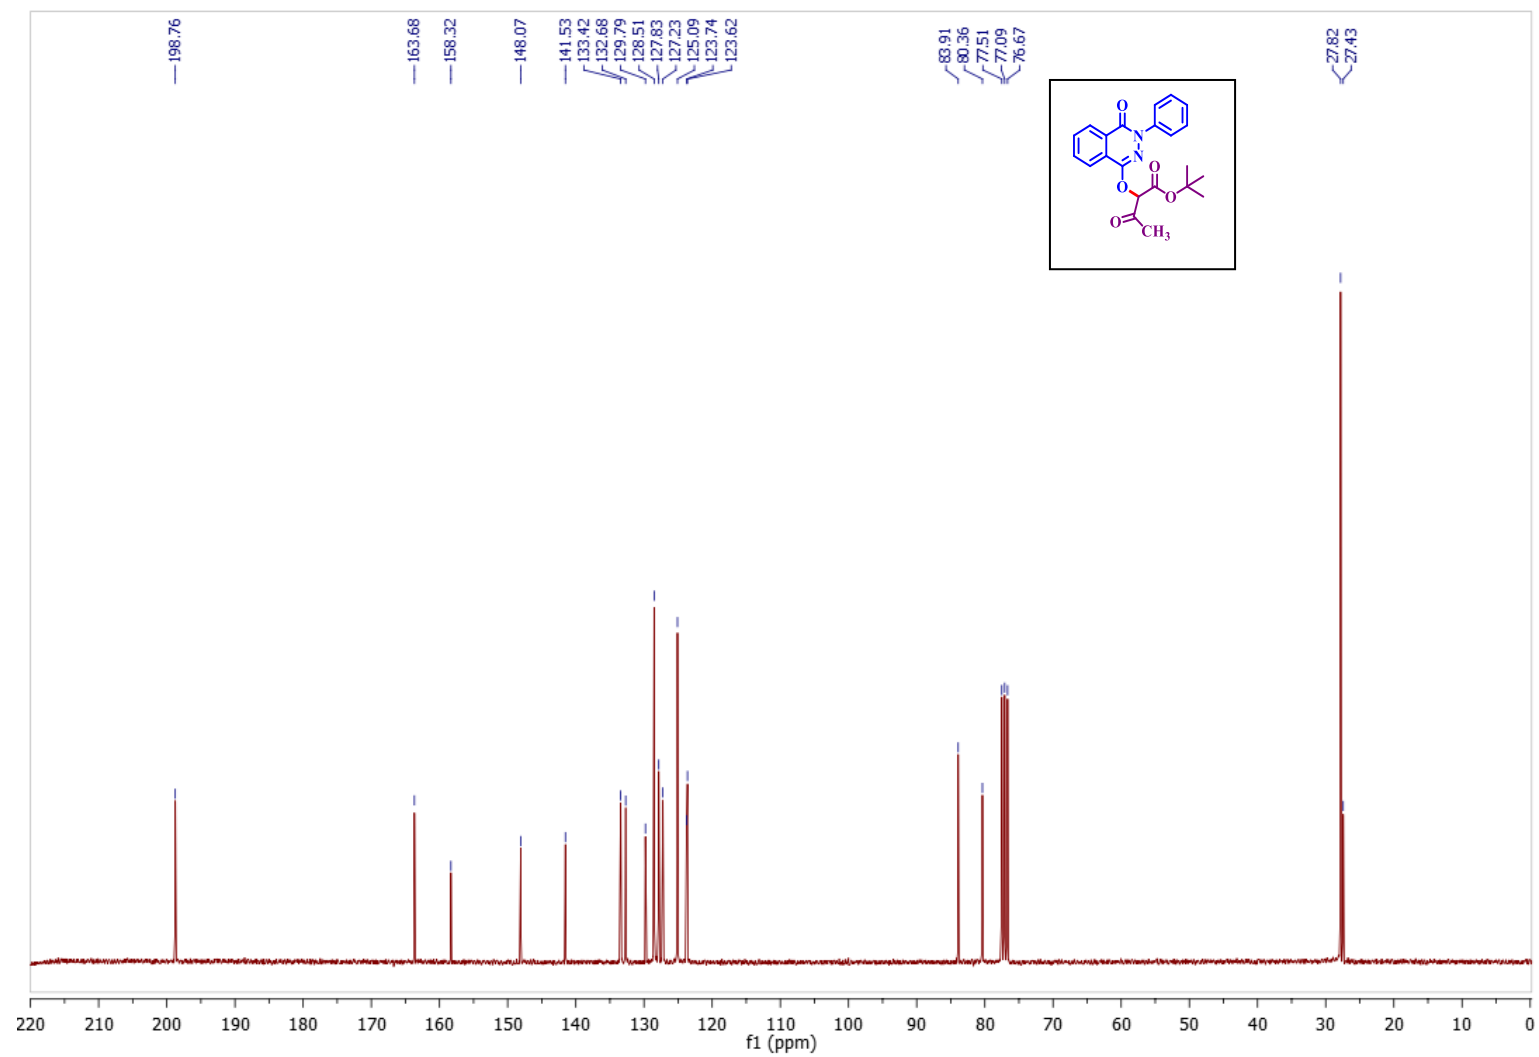

diethyl 2-((4-oxo-3-phenyl-3,4-dihydrophthalazin-1-yl)oxy)malonate (3aj): <sup>1</sup>H NMR (300 MHz, CDCl<sub>3</sub>):

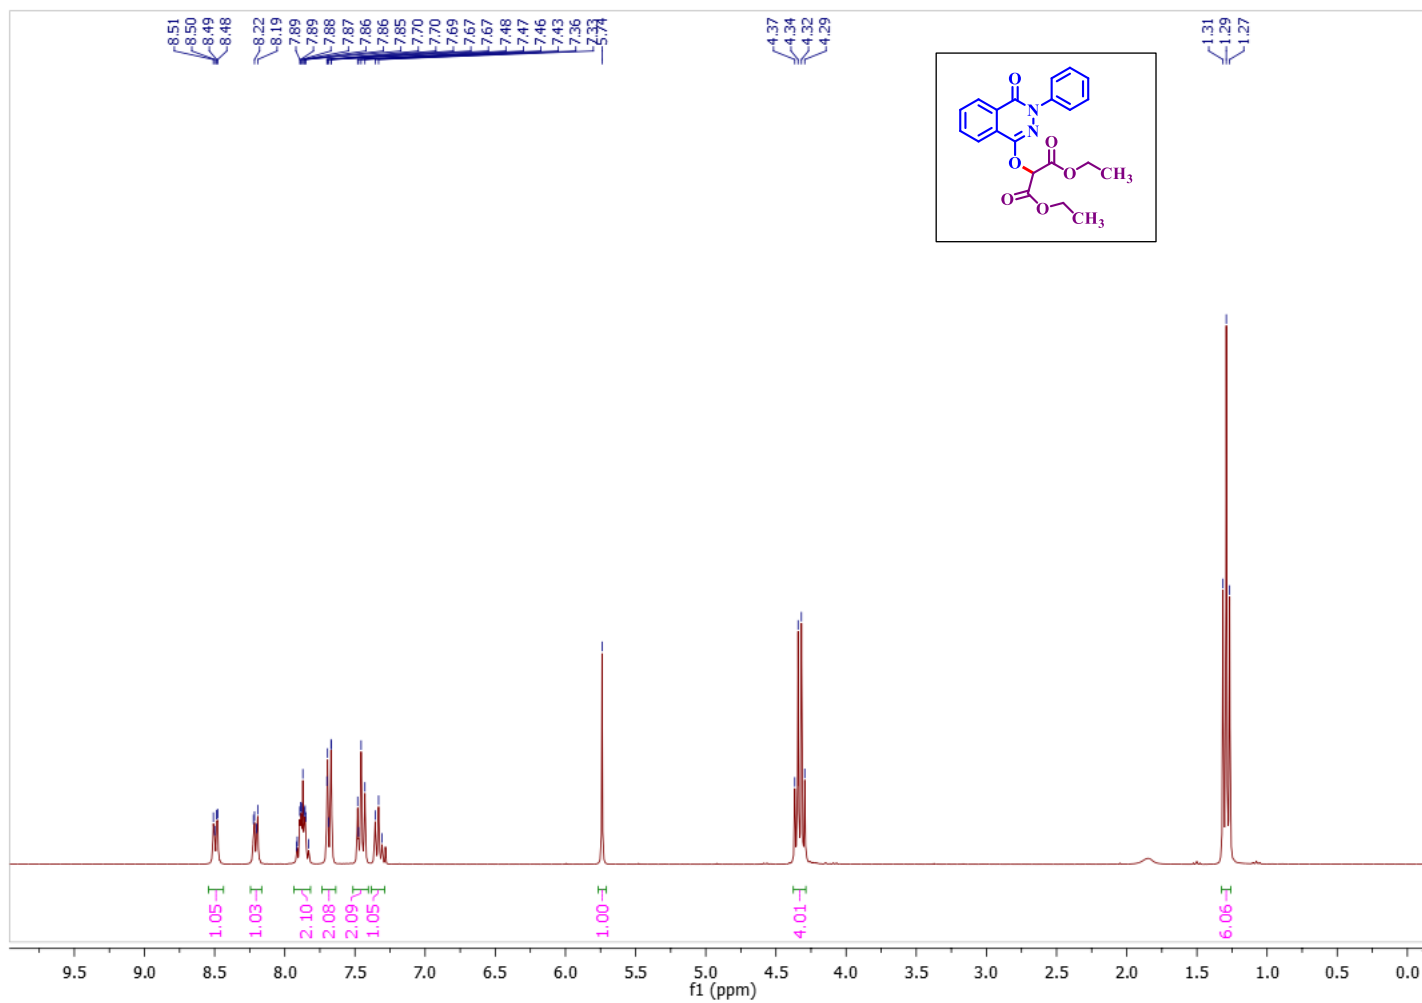

diethyl 2-((4-oxo-3-phenyl-3,4-dihydrophthalazin-1-yl)oxy)malonate (3aj):  $^{13}\text{C}$  NMR (75 MHz,  $\text{CDCl}_3$ ):

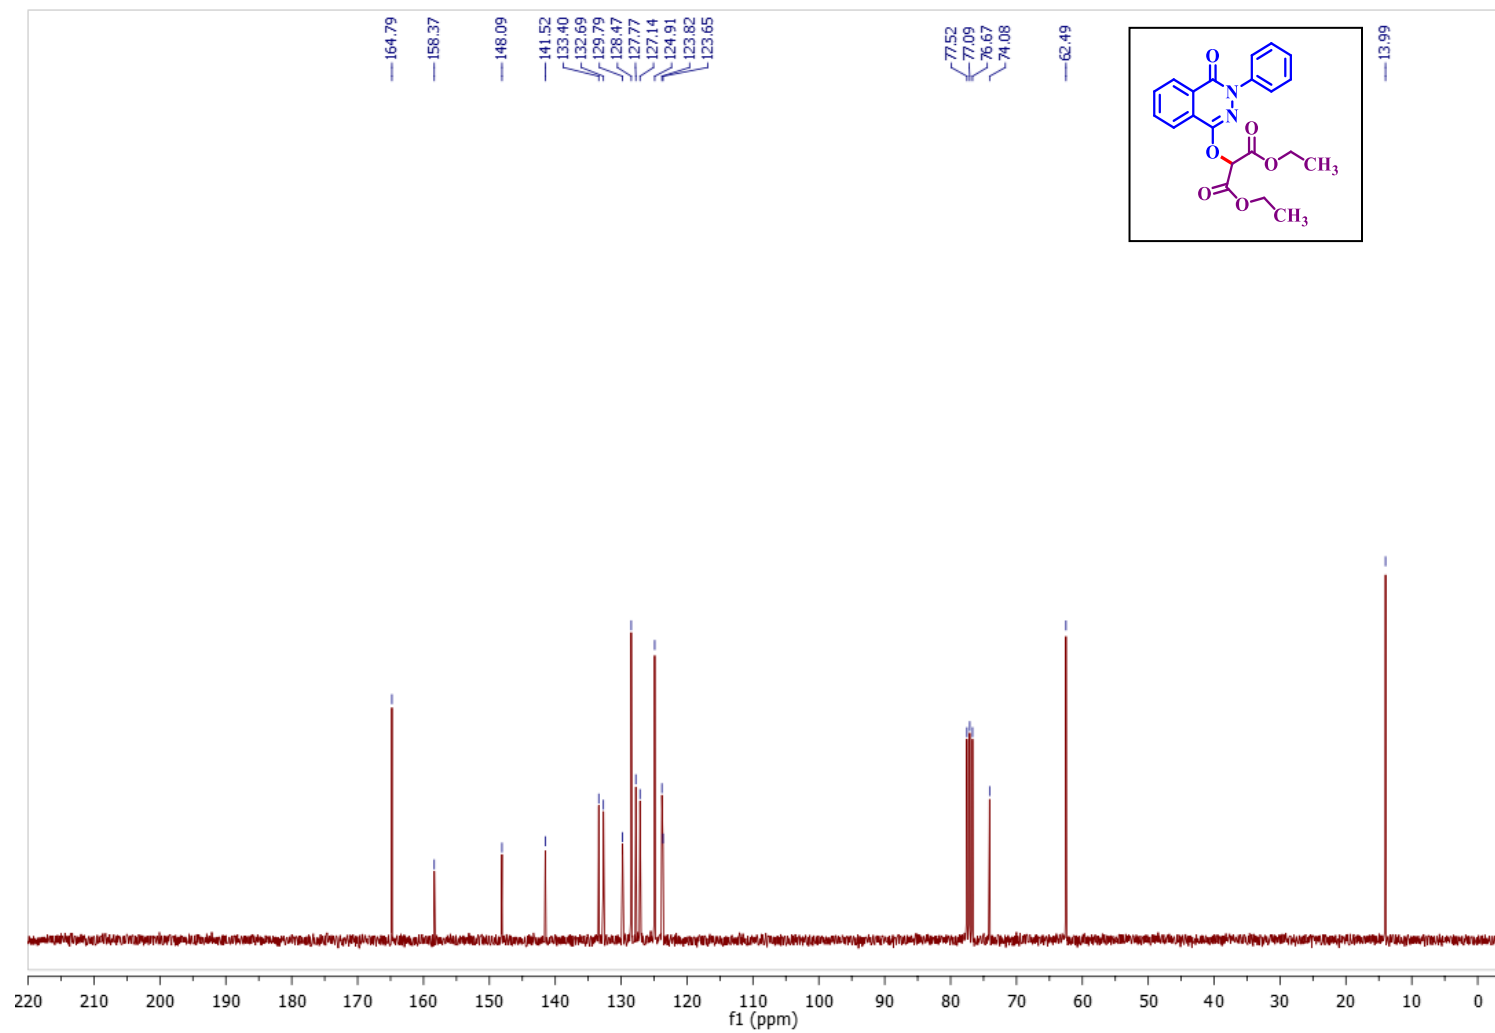

4-(2-oxo-1,2-diphenylethoxy)-2-phenylphthalazin-1(2H)-one (3ak): <sup>1</sup>H NMR (300 MHz, CDCl<sub>3</sub>):

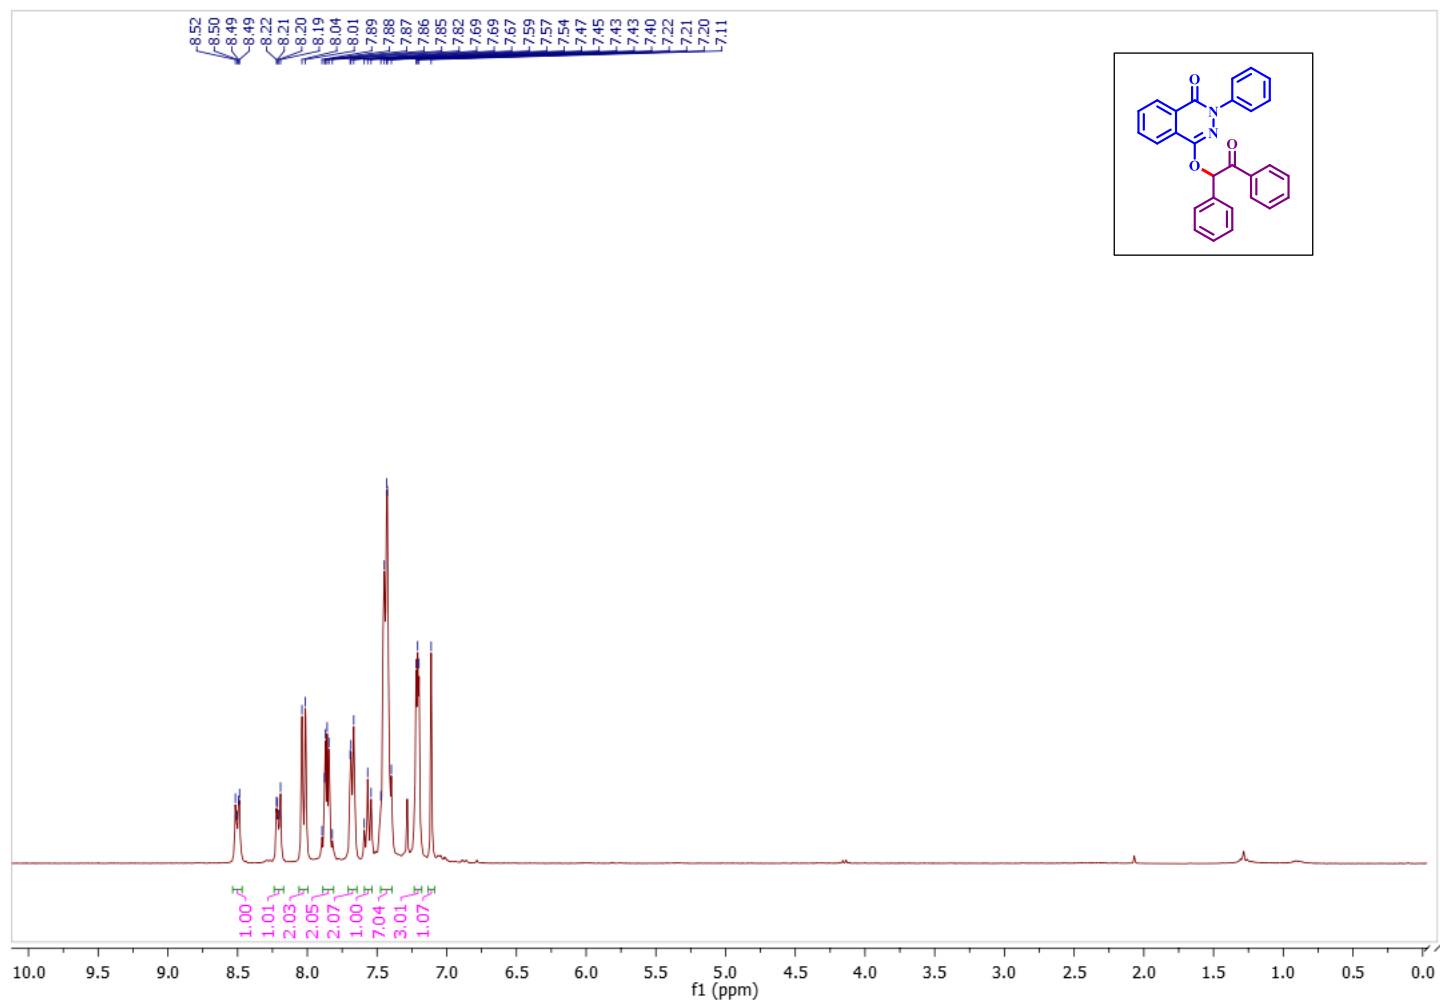

4-(2-oxo-1,2-diphenylethoxy)-2-phenylphthalazin-1(2H)-one (3ak):  $^{13}\text{C}$  NMR (75 MHz,  $\text{CDCl}_3$ ):

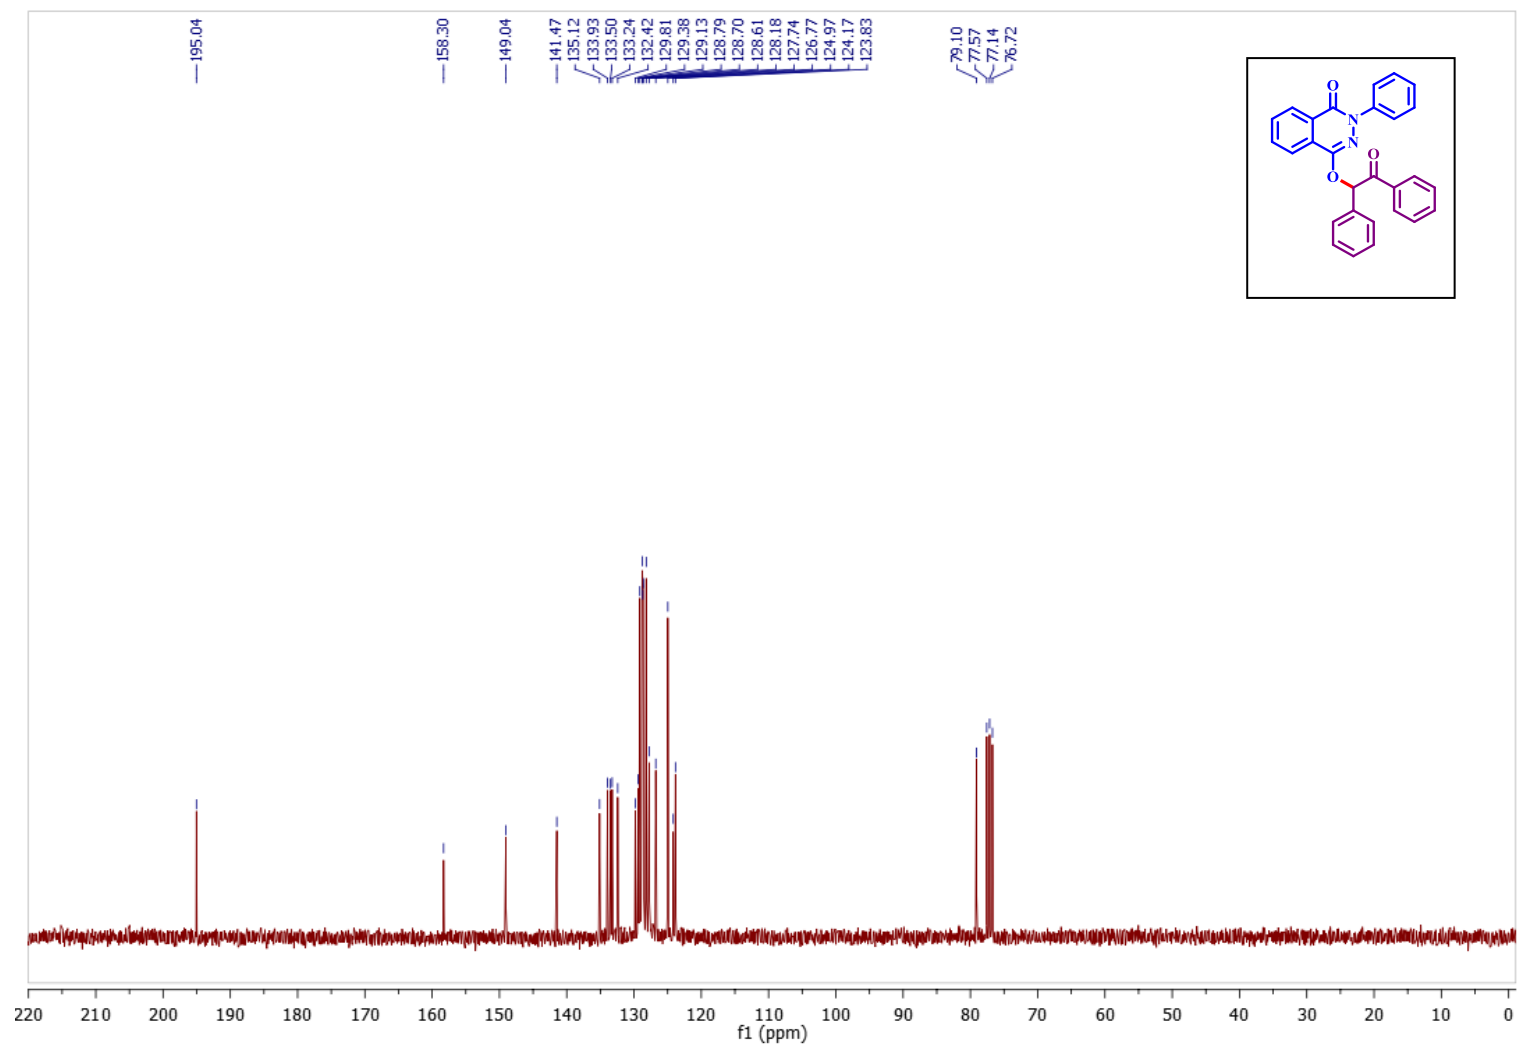



**2-((4-oxo-3-phenyl-3,4-dihydrophthalazin-1-yl)oxy)-1,3-diphenylpropane-1,3-dione (3a1): <sup>1</sup>H NMR (300 MHz, CDCl<sub>3</sub>):**

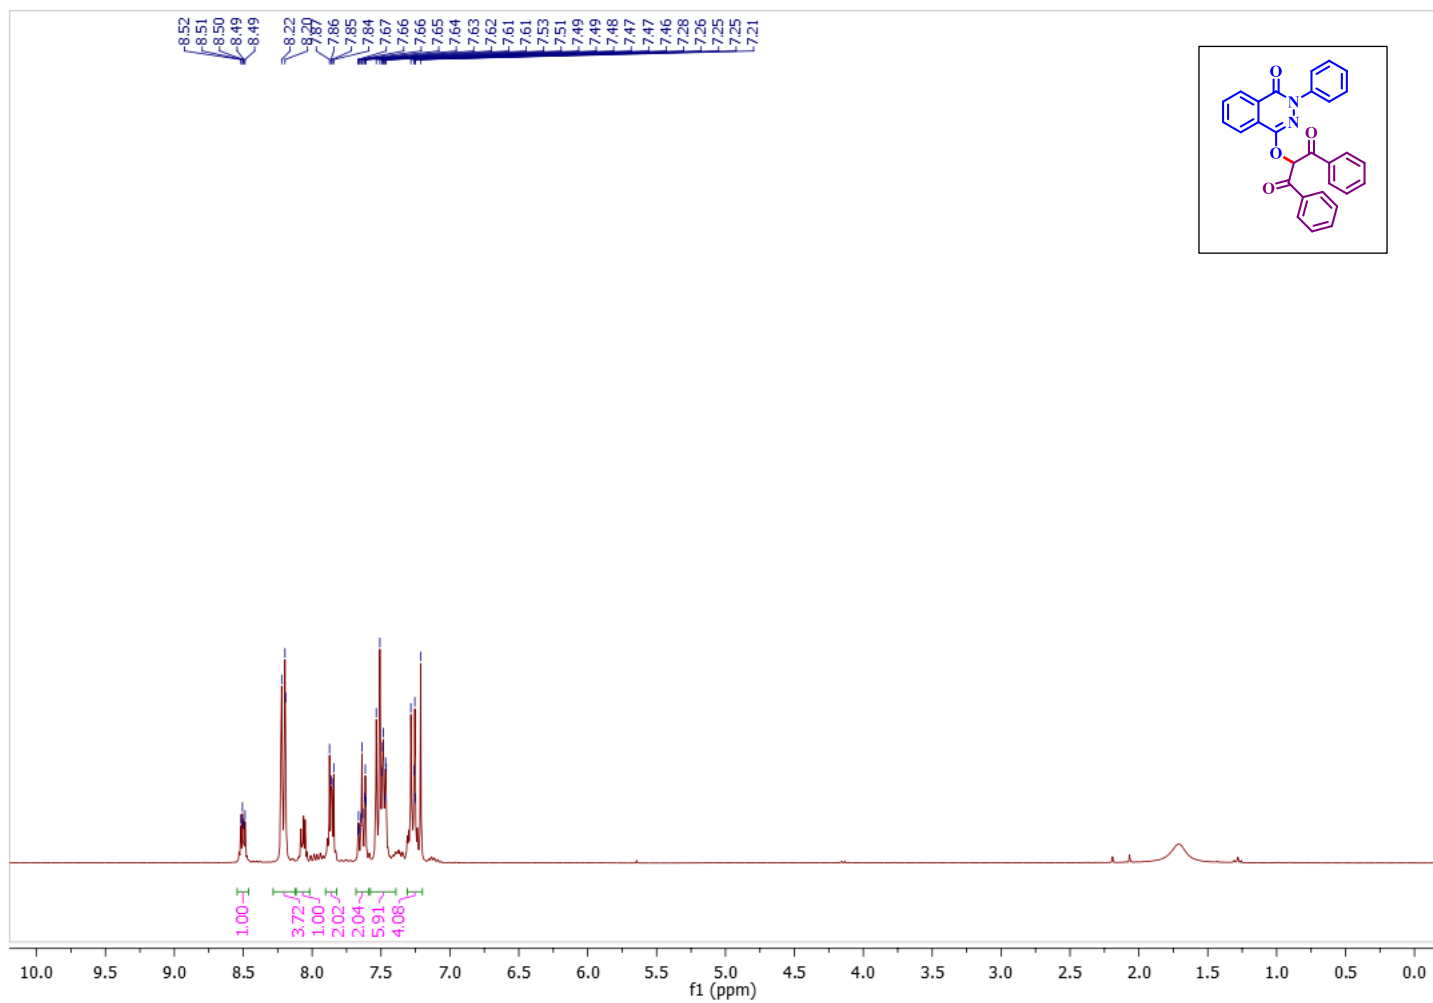

**2-((4-oxo-3-phenyl-3,4-dihydrophthalazin-1-yl)oxy)-1,3-diphenylpropane-1,3-dione (3al):  $^{13}\text{C}$  NMR (75 MHz,  $\text{CDCl}_3$ ):**

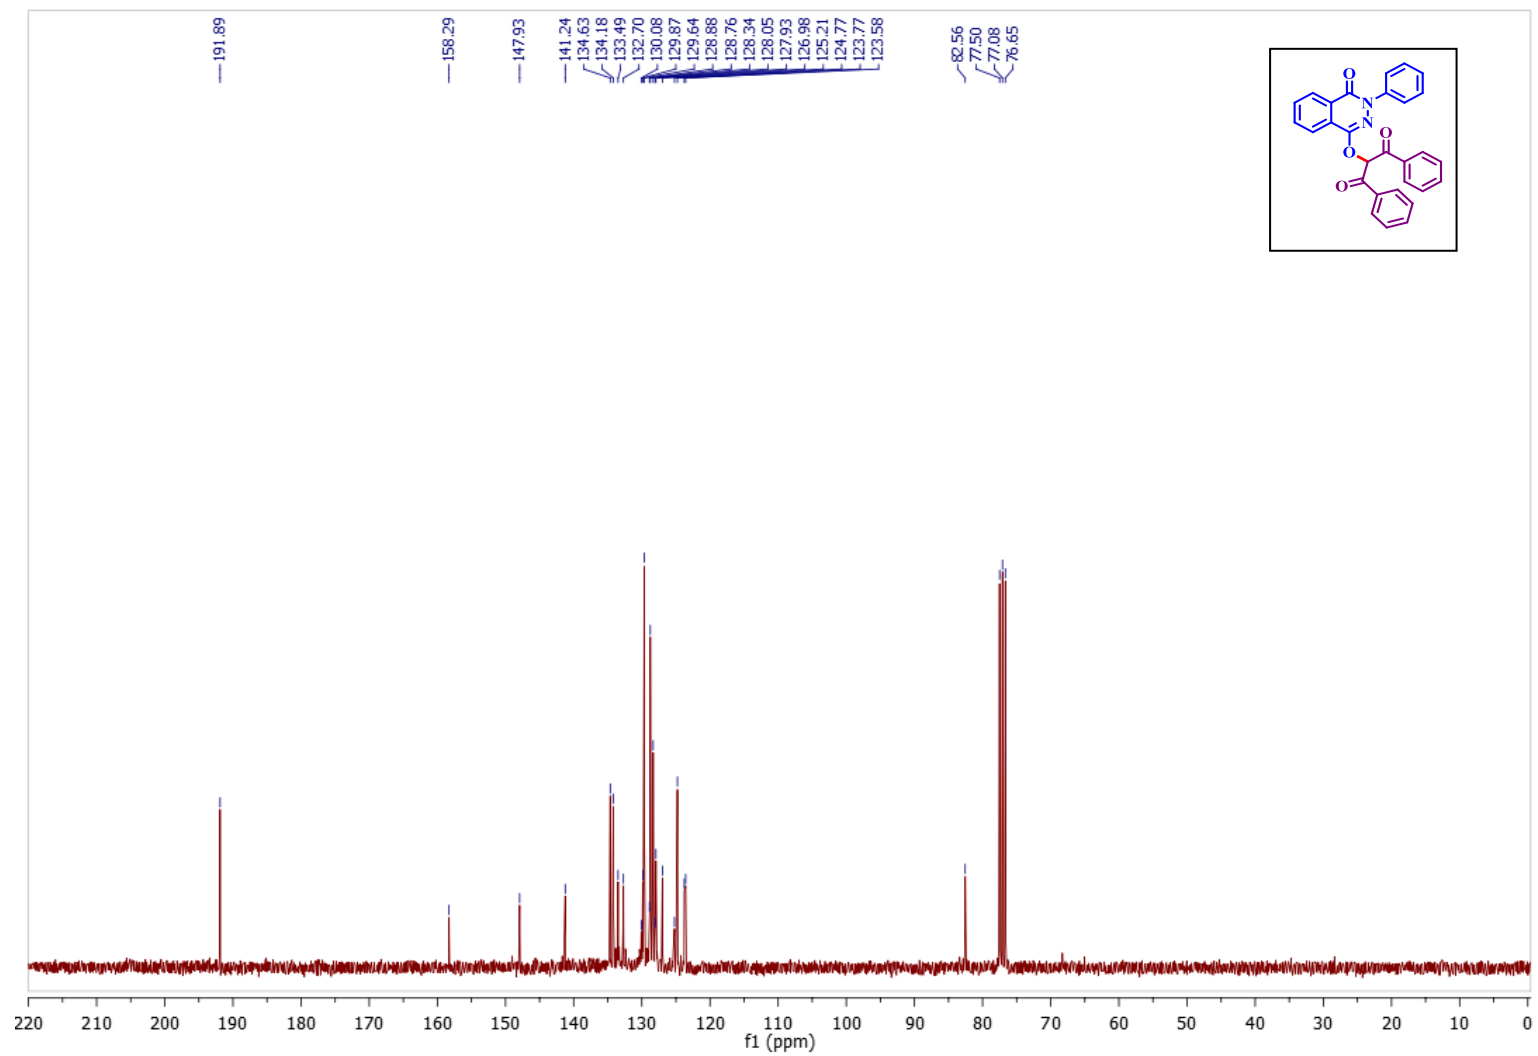

2-((4-oxo-3-phenyl-3,4-dihydrophthalazin-1-yl)oxy)-1-phenylbutane-1,3-dione (3am):  $^1\text{H}$  NMR (300 MHz,  $\text{CDCl}_3$ ):

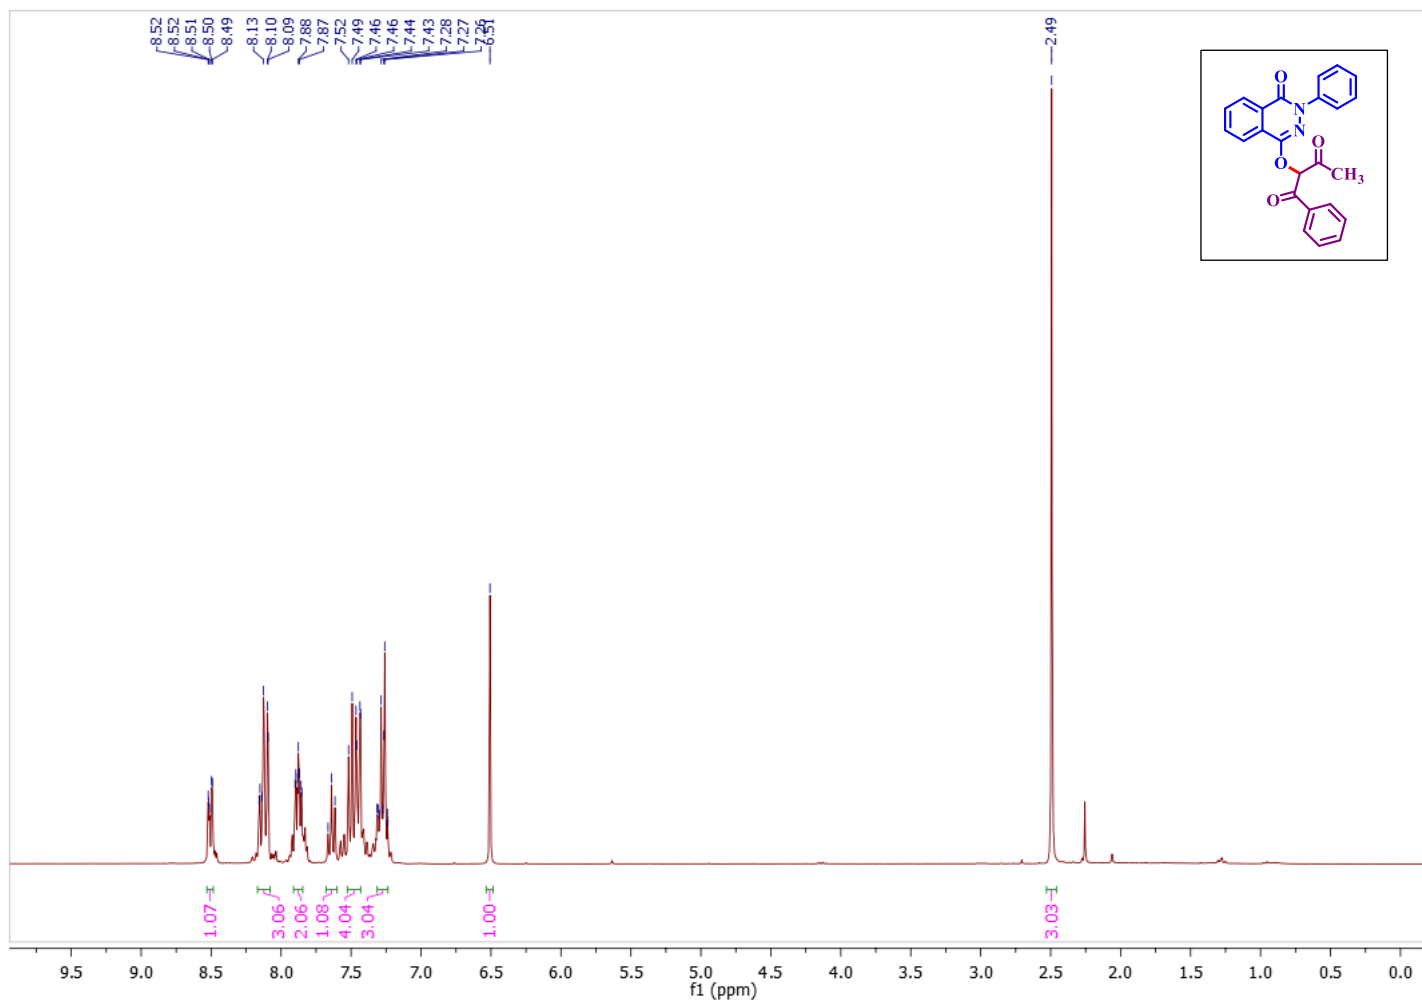

2-((4-oxo-3-phenyl-3,4-dihydrophthalazin-1-yl)oxy)-1-phenylbutane-1,3-dione (3am):  $^{13}\text{C}$  NMR (75 MHz,  $\text{CDCl}_3$ ):

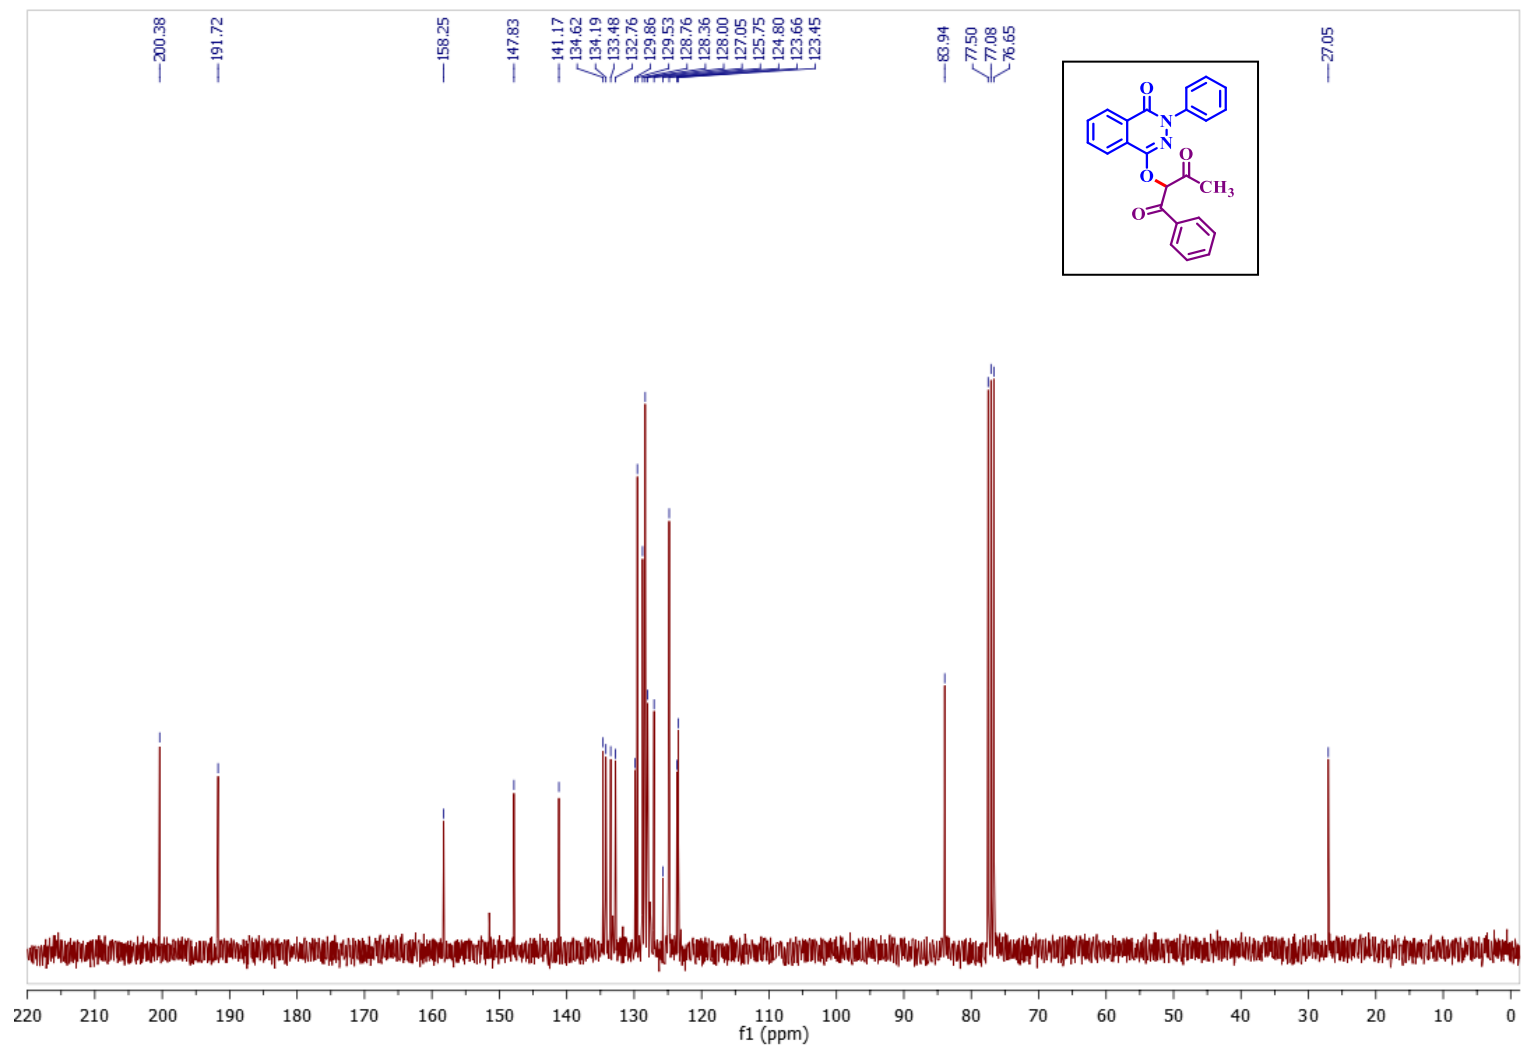

**4-((1-oxo-1-phenylpropan-2-yl)oxy)-2-phenylphthalazin-1(2H)-one (3an): <sup>1</sup>H NMR (300 MHz, CDCl<sub>3</sub>):**

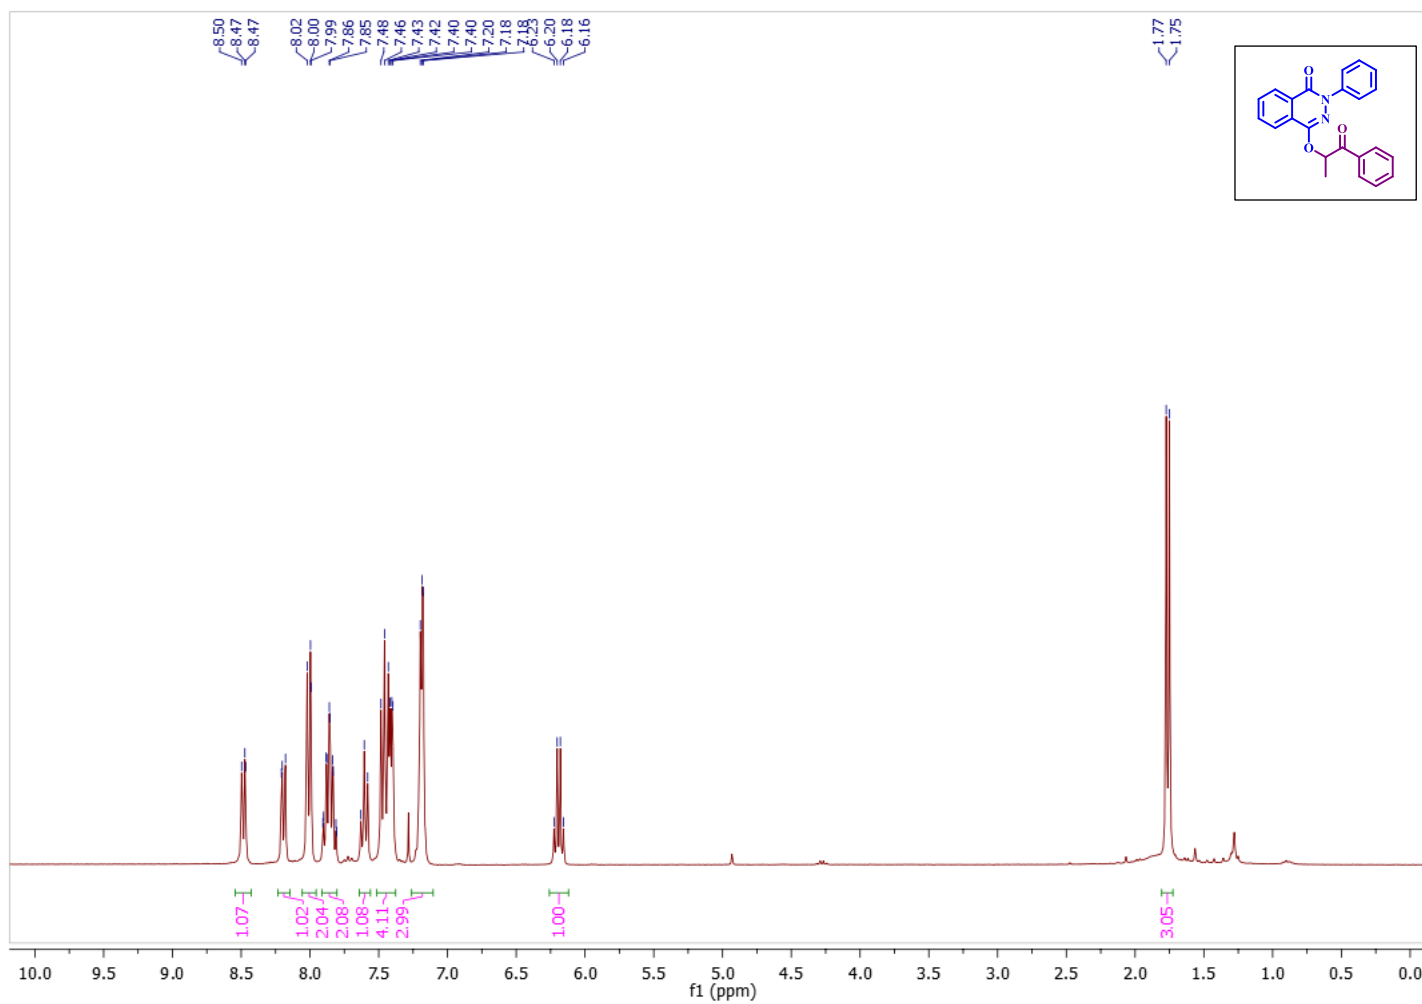

4-((1-oxo-1-phenylpropan-2-yl)oxy)-2-phenylphthalazin-1(2H)-one (3an):  $^{13}\text{C}$  NMR (75 MHz,  $\text{CDCl}_3$ ):

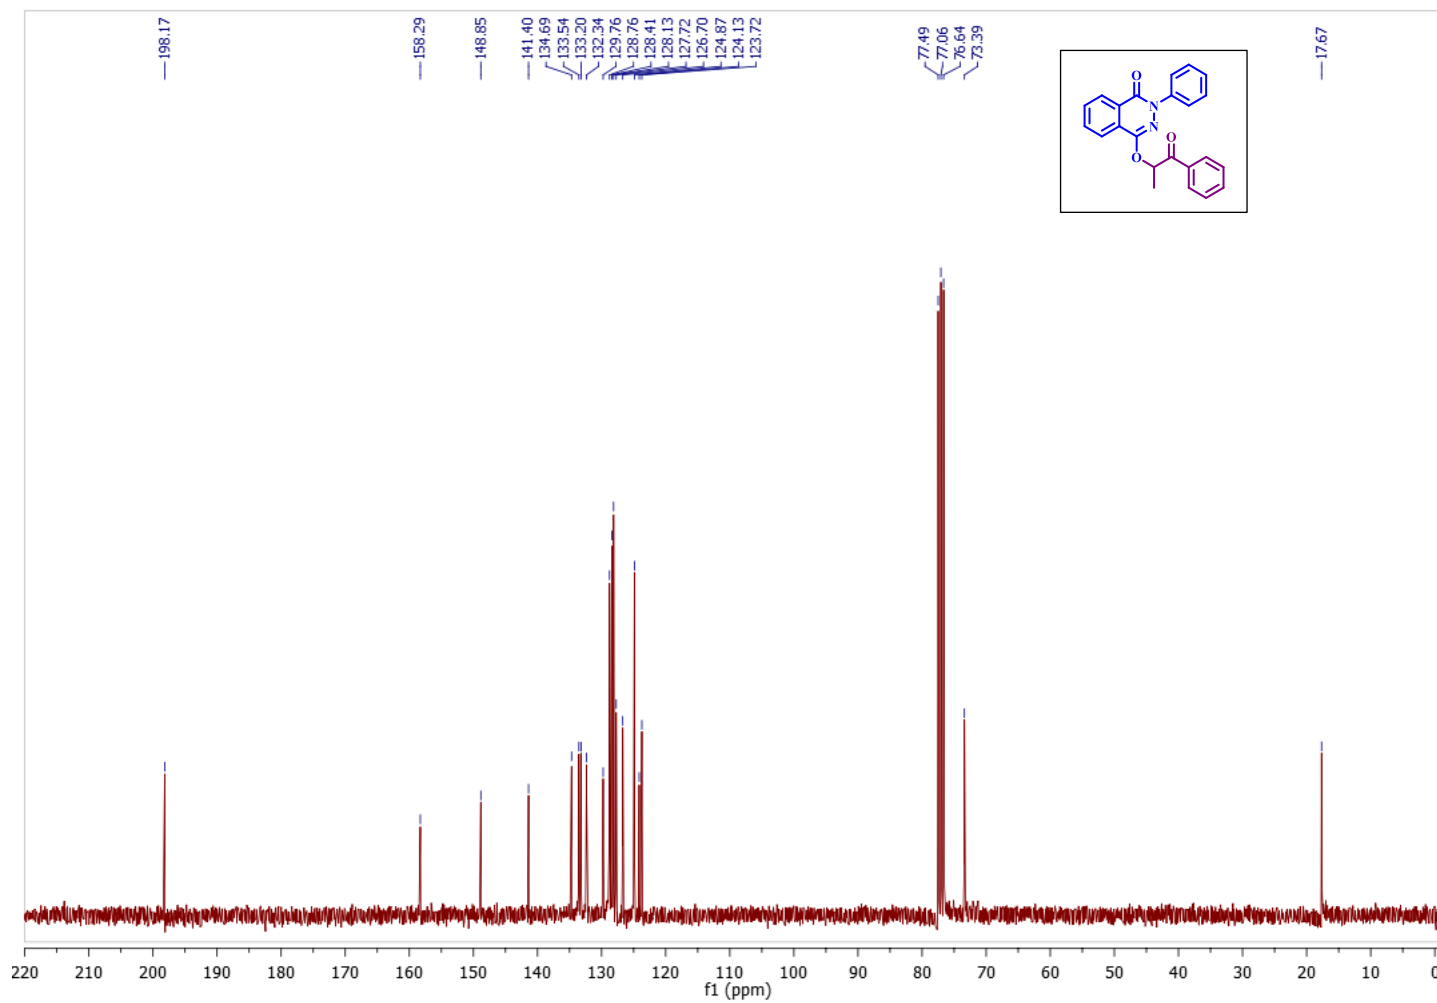

ethyl 2-cyano-2-((4-oxo-3-phenyl-3,4-dihydrophthalazin-1-yl)oxy)acetate (3ao):  $^1\text{H}$  NMR (300 MHz,  $\text{CDCl}_3$ ):

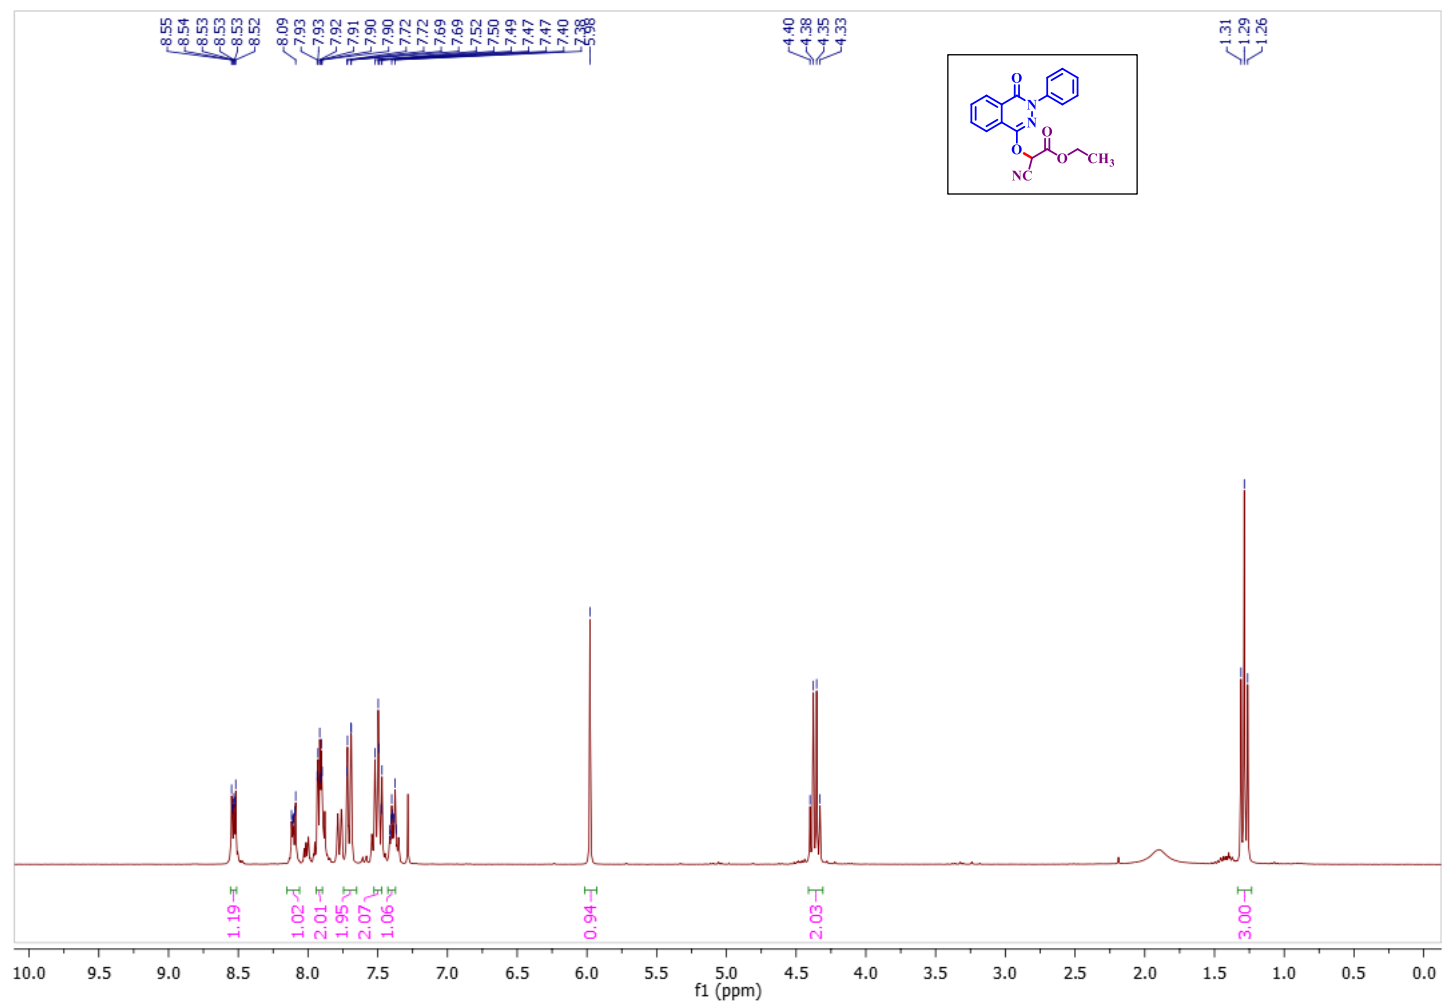

ethyl 2-cyano-2-((4-oxo-3-phenyl-3,4-dihydrophthalazin-1-yl)oxy)acetate (3ao):  $^{13}\text{C}$  NMR (75 MHz,  $\text{CDCl}_3$ ):

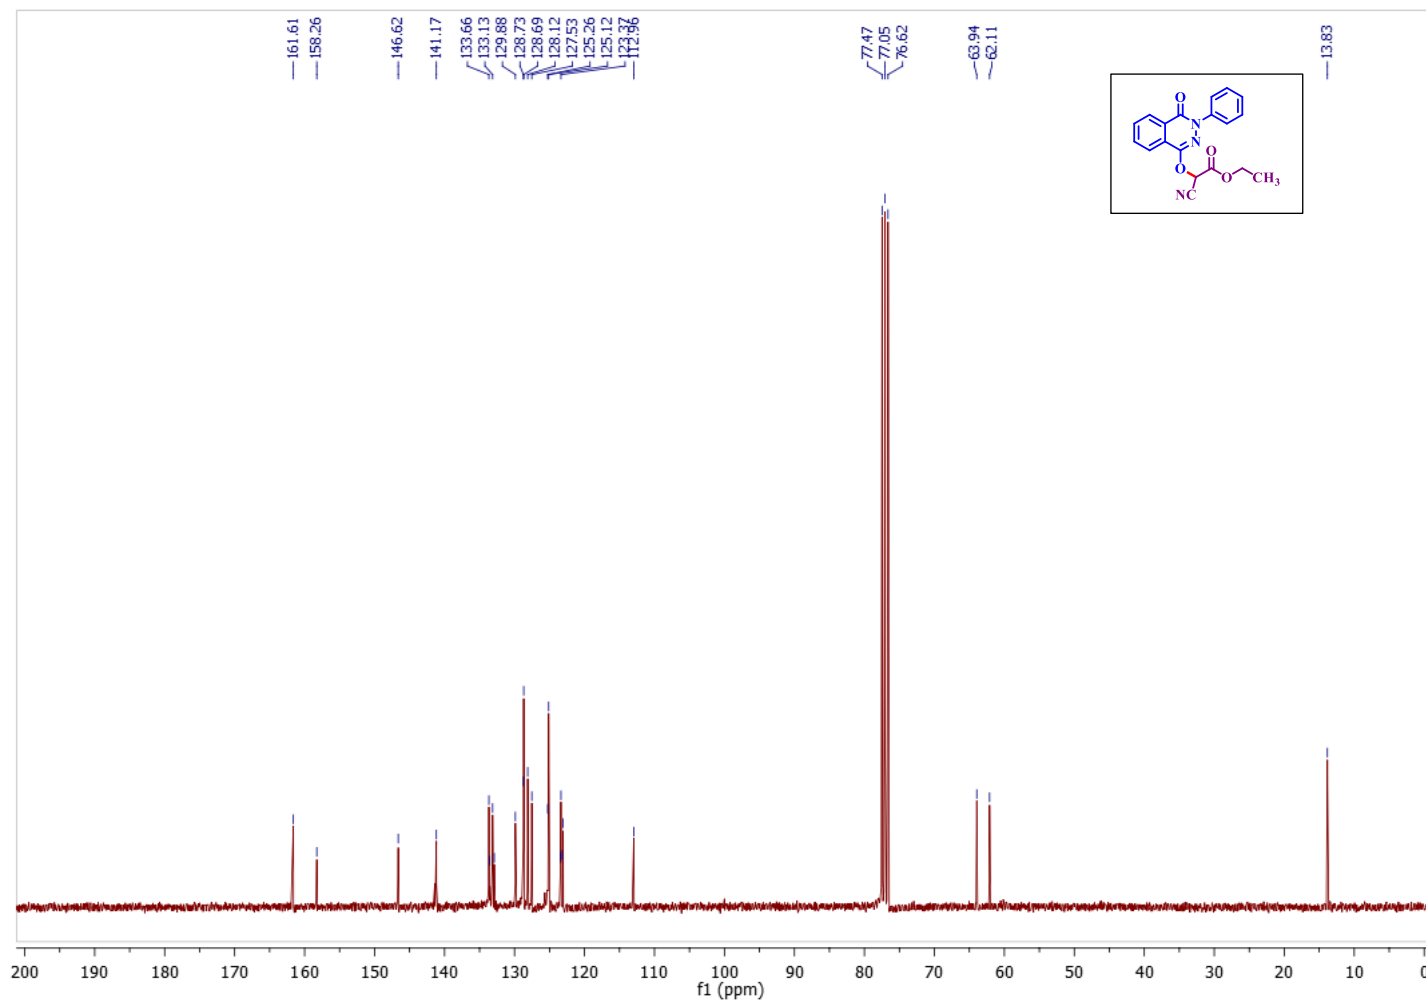



4-oxo-3-phenyl-3,4-dihydrophthalazin-1-yl dimethylcarbamate (3ap): <sup>1</sup>H NMR (300 MHz, CDCl<sub>3</sub>):

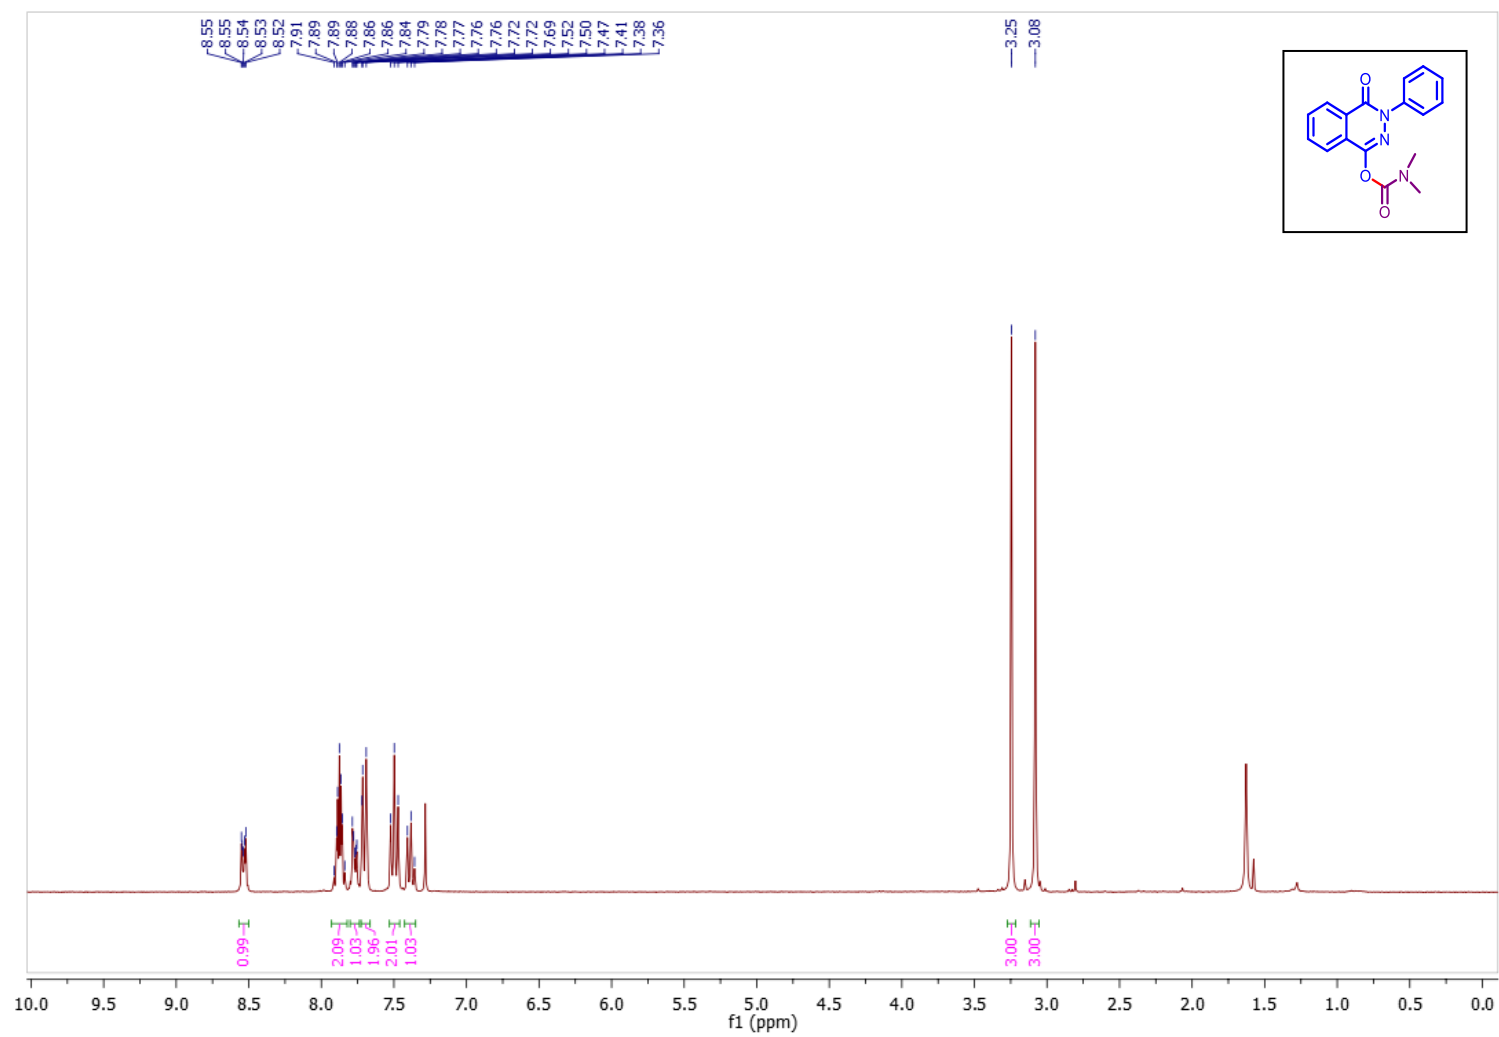

4-oxo-3-phenyl-3,4-dihydrophthalazin-1-yl dimethylcarbamate (3ap):  $^{13}\text{C}$  NMR (75 MHz,  $\text{CDCl}_3$ ):

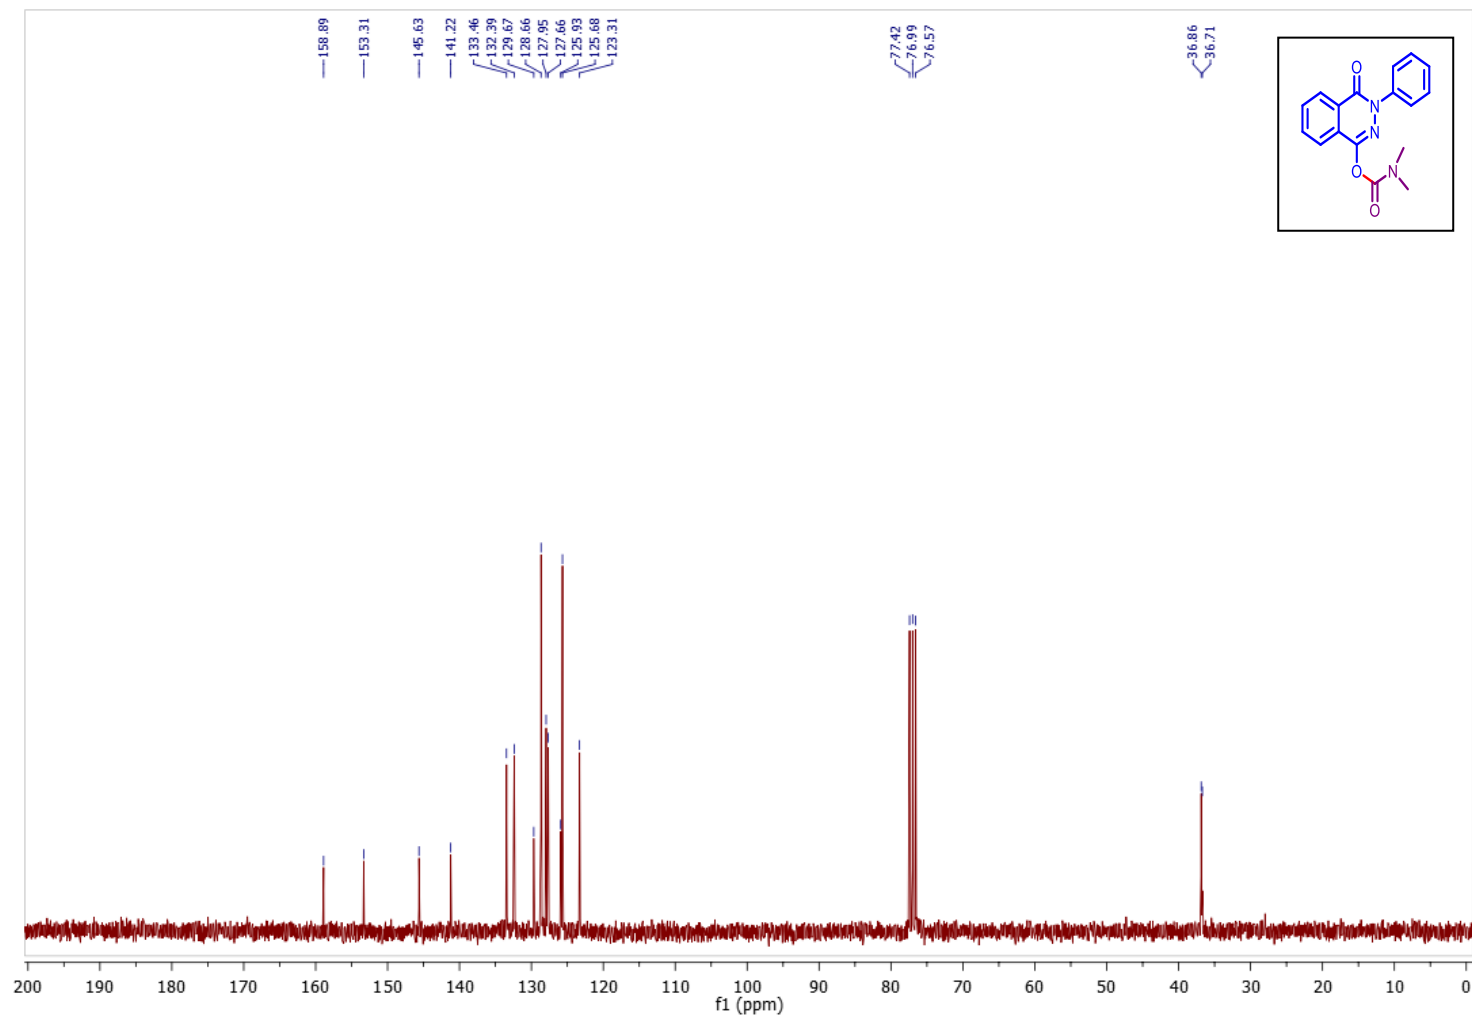

4-(1-nitroethoxy)-2-phenylphthalazin-1(2H)-one (3aq):  $^1\text{H}$  NMR (300 MHz,  $\text{CDCl}_3$ ):

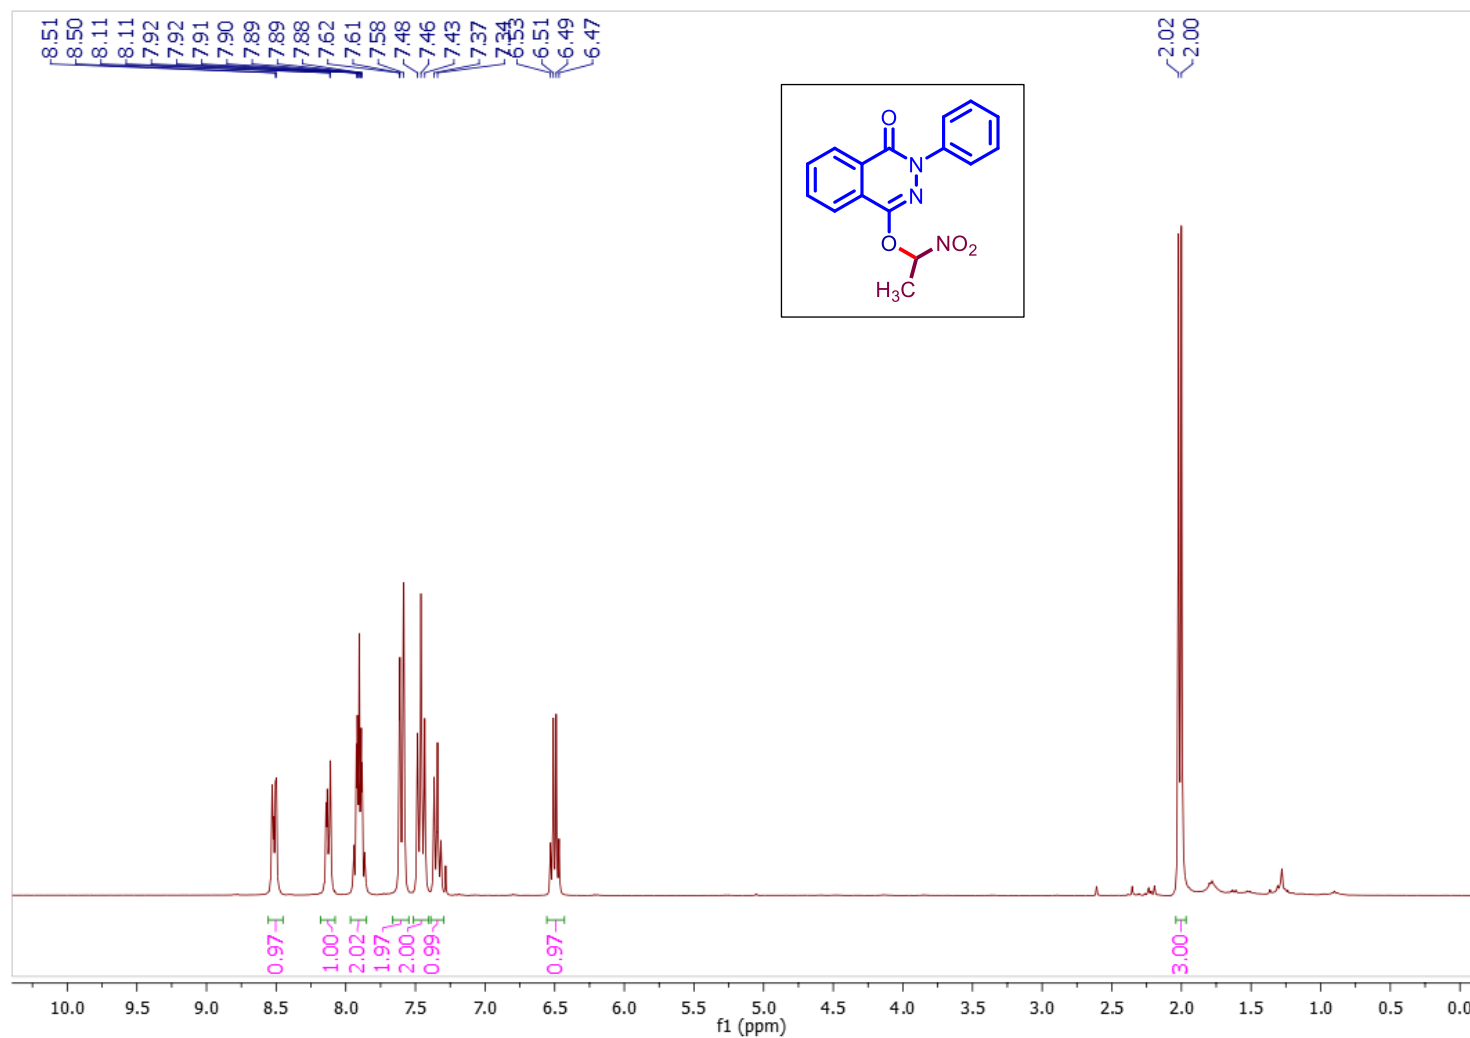

4-(1-nitroethoxy)-2-phenylphthalazin-1(2H)-one (3aq):  $^{13}\text{C}$  NMR (75 MHz,  $\text{CDCl}_3$ ):

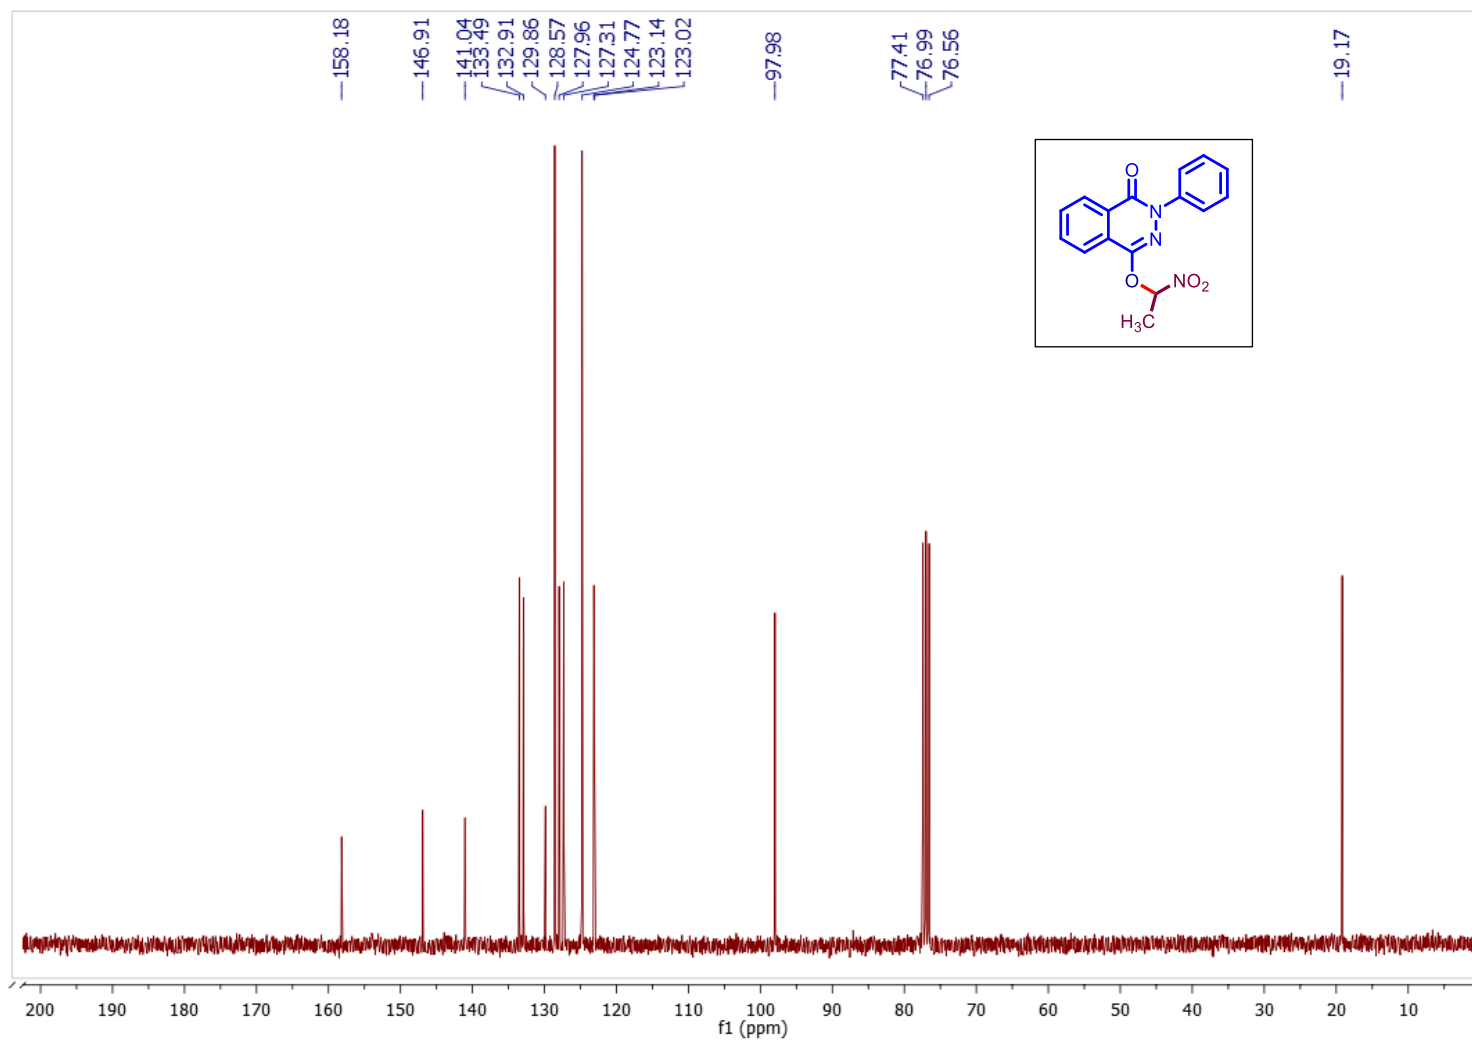

**2-((5-bromopyridin-2-yl)oxy)-1,3-diphenylpropane-1,3-dione (3ar): <sup>1</sup>H NMR (300 MHz, CDCl<sub>3</sub>):**

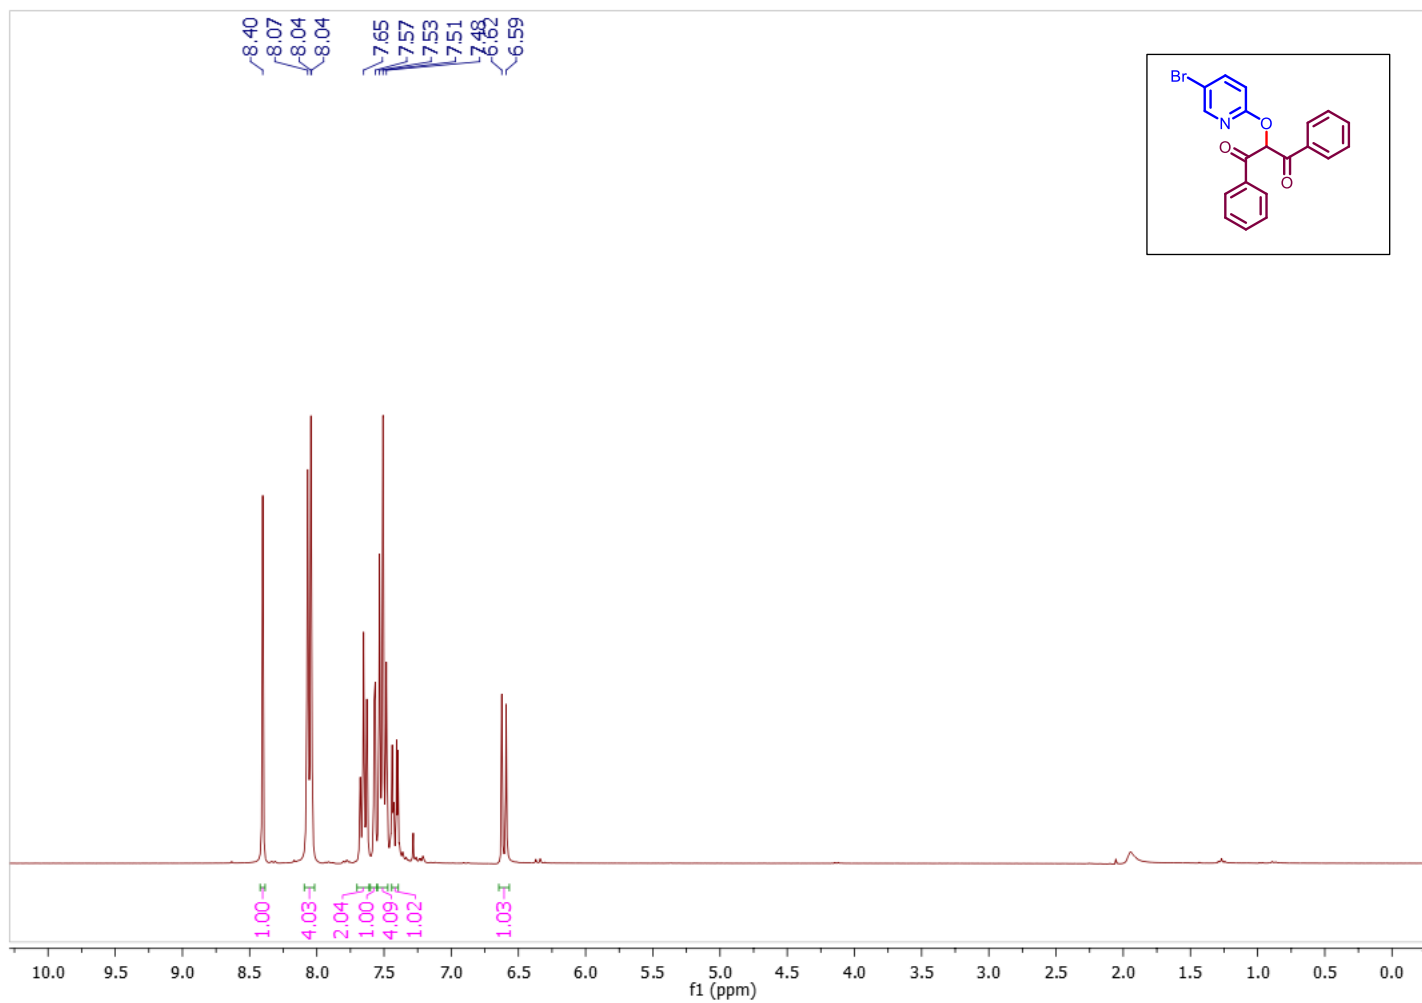

2-((5-bromopyridin-2-yl)oxy)-1,3-diphenylpropane-1,3-dione (3ar):  $^{13}\text{C}$  NMR (75 MHz,  $\text{CDCl}_3$ ):

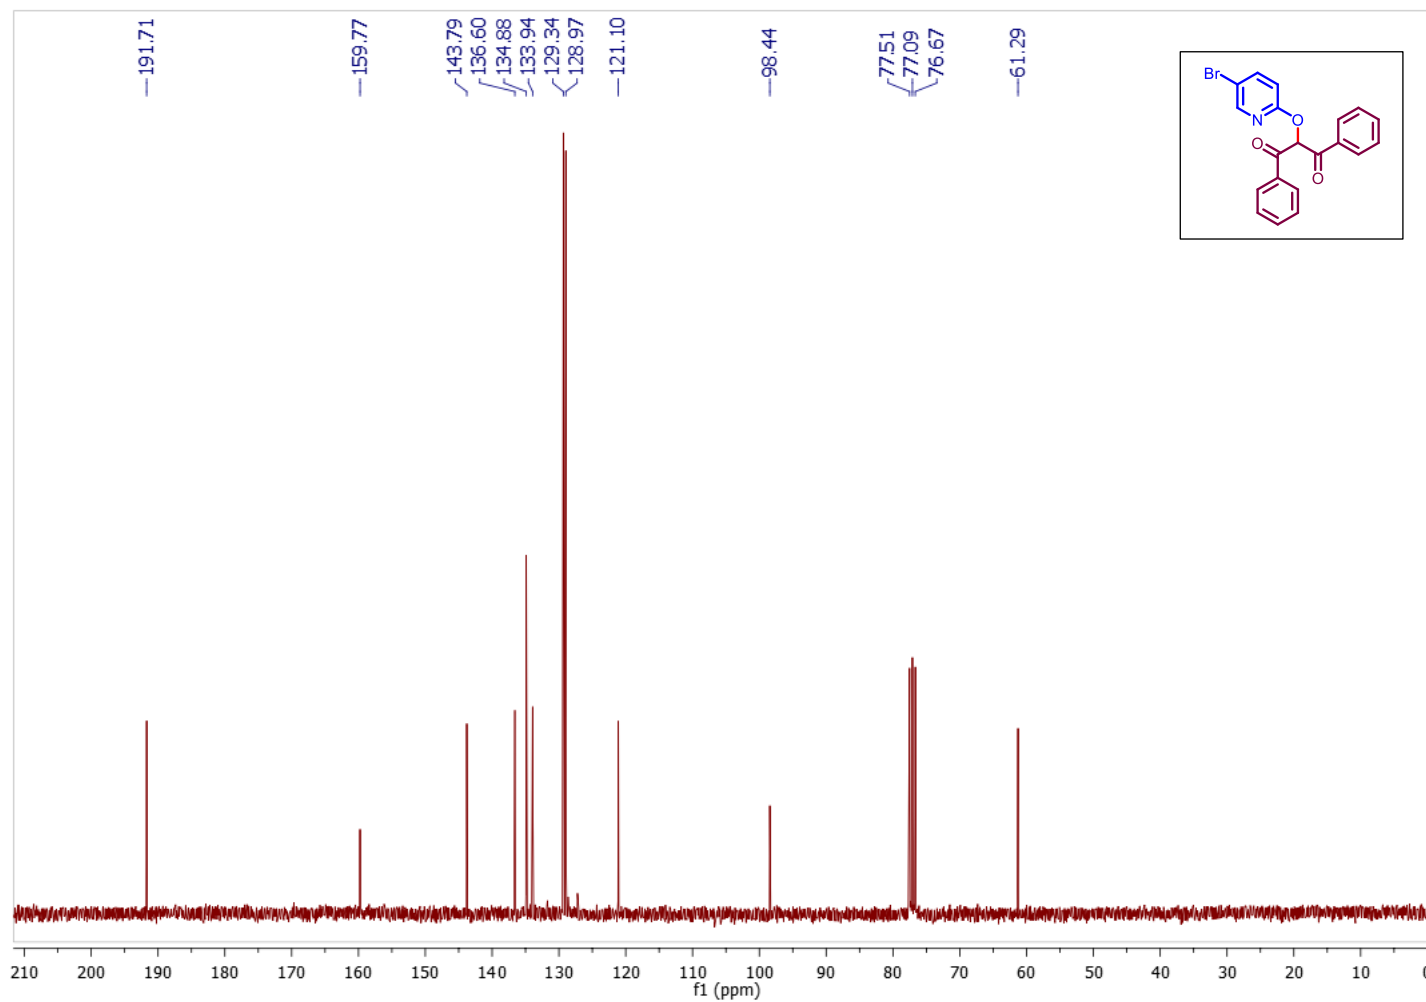

**2-((5-bromopyridin-2-yl)oxy)-1-phenylpropan-1-one (3as): <sup>1</sup>H NMR (300 MHz, CDCl<sub>3</sub>):**

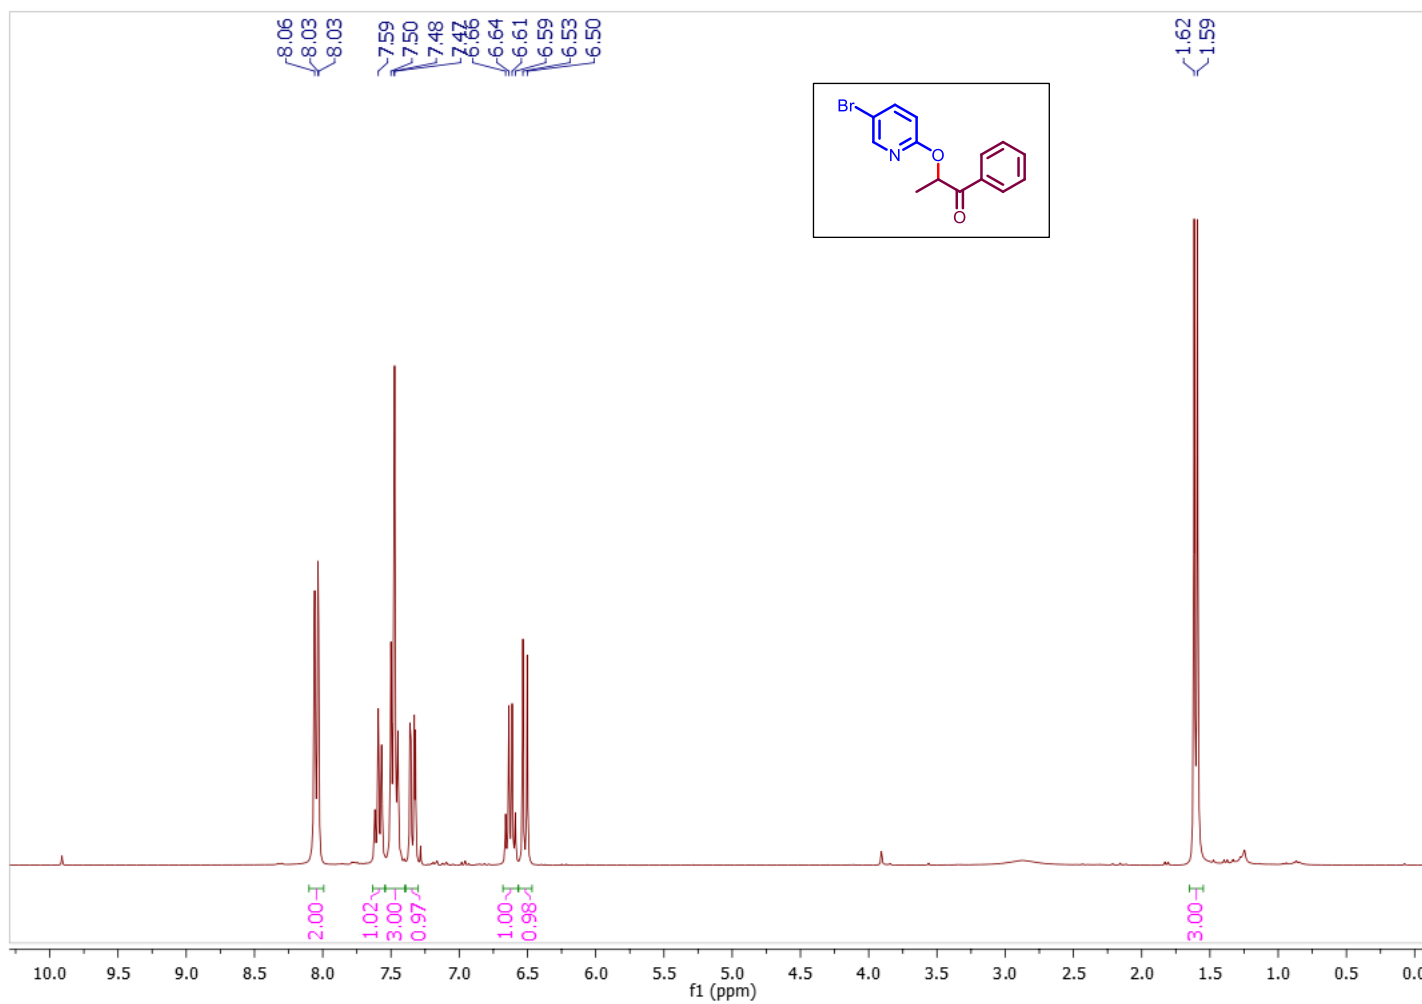

2-((5-bromopyridin-2-yl)oxy)-1-phenylpropan-1-one (3as):  $^{13}\text{C}$  NMR (75 MHz,  $\text{CDCl}_3$ ):

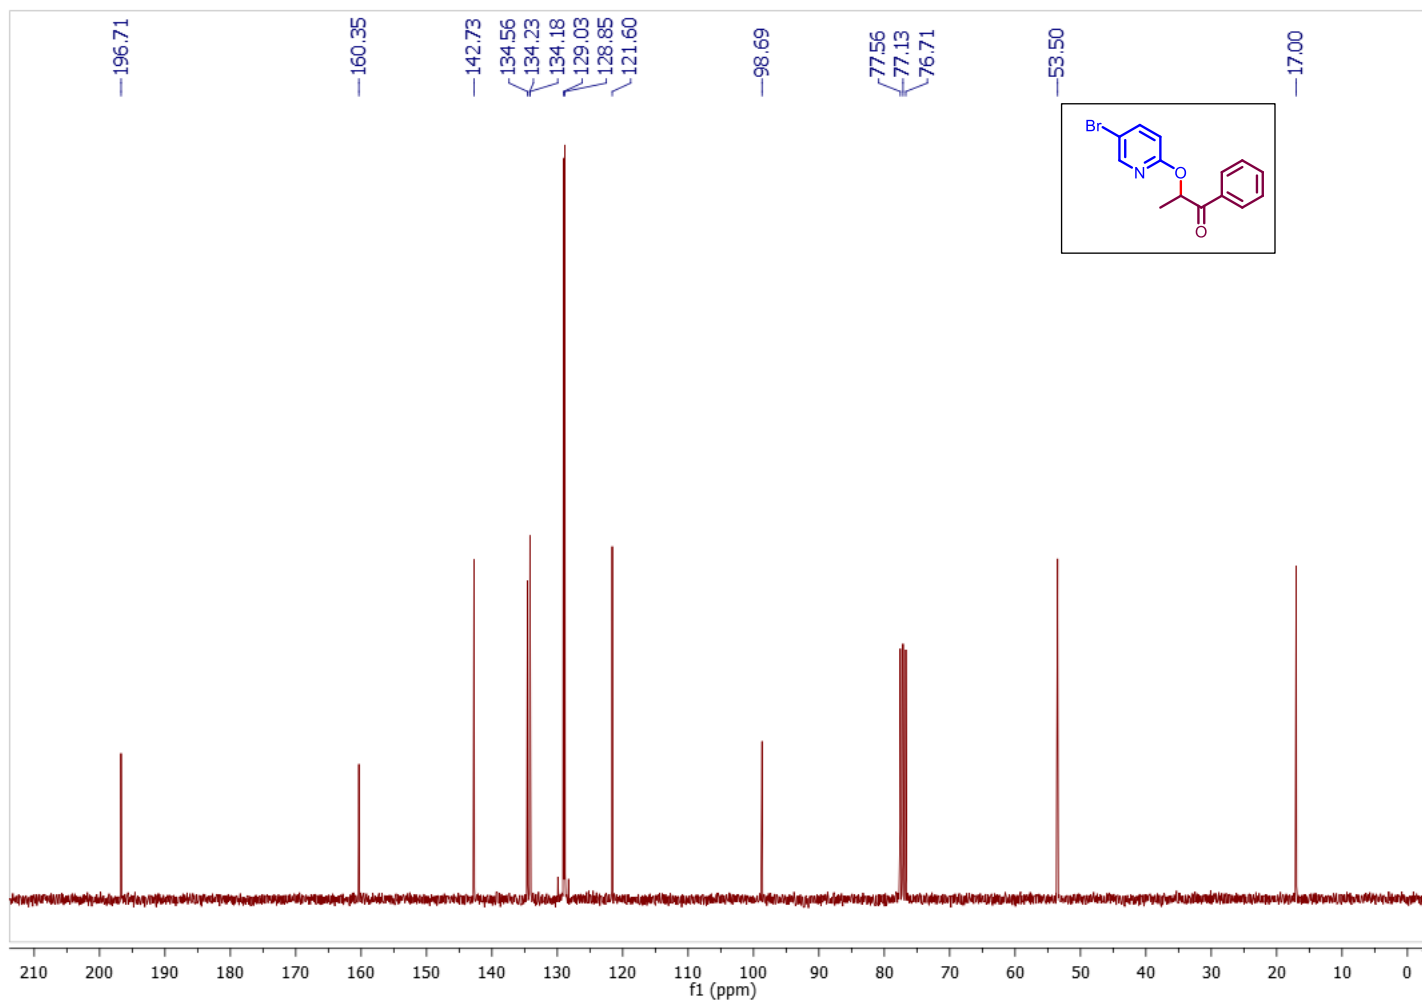



**1-phenyl-2-(pyrimidin-4-yloxy)ethan-1-one (3at):  $^1\text{H}$  NMR (300 MHz,  $\text{CDCl}_3$ ):**

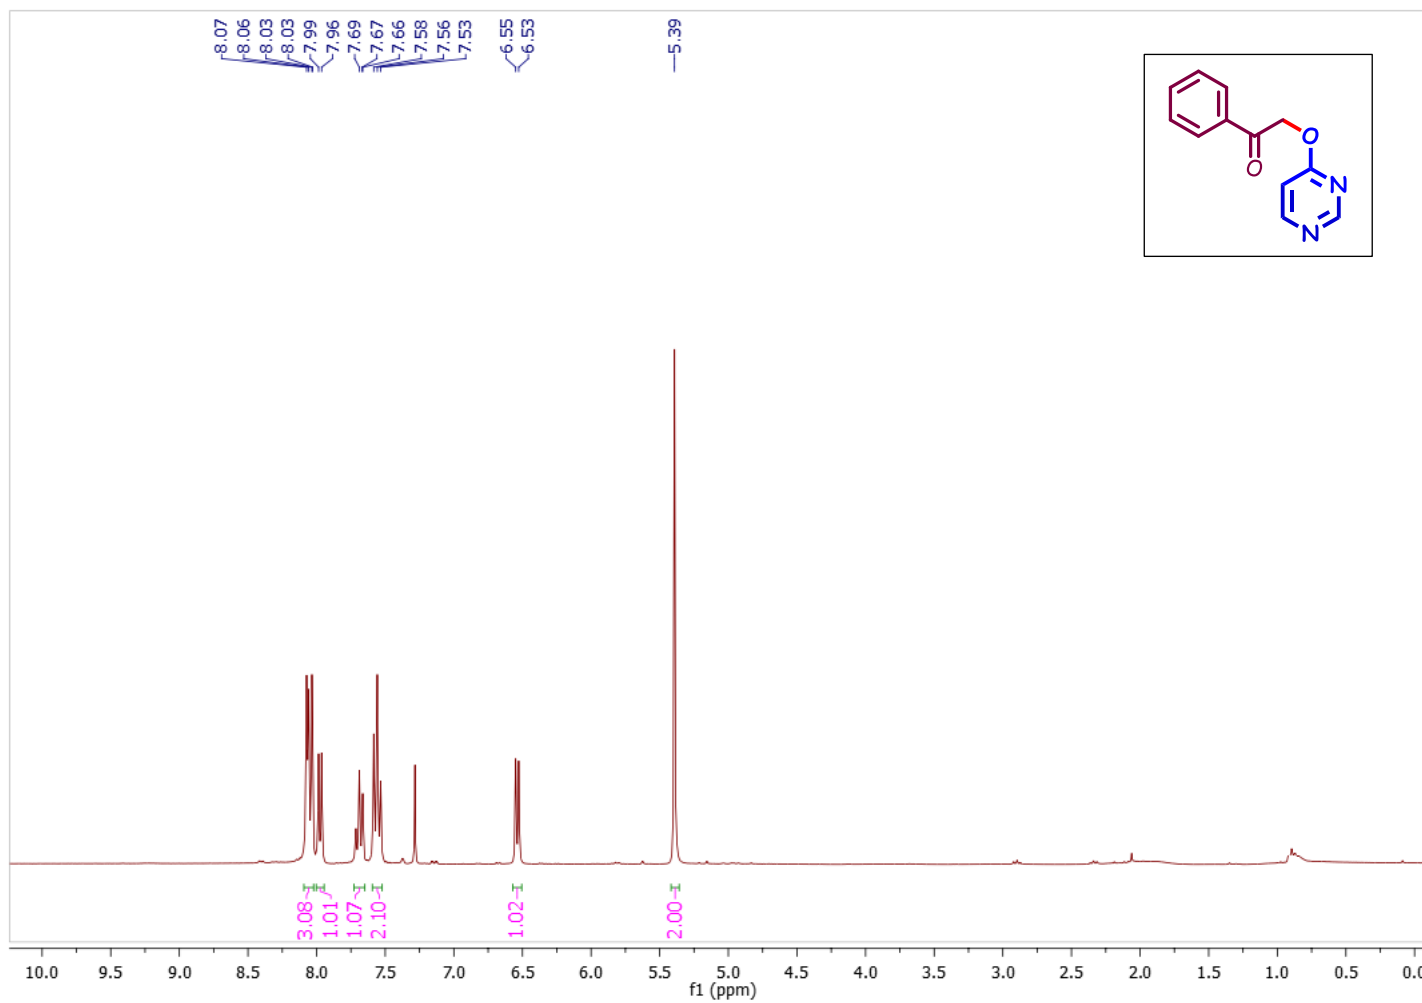

1-phenyl-2-(pyrimidin-4-yloxy)ethan-1-one (3at):  $^{13}\text{C}$  NMR (75 MHz,  $\text{CDCl}_3$ ):

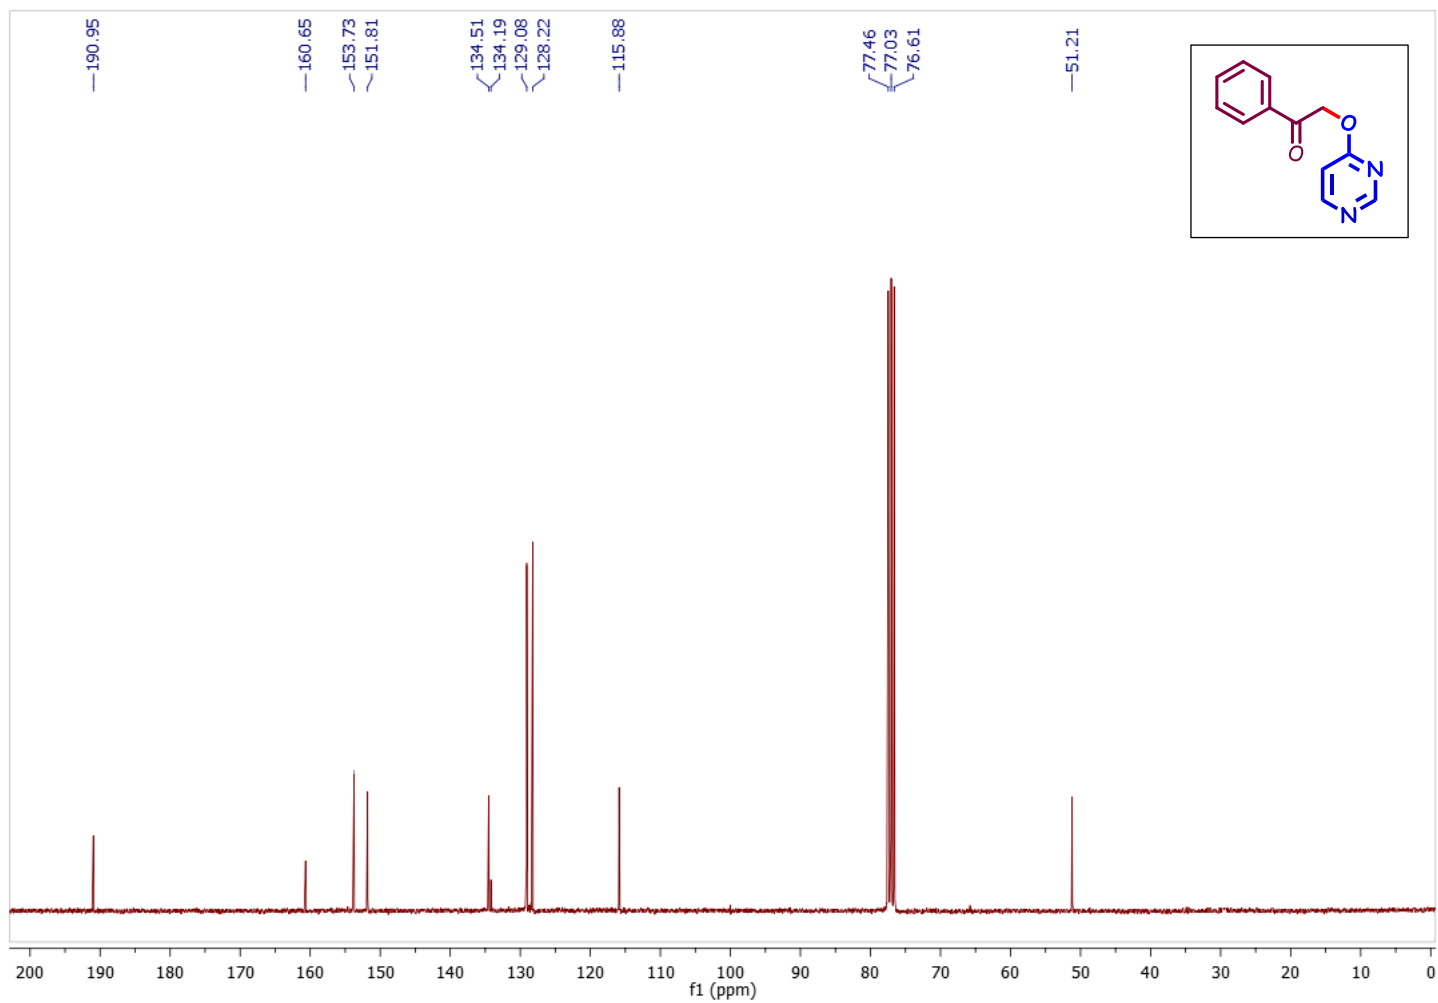

1-(2,4-dichlorophenyl)-2-(pyrimidin-4-yloxy)ethan-1-one (3au): <sup>1</sup>H NMR (300 MHz, CDCl<sub>3</sub>):

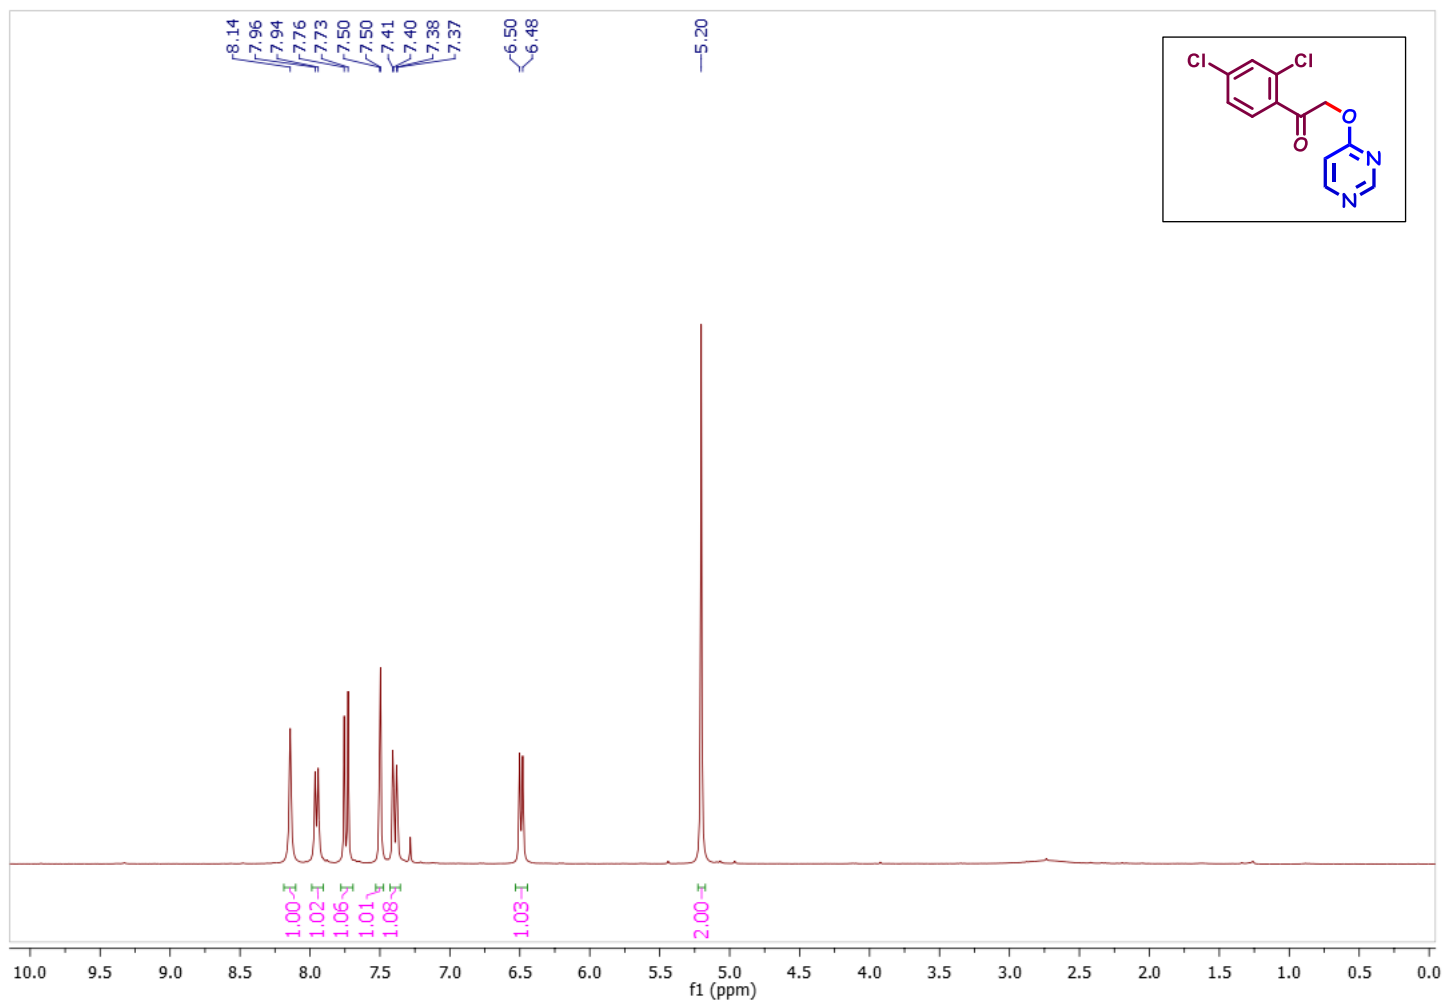

1-(2,4-dichlorophenyl)-2-(pyrimidin-4-yloxy)ethan-1-one (3au):  $^{13}\text{C}$  NMR (75 MHz,  $\text{CDCl}_3$ ):

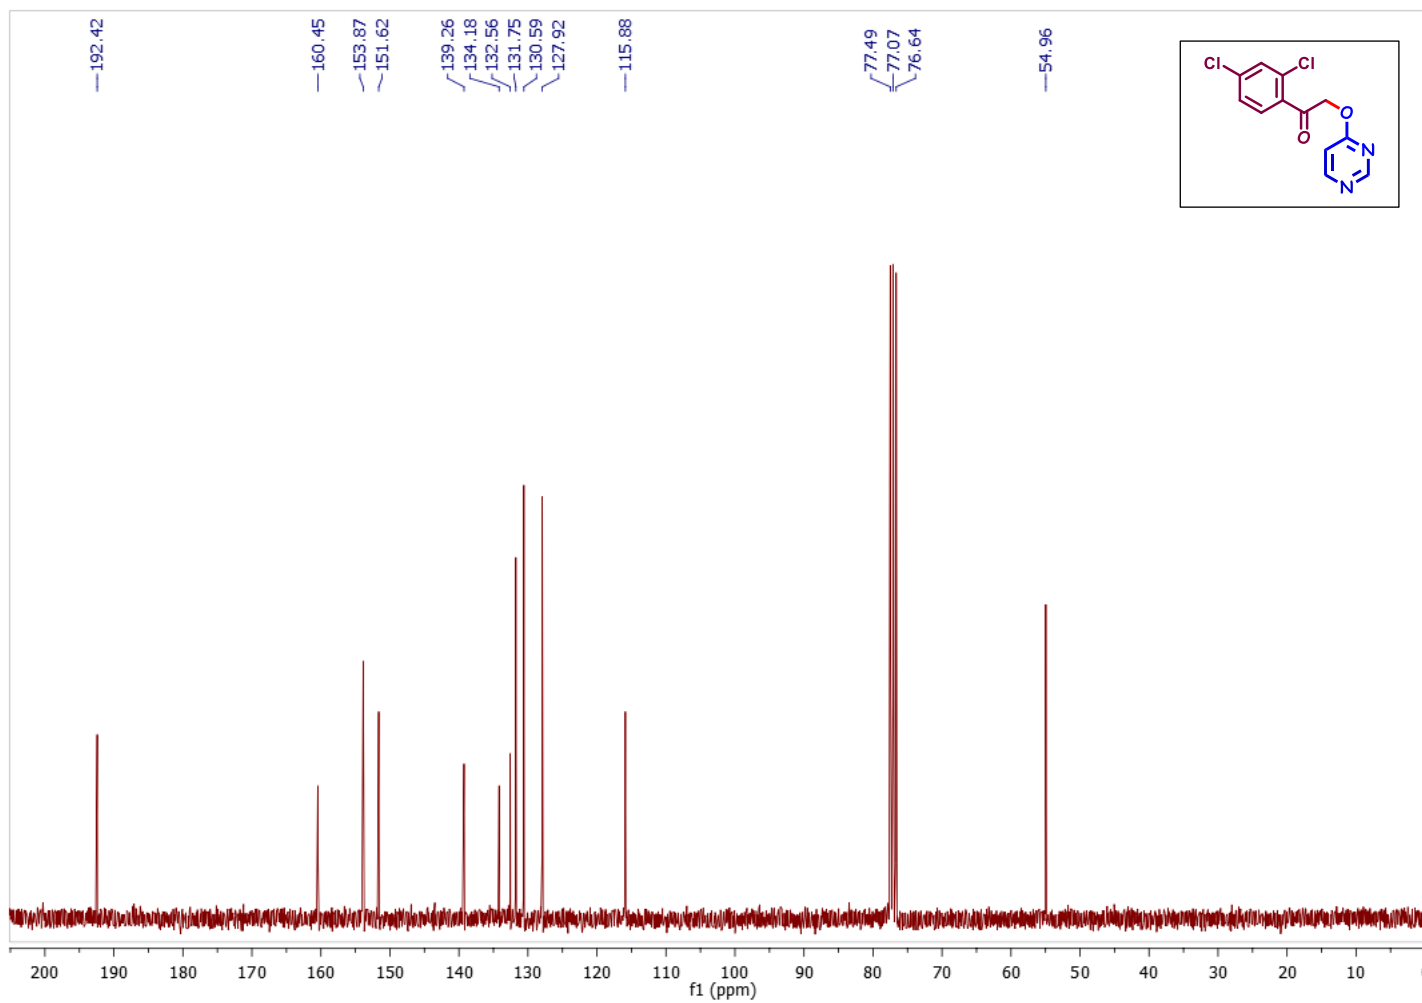

1-(4-bromophenyl)-2-(pyrimidin-4-yloxy)ethan-1-one (3av):  $^1\text{H}$  NMR (300 MHz,  $\text{CDCl}_3$ ):

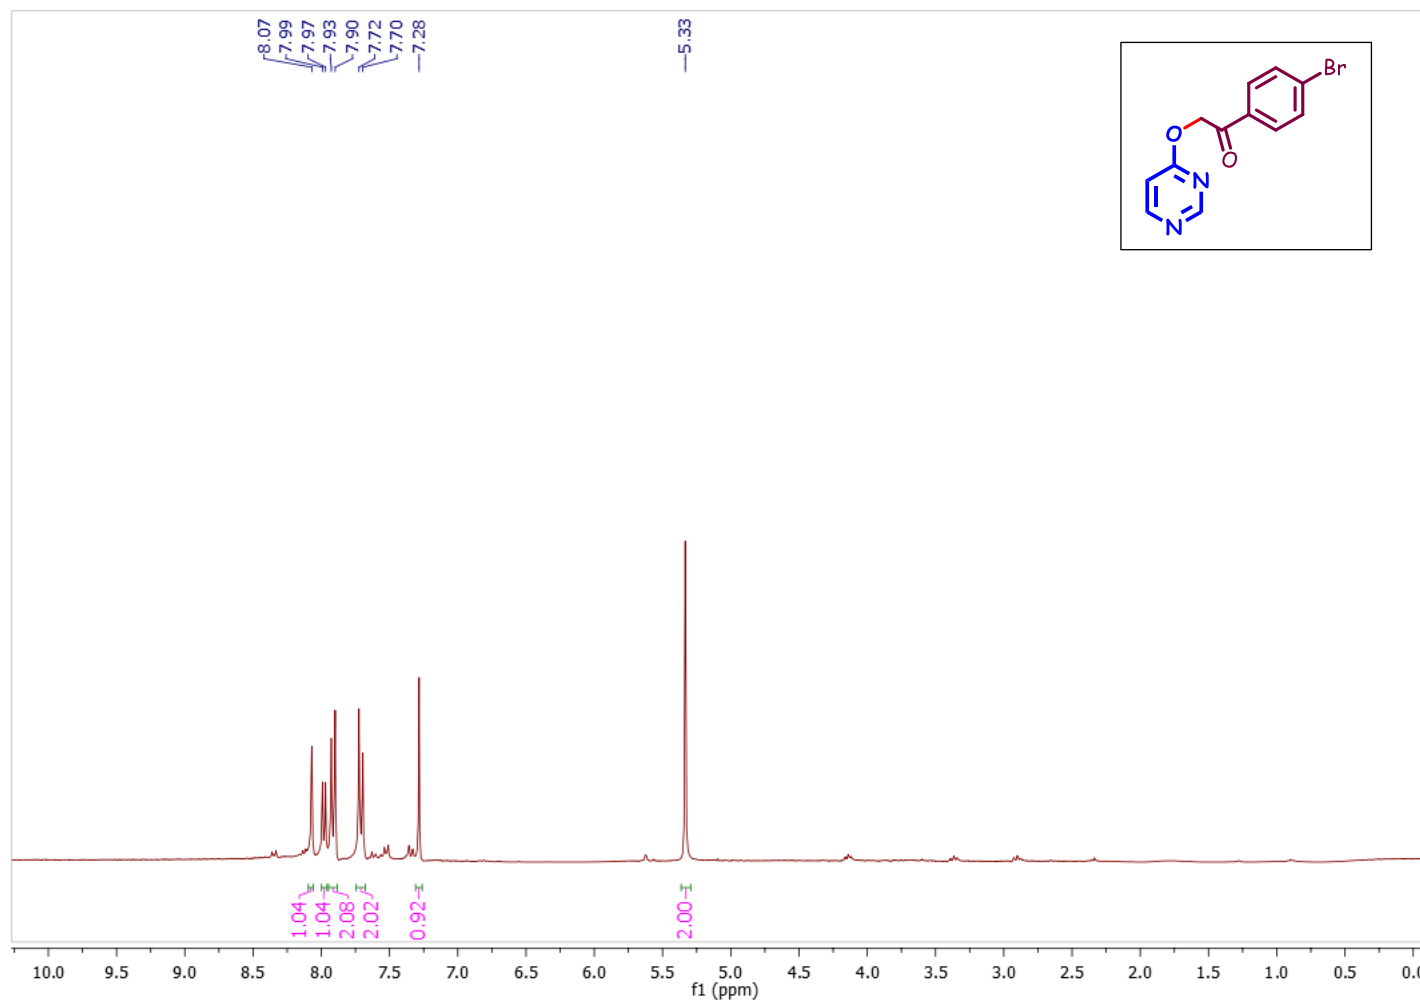

1-(4-bromophenyl)-2-(pyrimidin-4-yloxy)ethan-1-one (3av):  $^{13}\text{C}$  NMR (75 MHz,  $\text{CDCl}_3$ ):

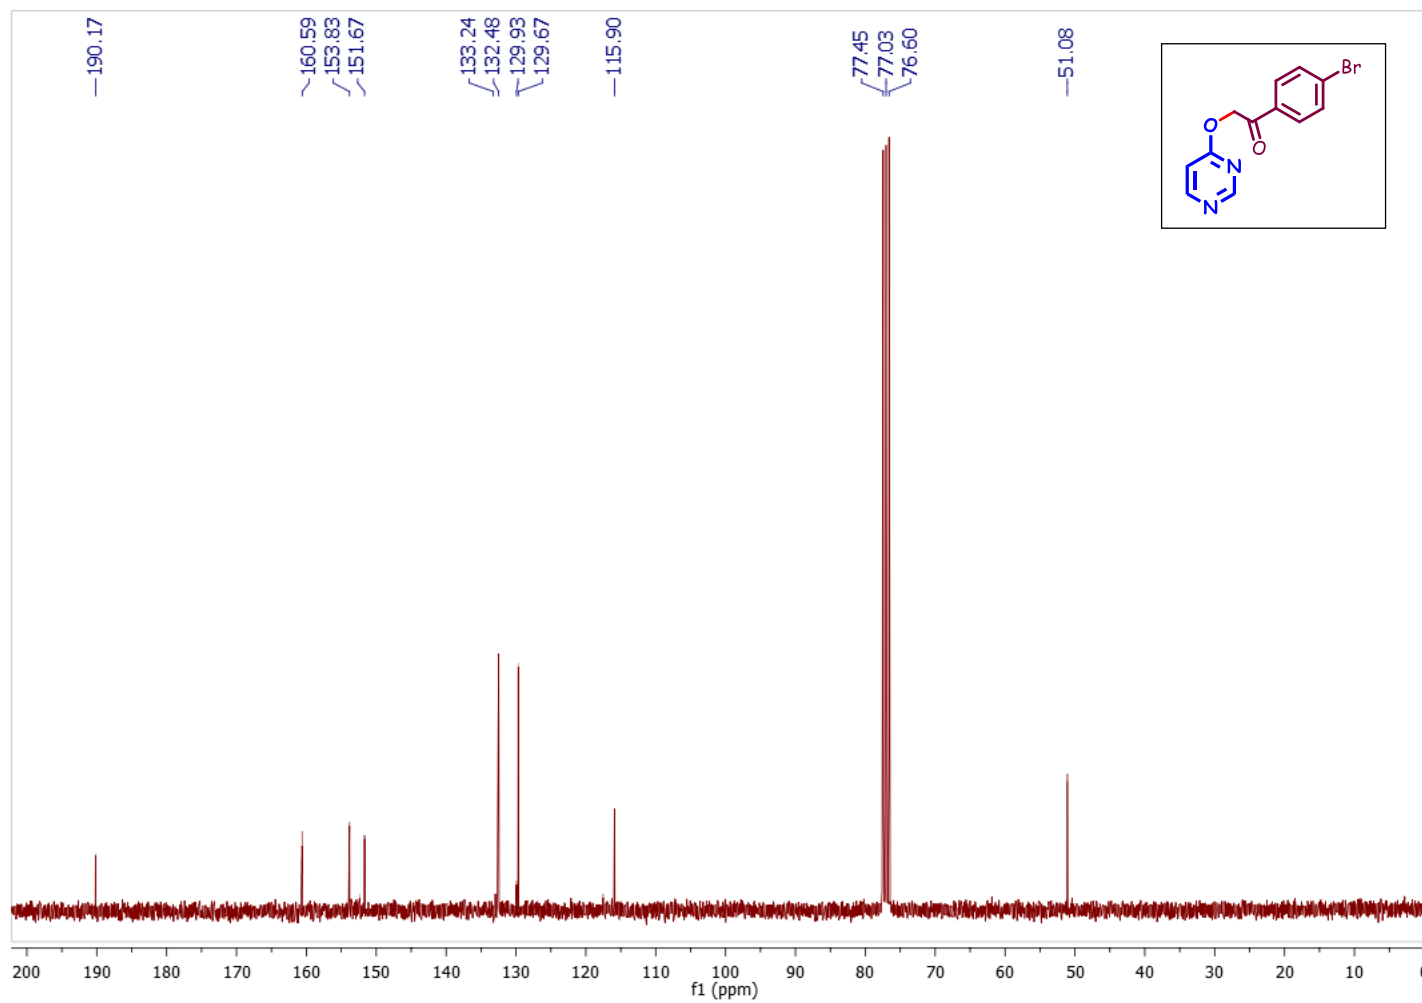

**1-(4-bromophenyl)-2-((3-phenylquinoxalin-2-yl)oxy)ethan-1-one (3aw): <sup>1</sup>H NMR (300 MHz, DMSO-d<sub>6</sub>):**

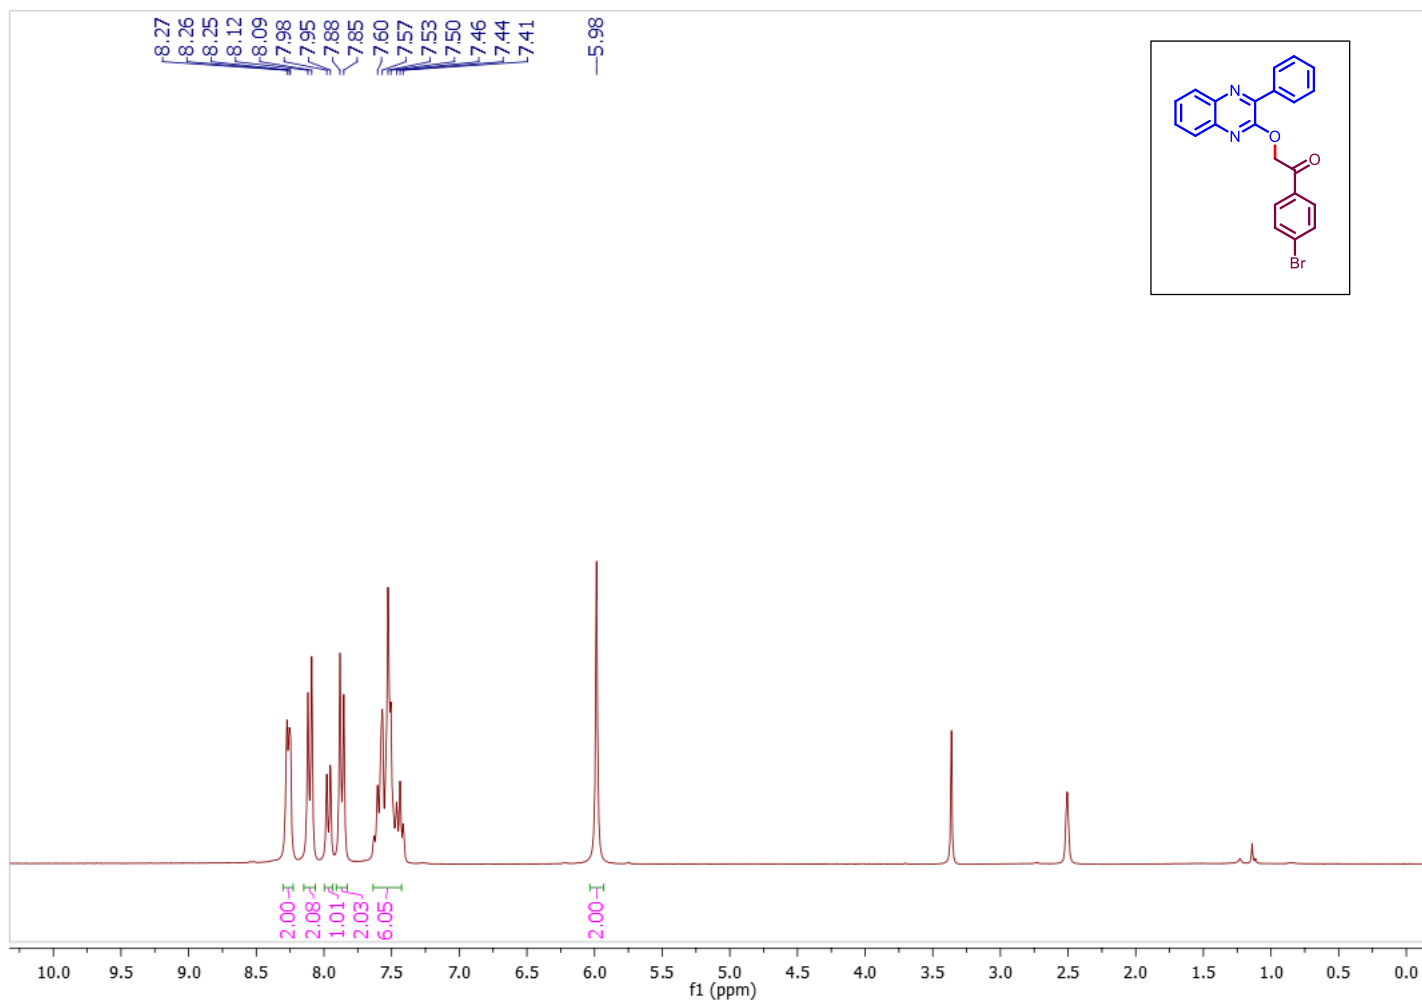

**1-(4-bromophenyl)-2-((3-phenylquinoxalin-2-yl)oxy)ethan-1-one (3aw):  $^{13}\text{C}$  NMR (75 MHz,  $\text{DMSO-}d_6$ ):**

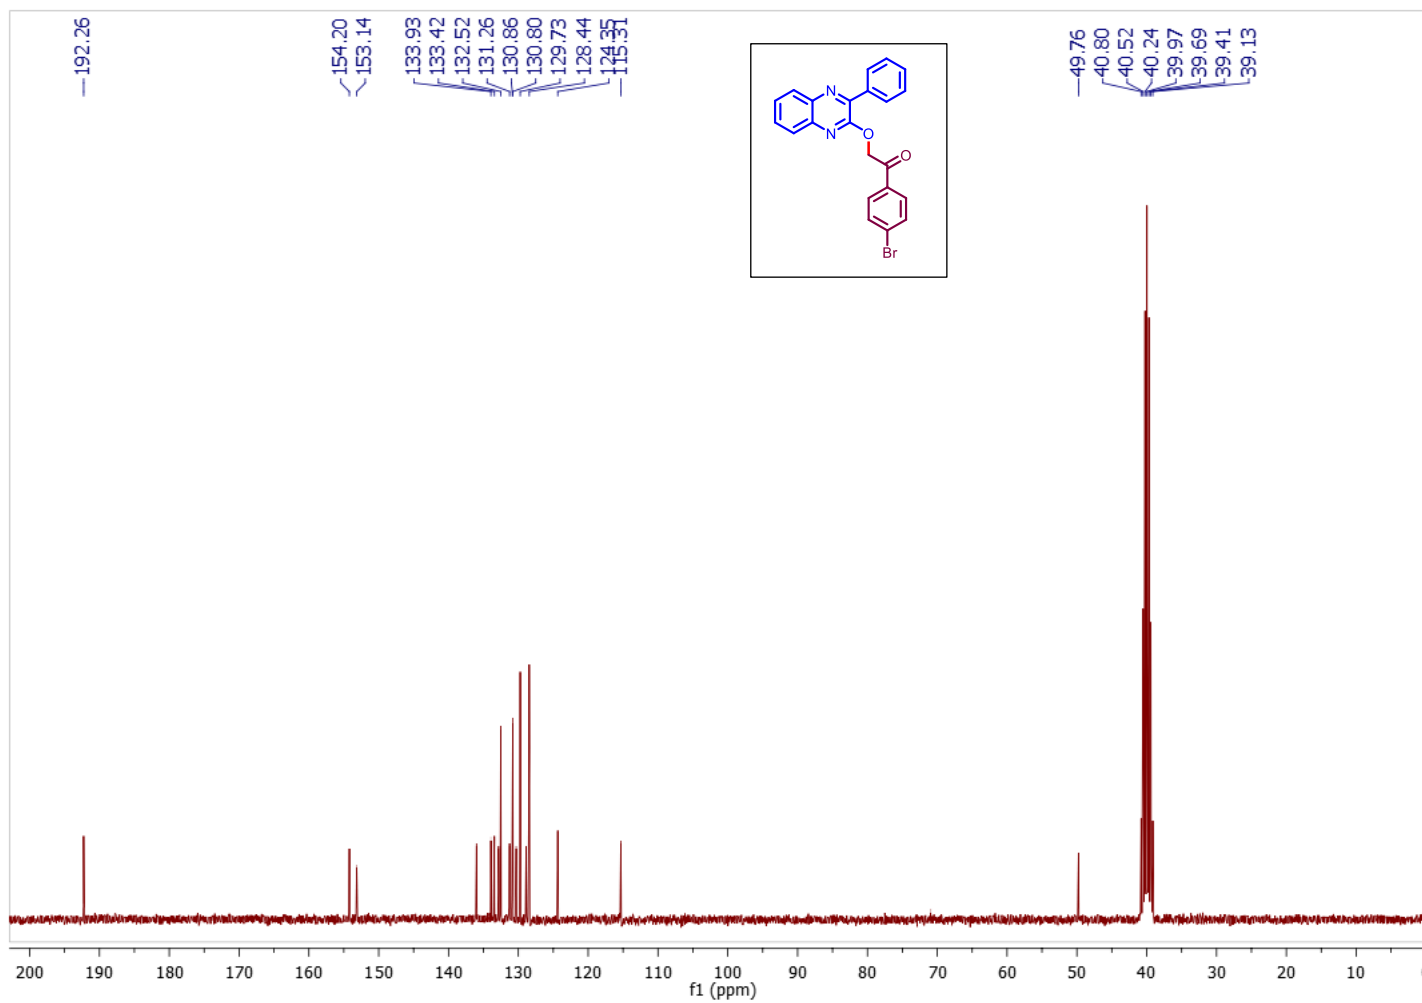



2-phenylisoindoline-1,3-dione(4a):  $^1\text{H}$  NMR (300 MHz,  $\text{CDCl}_3$ ):

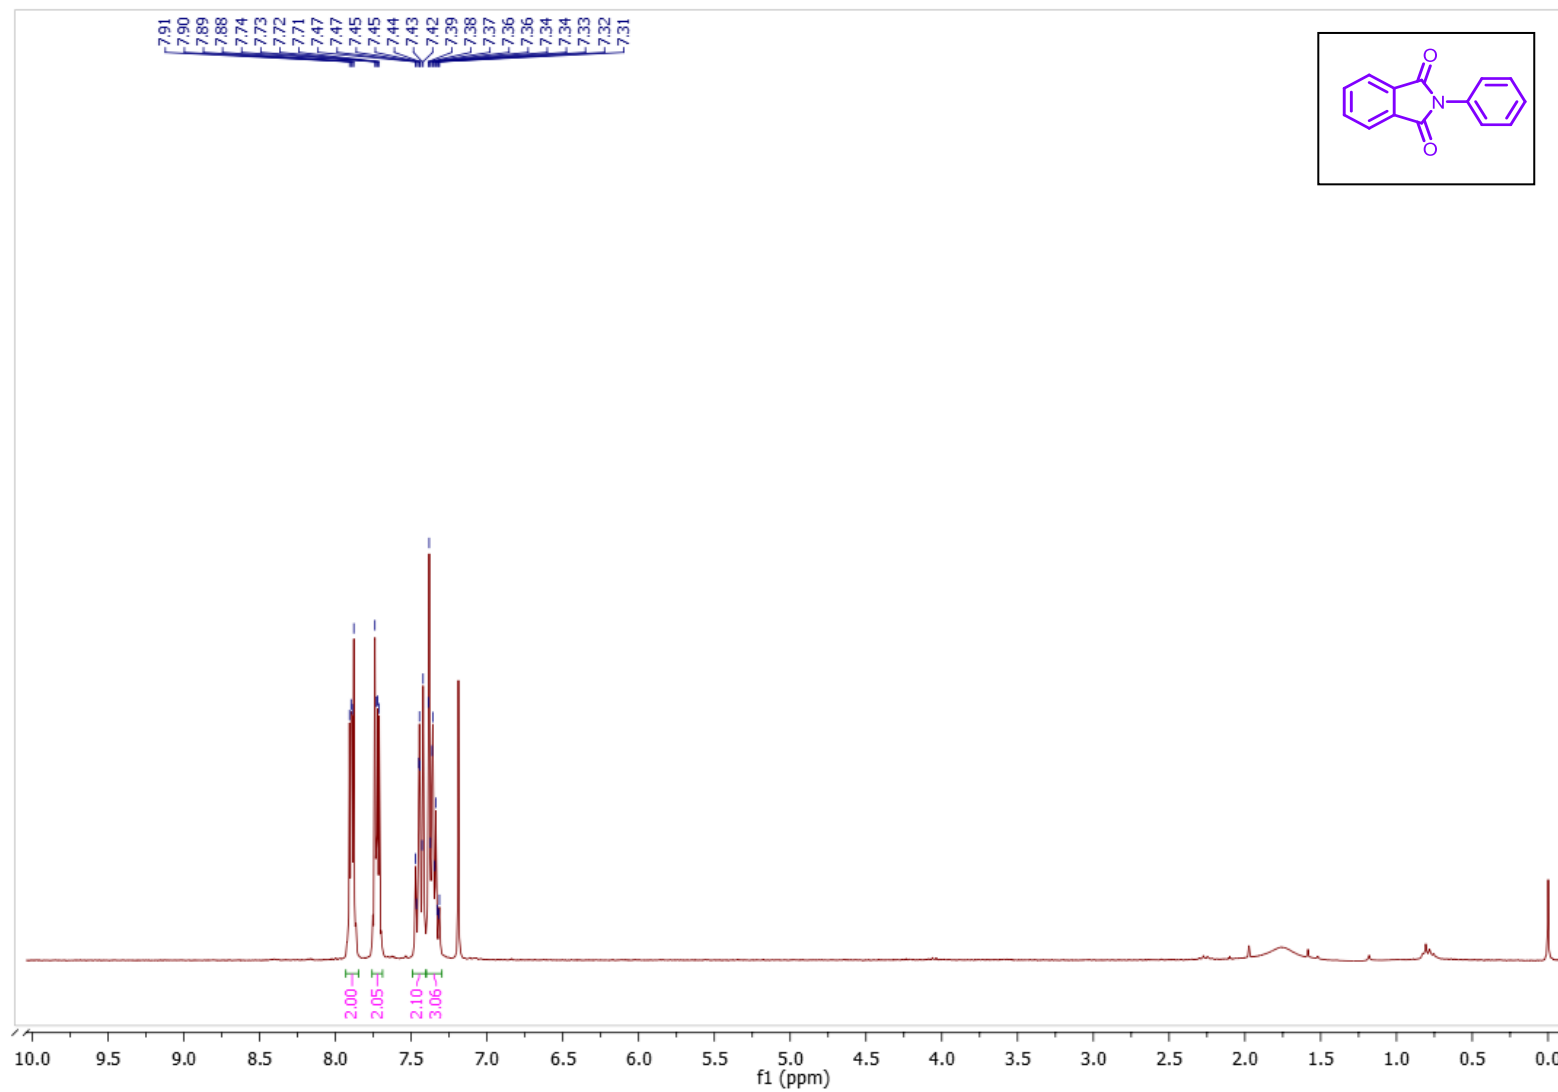

2-phenylisoindoline-1,3-dione(4a):  $^{13}\text{C}$  NMR (75 MHz,  $\text{CDCl}_3$ ):

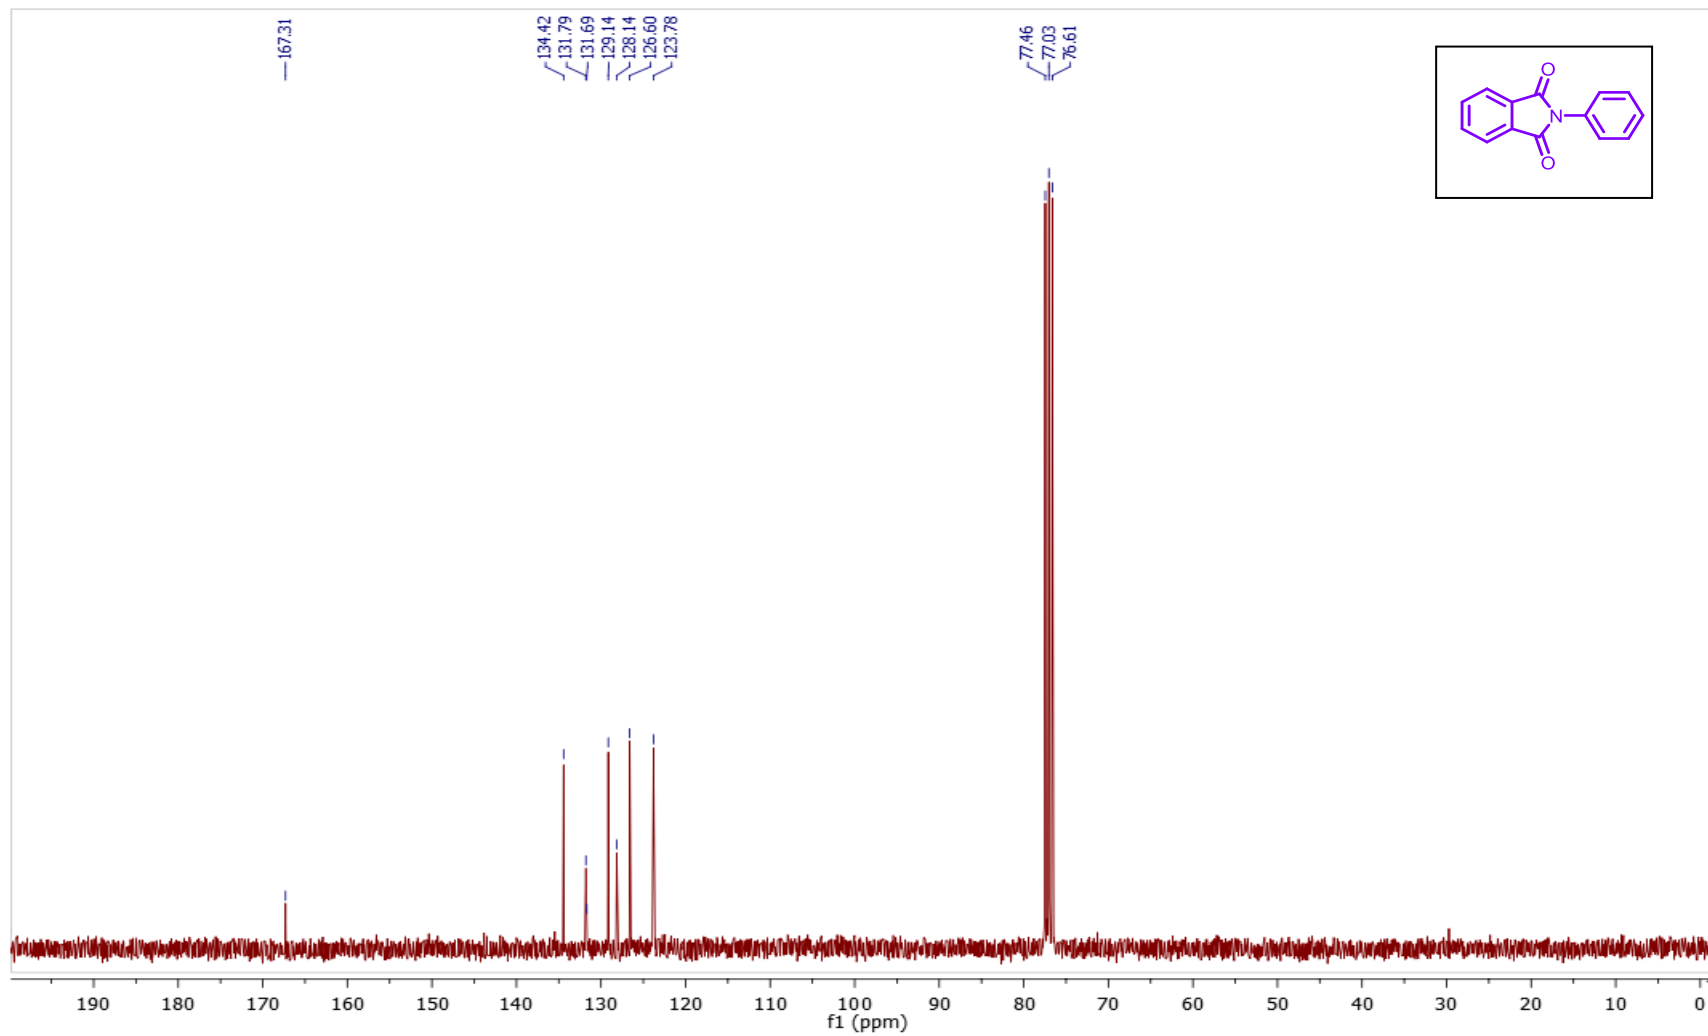

**2-(p-tolyl)isoindoline-1,3-dione(4b): <sup>1</sup>H NMR (400 MHz, CDCl<sub>3</sub>):**

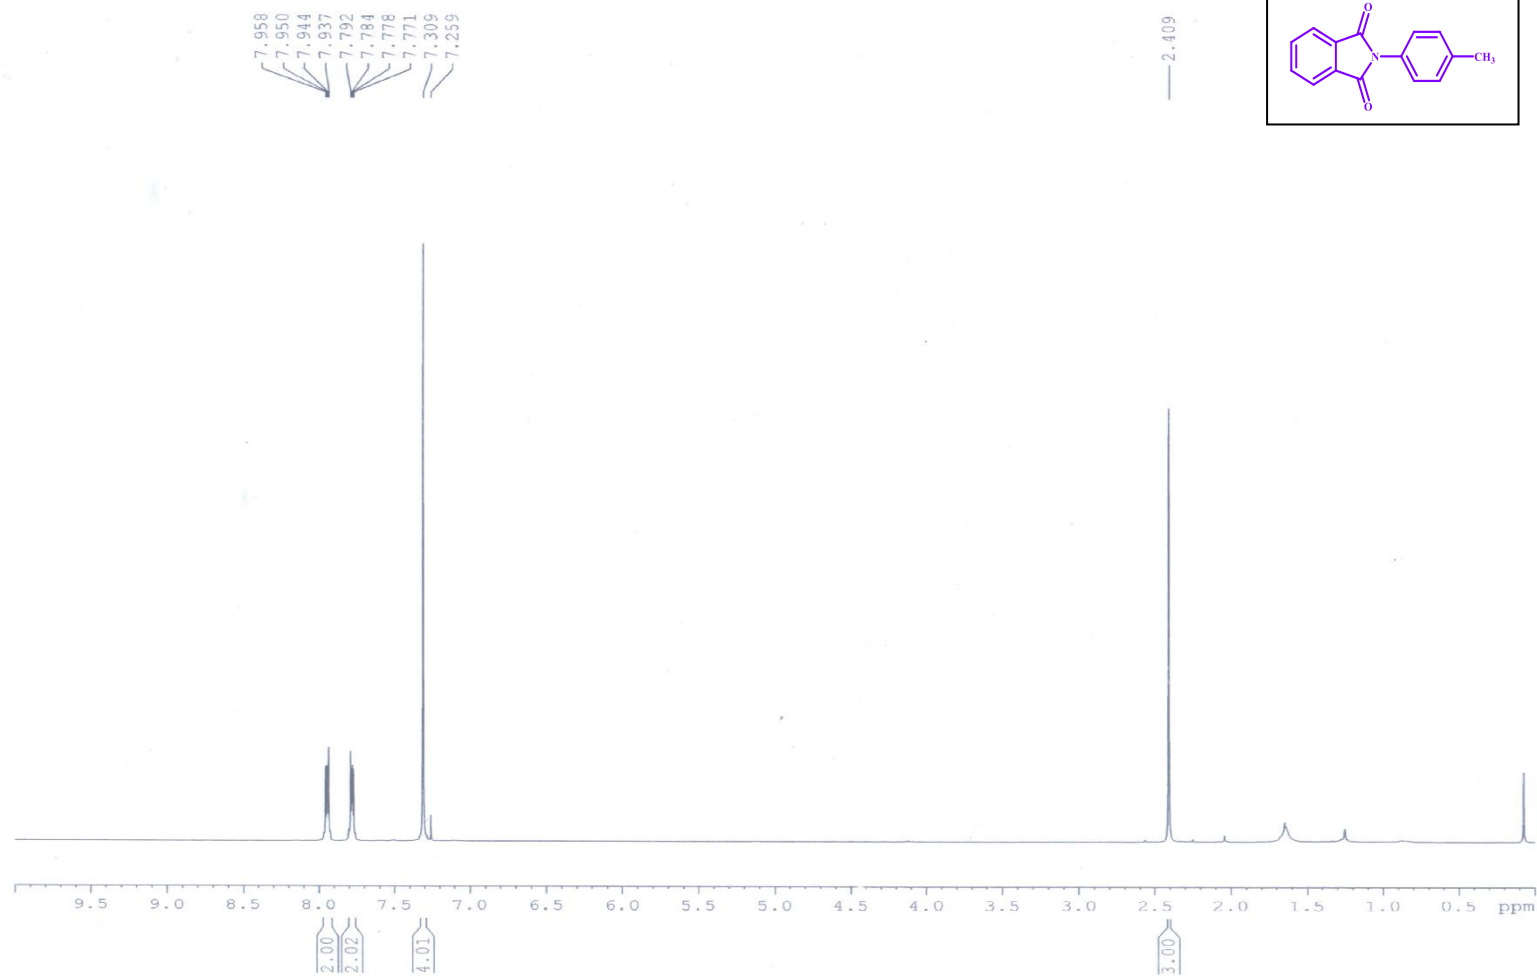

**2-(p-tolyl)isoindoline-1,3-dione(4b):  $^{13}\text{C}$  NMR (100 MHz,  $\text{CDCl}_3$ ):**

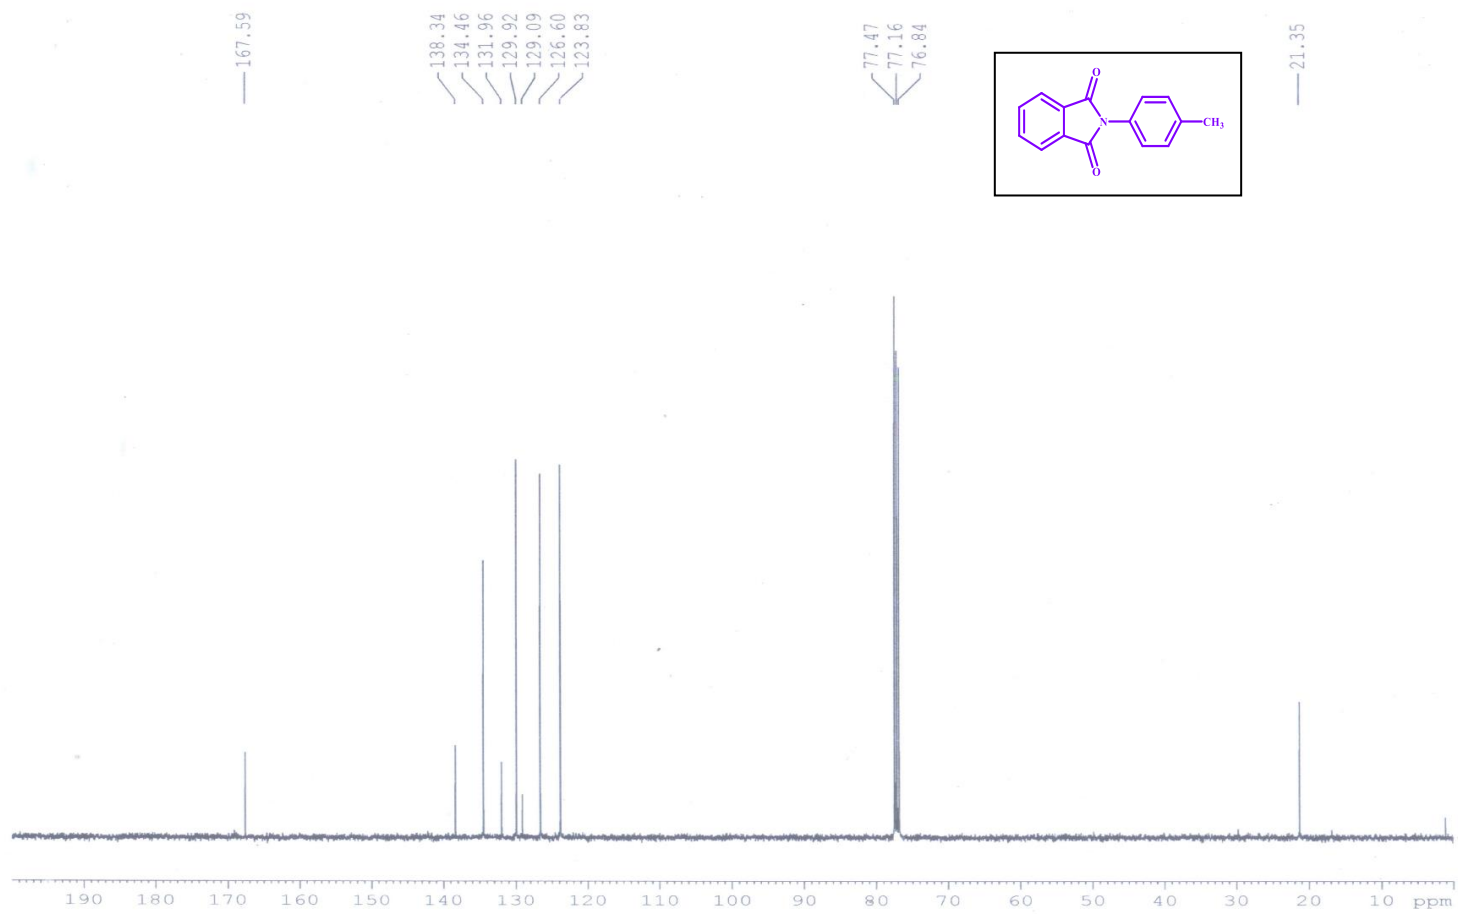

2-(2,3-dimethylphenyl)isoindoline-1,3-dione (4c):  $^1\text{H}$  NMR (300 MHz,  $\text{CDCl}_3$ ):

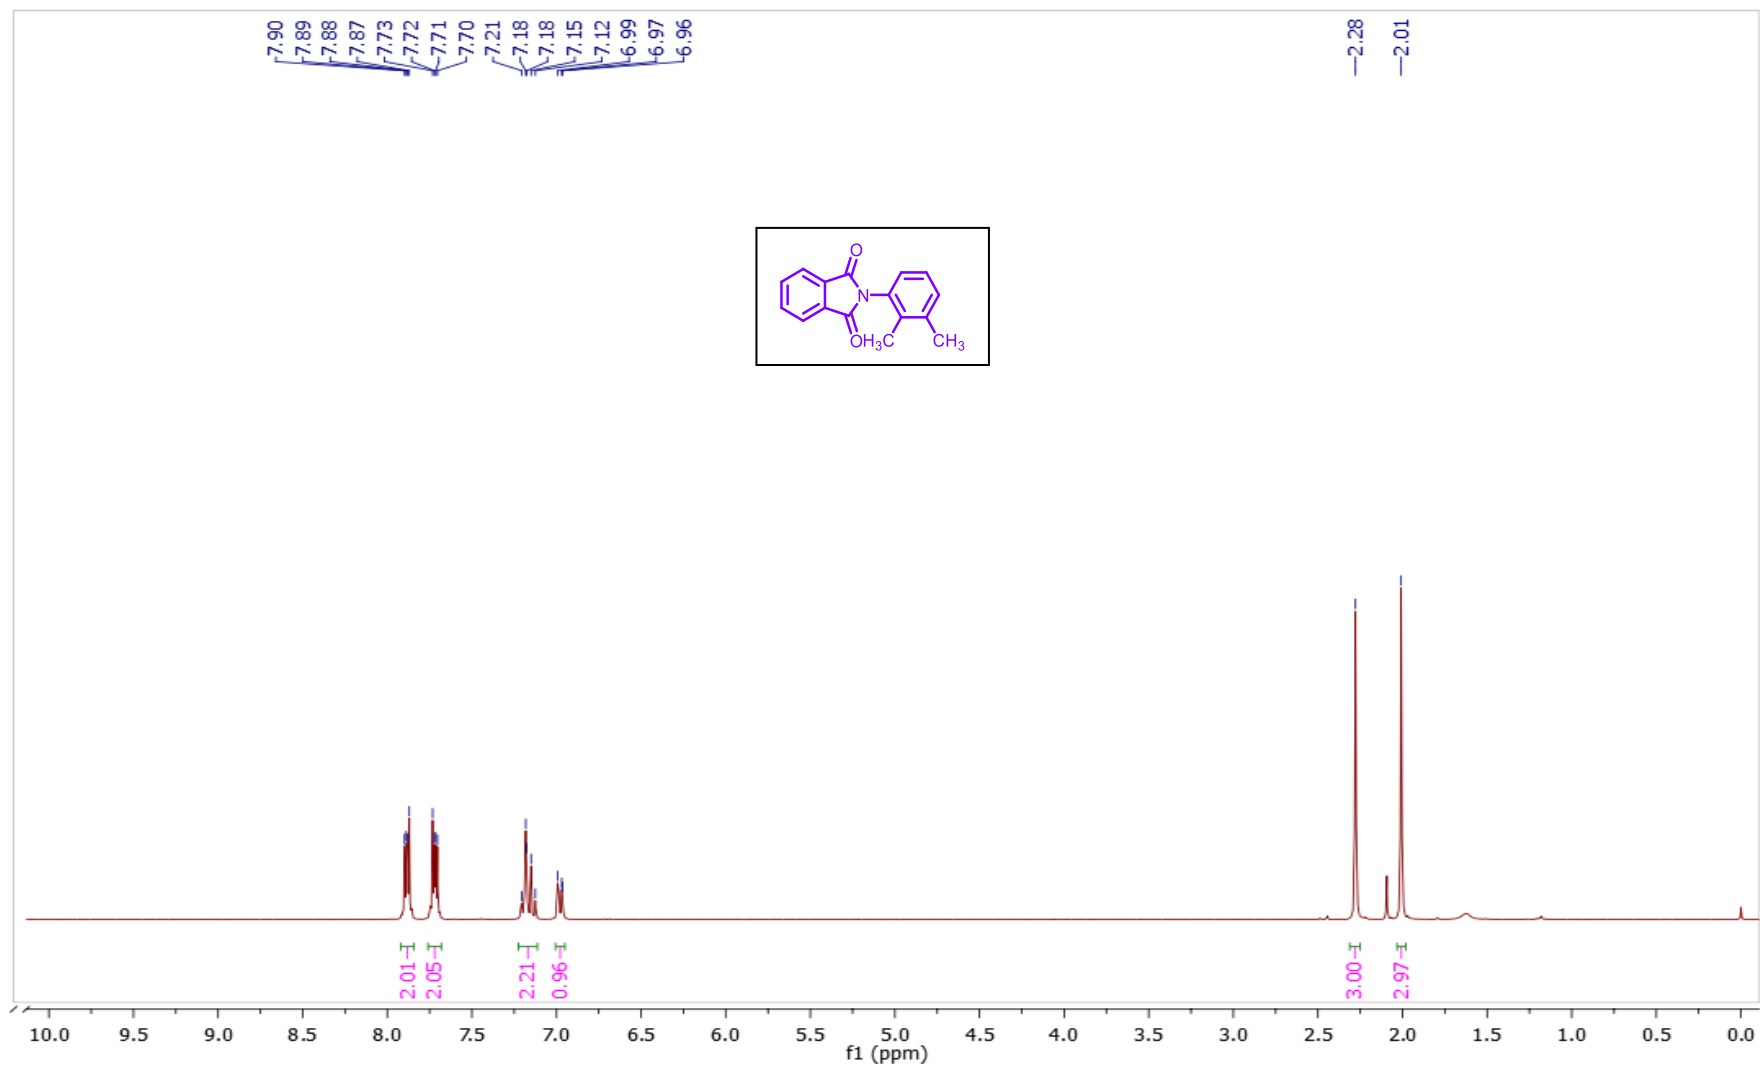

**2-(2,3-dimethylphenyl)isoindoline-1,3-dione (4c):  $^{13}\text{C}$  NMR (75 MHz,  $\text{CDCl}_3$ ):**

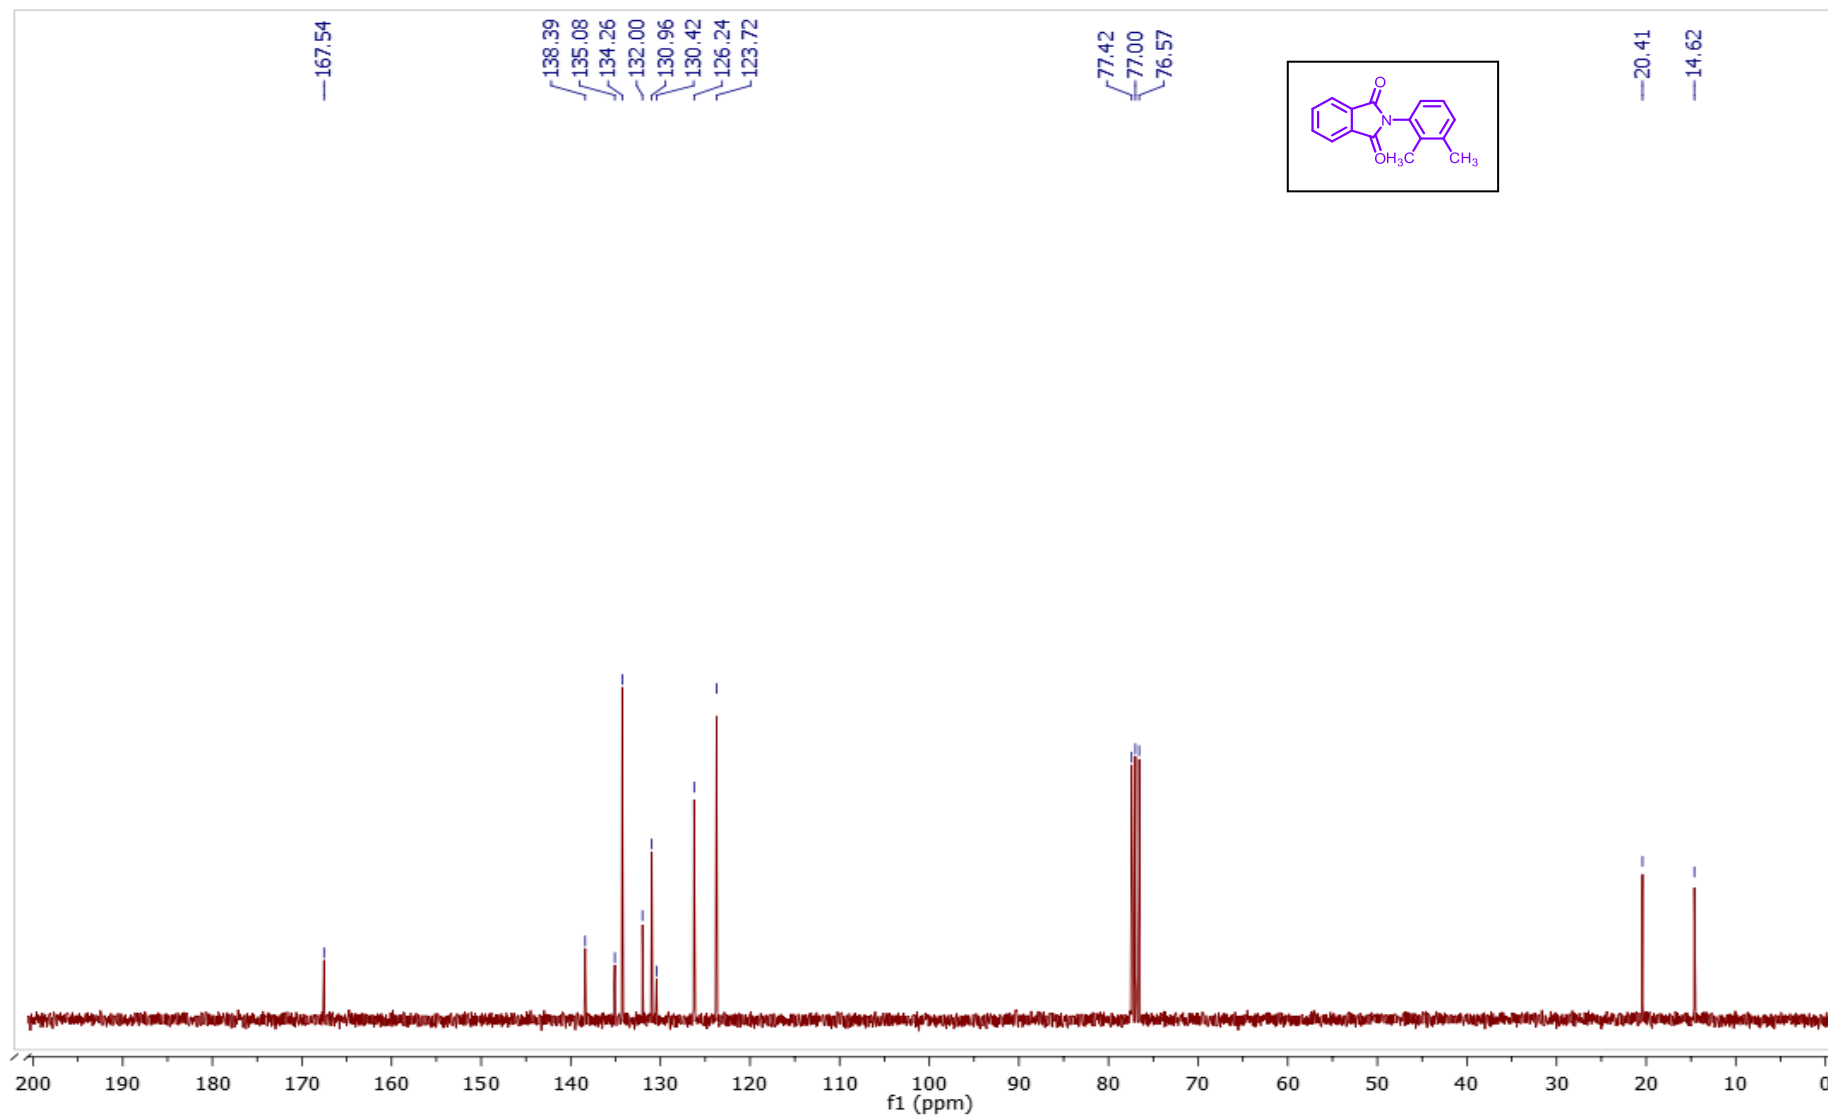

2-(4-(tert-butyl)phenyl)isoindoline-1,3-dione (4d):  $^1\text{H}$  NMR (400 MHz,  $\text{CDCl}_3$ ):

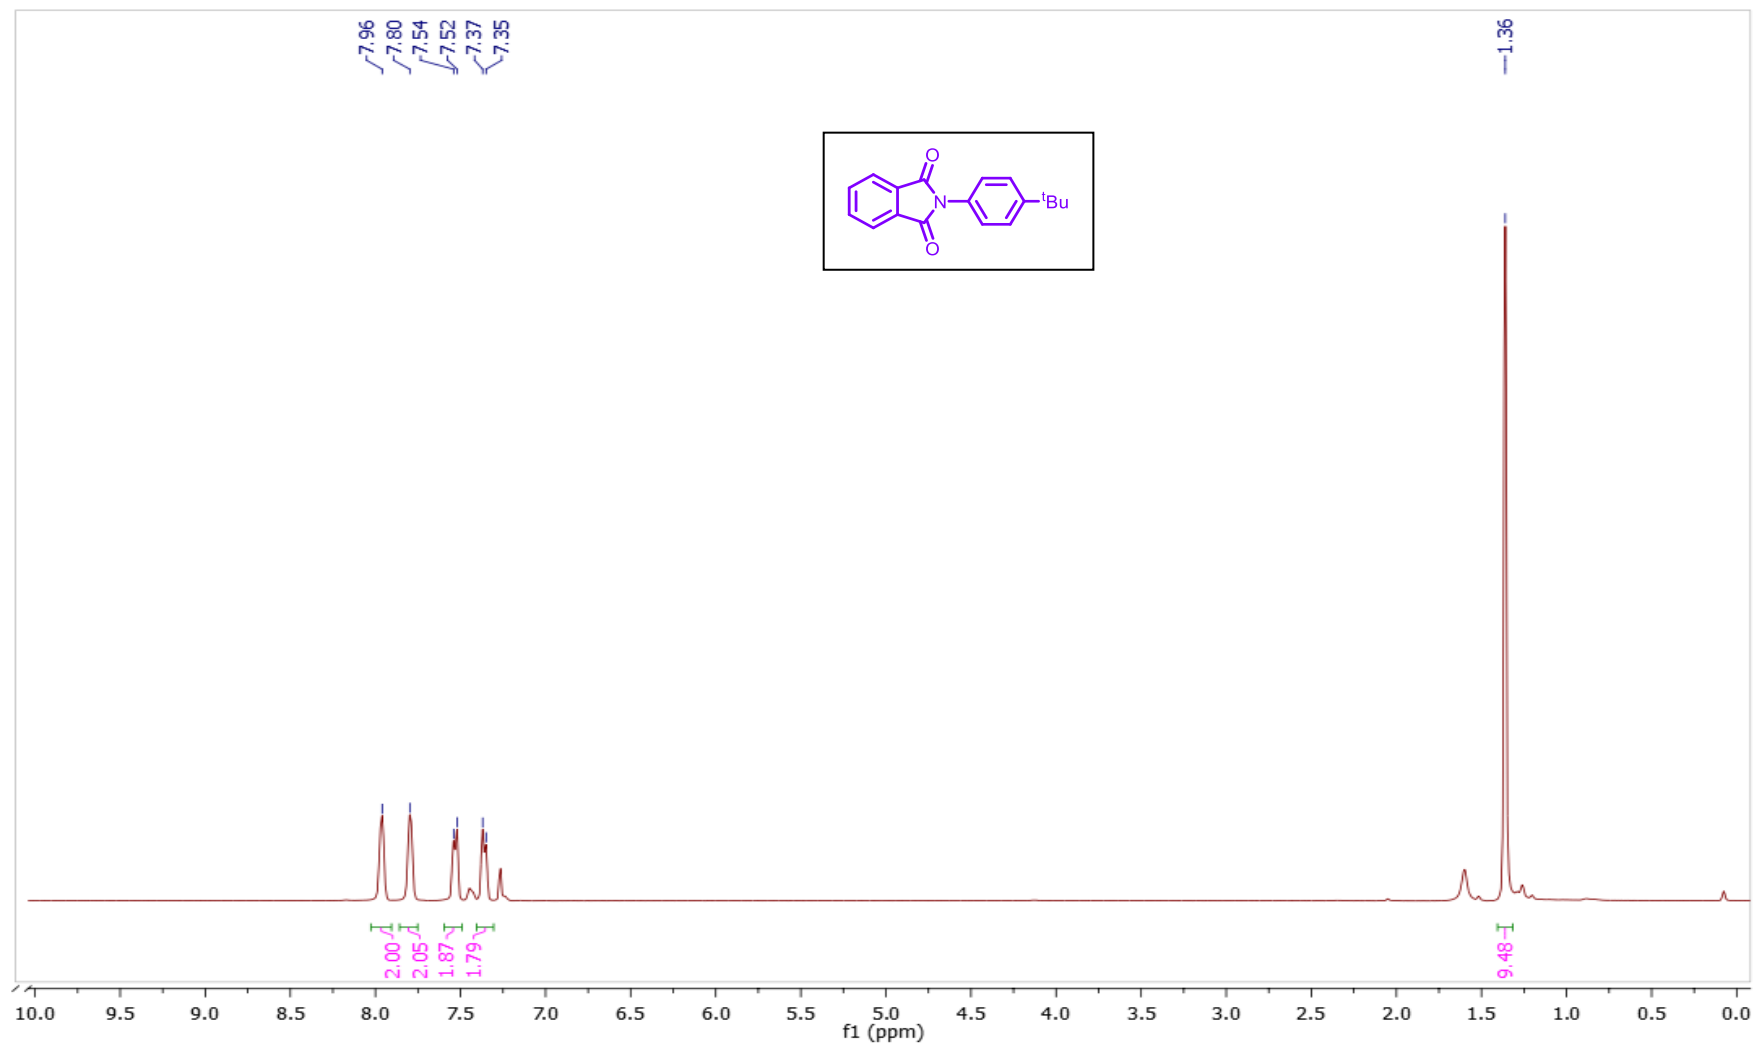

2-(4-(tert-butyl)phenyl)isoindoline-1,3-dione (4d):  $^{13}\text{C}$  NMR (75 MHz,  $\text{CDCl}_3$ ):

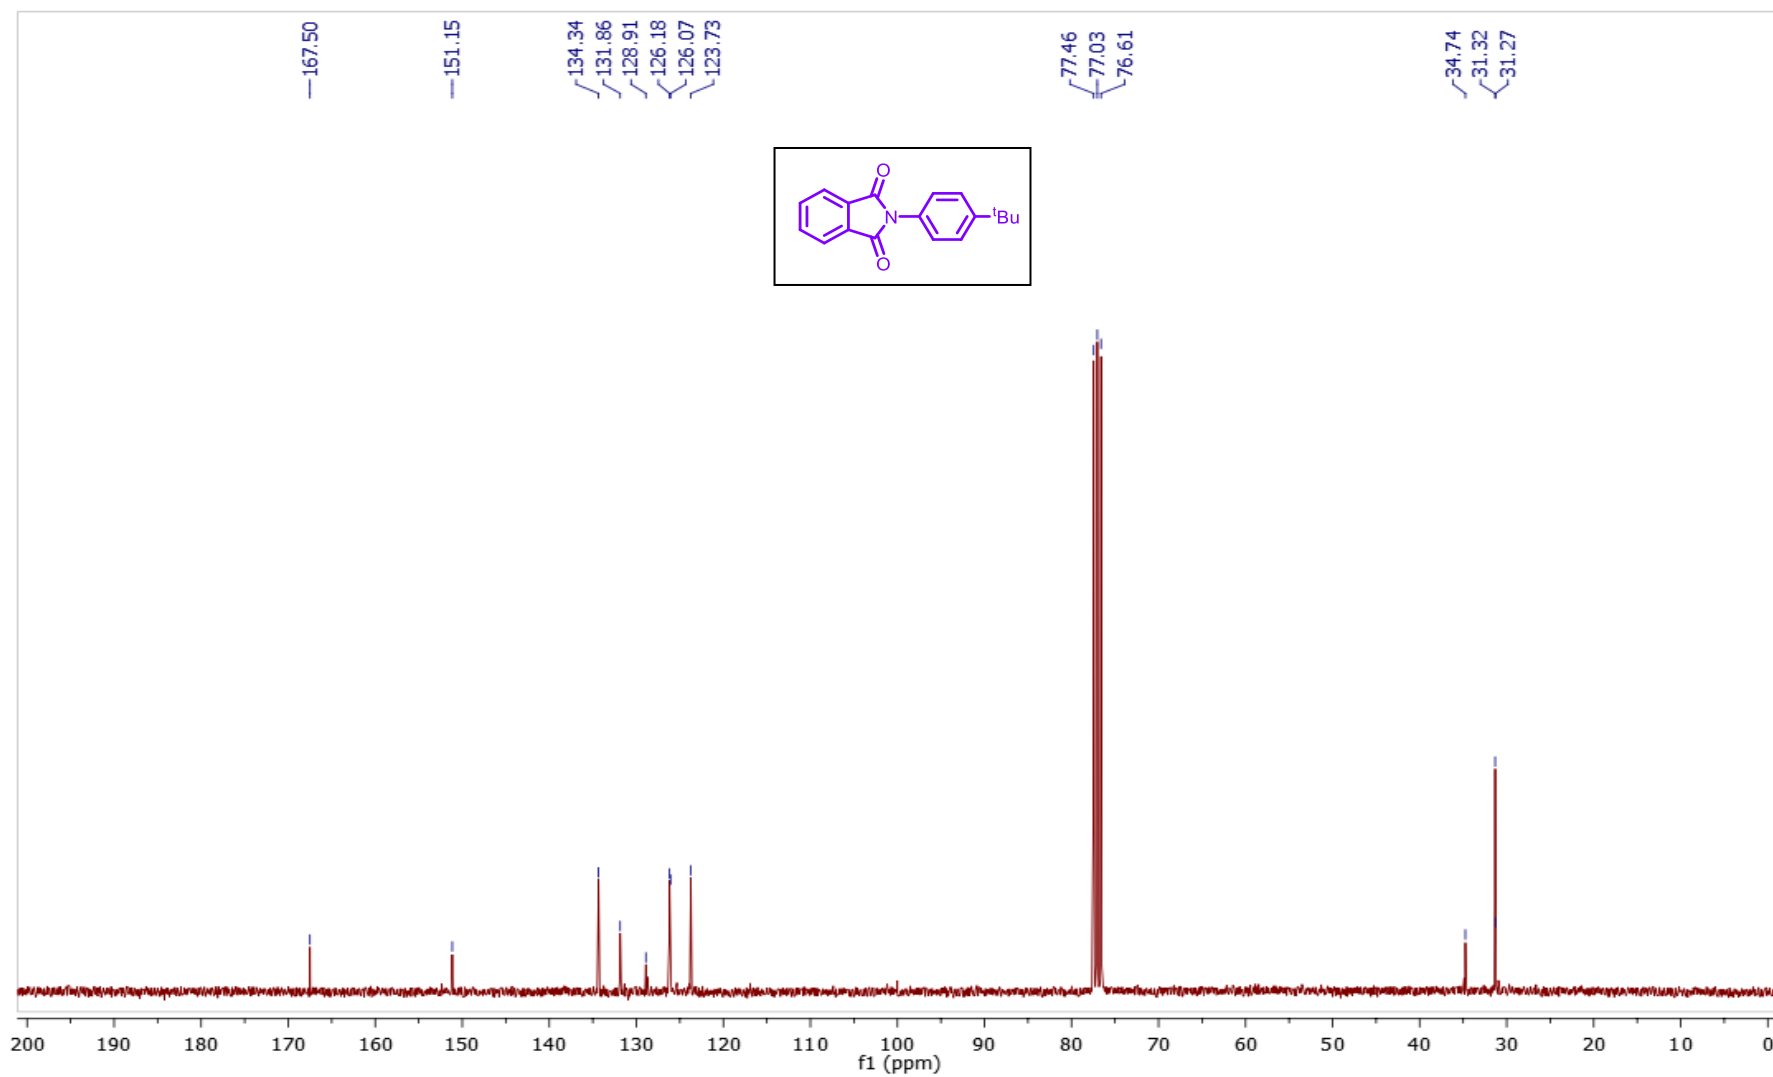



2-(3-chloro-4-fluorophenyl)isoindoline-1,3-dione (4e):  $^1\text{H}$  NMR (300 MHz,  $\text{CDCl}_3$ ):

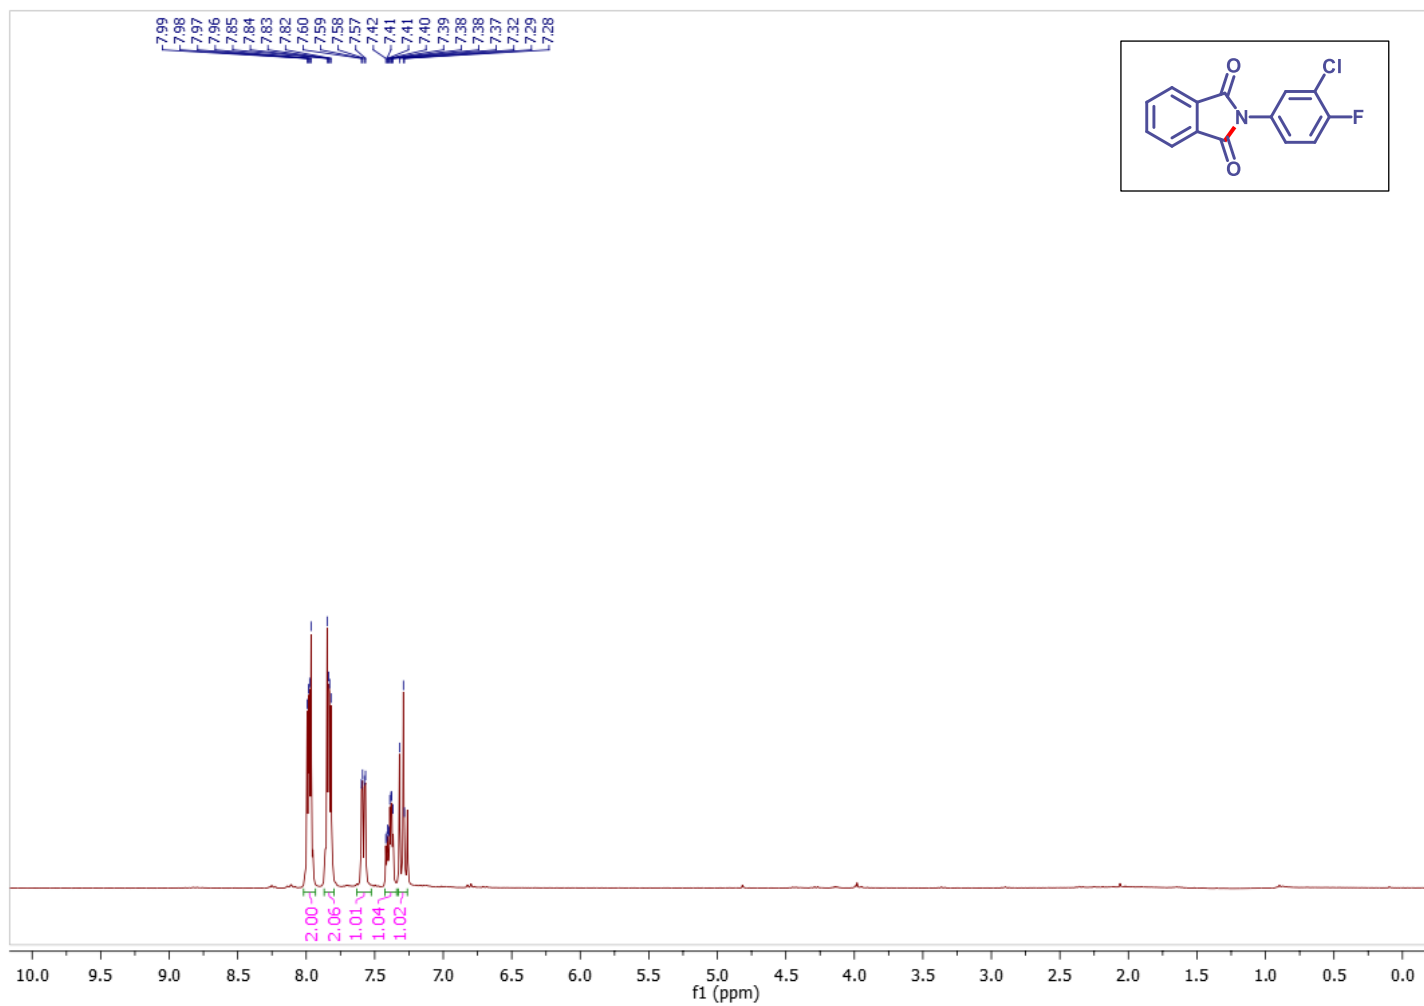

**2-(3-chloro-4-fluorophenyl)isoindoline-1,3-dione (4e):  $^{13}\text{C}$  NMR (75 MHz,  $\text{CDCl}_3$ ):**

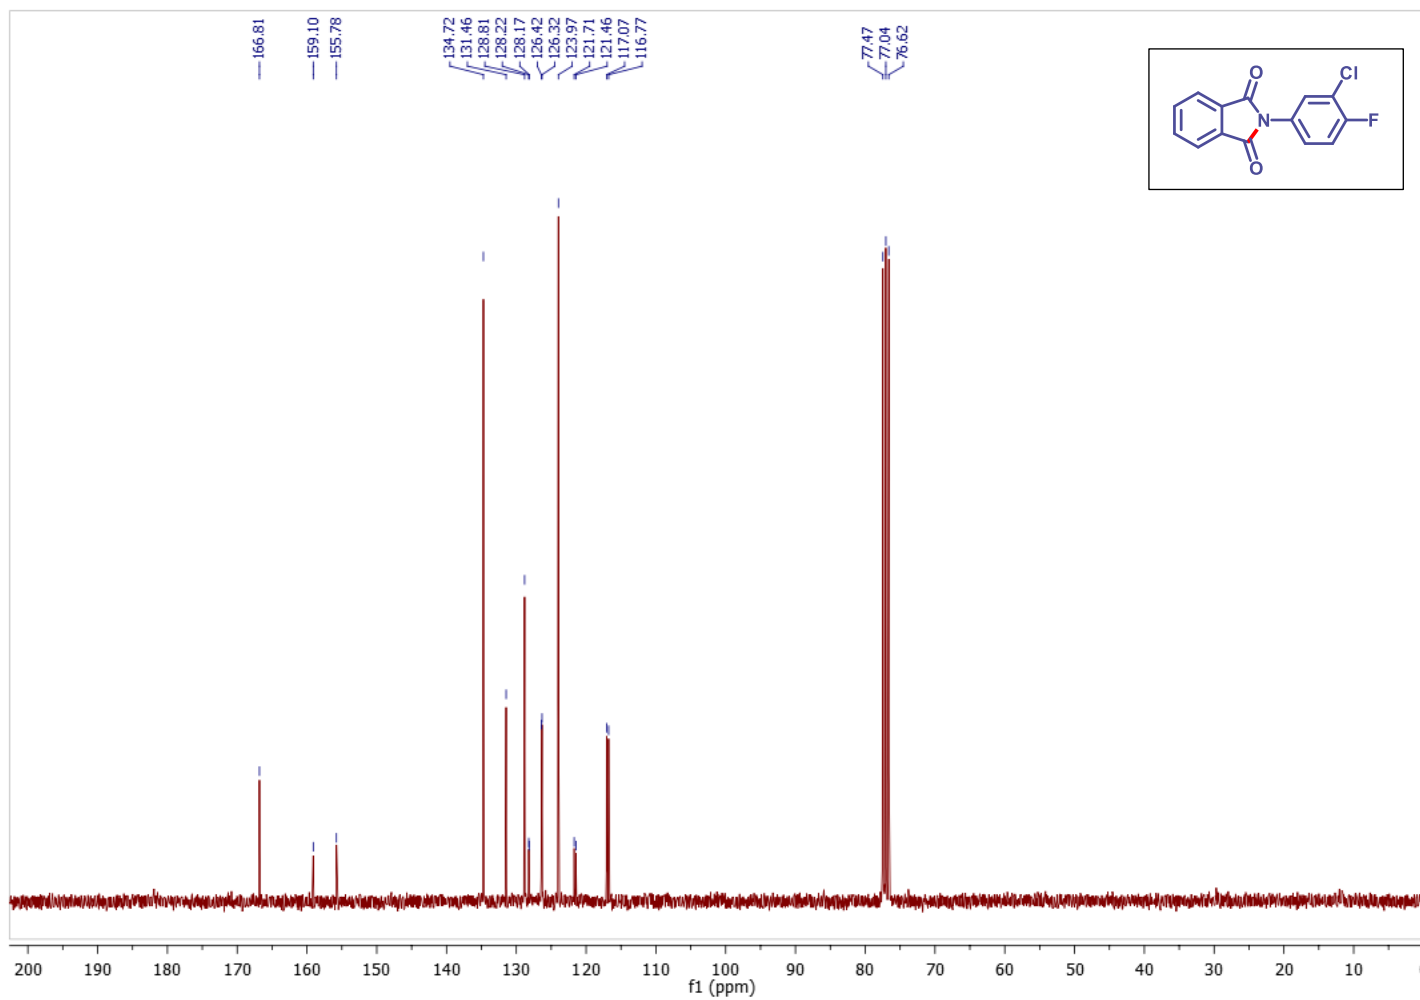

**2-(pyridin-3-yl)isoindoline-1,3-dione (4f): <sup>1</sup>H NMR (400 MHz, CDCl<sub>3</sub>):**

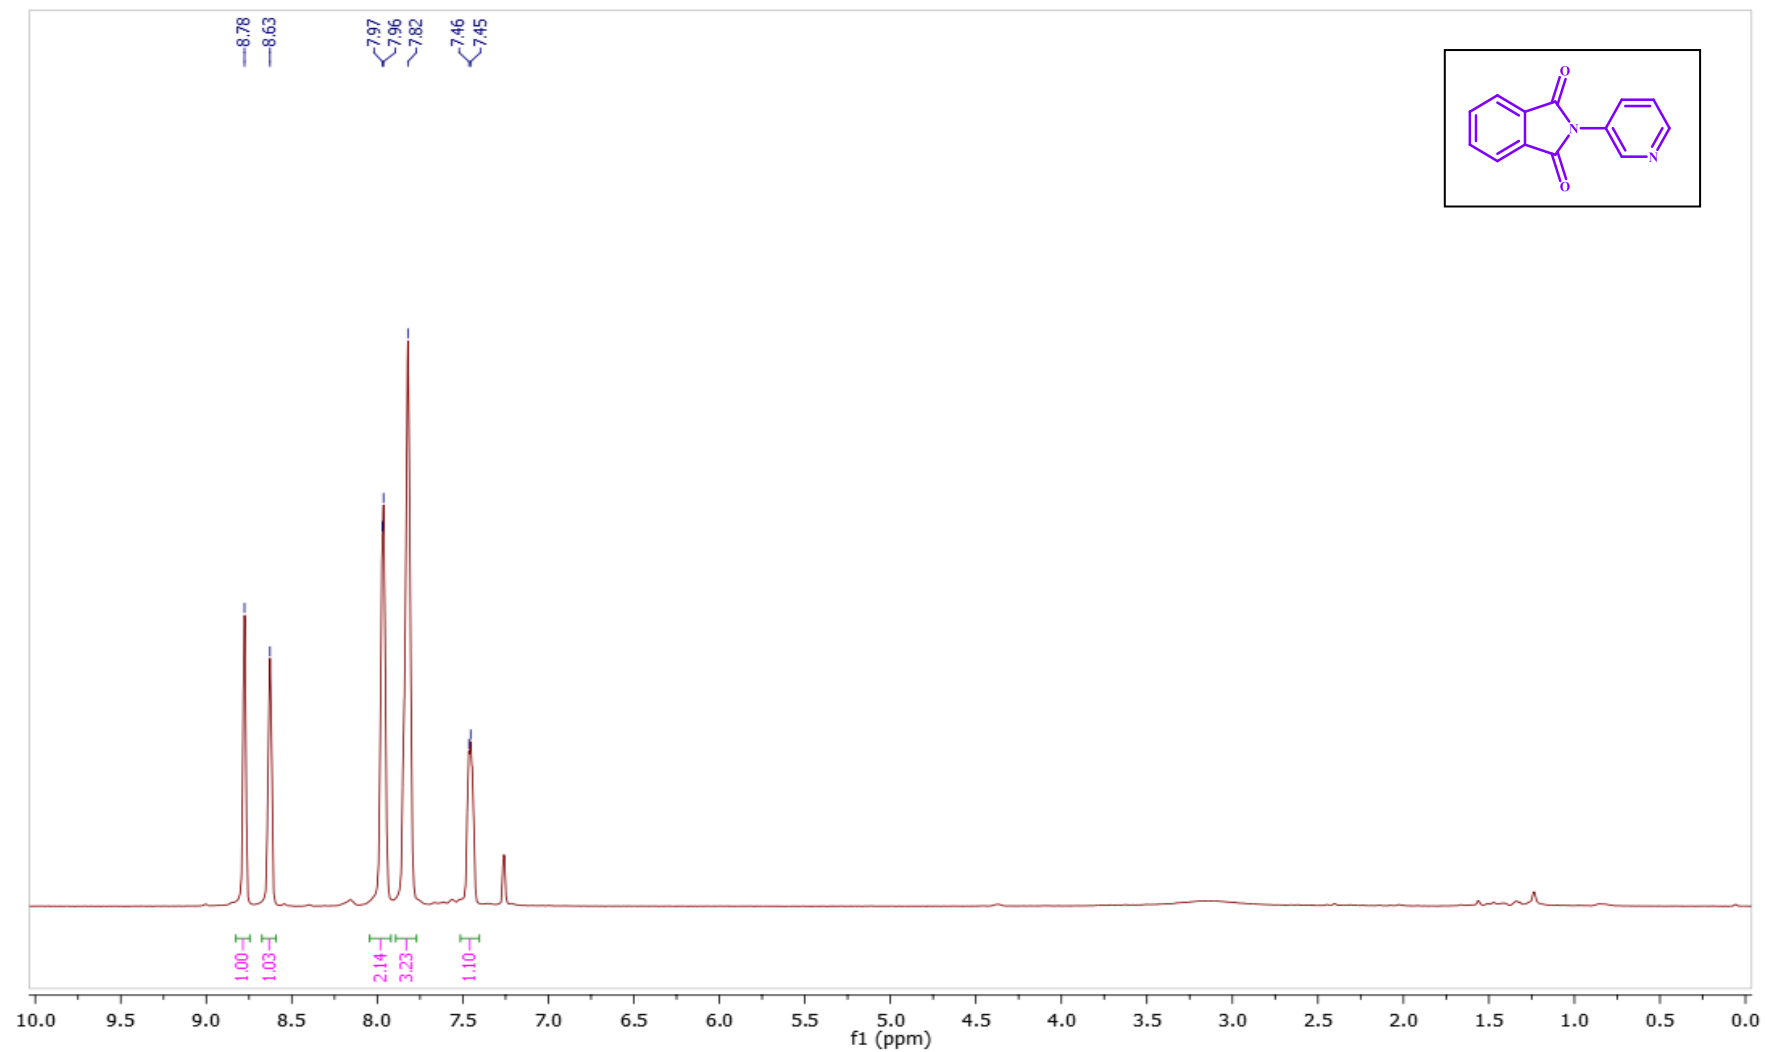

**2-(pyridin-3-yl)isoindoline-1,3-dione (4f): <sup>13</sup>C NMR (75 MHz, CDCl<sub>3</sub>):**

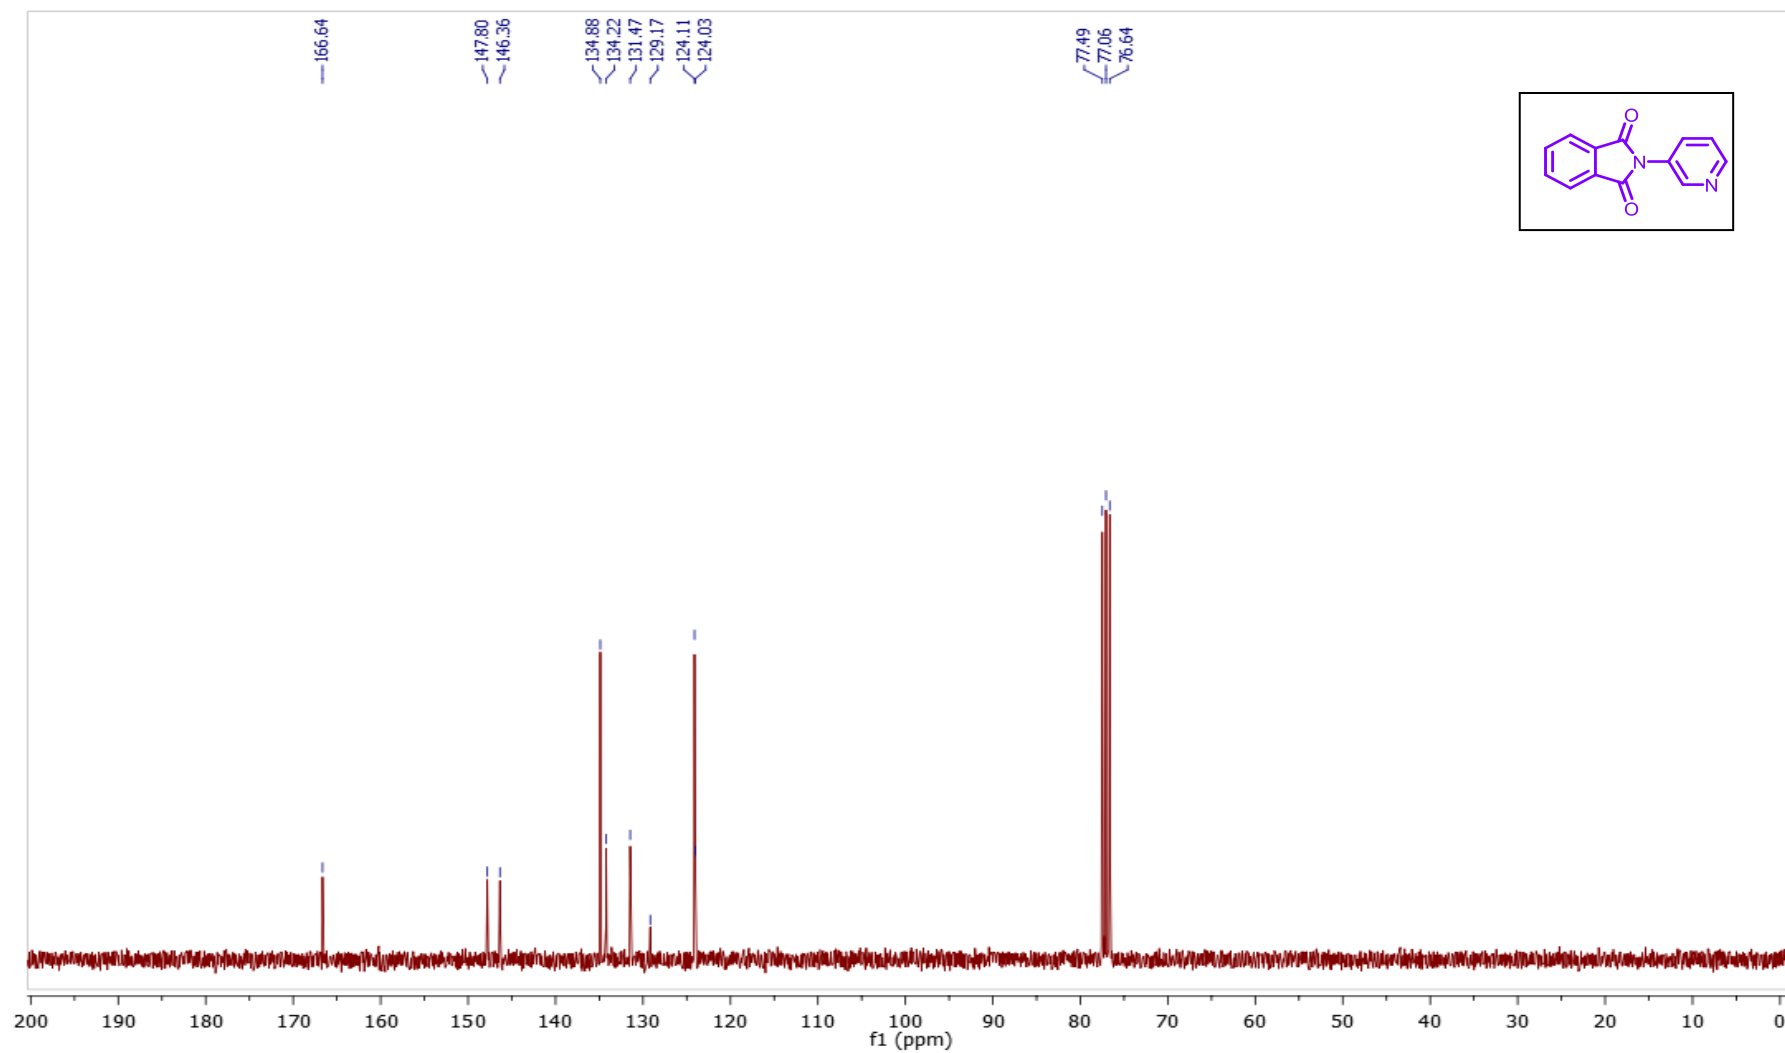

**4-chloro-2-phenylisoindoline-1,3-dione (4g):  $^1\text{H}$  NMR (300 MHz,  $\text{CDCl}_3$ ):**

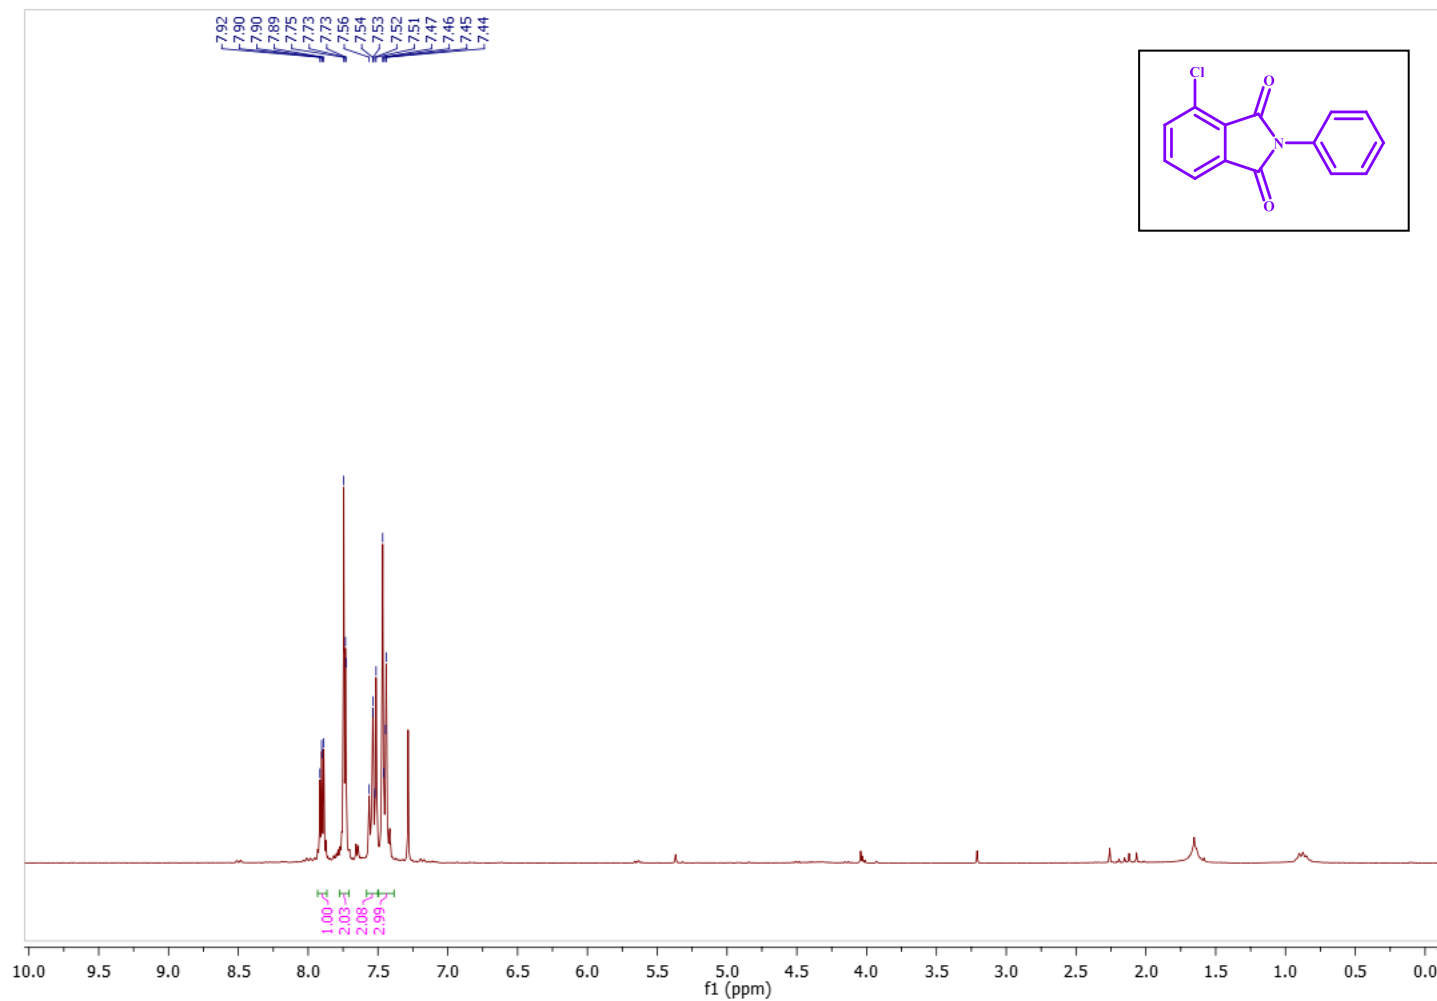

4-chloro-2-phenylisoindoline-1,3-dione (4g):  $^{13}\text{C}$  NMR (75 MHz,  $\text{CDCl}_3$ ):

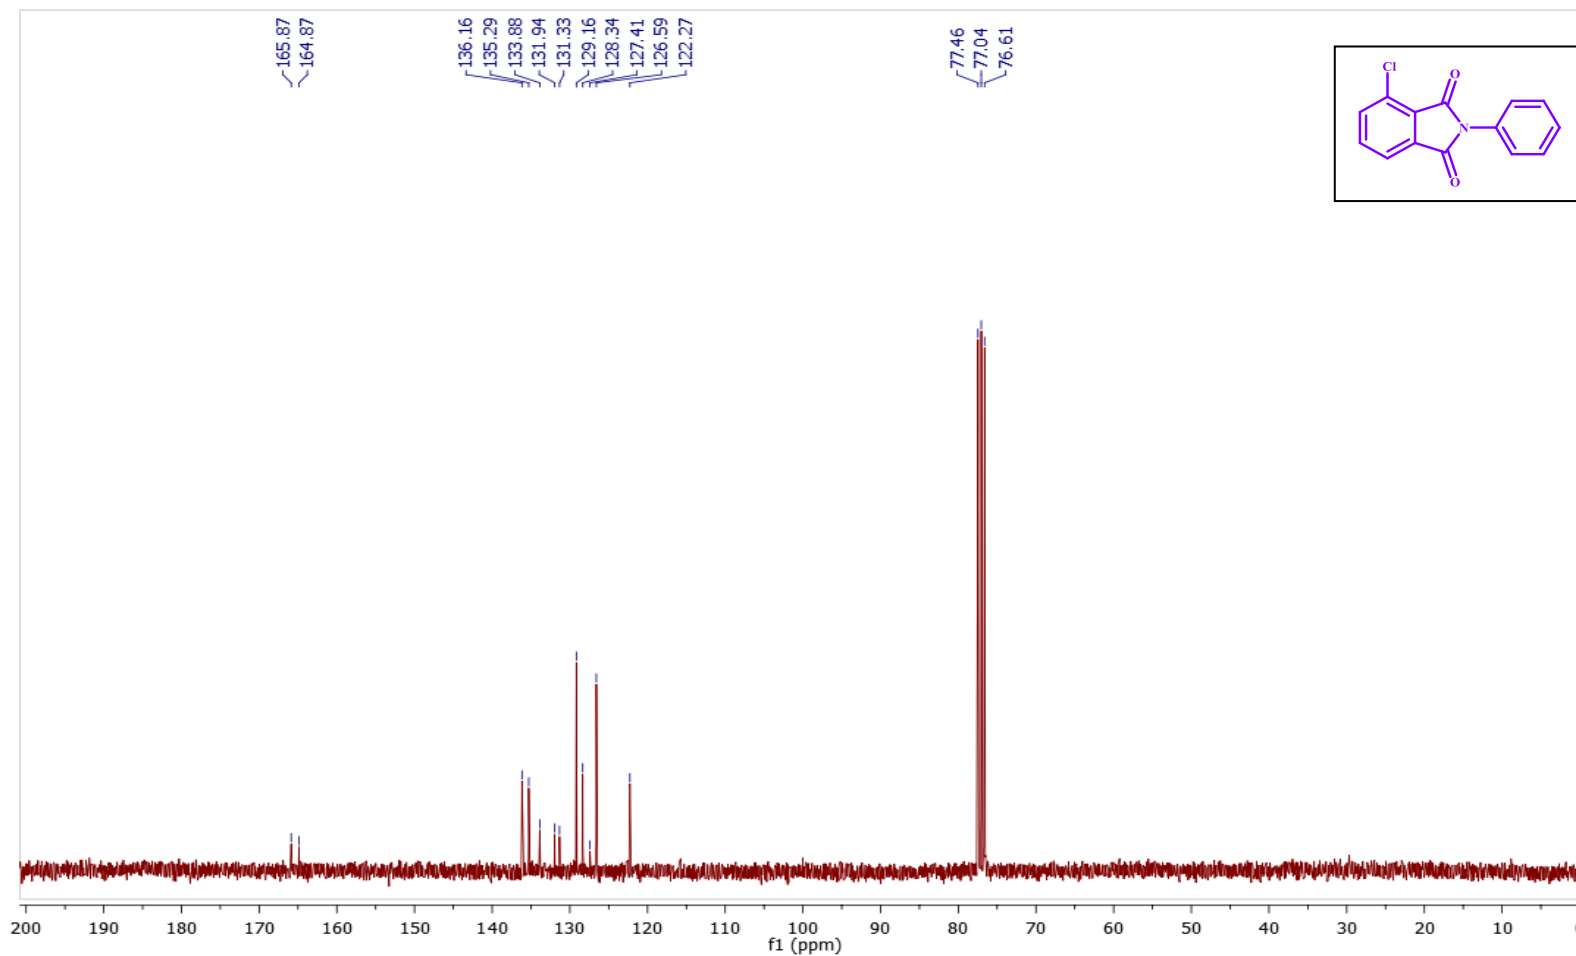

5-methyl-2-phenylisoindoline-1,3-dione (4h): <sup>1</sup>H NMR (300 MHz, CDCl<sub>3</sub>):

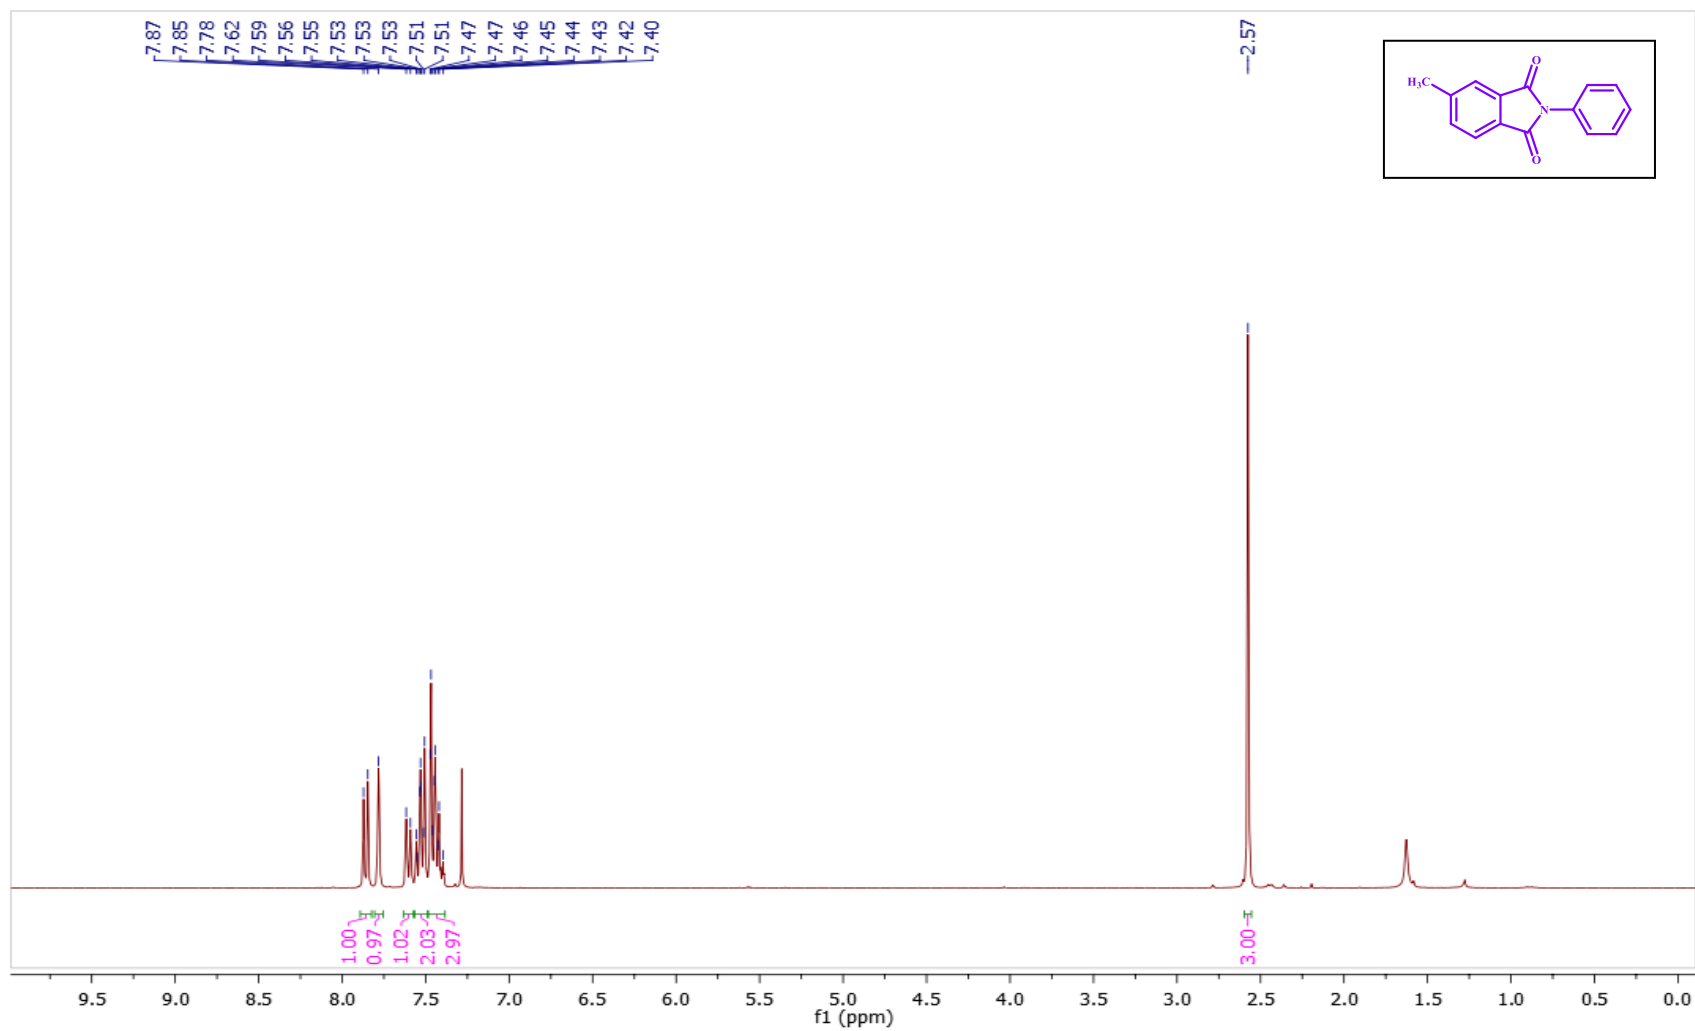

5-methyl-2-phenylisoindoline-1,3-dione (4h):  $^{13}\text{C}$  NMR (75 MHz,  $\text{CDCl}_3$ ):

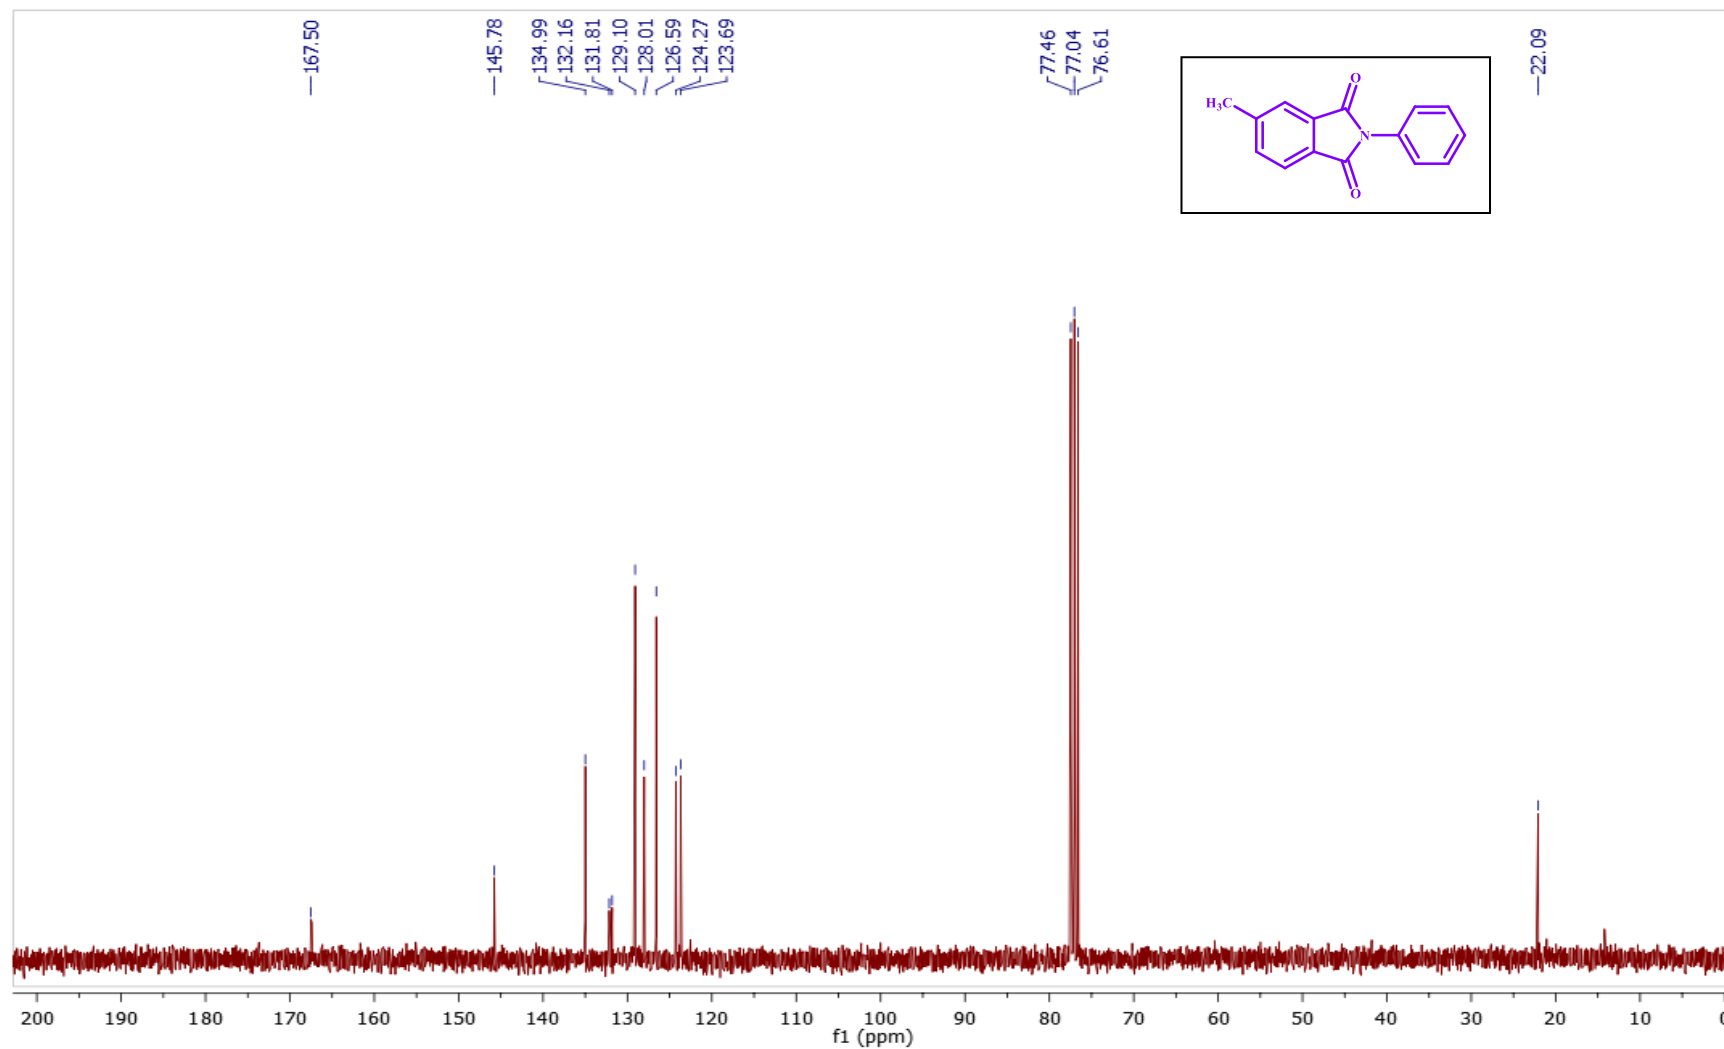



tert-butyl 2-(phenylcarbamoyl)benzoate (4'):  $^1\text{H}$  NMR (300 MHz,  $\text{DMSO-}d_6$ ):

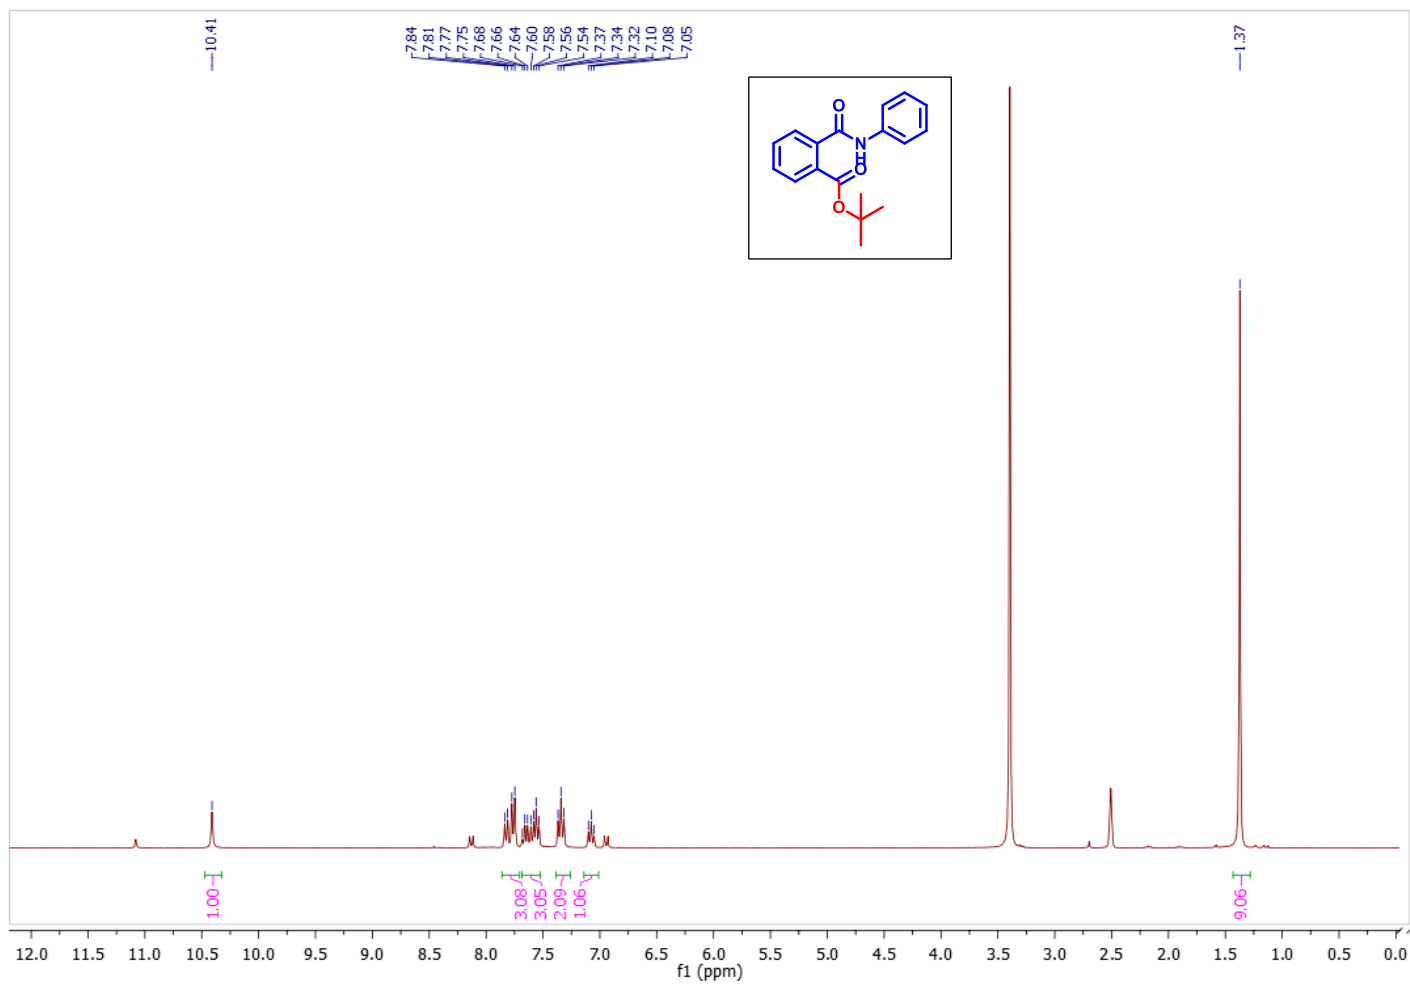

tert-butyl 2-(phenylcarbamoyl)benzoate (4'):  $^{13}\text{C}$  NMR (75 MHz,  $\text{DMSO-}d_6$ ):

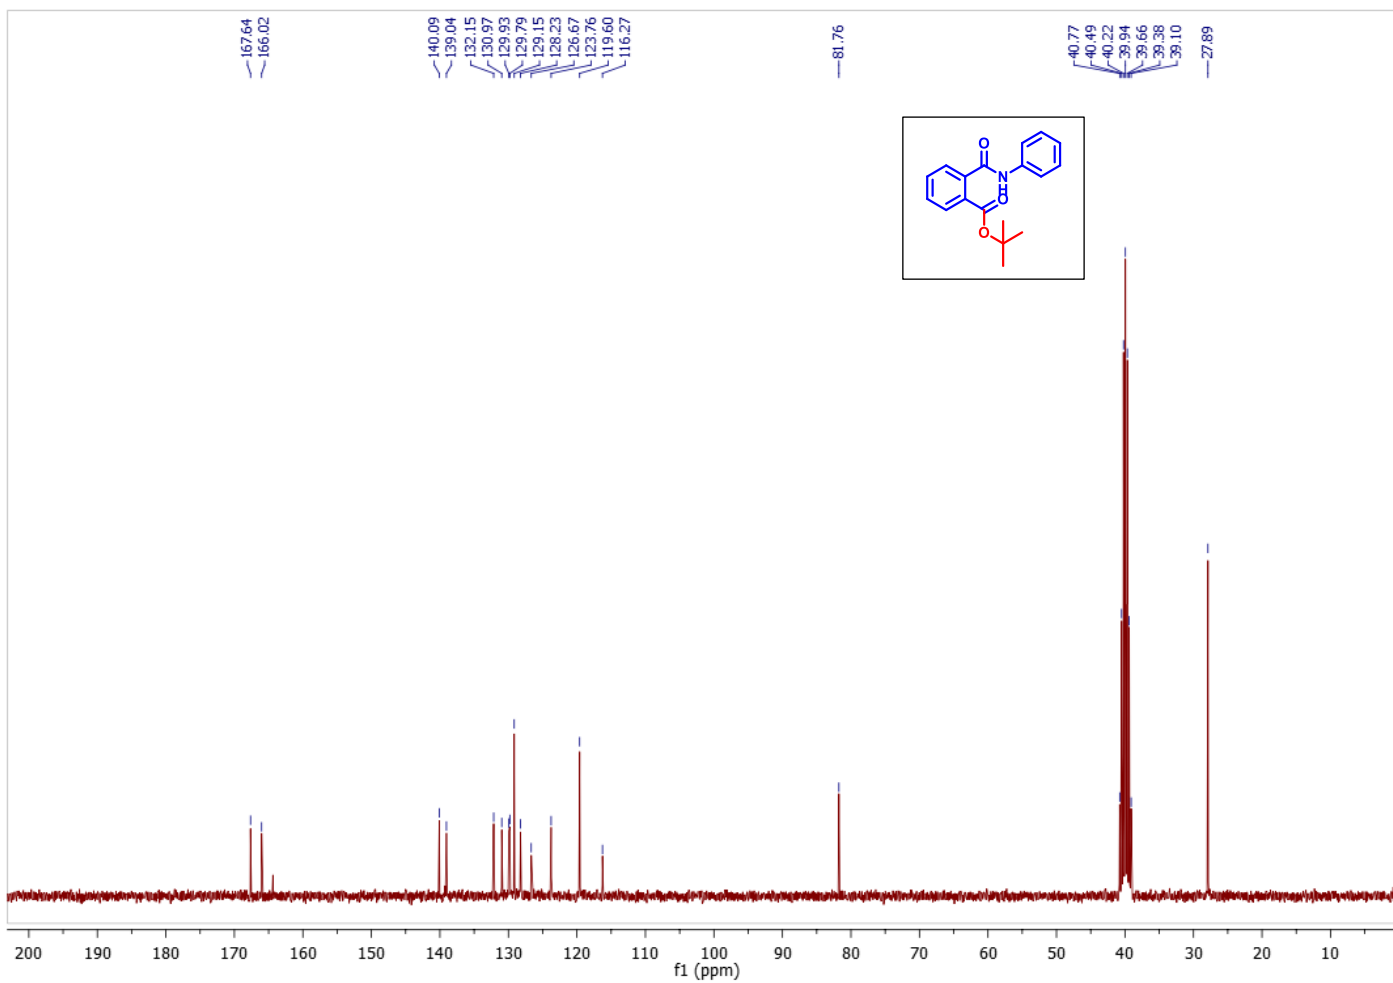

2-([1,1'-biphenyl]-2-yl)-4-hydroxyphthalazin-1(2H)-one (5): <sup>1</sup>H NMR (300 MHz, CDCl<sub>3</sub>):

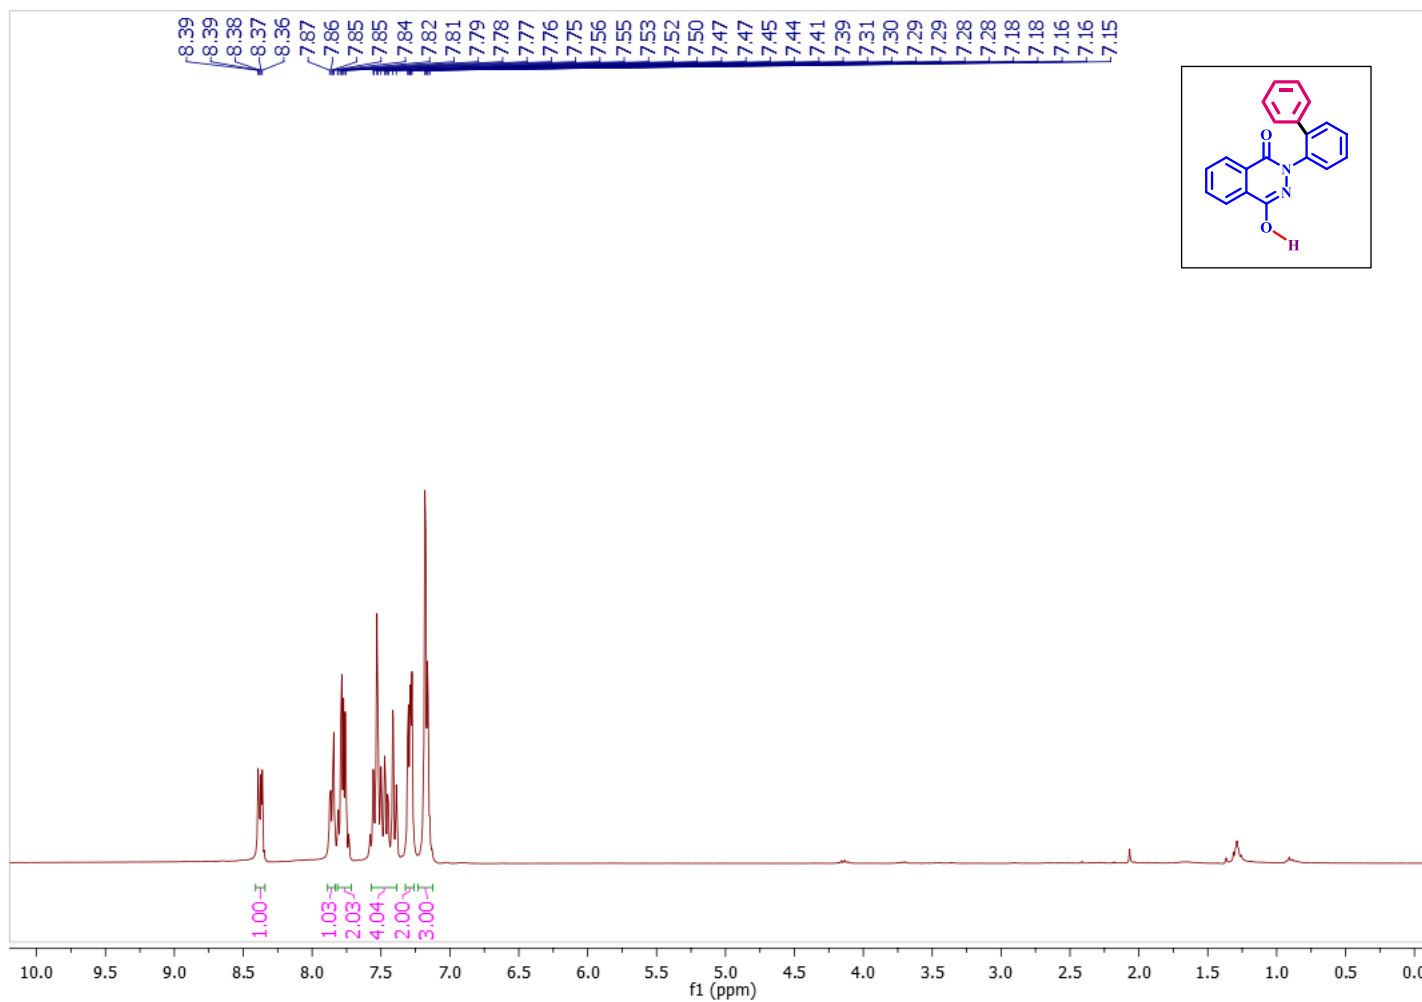

2-([1,1'-biphenyl]-2-yl)-4-hydroxyphthalazin-1(2H)-one (5):  $^{13}\text{C}$  NMR (75 MHz,  $\text{CDCl}_3$ ):

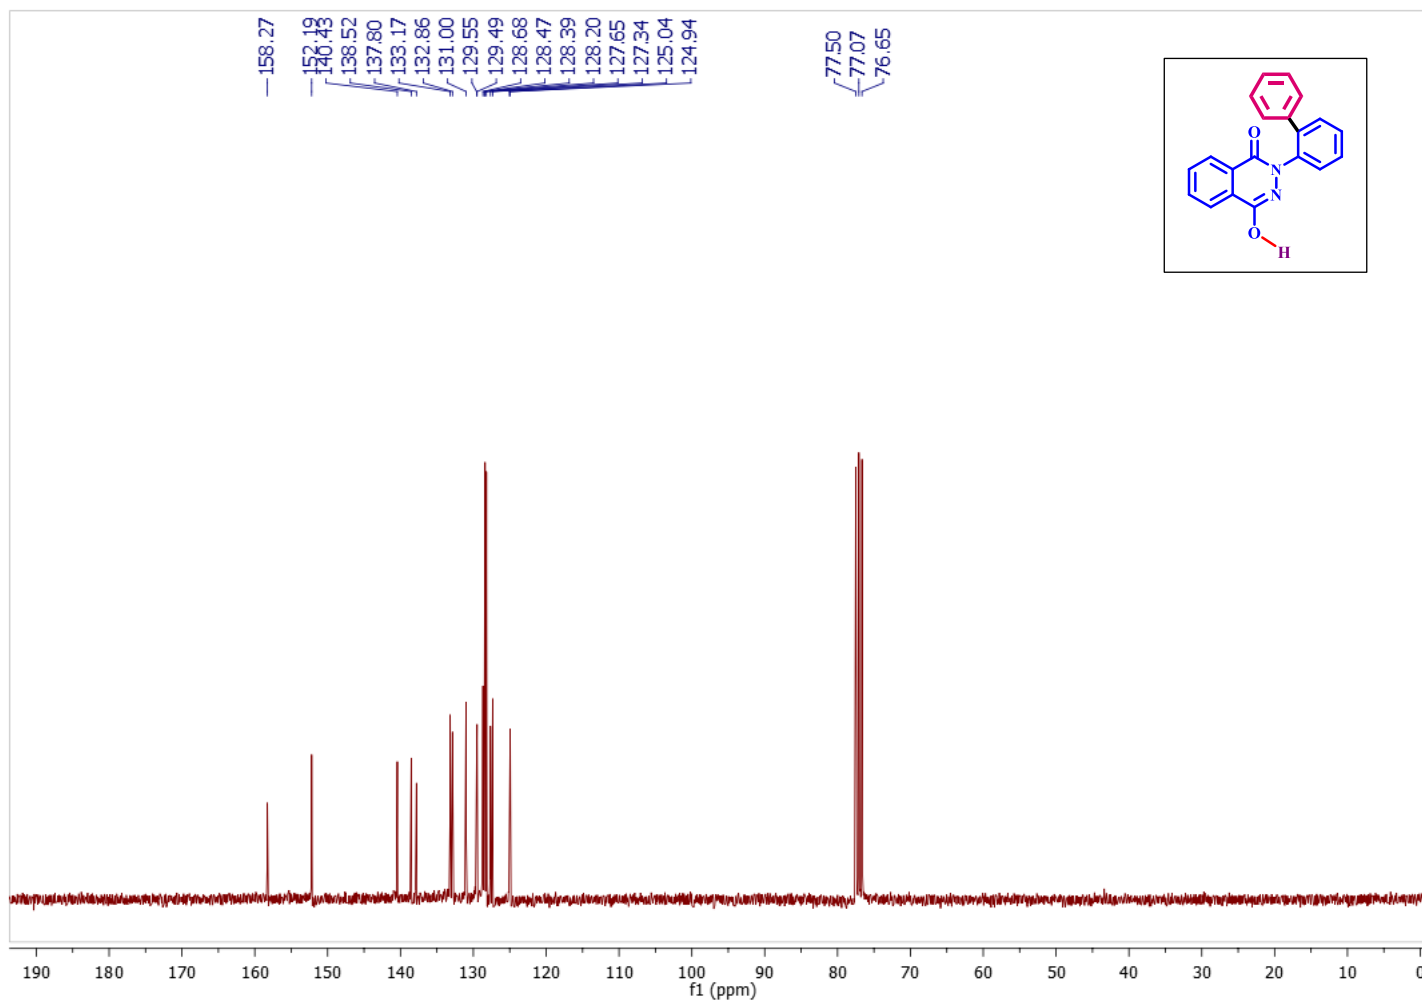

**methyl (E)-3-(2-(1-oxo-4-((2-oxocyclohexyl)oxy)phthalazin-2(1H)-yl)phenyl)acrylate (6): <sup>1</sup>H NMR (300 MHz, CDCl<sub>3</sub>):**

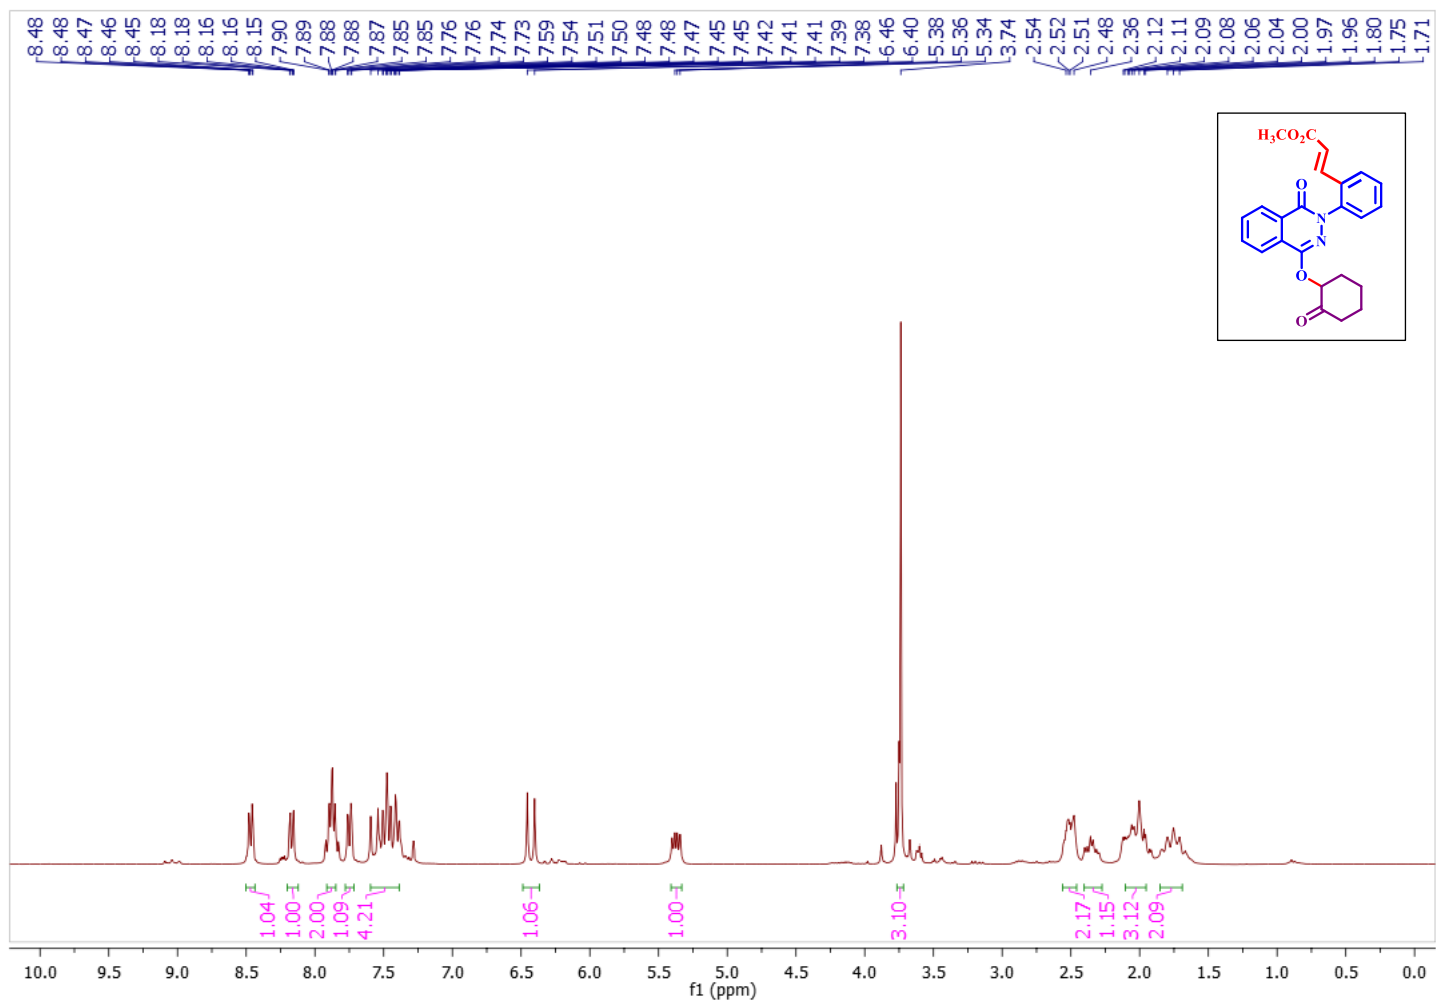

**methyl (E)-3-(2-(1-oxo-4-((2-oxocyclohexyl)oxy)phthalazin-2(1H)-yl)phenyl)acrylate (6):  $^{13}\text{C}$  NMR (75 MHz,  $\text{CDCl}_3$ ):**

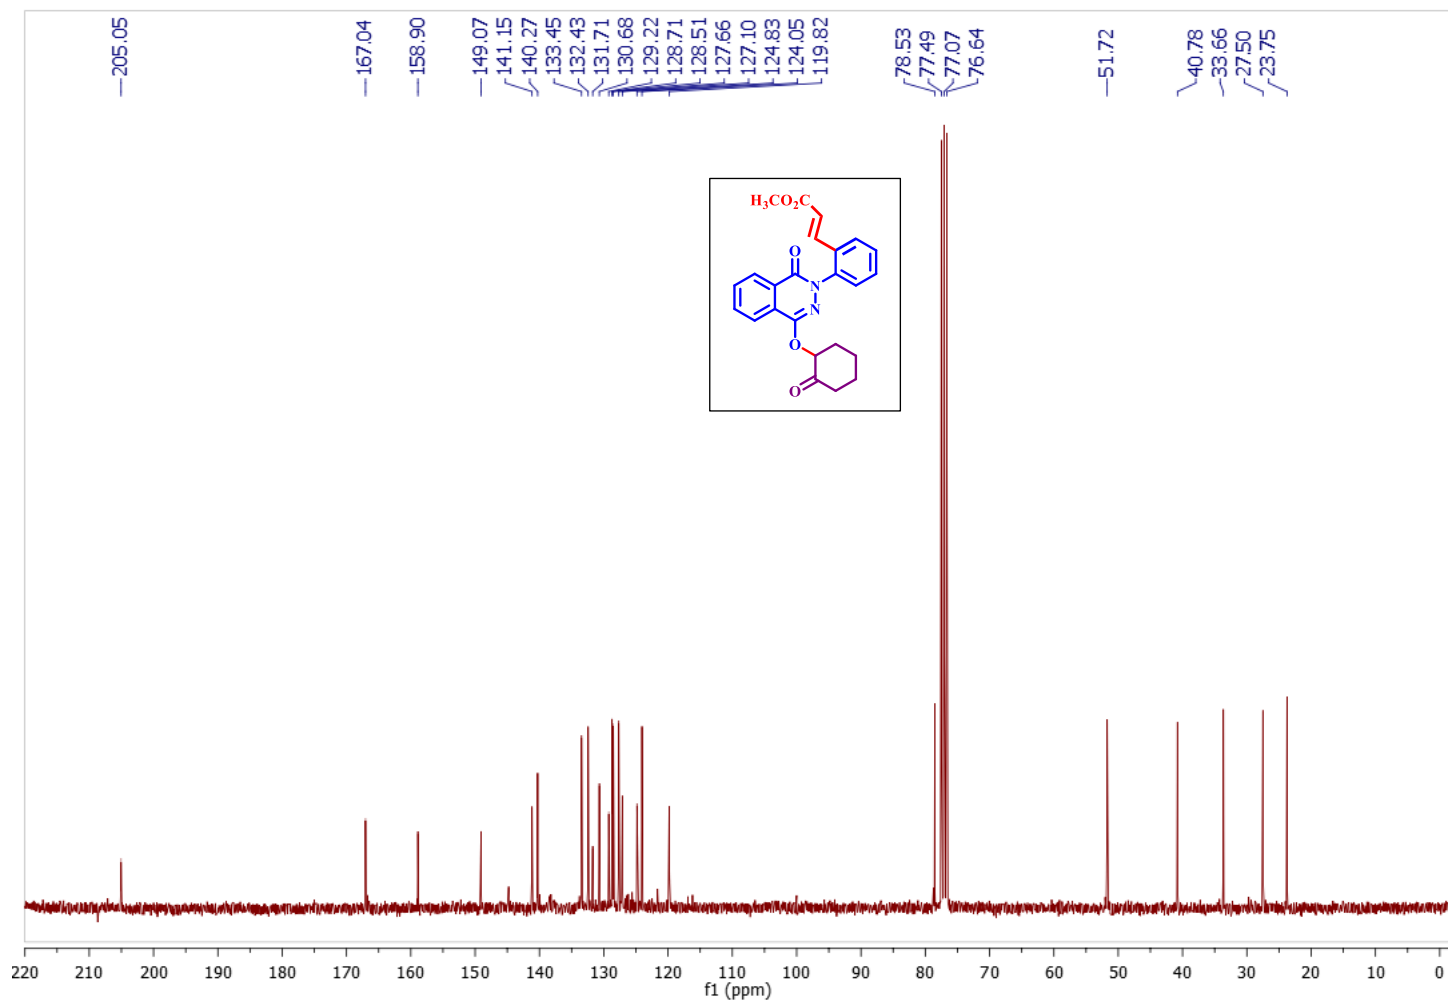

methyl (E)-3-(2-(1-oxo-4-(2-oxo-1-((4-oxo-3-phenyl-3,4-dihydrophthalazin-1-yl)oxy)-2-(p-tolylethoxy)phthalazin-2(1H)-yl)phenyl)acrylate (7):  $^1\text{H}$  NMR (300 MHz,  $\text{CDCl}_3$ ):

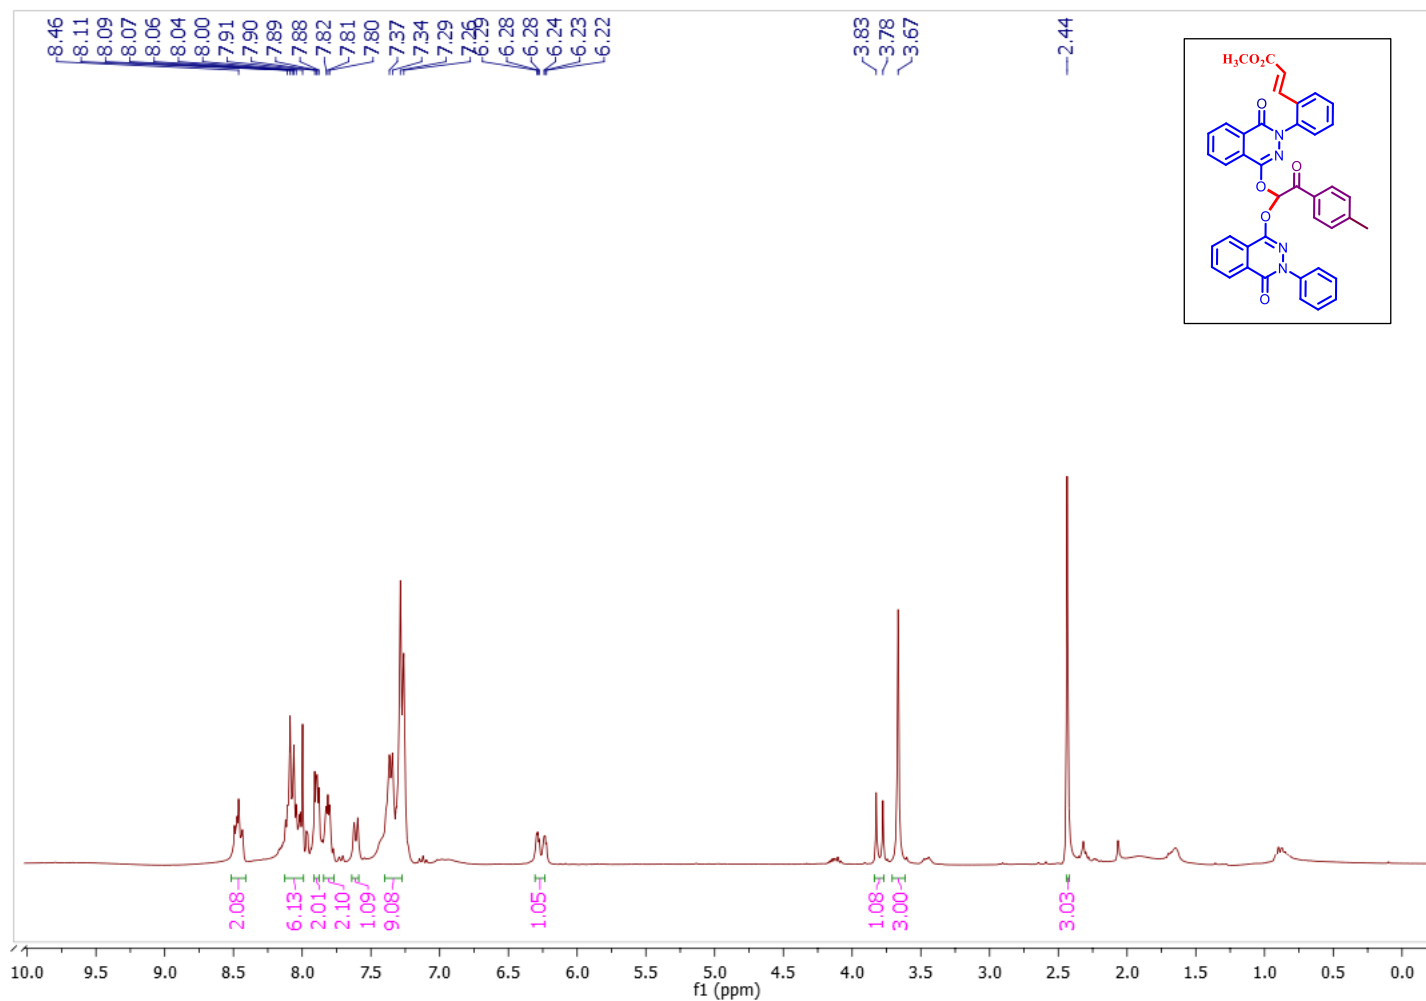

methyl (E)-3-(2-(1-oxo-4-(2-oxo-1-((4-oxo-3-phenyl-3,4-dihydrophthalazin-1-yl)oxy)-2-(p-tolylethoxy)phthalazin-2(1H)-yl)phenyl)acrylate (7):  $^{13}\text{C}$  NMR (75 MHz,  $\text{CDCl}_3$ ):

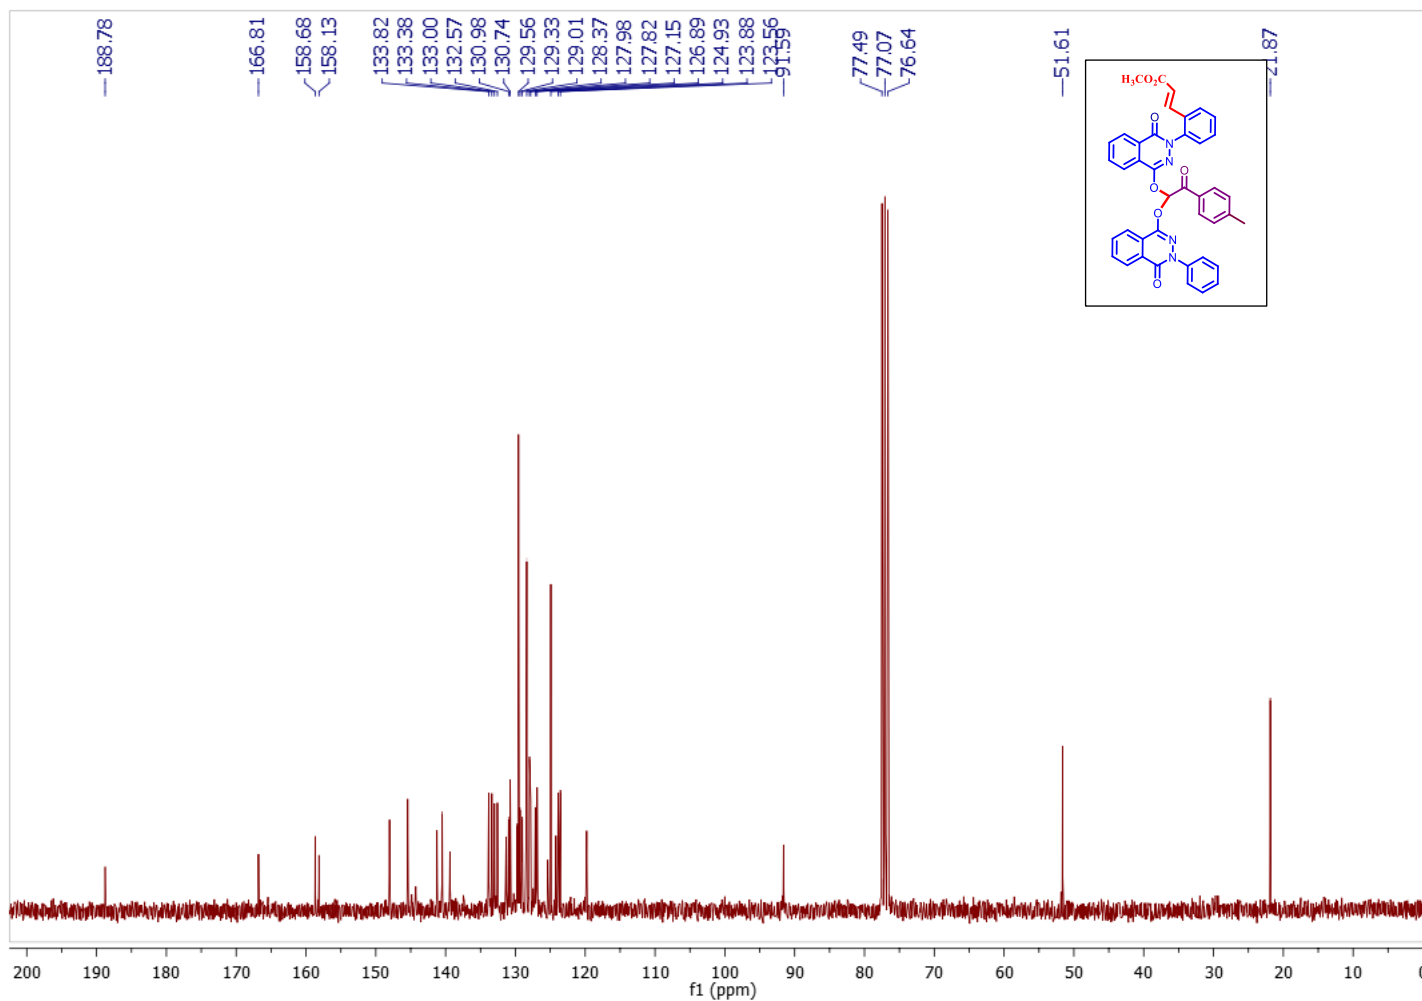





(E)-4-((5-methyl-2,3-diphenyl-1H-inden-1-ylidene)methoxy)-2-phenylphthalazin-1(2H)-one (8): <sup>1</sup>H NMR (300 MHz, CDCl<sub>3</sub>): <sup>13</sup>C NMR (75 MHz, CDCl<sub>3</sub>):

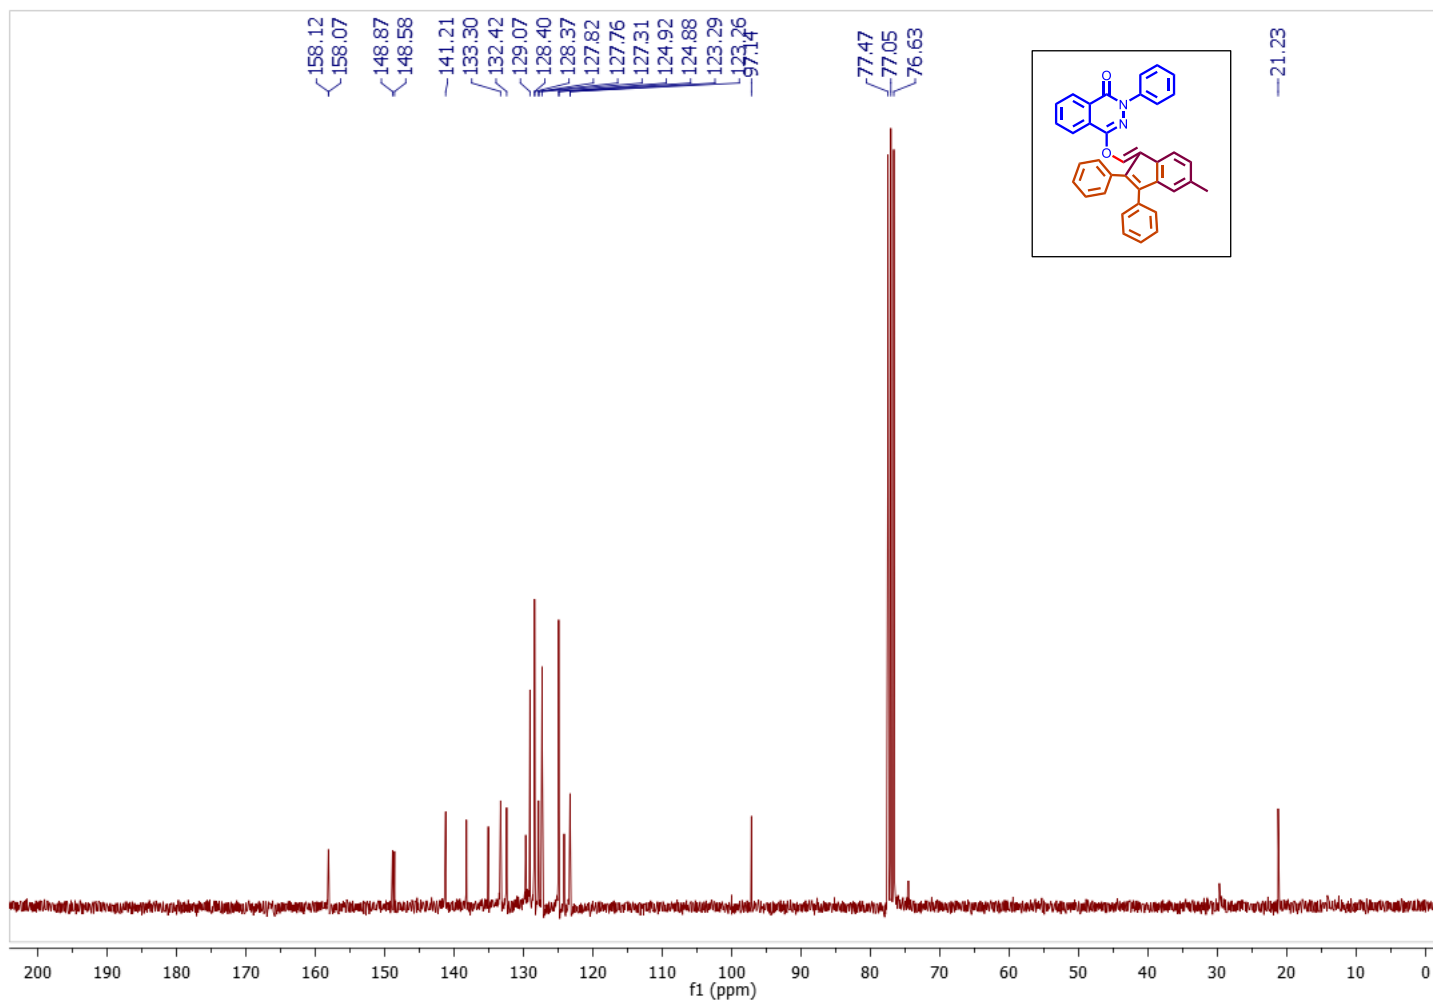

methyl (E)-3-(2-(4-((1,3-dioxo-1,3-diphenylpropan-2-yl)oxy)-1-oxophthalazin-2(1H)-yl)phenyl)acrylate (9): <sup>1</sup>H NMR (300 MHz, CDCl<sub>3</sub>):

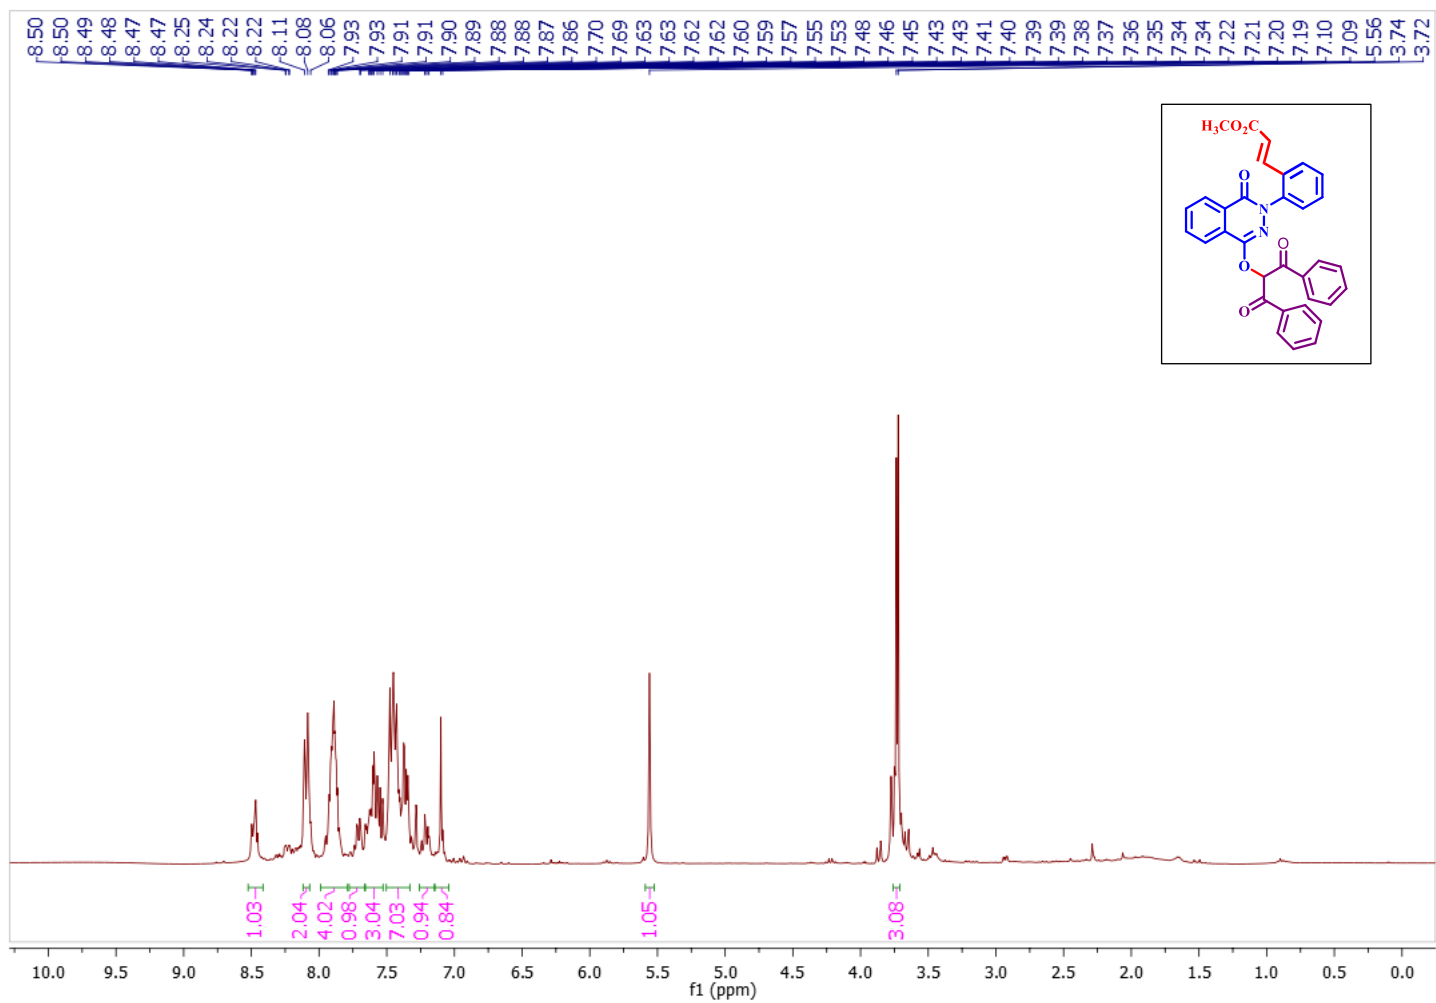

methyl (E)-3-(2-(4-((1,3-dioxo-1,3-diphenylpropan-2-yl)oxy)-1-oxophthalazin-2(1H)-yl)phenyl)acrylate (9):  $^{13}\text{C}$  NMR (75 MHz,  $\text{CDCl}_3$ ):

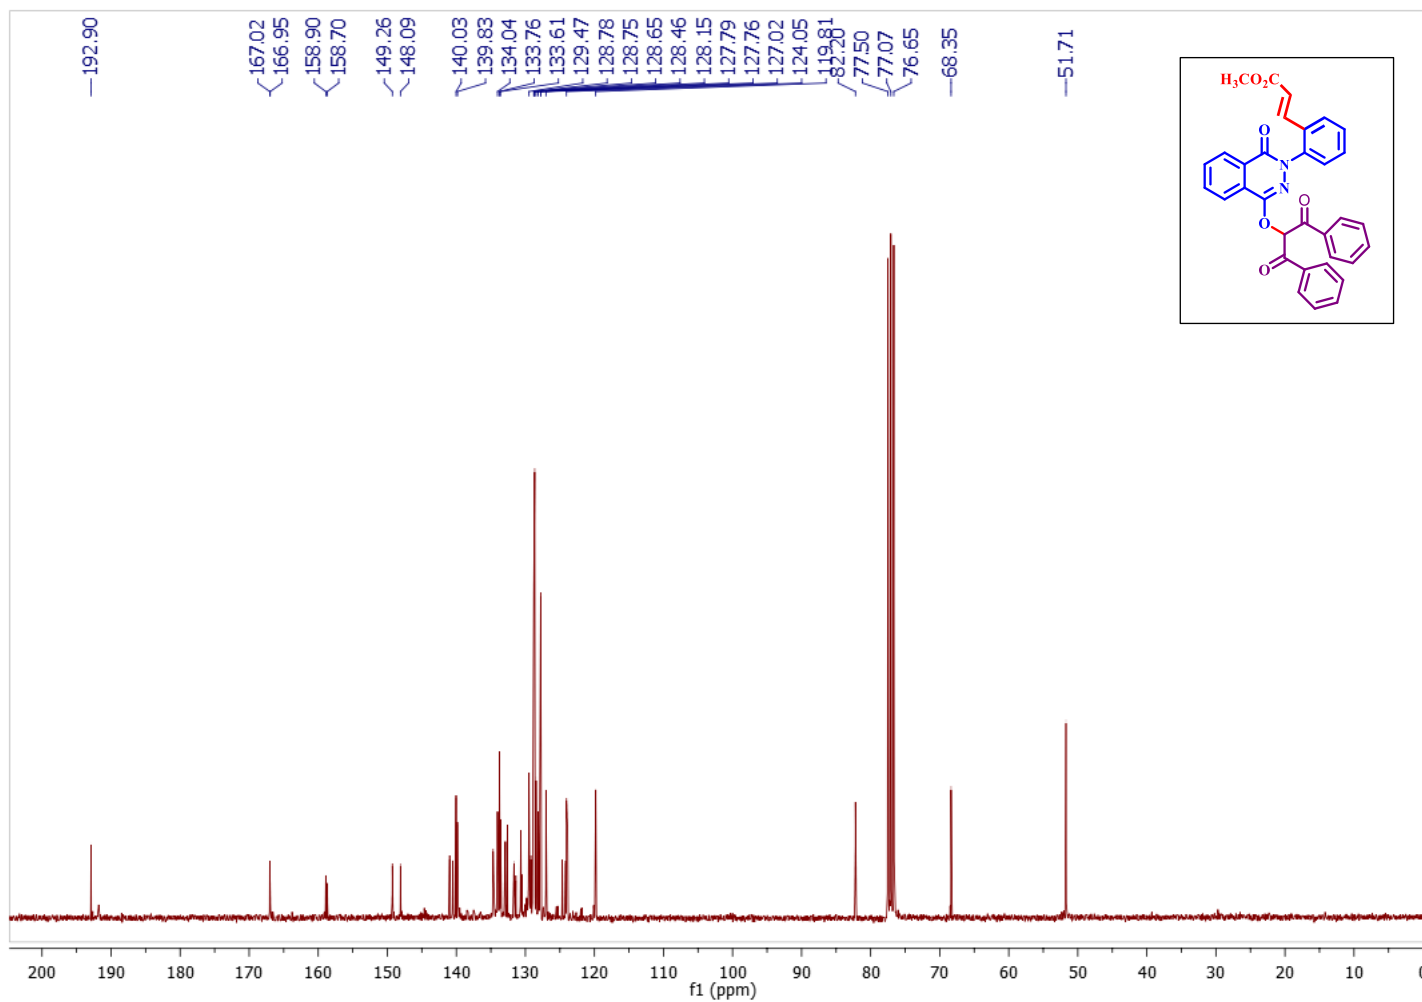

**4-hydroxy-2-phenylphthalazin-1(2H)-one (1a): <sup>1</sup>H NMR (300 MHz, CDCl<sub>3</sub>):**

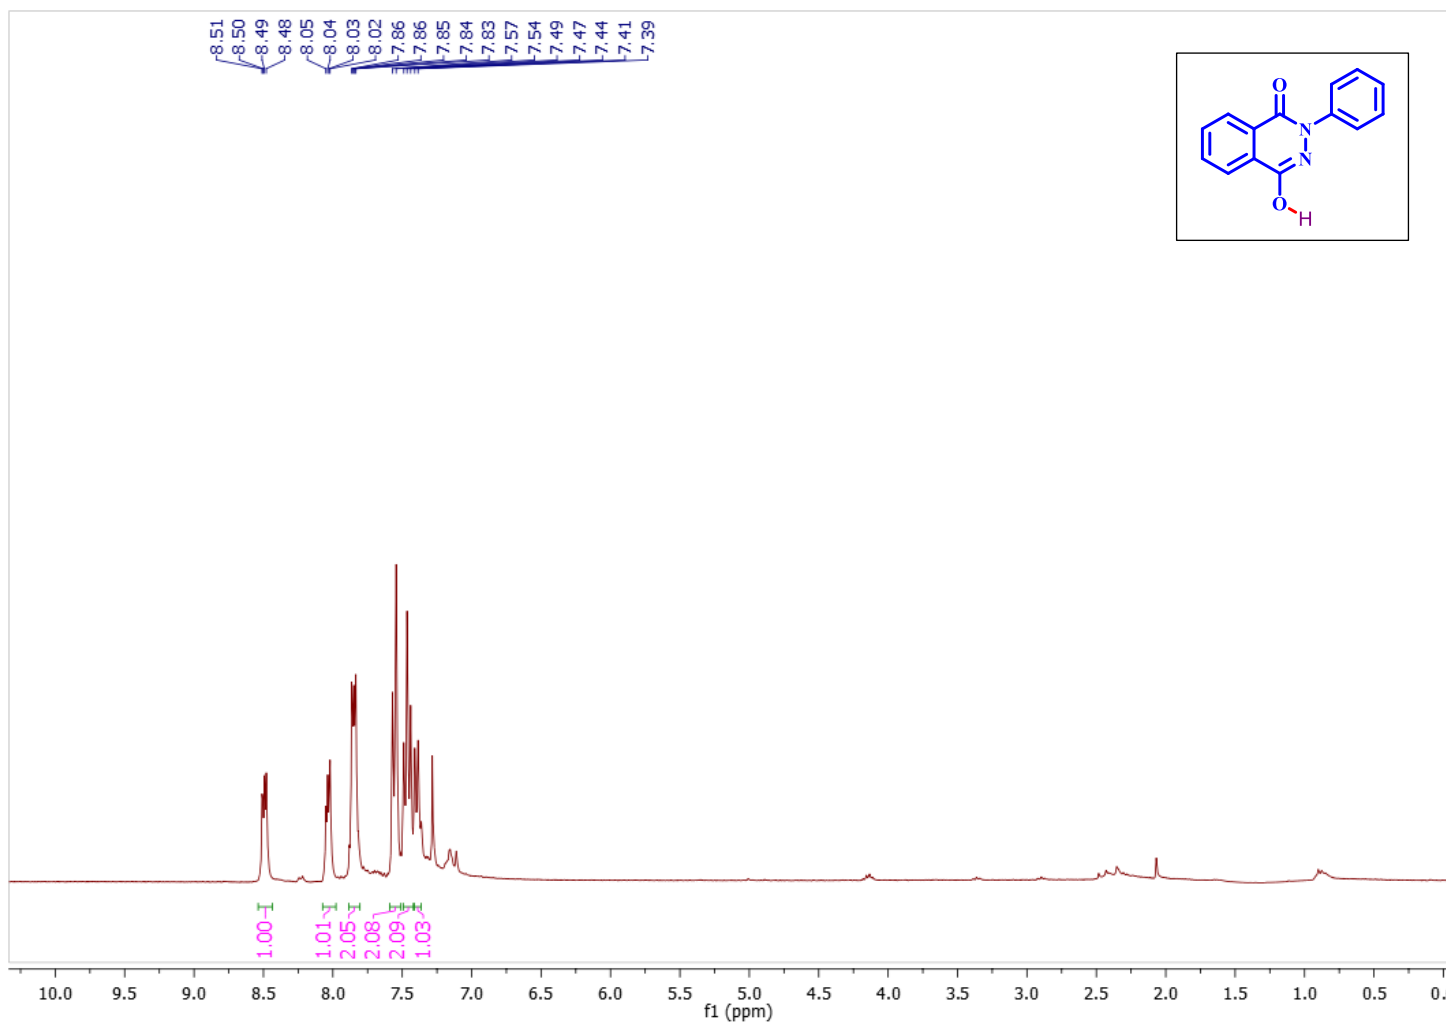

**4-hydroxy-2-phenylphthalazin-1(2H)-one (1a):  $^{13}\text{C}$  NMR (75 MHz,  $\text{CDCl}_3$ ):**

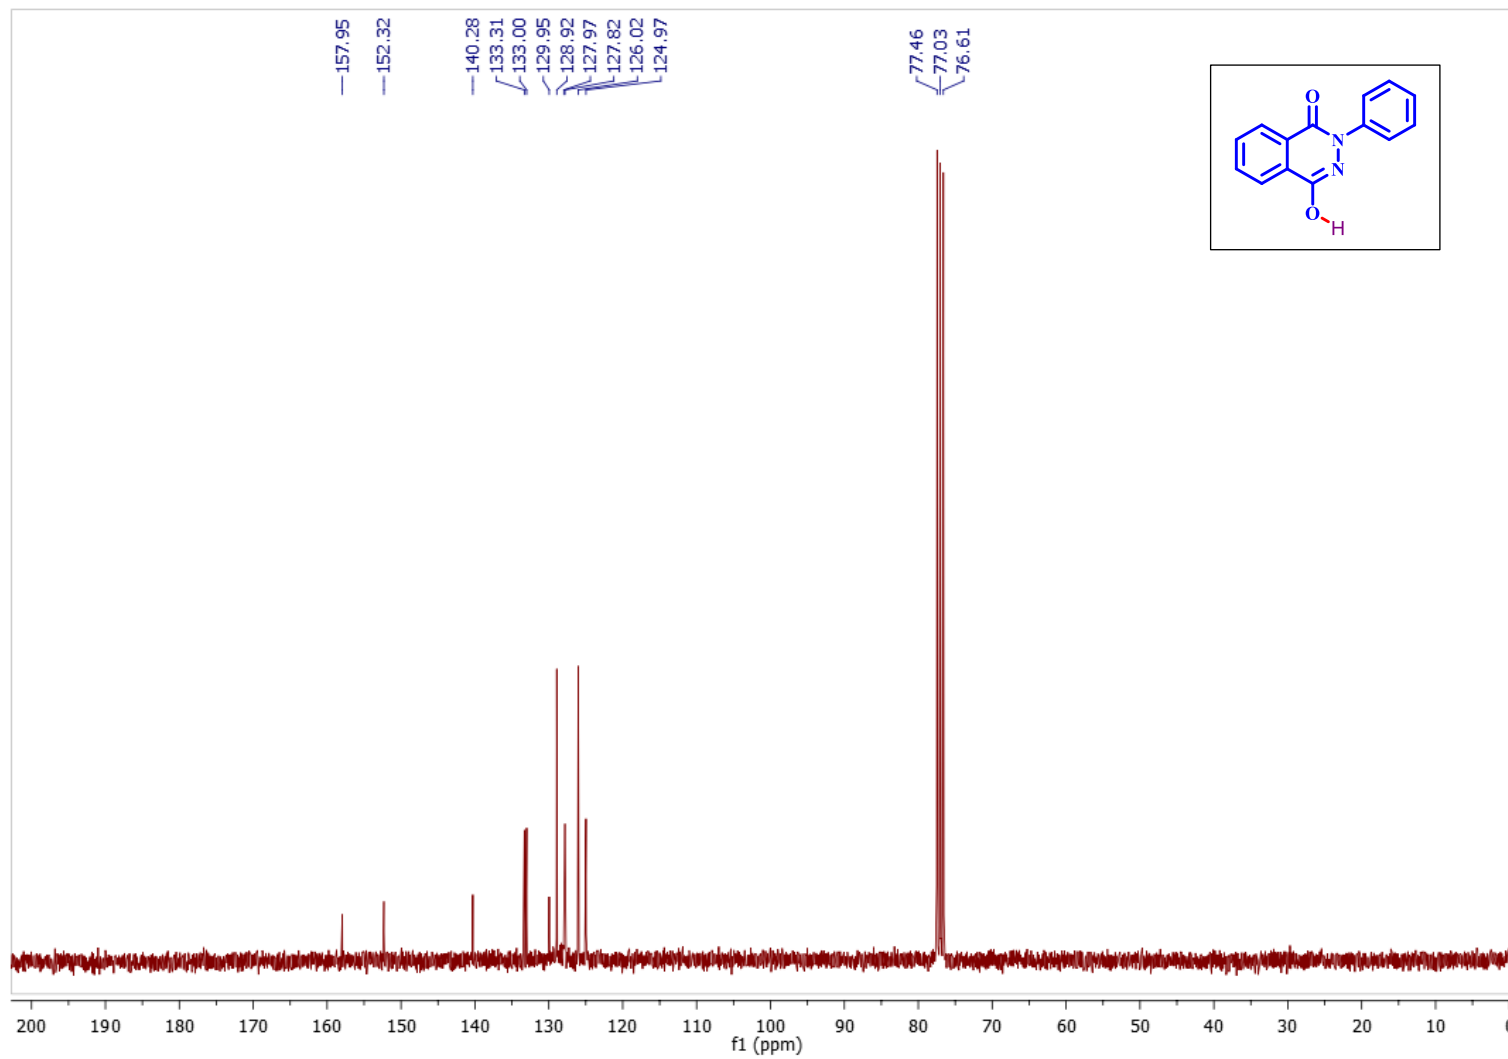

**HRMS Sepctra of 4,4'-((2-(2,4-dichlorophenyl)-2-oxoethane-1,1-diyl)bis(oxy))bis(2 phenylphthalazin-1(2H)-one) (3e):**  
**[C<sub>36</sub>H<sub>22</sub>Cl<sub>2</sub>N<sub>4</sub>O<sub>5</sub>+H]<sup>+</sup>**

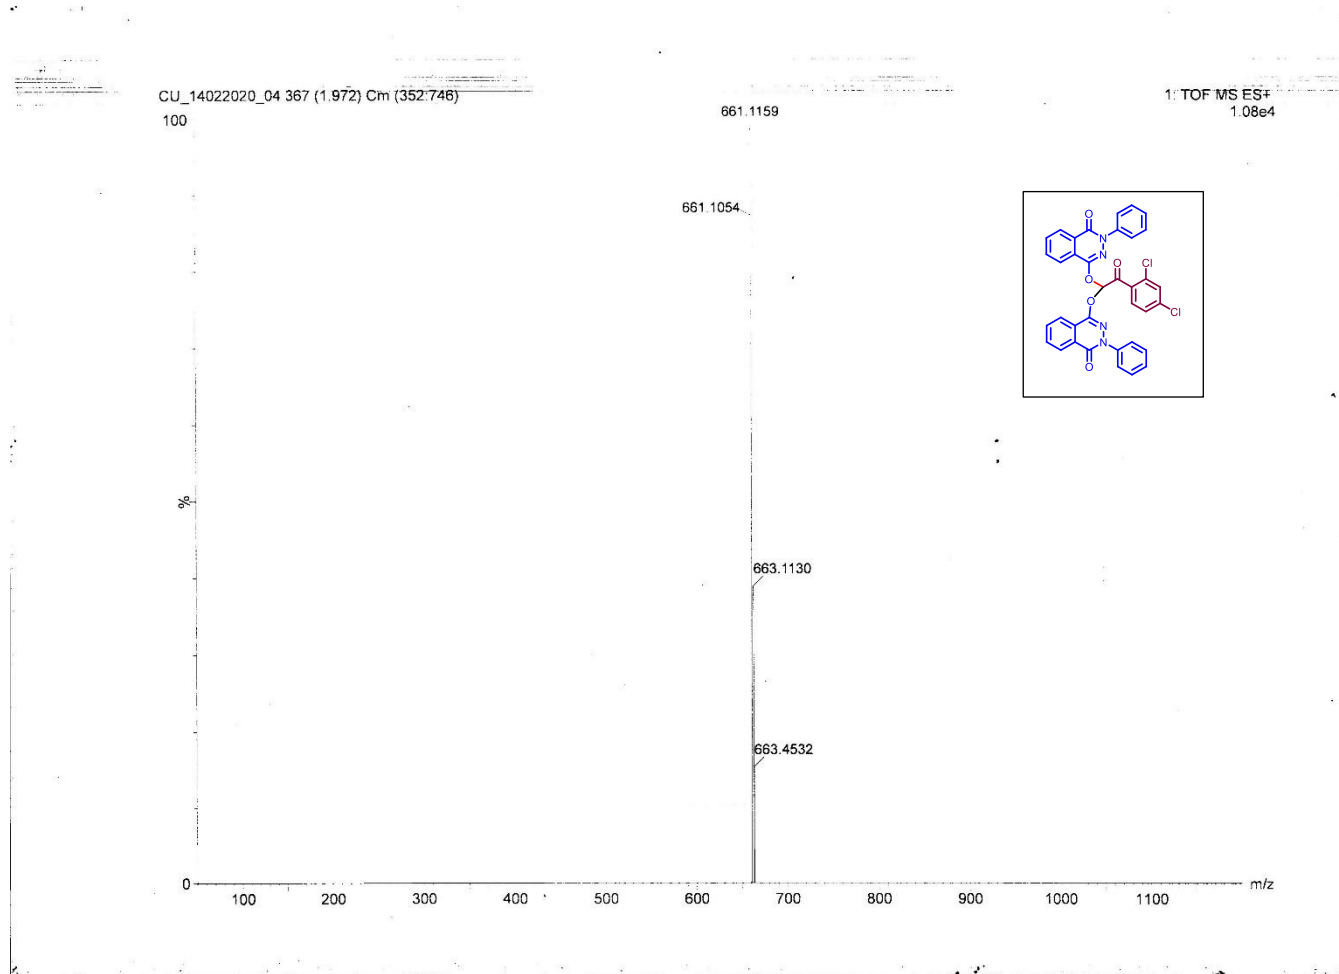

HRMS Sepctra of 4,4'-((2-oxo-2-(pyridin-2-yl)ethane-1,1-diyl)bis(oxy))bis(2 phenylphthalazin-1(2H)-one) (3t): [C<sub>35</sub>H<sub>23</sub>N<sub>5</sub>O<sub>5</sub>+H]<sup>+</sup>:

CU\_20122019\_34 445 (2.389) Cm (419.517)  
100

594.1754

1: TOF MS ES+  
5.47e6

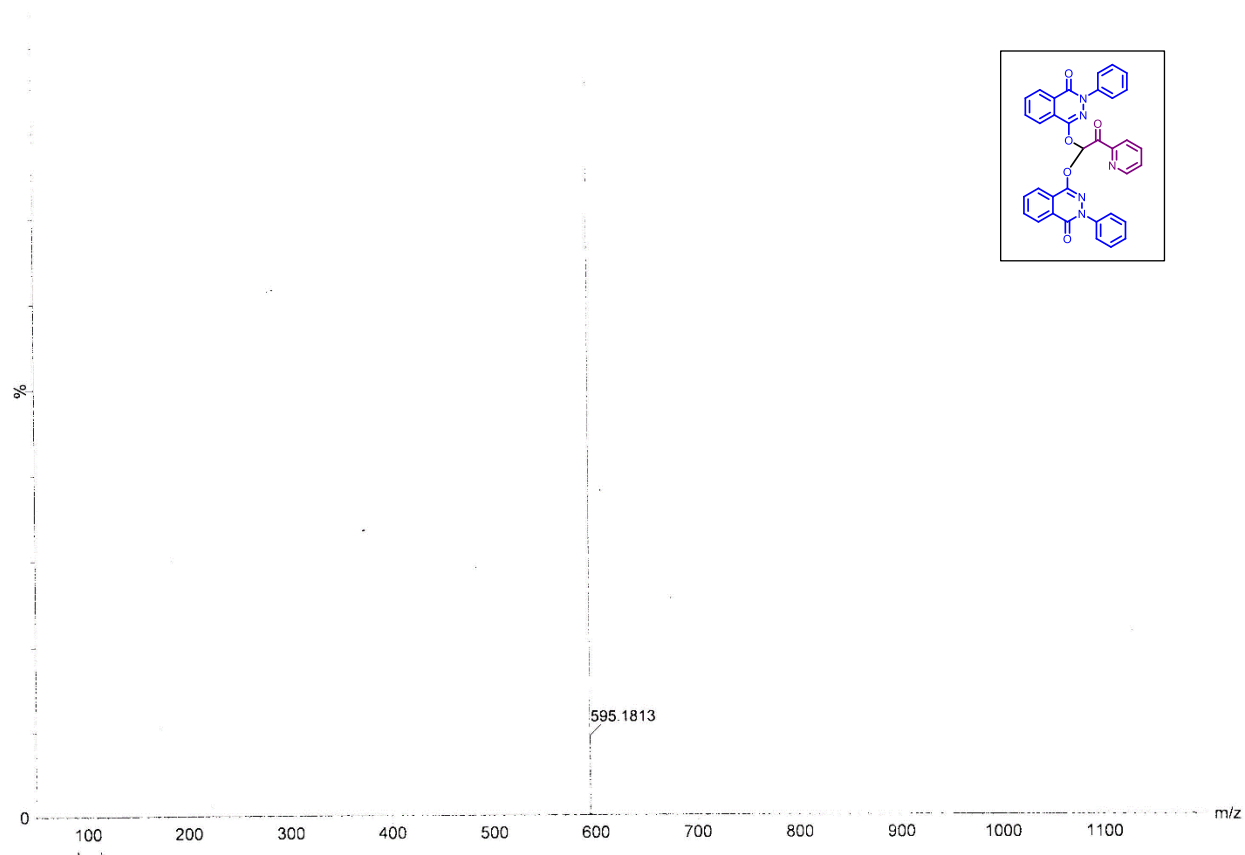



**HRMS Septra of 4,4'-((4-methyl-2-oxopentane-1,1-diyl)bis(oxy))bis(2-phenylphthalazin-1(2H)-one) (3v): [C<sub>34</sub>H<sub>28</sub>N<sub>4</sub>O<sub>5</sub>+H]<sup>+</sup>:**

CU\_07022020\_24 494 (2.654) Cm (473:523)  
100-

573.2149

1: TOF MS ES+  
3.31e7

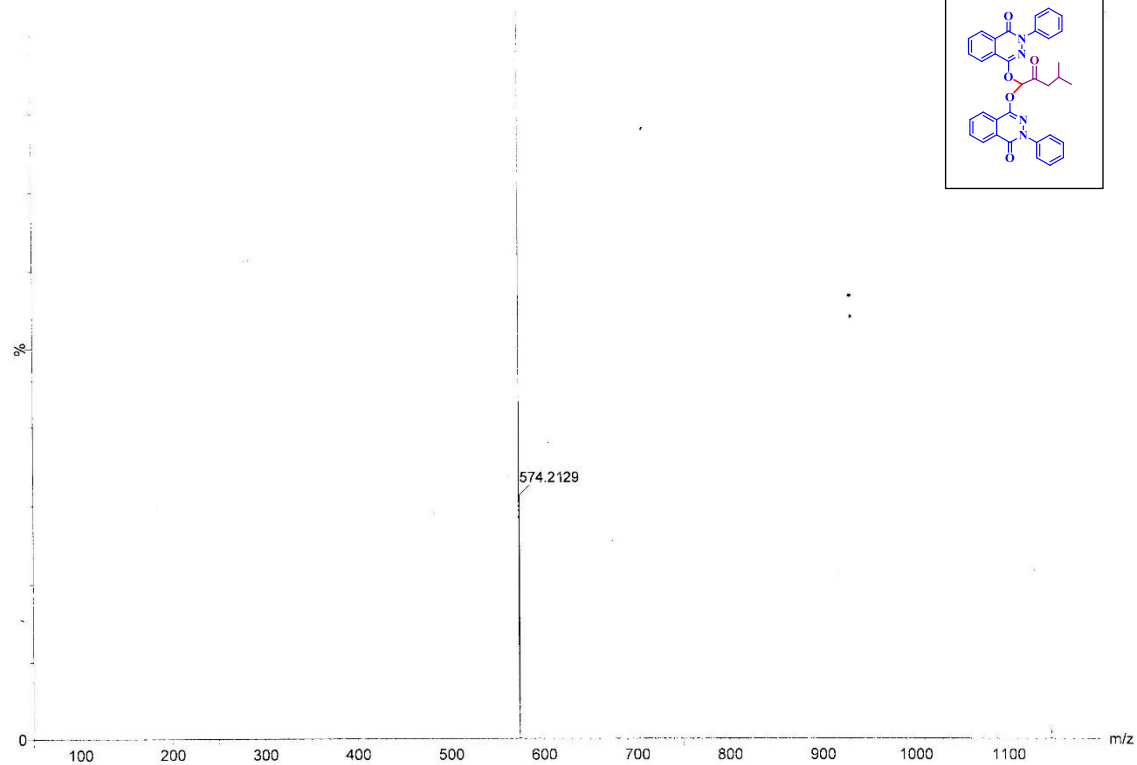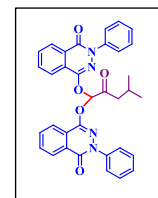

**HRMS Sepetra of 4-(2-oxo-1-((4-oxo-3-(p-tolyl)-3,4-dihydrophthalazin-1-yl)oxy)-2-(p-tolylethoxy)-2-phenylphthalazin-1(2H)-one (3zg):**  
**[C<sub>38</sub>H<sub>28</sub>N<sub>4</sub>O<sub>5</sub>+H]<sup>+</sup>:**

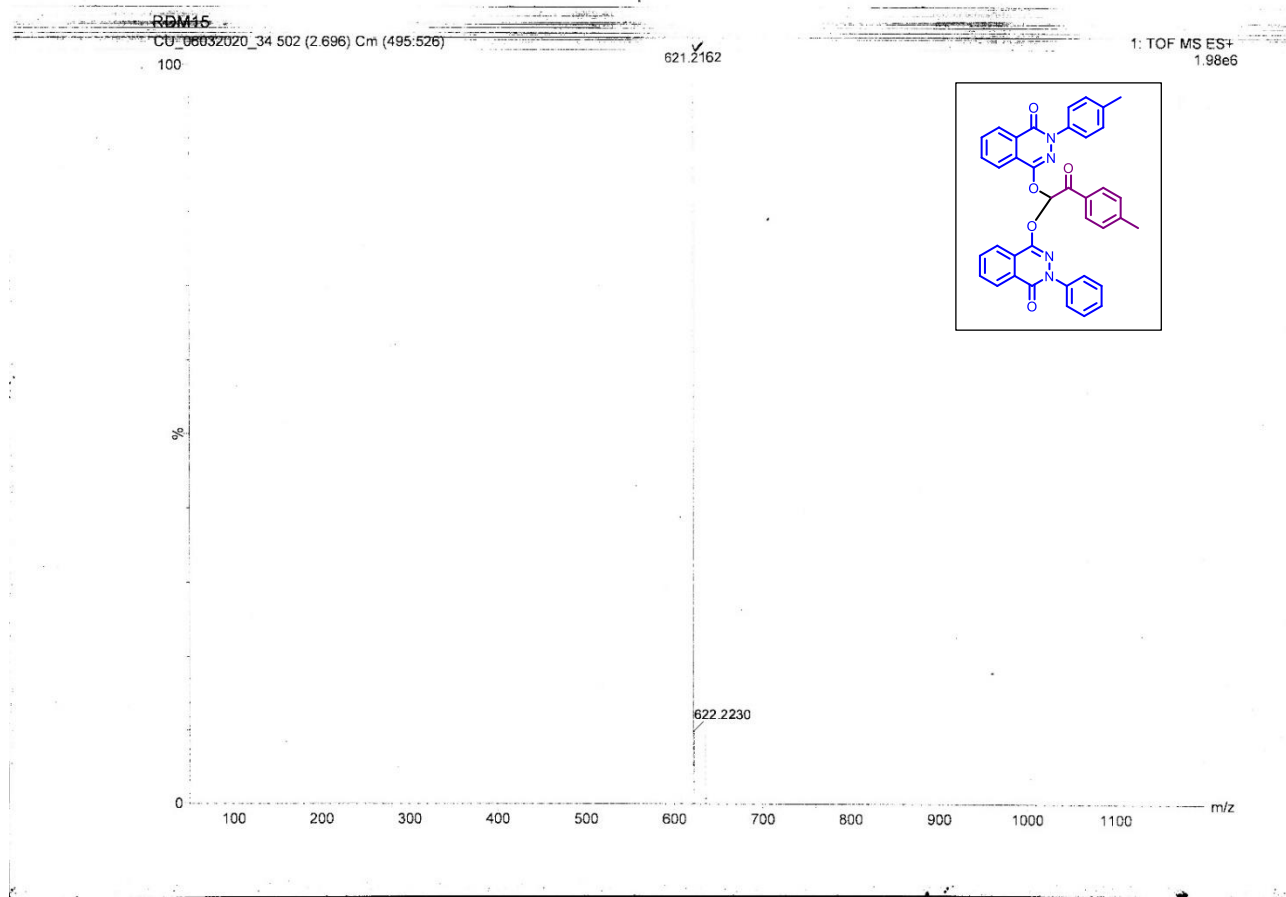

HRMS Sepctra of 4-((2-oxocyclohexyl)oxy)-2-phenylphthalazin-1(2H)-one: (3ab): [C<sub>20</sub>H<sub>18</sub>N<sub>2</sub>O<sub>3</sub>+H]<sup>+</sup>:

R2  
CU\_03012020\_34 444 (2.384) Cm (414.496)  
100- 335.1388

1: TOF MS ES+  
9.52e6

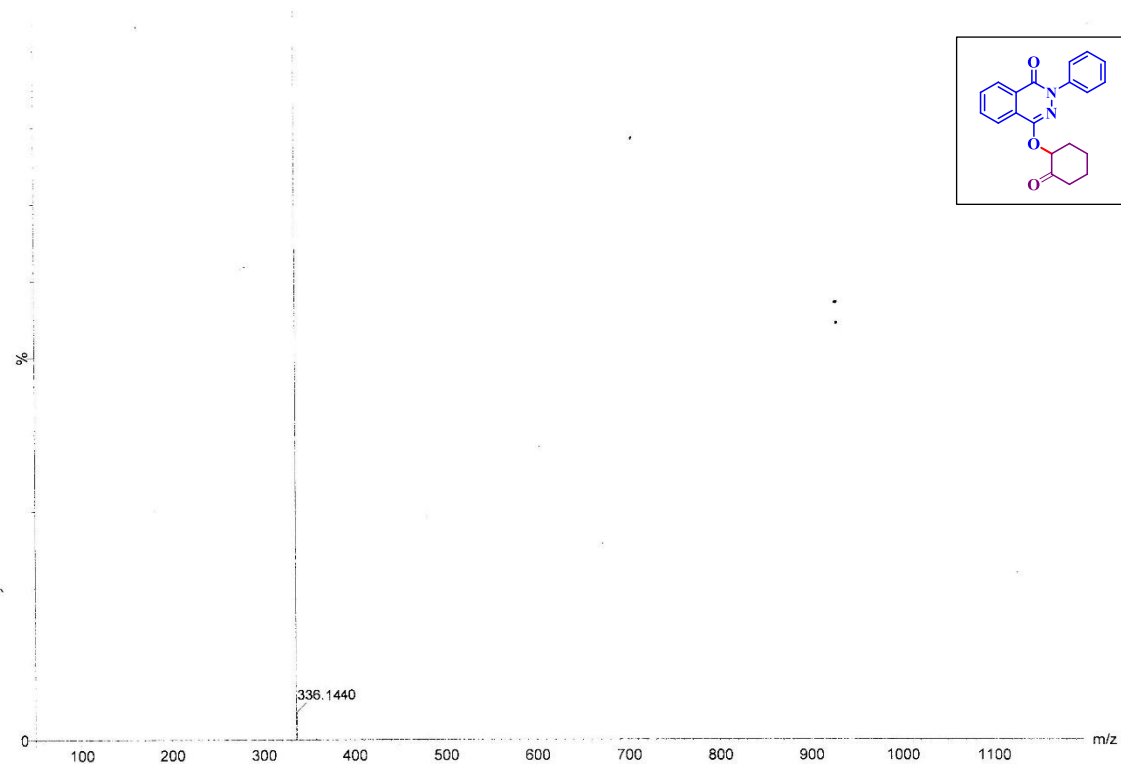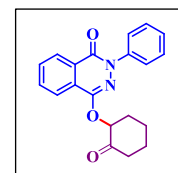

HRMS Sepetra of 1-(2,4-dichlorophenyl)-2-(pyrimidin-4-yloxy)ethan-1-one (3au): [C<sub>12</sub>H<sub>8</sub>Cl<sub>2</sub>N<sub>2</sub>O<sub>2</sub>+H]<sup>+</sup>:

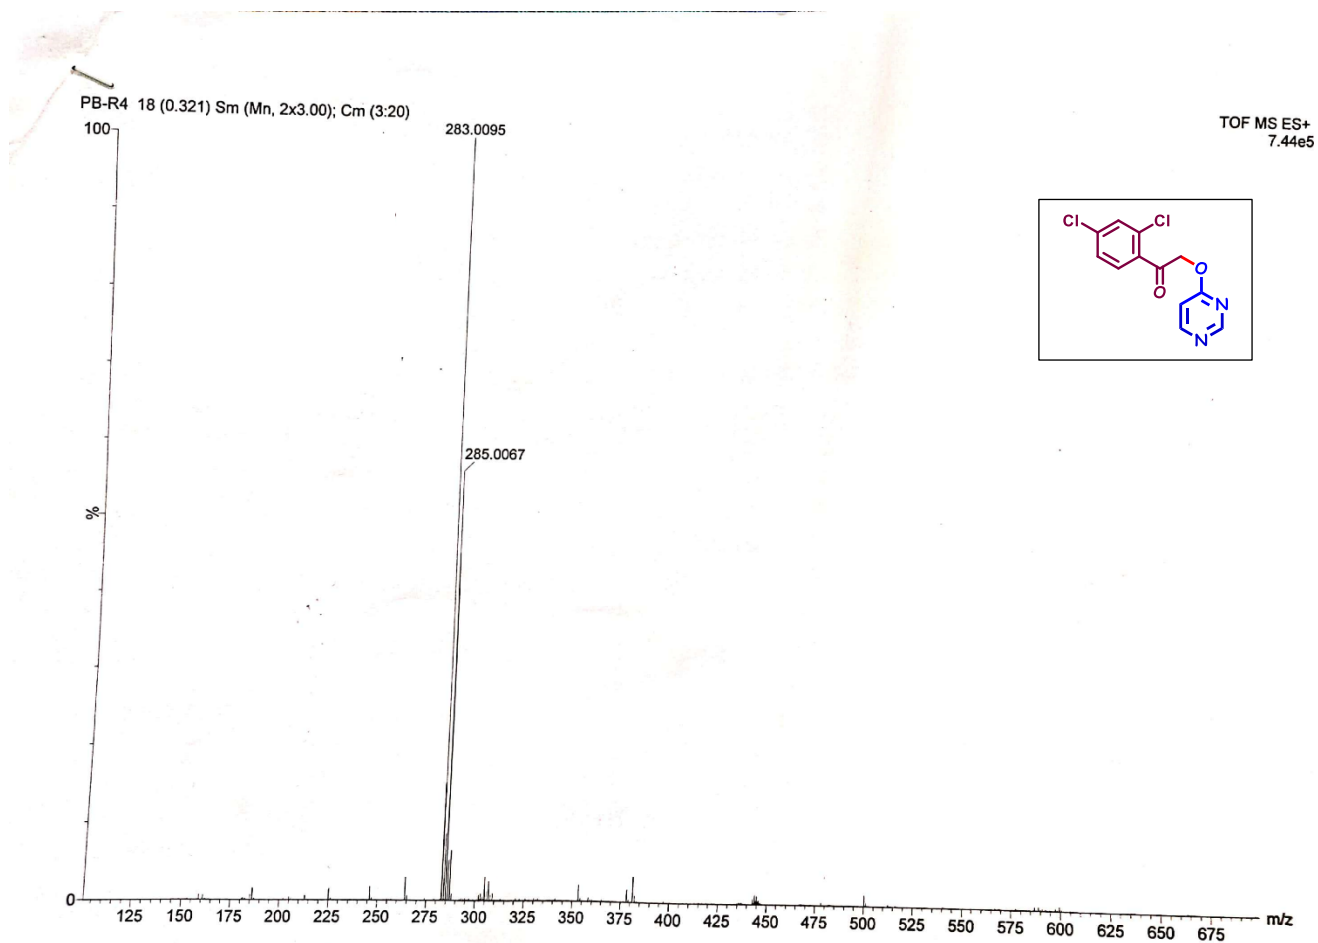

CS Scanned with CamScanner

HRMS Sepctra of 2-(p-tolyl)isoindoline-1,3-dione (4b): [C<sub>15</sub>H<sub>11</sub>NO<sub>2</sub>+H]<sup>+</sup>:

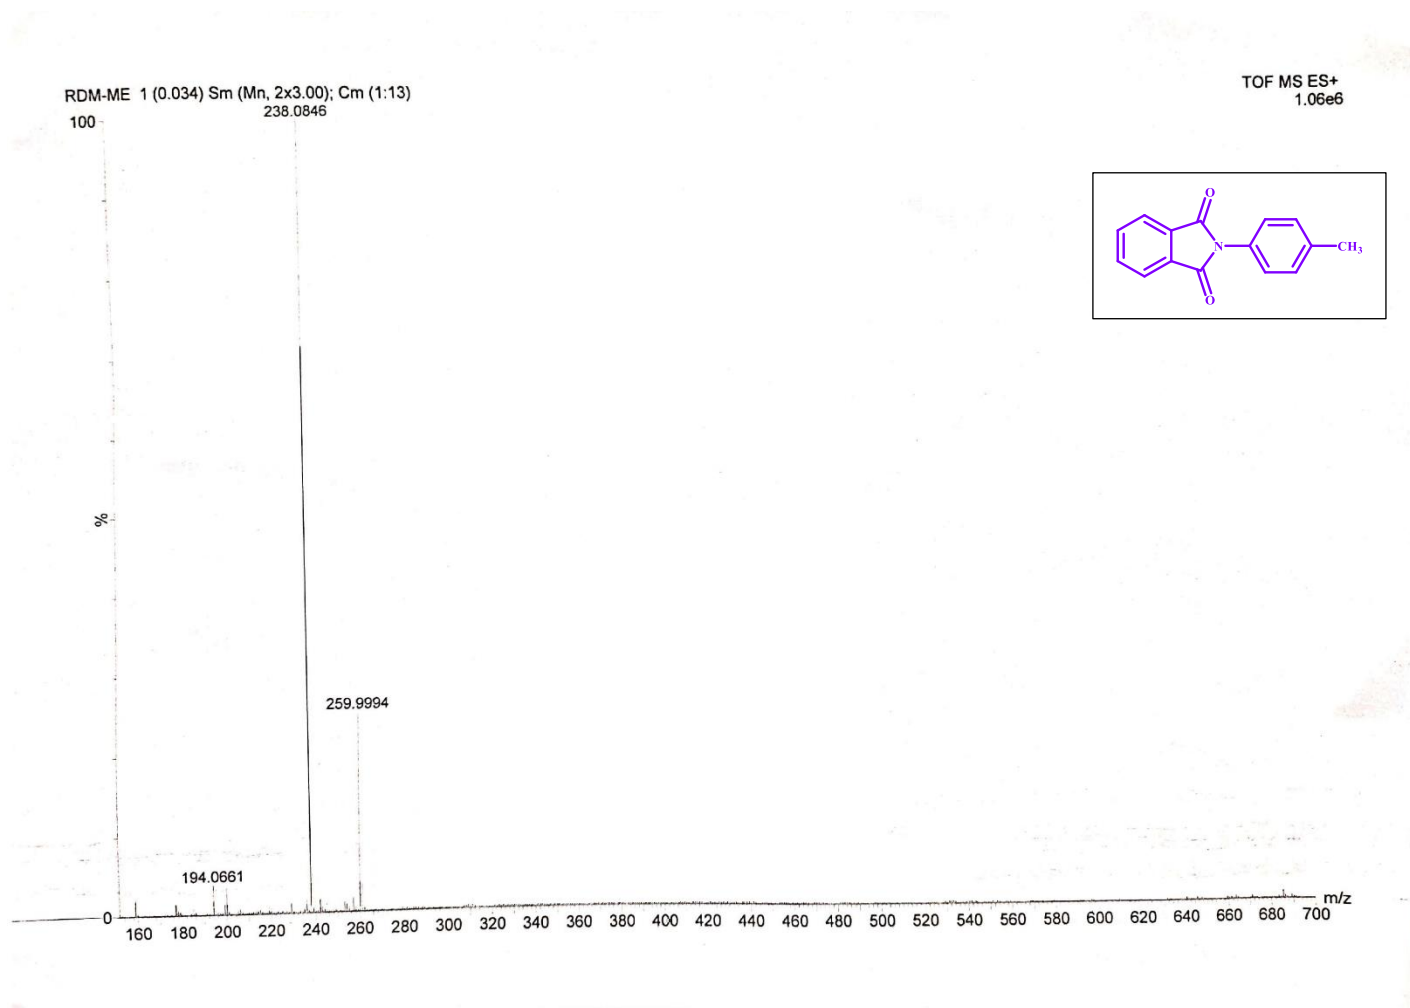

HRMS Sepetra of tert-butyl 2-(phenylcarbamoyl)benzoate (4'): [C<sub>18</sub>H<sub>19</sub>NO<sub>3</sub> +Na]<sup>+</sup>:

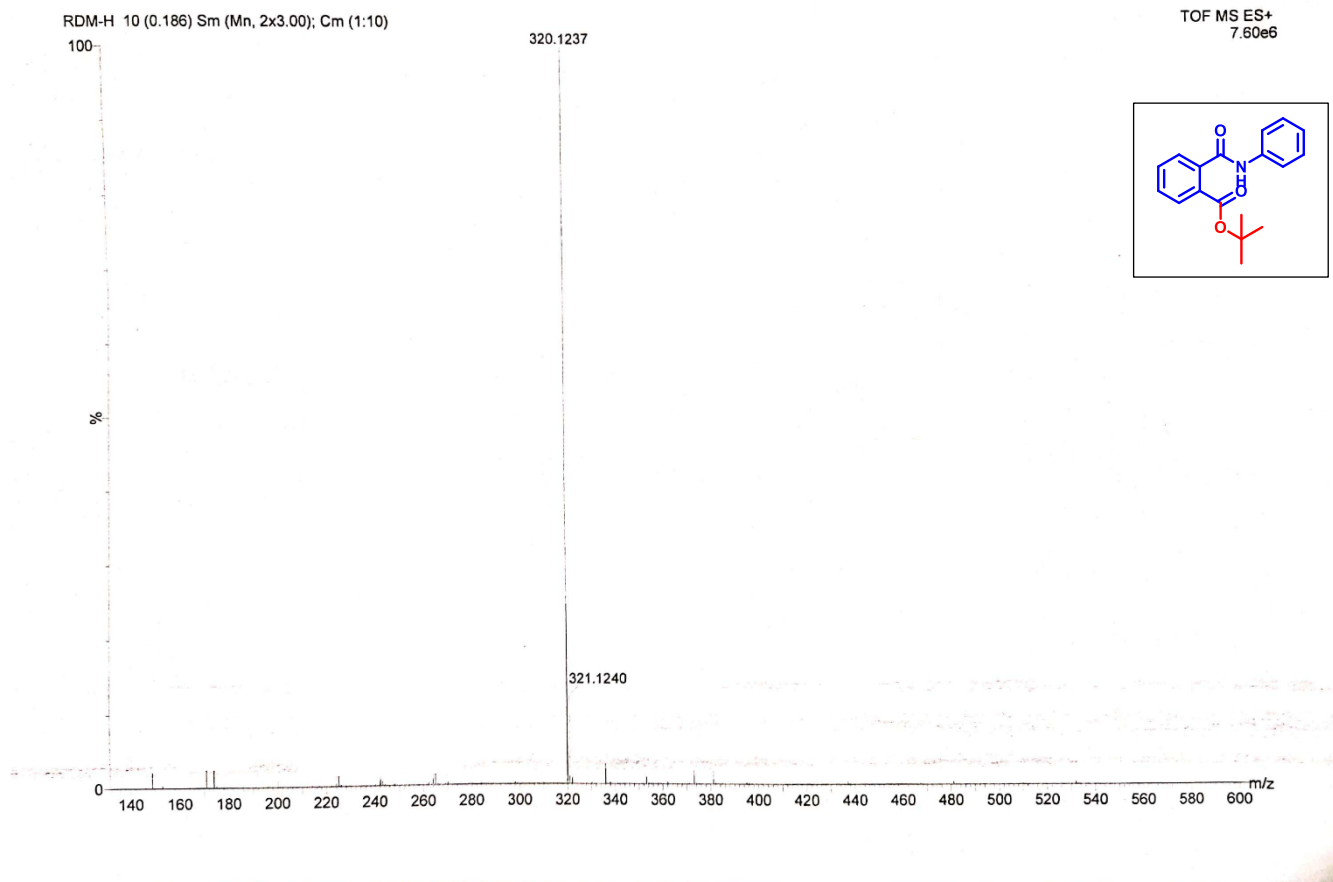

HRMS analysis of reaction mixture (RM-3) after 5hr. (I) and 8hr. (II) of oxidative  $C(sp^3)$ -O cross coupling reaction of Pyrimidinone (1r) with 2, 4- dichloro acetophenone (2e):

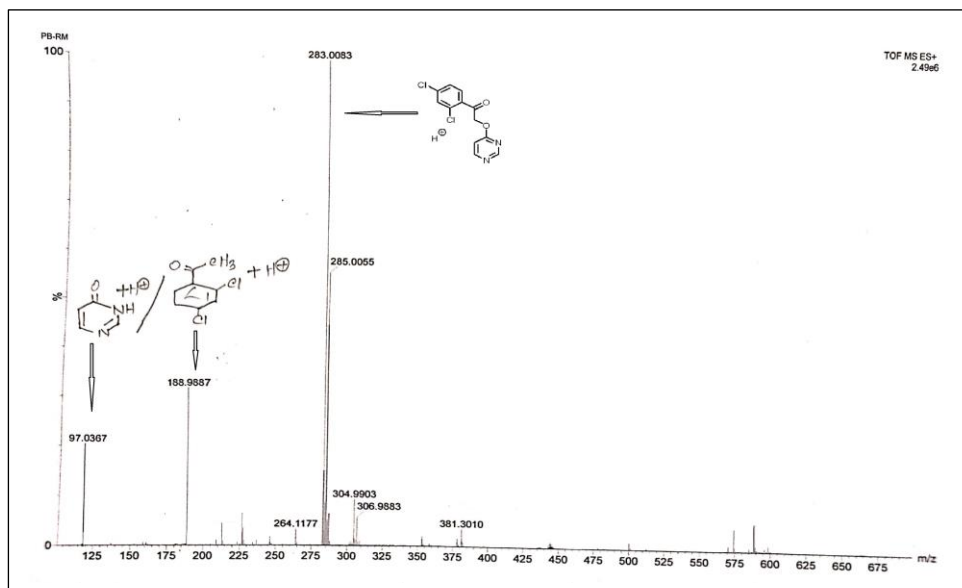

After 5 hr. (I)

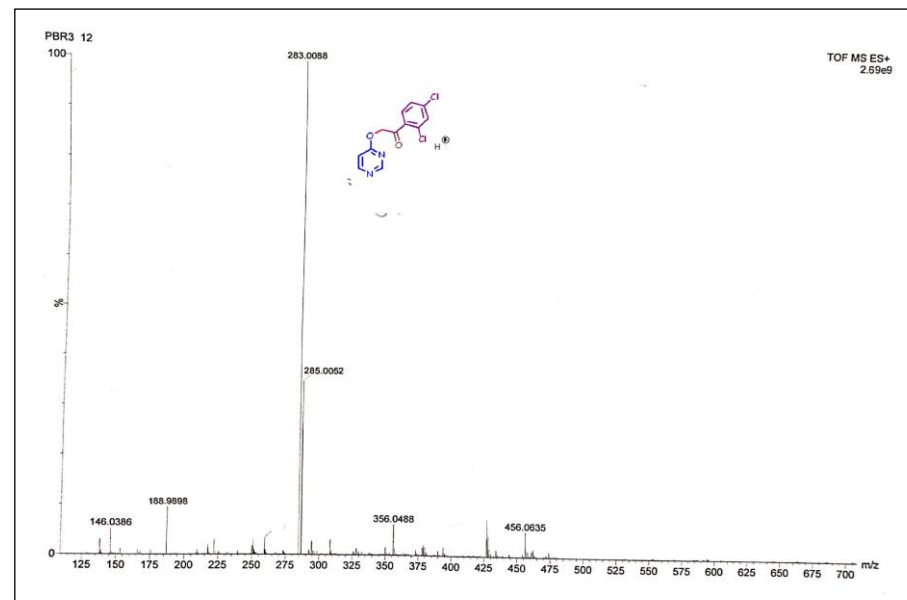

After 8 hr. (II)
